# Supplementary material
Source: publisher site journal article supplement (https://www.dovepress.com/get_supplementary_file.php?f=417549.xlsx)
Supplement: Supplementary file 1 [file get_supplementary_file.php]

## Sheet: TNBC
Disease	Disease_id	Gene	Gene_id	UniProt	Gene_Full_Name	Protein_Class	N_diseases_g	DSI_g	DPI_g	pLI	Score_gda	EL_gda	EI_gda	N_PMIDs	N_SNPs_gda	First_Ref	Last_Ref
Triple-Negative Breast Carcinoma	C4722518	ABCA1	19	O95477	ATP binding cassette subfamily A member 1	Transporter	291	0.467	0.846	1.4525e-13	0.01		1	1	0	2019	2019
Triple-Negative Breast Carcinoma	C4722518	ABCA9	10350	Q8IUA7	ATP binding cassette subfamily A member 9	Transporter	7	0.839	0.154	9.4911e-48	0.01		1	1	0	2019	2019
Triple-Negative Breast Carcinoma	C4722518	ABCB1	5243	P08183	ATP binding cassette subfamily B member 1	Transporter	933	0.344	0.885	1.2564e-05	0.1		1	12	0	2014	2020
Triple-Negative Breast Carcinoma	C4722518	ABCB6	10058	Q9NP58	ATP binding cassette subfamily B member 6 (Langereis blood group)	Transporter	400	0.431	0.885	8.5999e-19	0.01		0	1	0	2018	2018
Triple-Negative Breast Carcinoma	C4722518	ABCC1	4363	P33527	ATP binding cassette subfamily C member 1	Transporter	333	0.445	0.808	0.0011727	0.01		1	1	0	2019	2019
Triple-Negative Breast Carcinoma	C4722518	ABCC10	89845	Q5T3U5	ATP binding cassette subfamily C member 10	Transporter	31	0.682	0.385	1.2887e-26	0.01		1	1	0	2014	2014
Triple-Negative Breast Carcinoma	C4722518	ABCC4	10257	O15439	ATP binding cassette subfamily C member 4	Transporter	146	0.536	0.769	1.0674e-07	0.01		1	1	0	2017	2017
Triple-Negative Breast Carcinoma	C4722518	ABCG1	9619	P45844	ATP binding cassette subfamily G member 1	Transporter	118	0.56	0.692	0.11182	0.01		1	1	0	2019	2019
Triple-Negative Breast Carcinoma	C4722518	ABCG2	9429	Q9UNQ0	ATP binding cassette subfamily G member 2 (Junior blood group)	Transporter	420	0.419	0.885	2.0957e-32	0.03		1	3	0	2014	2017
Triple-Negative Breast Carcinoma	C4722518	ABL1	25	P00519	ABL proto-oncogene 1, non-receptor tyrosine kinase	Kinase	395	0.432	0.923	0.99998	0.02		1	2	0	2015	2015
Triple-Negative Breast Carcinoma	C4722518	ACACA	31	Q13085	acetyl-CoA carboxylase alpha		241	0.48	0.846	1	0.01		1	1	0	2017	2017
Triple-Negative Breast Carcinoma	C4722518	ACKR3	57007	P25106	atypical chemokine receptor 3	G-protein coupled receptor	400	0.428	0.885	0.39134	0.02		1	2	0	2014	2019
Triple-Negative Breast Carcinoma	C4722518	ACSL4	2182	O60488	acyl-CoA synthetase long chain family member 4	Enzyme	136	0.561	0.769	0.98103	0.02		1	2	0	2013	2019
Triple-Negative Breast Carcinoma	C4722518	ACTB	60	P60709	actin beta	Cellular structure	1110	0.325	0.923	0.98564	0.07		1	7	0	2012	2020
Triple-Negative Breast Carcinoma	C4722518	ACVR1	90	Q04771	activin A receptor type 1	Kinase	144	0.535	0.731	0.3254	0.01		0	1	0	2018	2018
Triple-Negative Breast Carcinoma	C4722518	ACVR1B	91	P36896	activin A receptor type 1B	Kinase	41	0.663	0.385	0.99969	0.01		1	1	0	2019	2019
Triple-Negative Breast Carcinoma	C4722518	ADAM10	102	O14672	ADAM metallopeptidase domain 10		224	0.489	0.846	1	0.02		1	2	0	2020	2020
Triple-Negative Breast Carcinoma	C4722518	ADAM12	8038	O43184	ADAM metallopeptidase domain 12	Enzyme	107	0.565	0.731	5.7284e-07	0.02		1	2	0	2012	2014
Triple-Negative Breast Carcinoma	C4722518	ADAM17	6868	P78536	ADAM metallopeptidase domain 17		316	0.453	0.808	0.99528	0.02		1	2	0	2015	2020
Triple-Negative Breast Carcinoma	C4722518	ADAM33	80332	Q9BZ11	ADAM metallopeptidase domain 33	Enzyme	49	0.636	0.423	2.1487e-15	0.01		1	1	0	2017	2017
Triple-Negative Breast Carcinoma	C4722518	ADAM8	101	P78325	ADAM metallopeptidase domain 8	Enzyme	81	0.59	0.731	2.1983e-14	0.01		1	1	0	2016	2016
Triple-Negative Breast Carcinoma	C4722518	ADAR	103	P55265	adenosine deaminase RNA specific	Enzyme	256	0.501	0.808	0.026282	0.01		0	1	0	2017	2017
Triple-Negative Breast Carcinoma	C4722518	ADIPOQ	9370	Q15848	adiponectin, C1Q and collagen domain containing		679	0.376	0.885	4.6434e-09	0.01		1	1	0	2017	2017
Triple-Negative Breast Carcinoma	C4722518	ADORA2B	136	P29275	adenosine A2b receptor	G-protein coupled receptor	66	0.617	0.692	1.7674e-05	0.01		1	1	0	2018	2018
Triple-Negative Breast Carcinoma	C4722518	ADRA1A	148	P35348	adrenoceptor alpha 1A	G-protein coupled receptor	294	0.462	0.846	3.3722e-07	0.01		1	1	0	2014	2014
Triple-Negative Breast Carcinoma	C4722518	ADRA2B	151	P18089	adrenoceptor alpha 2B	G-protein coupled receptor	296	0.465	0.846	4.4533e-06	0.01		1	1	0	2014	2014
Triple-Negative Breast Carcinoma	C4722518	ADRB2	154	P07550	adrenoceptor beta 2	G-protein coupled receptor	387	0.442	0.923	0.52545	0.01		1	1	0	2018	2018
Triple-Negative Breast Carcinoma	C4722518	ADSL	158	P30566	adenylosuccinate lyase	Enzyme	84	0.631	0.654	8.9207e-12	0.01		1	1	0	2019	2019
Triple-Negative Breast Carcinoma	C4722518	AFAP1-AS1	84740		AFAP1 antisense RNA 1		80	0.573	0.538		0.02		1	2	0	2018	2018
Triple-Negative Breast Carcinoma	C4722518	AGER	177	Q15109	advanced glycosylation end-product specific receptor	Receptor	450	0.42	0.885	6.3528e-16	0.04		1	4	0	2015	2019
Triple-Negative Breast Carcinoma	C4722518	AHNAK	79026	Q09666	AHNAK nucleoprotein		60	0.623	0.615	0.89827	0.01		1	1	0	2017	2017
Triple-Negative Breast Carcinoma	C4722518	AHR	196	P35869	aryl hydrocarbon receptor	Transcription factor	532	0.41	0.923	0.99999	0.05		1	5	0	2013	2020
Triple-Negative Breast Carcinoma	C4722518	AHSA1	10598	O95433	activator of HSP90 ATPase activity 1		526	0.396	0.923	0.99896	0.03		1	3	0	2018	2019
Triple-Negative Breast Carcinoma	C4722518	AIMP2	7965	Q13155	aminoacyl tRNA synthetase complex interacting multifunctional protein 2		555	0.393	0.923	0.008024	0.03		1	3	0	2018	2019
Triple-Negative Breast Carcinoma	C4722518	AKR1C3	8644	P42330	aldo-keto reductase family 1 member C3	Enzyme	142	0.529	0.769	7.5812e-24	0.01		1	1	0	2013	2013
Triple-Negative Breast Carcinoma	C4722518	AKT1	207	P31749	AKT serine/threonine kinase 1	Kinase	1250	0.311	0.962	0.9759	0.1		1	35	0	2014	2020
Triple-Negative Breast Carcinoma	C4722518	AKT2	208	P31751	AKT serine/threonine kinase 2	Kinase	264	0.474	0.769	0.64432	0.01		1	1	0	2018	2018
Triple-Negative Breast Carcinoma	C4722518	AKT3	10000	Q9Y243	AKT serine/threonine kinase 3	Kinase	183	0.512	0.808	0.99958	0.05		1	5	0	2014	2018
Triple-Negative Breast Carcinoma	C4722518	ALB	213	P02768	albumin	Transporter	1198	0.317	0.962	0.64329	0.03		1	3	0	2017	2019
Triple-Negative Breast Carcinoma	C4722518	ALCAM	214	Q13740	activated leukocyte cell adhesion molecule	Cell adhesion	181	0.502	0.808	0.73267	0.01		1	1	0	2019	2019
Triple-Negative Breast Carcinoma	C4722518	ALDH1A1	216	P00352	aldehyde dehydrogenase 1 family member A1	Enzyme	270	0.46	0.846	0.95448	0.05		1	5	0	2012	2019
Triple-Negative Breast Carcinoma	C4722518	ALDH1A3	220	P47895	aldehyde dehydrogenase 1 family member A3	Enzyme	83	0.578	0.654	0.14128	0.03		1	3	0	2015	2020
Triple-Negative Breast Carcinoma	C4722518	ALPK1	80216	Q96QP1	alpha kinase 1	Kinase	54	0.644	0.615	1.0188e-19	0.01		1	1	0	2016	2016
Triple-Negative Breast Carcinoma	C4722518	ALX3	257	O95076	ALX homeobox 3		91	0.578	0.692	0.019117	0.01		1	1	0	2019	2019
Triple-Negative Breast Carcinoma	C4722518	ANGPT2	285	O15123	angiopoietin 2	Signaling	457	0.41	0.846	0.83208	0.01		1	1	0	2013	2013
Triple-Negative Breast Carcinoma	C4722518	ANIB1	116833		aneurysm, intracranial berry 1		62	0.608	0.5		0.01		1	1	0	2019	2019
Triple-Negative Breast Carcinoma	C4722518	ANKRD1	27063	Q15327	ankyrin repeat domain 1		65	0.628	0.692	2.6259e-10	0.01		1	1	0	2019	2019
Triple-Negative Breast Carcinoma	C4722518	ANKRD36B	57730	Q8N2N9	ankyrin repeat domain 36B		82	0.584	0.5		0.02		1	2	0	2016	2017
Triple-Negative Breast Carcinoma	C4722518	ANP32E	81611	Q9BTT0	acidic nuclear phosphoprotein 32 family member E	Enzyme modulator	8	0.839	0.115	0.84376	0.01		1	1	0	2018	2018
Triple-Negative Breast Carcinoma	C4722518	ANTXR1	84168	Q9H6X2	ANTXR cell adhesion molecule 1	Receptor	137	0.584	0.731	0.98631	0.02		1	2	0	2018	2019
Triple-Negative Breast Carcinoma	C4722518	ANXA1	301	P04083	annexin A1		336	0.442	0.885	1.2009e-07	0.04		1	4	0	2017	2019
Triple-Negative Breast Carcinoma	C4722518	ANXA2	302	P07355	annexin A2		294	0.453	0.808	9.7728e-05	0.04		1	4	0	2014	2019
Triple-Negative Breast Carcinoma	C4722518	ANXA3	306	P12429	annexin A3		66	0.61	0.615	6.5152e-12	0.03		1	3	0	2017	2019
Triple-Negative Breast Carcinoma	C4722518	ANXA5	308	P08758	annexin A5		283	0.458	0.769	3.7978e-15	0.02		1	2	0	2018	2018
Triple-Negative Breast Carcinoma	C4722518	ANXA6	309	P08133	annexin A6		156	0.514	0.846	1.0804e-08	0.02		0.5	2	0	2019	2019
Triple-Negative Breast Carcinoma	C4722518	AP1S3	130340	Q96PC3	adaptor related protein complex 1 subunit sigma 3	Transporter	22	0.711	0.385	0.016298	0.01		1	1	0	2018	2018
Triple-Negative Breast Carcinoma	C4722518	APC	324	P25054	APC regulator of WNT signaling pathway		703	0.373	0.962	1	0.01		1	1	0	2019	2019
Triple-Negative Breast Carcinoma	C4722518	APEX1	328	P27695	apurinic/apyrimidinic endodeoxyribonuclease 1		305	0.458	0.846	1.9191e-07	0.05		1	5	0	2012	2019
Triple-Negative Breast Carcinoma	C4722518	APRT	353	P07741	adenine phosphoribosyltransferase		384	0.423	0.846	5.4539e-13	0.03		1	3	0	2015	2019
Triple-Negative Breast Carcinoma	C4722518	AQP3	360	Q92482	aquaporin 3 (Gill blood group)	Ion channel	124	0.546	0.769	0.13398	0.01		1	1	0	2018	2018
Triple-Negative Breast Carcinoma	C4722518	AQP4	361	P55087	aquaporin 4	Ion channel	311	0.456	0.885	0.0022919	0.01		1	1	0	2017	2017
Triple-Negative Breast Carcinoma	C4722518	AQP5	362	P55064	aquaporin 5	Ion channel	119	0.552	0.769	0.053249	0.01		1	1	0	2018	2018
Triple-Negative Breast Carcinoma	C4722518	AR	367	P10275	androgen receptor	Nuclear receptor	854	0.351	0.846	0.98837	0.1		0.987	75	0	2010	2020
Triple-Negative Breast Carcinoma	C4722518	ARF1	375	P84077	ADP ribosylation factor 1		61	0.626	0.615	0.89967	0.01		1	1	0	2015	2015
Triple-Negative Breast Carcinoma	C4722518	ARHGAP1	392	Q07960	Rho GTPase activating protein 1		48	0.638	0.577	0.76774	0.01		1	1	0	2017	2017
Triple-Negative Breast Carcinoma	C4722518	ARHGAP18	93663	Q8N392	Rho GTPase activating protein 18	Enzyme modulator	18	0.736	0.346	8.4436e-12	0.01		1	1	0	2017	2017
Triple-Negative Breast Carcinoma	C4722518	ARHGAP24	83478	Q8N264	Rho GTPase activating protein 24		273	0.456	0.808	3.9495e-10	0.02		1	2	0	2012	2013
Triple-Negative Breast Carcinoma	C4722518	ARHGEF2	9181	Q92974	Rho/Rac guanine nucleotide exchange factor 2		205	0.502	0.769	1	0.01		1	1	0	2019	2019
Triple-Negative Breast Carcinoma	C4722518	ARID1A	8289	O14497	AT-rich interaction domain 1A		341	0.455	0.846	1	0.02		1	2	0	2012	2018
Triple-Negative Breast Carcinoma	C4722518	ARID1B	57492	Q8NFD5	AT-rich interaction domain 1B		270	0.503	0.846	1	0.01		1	1	0	2019	2019
Triple-Negative Breast Carcinoma	C4722518	ARR3	407	P36575	arrestin 3	Enzyme modulator	279	0.46	0.846	0.10401	0.03		1	3	0	2018	2019
Triple-Negative Breast Carcinoma	C4722518	ARRB1	408	P49407	arrestin beta 1	Enzyme modulator	92	0.588	0.846	0.99394	0.01		1	1	0	2019	2019
Triple-Negative Breast Carcinoma	C4722518	ARRDC3	57561	Q96B67	arrestin domain containing 3		24	0.711	0.308	0.98715	0.02		1	2	0	2018	2019
Triple-Negative Breast Carcinoma	C4722518	ARSA	410	P15289	arylsulfatase A	Enzyme	376	0.448	0.923	1.0893e-11	0.01		1	1	0	2012	2012
Triple-Negative Breast Carcinoma	C4722518	ASPM	259266	Q8IZT6	abnormal spindle microtubule assembly		159	0.526	0.769	3.3502e-49	0.01		1	1	0	2013	2013
Triple-Negative Breast Carcinoma	C4722518	ATAD2	29028	Q6PL18	ATPase family AAA domain containing 2	Epigenetic regulator	51	0.636	0.423	0.9982	0.01		1	1	0	2020	2020
Triple-Negative Breast Carcinoma	C4722518	ATAD5	79915	Q96QE3	ATPase family AAA domain containing 5		33	0.711	0.385	1	0.01		1	1	0	2016	2016
Triple-Negative Breast Carcinoma	C4722518	ATF4	468	P18848	activating transcription factor 4		178	0.507	0.769	0.015659	0.03		1	3	0	2015	2018
Triple-Negative Breast Carcinoma	C4722518	ATG5	9474	Q9H1Y0	autophagy related 5	Transporter	282	0.462	0.885	0.97758	0.01		1	1	1	2018	2018
Triple-Negative Breast Carcinoma	C4722518	ATG7	10533	O95352	autophagy related 7	Enzyme	179	0.505	0.769	7.3758e-12	0.01		1	1	0	2019	2019
Triple-Negative Breast Carcinoma	C4722518	ATG9A	79065	Q7Z3C6	autophagy related 9A		30	0.691	0.308	0.97081	0.01		1	1	0	2018	2018
Triple-Negative Breast Carcinoma	C4722518	ATM	472	Q13315	ATM serine/threonine kinase	Kinase	684	0.374	0.885	5.5884e-47	0.03		1	3	0	2008	2018
Triple-Negative Breast Carcinoma	C4722518	ATN1	1822	P54259	atrophin 1		499	0.409	0.885	0.99992	0.01		1	1	0	2019	2019
Triple-Negative Breast Carcinoma	C4722518	ATR	545	Q13535	ATR serine/threonine kinase	Kinase	321	0.456	0.923	3.5177e-09	0.04		1	4	0	2015	2019
Triple-Negative Breast Carcinoma	C4722518	ATXN1	6310	P54253	ataxin 1		218	0.534	0.769	0.97498	0.01		1	1	0	2017	2017
Triple-Negative Breast Carcinoma	C4722518	AURKA	6790	O14965	aurora kinase A	Kinase	245	0.475	0.731	0.8676	0.04		1	4	0	2019	2019
Triple-Negative Breast Carcinoma	C4722518	AXIN2	8313	Q9Y2T1	axin 2		169	0.507	0.692	0.57015	0.02		1	2	0	2013	2018
Triple-Negative Breast Carcinoma	C4722518	AXL	558	P30530	AXL receptor tyrosine kinase	Kinase	203	0.489	0.615	0.012951	0.1		1	10	0	2013	2019
Triple-Negative Breast Carcinoma	C4722518	AZGP1	563	P25311	alpha-2-glycoprotein 1, zinc-binding		101	0.566	0.769	4.1545e-06	0.01		1	1	0	2019	2019
Triple-Negative Breast Carcinoma	C4722518	B3GNT3	10331	Q9Y2A9	UDP-GlcNAc:betaGal beta-1,3-N-acetylglucosaminyltransferase 3	Enzyme	21	0.736	0.308	0.73888	0.01		1	1	0	2018	2018
Triple-Negative Breast Carcinoma	C4722518	BABAM1	29086	Q9NWV8	BRISC and BRCA1 A complex member 1		27	0.678	0.385	0.96269	0.01		1	1	3	2016	2016
Triple-Negative Breast Carcinoma	C4722518	BABAM2	9577	Q9NXR7	BRISC and BRCA1 A complex member 2		42	0.682	0.538	0.16651	0.01		1	1	0	2016	2016
Triple-Negative Breast Carcinoma	C4722518	BAD	572	Q92934	BCL2 associated agonist of cell death		125	0.553	0.769	0.0046237	0.02		1	2	0	2016	2019
Triple-Negative Breast Carcinoma	C4722518	BAG2	9532	O95816	BAG cochaperone 2		15	0.78	0.231	0.042	0.01		1	1	0	2017	2017
Triple-Negative Breast Carcinoma	C4722518	BAG3	9531	O95817	BAG cochaperone 3		223	0.498	0.846	0.61738	0.04		1	4	0	2013	2019
Triple-Negative Breast Carcinoma	C4722518	BAK1	578	Q16611	BCL2 antagonist/killer 1	Signaling	115	0.555	0.769	7.4028e-06	0.01		1	1	0	2018	2018
Triple-Negative Breast Carcinoma	C4722518	BAP1	8314	Q92560	BRCA1 associated protein 1	Enzyme	299	0.454	0.731	0.99443	0.01		1	1	0	2018	2018
Triple-Negative Breast Carcinoma	C4722518	BARD1	580	Q99728	BRCA1 associated RING domain 1		75	0.597	0.538	1.3777e-24	0.03		1	3	2	2015	2018
Triple-Negative Breast Carcinoma	C4722518	BAX	581	Q07812	BCL2 associated X, apoptosis regulator	Signaling	420	0.417	0.885	0.31746	0.01		1	1	0	2018	2018
Triple-Negative Breast Carcinoma	C4722518	BBC3	27113	Q96PG8;Q9BXH1	BCL2 binding component 3		157	0.517	0.769	0.0039762	0.01		1	1	0	2018	2018
Triple-Negative Breast Carcinoma	C4722518	BCAP31	10134	P51572	B cell receptor associated protein 31	Transporter	101	0.579	0.808	0.43366	0.01		1	1	0	2019	2019
Triple-Negative Breast Carcinoma	C4722518	BCAR1	9564	P56945	BCAR1 scaffold protein, Cas family member		176	0.518	0.846	0.99808	0.01		1	1	0	2013	2013
Triple-Negative Breast Carcinoma	C4722518	BCCIP	56647	Q9P287	BRCA2 and CDKN1A interacting protein		32	0.705	0.385	0.0078502	0.01		1	1	0	2017	2017
Triple-Negative Breast Carcinoma	C4722518	BCL10	8915	O95999	BCL10 immune signaling adaptor		205	0.491	0.769	0.33709	0.01		1	1	0	2018	2018
Triple-Negative Breast Carcinoma	C4722518	BCL11A	53335	Q9H165	BAF chromatin remodeling complex subunit BCL11A	Transcription factor	154	0.541	0.769	0.96998	0.04		1	4	0	2018	2018
Triple-Negative Breast Carcinoma	C4722518	BCL2	596	P10415	BCL2 apoptosis regulator	Signaling	1456	0.291	0.885	0.55903	0.1		1	22	0	2011	2019
Triple-Negative Breast Carcinoma	C4722518	BCL2A1	597	Q16548	BCL2 related protein A1	Signaling	150	0.529	0.731	0.20785	0.02		1	2	0	2018	2019
Triple-Negative Breast Carcinoma	C4722518	BCL2L1	598	Q07817	BCL2 like 1	Signaling	212	0.493	0.885	0.93667	0.01		1	1	0	2015	2015
Triple-Negative Breast Carcinoma	C4722518	BCL2L12	83596	Q9HB09	BCL2 like 12		67	0.606	0.654	3.8273e-09	0.01		1	1	0	2015	2015
Triple-Negative Breast Carcinoma	C4722518	BCL2L14	79370	Q9BZR8	BCL2 like 14		15	0.78	0.192	3.3304e-05	0.01		1	1	0	2018	2018
Triple-Negative Breast Carcinoma	C4722518	BCL3	602	P20749	BCL3 transcription coactivator		136	0.541	0.731	0.98871	0.01		1	1	0	2018	2018
Triple-Negative Breast Carcinoma	C4722518	BCL6	604	P41182	BCL6 transcription repressor		309	0.444	0.808	0.96038	0.01		1	1	0	2016	2016
Triple-Negative Breast Carcinoma	C4722518	BCYRN1	618		brain cytoplasmic RNA 1		38	0.666	0.423		0.01		1	1	0	2019	2019
Triple-Negative Breast Carcinoma	C4722518	BDNF	627	P23560	brain derived neurotrophic factor	Signaling	992	0.345	0.923	0.65626	0.03		1	3	0	2017	2019
Triple-Negative Breast Carcinoma	C4722518	BECN1	8678	Q14457	beclin 1	Enzyme modulator	373	0.432	0.846	0.93717	0.07		1	7	0	2012	2019
Triple-Negative Breast Carcinoma	C4722518	BHLHE40	8553	O14503	basic helix-loop-helix family member e40	Transcription factor	113	0.544	0.731	0.99444	0.01		1	1	0	2018	2018
Triple-Negative Breast Carcinoma	C4722518	BHLHE41	79365	Q9C0J9	basic helix-loop-helix family member e41	Transcription factor	63	0.623	0.577	0.99212	0.02		1	2	0	2012	2013
Triple-Negative Breast Carcinoma	C4722518	BID	637	P55957	BH3 interacting domain death agonist		117	0.555	0.808	1.5646e-11	0.01		1	1	0	2016	2016
Triple-Negative Breast Carcinoma	C4722518	BIRC2	329	Q13490	baculoviral IAP repeat containing 2	Enzyme modulator	125	0.535	0.731	0.42708	0.02		1	2	0	2016	2018
Triple-Negative Breast Carcinoma	C4722518	BIRC3	330	Q13489	baculoviral IAP repeat containing 3	Enzyme modulator	209	0.491	0.769	0.065597	0.02		1	2	0	2017	2019
Triple-Negative Breast Carcinoma	C4722518	BIRC5	332	O15392	baculoviral IAP repeat containing 5	Enzyme modulator	199	0.495	0.731	0.055854	0.02		1	2	0	2012	2014
Triple-Negative Breast Carcinoma	C4722518	BMI1	648	P35226	BMI1 proto-oncogene, polycomb ring finger		309	0.448	0.808	0.94286	0.02		0.5	2	0	2017	2019
Triple-Negative Breast Carcinoma	C4722518	BMS1	9790	Q14692	BMS1 ribosome biogenesis factor		192	0.499	0.846	0.0001753	0.01		1	1	0	2017	2017
Triple-Negative Breast Carcinoma	C4722518	BNIP3	664	Q12983	BCL2 interacting protein 3		158	0.52	0.731	1.9687e-05	0.01		1	1	0	2015	2015
Triple-Negative Breast Carcinoma	C4722518	BNIP3L	665	O60238	BCL2 interacting protein 3 like		63	0.636	0.654	0.15274	0.01		1	1	0	2020	2020
Triple-Negative Breast Carcinoma	C4722518	BRCA1	672	P38398	BRCA1 DNA repair associated	Enzyme	747	0.367	0.923	9.2157e-29	0.1		0.972	176	7	2008	2020
Triple-Negative Breast Carcinoma	C4722518	BRCA2	675	P51587	BRCA2 DNA repair associated	Nucleic acid binding	656	0.379	0.846	2.3581e-25	0.1		0.939	33	1	2008	2020
Triple-Negative Breast Carcinoma	C4722518	BRCC3	79184	P46736	BRCA1/BRCA2-containing complex subunit 3	Enzyme	33	0.686	0.5	0.0063932	0.01		1	1	0	2016	2016
Triple-Negative Breast Carcinoma	C4722518	BRD2	6046	P25440	bromodomain containing 2	Epigenetic regulator	303	0.45	0.808	0.99957	0.02		1	2	0	2018	2019
Triple-Negative Breast Carcinoma	C4722518	BRD3	8019	Q15059	bromodomain containing 3	Epigenetic regulator	42	0.7	0.5	0.97468	0.01		1	1	0	2018	2018
Triple-Negative Breast Carcinoma	C4722518	BRD4	23476	O60885	bromodomain containing 4	Epigenetic regulator	335	0.446	0.885	1	0.05		1	5	0	2017	2019
Triple-Negative Breast Carcinoma	C4722518	BRD7	29117	Q9NPI1	bromodomain containing 7	Epigenetic regulator	46	0.638	0.5	0.99774	0.01		1	1	0	2012	2012
Triple-Negative Breast Carcinoma	C4722518	BRD9	65980	Q9H8M2	bromodomain containing 9	Epigenetic regulator	23	0.729	0.308	0.015373	0.01		1	1	0	2019	2019
Triple-Negative Breast Carcinoma	C4722518	BRIP1	83990	Q9BX63	BRCA1 interacting protein C-terminal helicase 1	Enzyme	194	0.507	0.731	6.206e-17	0.01		1	1	1	2018	2018
Triple-Negative Breast Carcinoma	C4722518	BRMS1	25855	Q9HCU9	BRMS1 transcriptional repressor and anoikis regulator		72	0.597	0.615	1.579e-07	0.01		1	1	0	2015	2015
Triple-Negative Breast Carcinoma	C4722518	BRS3	680	P32247	bombesin receptor subtype 3	G-protein coupled receptor	261	0.474	0.846	0.94849	0.01		1	1	0	2014	2014
Triple-Negative Breast Carcinoma	C4722518	BSG	682	P35613	basigin (Ok blood group)		287	0.458	0.769	2.5873e-05	0.03		1	3	0	2018	2019
Triple-Negative Breast Carcinoma	C4722518	BTG2	7832	P78543	BTG anti-proliferation factor 2		77	0.587	0.538	0.019033	0.02		1	2	0	2016	2018
Triple-Negative Breast Carcinoma	C4722518	BTG3	10950	Q14201	BTG anti-proliferation factor 3		141	0.528	0.808	0.91582	0.01		1	1	0	2017	2017
Triple-Negative Breast Carcinoma	C4722518	BTG3-AS1	110806272		BTG3 antisense RNA 1		10	0.792	0.077		0.01		1	1	0	2017	2017
Triple-Negative Breast Carcinoma	C4722518	BTN3A2	11118	P78410	butyrophilin subfamily 3 member A2	Enzyme modulator	27	0.716	0.462	1.1002e-10	0.01		1	1	0	2020	2020
Triple-Negative Breast Carcinoma	C4722518	BTRC	8945	Q9Y297	beta-transducin repeat containing E3 ubiquitin protein ligase		75	0.601	0.731	0.011942	0.01		1	1	0	2015	2015
Triple-Negative Breast Carcinoma	C4722518	C16orf82	162083	Q7Z2V1	chromosome 16 open reading frame 82		18	0.743	0.346		0.02		1	2	0	2015	2018
Triple-Negative Breast Carcinoma	C4722518	C1D	10438	Q13901	C1D nuclear receptor corepressor	Transcription factor	33	0.67	0.462	0.03411	0.01		1	1	0	2019	2019
Triple-Negative Breast Carcinoma	C4722518	C1QBP	708	Q07021	complement C1q binding protein		111	0.569	0.692	2.0164e-07	0.02		1	2	0	2015	2018
Triple-Negative Breast Carcinoma	C4722518	CA9	768	Q16790	carbonic anhydrase 9		226	0.483	0.731	1.3027e-09	0.09		1	9	0	2012	2019
Triple-Negative Breast Carcinoma	C4722518	CAD	790	P27708	carbamoyl-phosphate synthetase 2, aspartate transcarbamylase, and dihydroorotase	Enzyme	249	0.482	0.846	0.99993	0.01		1	1	0	2020	2020
Triple-Negative Breast Carcinoma	C4722518	CADM1	23705	Q9BY67	cell adhesion molecule 1		205	0.491	0.769	0.66216	0.01		1	1	0	2019	2019
Triple-Negative Breast Carcinoma	C4722518	CADM4	199731	Q8NFZ8	cell adhesion molecule 4		27	0.716	0.5	0.99762	0.01		1	1	0	2019	2019
Triple-Negative Breast Carcinoma	C4722518	CALML3	810	P27482	calmodulin like 3	Calcium-binding protein	54	0.621	0.5	0.00090968	0.01		1	1	0	2020	2020
Triple-Negative Breast Carcinoma	C4722518	CALR	811	P27797	calreticulin	Calcium-binding protein	487	0.413	0.923	0.89133	0.01		1	1	0	2019	2019
Triple-Negative Breast Carcinoma	C4722518	CAPN1	823	P07384	calpain 1	Enzyme	165	0.539	0.808	5.8554e-10	0.02		1	2	0	2017	2017
Triple-Negative Breast Carcinoma	C4722518	CASP3	836	P42574	caspase 3	Enzyme	819	0.351	0.923	0.10017	0.06		1	6	0	2017	2019
Triple-Negative Breast Carcinoma	C4722518	CASP8	841	Q14790	caspase 8	Enzyme	480	0.404	0.923	3.7236e-06	0.02		1	2	0	2014	2016
Triple-Negative Breast Carcinoma	C4722518	CASP9	842	P55211	caspase 9	Enzyme	293	0.458	0.808	7.3826e-06	0.02		1	2	0	2019	2019
Triple-Negative Breast Carcinoma	C4722518	CASR	846	P41180	calcium sensing receptor	G-protein coupled receptor	517	0.41	0.846	0.046698	0.03		1	3	0	2018	2019
Triple-Negative Breast Carcinoma	C4722518	CASTOR3	352954	Q8NAP1	CASTOR family member 3		13	0.805	0.231	0.0096067	0.01		1	1	0	2019	2019
Triple-Negative Breast Carcinoma	C4722518	CAT	847	P04040	catalase	Enzyme	794	0.359	0.962	1.6263e-10	0.01		1	1	0	2018	2018
Triple-Negative Breast Carcinoma	C4722518	CAV1	857	Q03135	caveolin 1	Enzyme modulator	633	0.388	0.885	0.008274	0.02		1	2	0	2014	2017
Triple-Negative Breast Carcinoma	C4722518	CBLL2	158506	Q8N7E2	Cbl proto-oncogene like 2	Enzyme	235	0.476	0.808		0.03		1	3	0	2018	2020
Triple-Negative Breast Carcinoma	C4722518	CBX3	11335	Q13185	chromobox 3	Epigenetic regulator	53	0.633	0.346	0.40951	0.01		1	1	0	2019	2019
Triple-Negative Breast Carcinoma	C4722518	CCAT1	100507056		colon cancer associated transcript 1		82	0.585	0.5		0.01		1	1	0	2019	2019
Triple-Negative Breast Carcinoma	C4722518	CCDC54	84692	Q8NEL0	coiled-coil domain containing 54		43	0.659	0.5	1.1084e-10	0.01		1	1	0	2017	2017
Triple-Negative Breast Carcinoma	C4722518	CCK	885	P06307	cholecystokinin		326	0.453	0.846	3.3034e-05	0.06		1	6	0	2017	2019
Triple-Negative Breast Carcinoma	C4722518	CCL2	6347	P13500	C-C motif chemokine ligand 2	Signaling	1157	0.321	0.962	0.60786	0.02		1	2	0	2017	2018
Triple-Negative Breast Carcinoma	C4722518	CCL5	6352	P13501	C-C motif chemokine ligand 5	Signaling	514	0.403	0.885	0.0017516	0.06		1	6	0	2016	2019
Triple-Negative Breast Carcinoma	C4722518	CCN1	3491	O00622	cellular communication network factor 1	Signaling	246	0.473	0.731	0.71388	0.02		1	2	0	2016	2019
Triple-Negative Breast Carcinoma	C4722518	CCN5	8839	O76076	cellular communication network factor 5	Signaling	61	0.621	0.462	1.9682e-05	0.01		1	1	0	2015	2015
Triple-Negative Breast Carcinoma	C4722518	CCN6	8838	O95389	cellular communication network factor 6	Signaling	126	0.568	0.731	0.00061942	0.01		1	1	0	2018	2018
Triple-Negative Breast Carcinoma	C4722518	CCNB1	891	P14635	cyclin B1	Enzyme modulator	155	0.512	0.731	0.15993	0.02		1	2	0	2017	2017
Triple-Negative Breast Carcinoma	C4722518	CCND1	595	P24385	cyclin D1	Enzyme modulator	859	0.344	0.923	0.89057	0.07		1	7	0	2016	2019
Triple-Negative Breast Carcinoma	C4722518	CCND2	894	P30279	cyclin D2	Enzyme modulator	241	0.477	0.808	0.98658	0.01		1	1	0	2015	2015
Triple-Negative Breast Carcinoma	C4722518	CCNE1	898	P24864	cyclin E1	Enzyme modulator	133	0.538	0.731	0.97187	0.02		1	2	0	2019	2019
Triple-Negative Breast Carcinoma	C4722518	CCNE2	9134	O96020	cyclin E2	Enzyme modulator	59	0.608	0.538	0.86983	0.01		1	1	0	2017	2017
Triple-Negative Breast Carcinoma	C4722518	CCNG1	900	P51959	cyclin G1	Enzyme modulator	53	0.628	0.615	0.00073222	0.01		1	1	0	2017	2017
Triple-Negative Breast Carcinoma	C4722518	CCNG2	901	Q16589	cyclin G2	Enzyme modulator	59	0.615	0.577	0.0096861	0.01		1	1	0	2015	2015
Triple-Negative Breast Carcinoma	C4722518	CCR5	1234	P51681	C-C motif chemokine receptor 5 (gene/pseudogene)	G-protein coupled receptor	508	0.398	0.885	4.3094e-10	0.02		1	2	0	2017	2019
Triple-Negative Breast Carcinoma	C4722518	CCR7	1236	P32248	C-C motif chemokine receptor 7	G-protein coupled receptor	320	0.443	0.769	0.057623	0.04		1	4	0	2017	2019
Triple-Negative Breast Carcinoma	C4722518	CCS	9973	O14618	copper chaperone for superoxide dismutase	Enzyme	56	0.628	0.423	8.6291e-08	0.01		1	1	0	2019	2019
Triple-Negative Breast Carcinoma	C4722518	CCT3	7203	P49368	chaperonin containing TCP1 subunit 3	Chaperone	43	0.65	0.577	0.99998	0.01		1	1	0	2016	2016
Triple-Negative Breast Carcinoma	C4722518	CCT4	10575	P50991	chaperonin containing TCP1 subunit 4	Chaperone	42	0.65	0.5	0.99903	0.01		1	1	0	2016	2016
Triple-Negative Breast Carcinoma	C4722518	CD163	9332	Q86VB7	CD163 molecule	Enzyme	369	0.427	0.846	0.0008338	0.02		1	2	0	2018	2018
Triple-Negative Breast Carcinoma	C4722518	CD24	100133941	P25063	CD24 molecule		244	0.472	0.769		0.1		1	15	0	2012	2020
Triple-Negative Breast Carcinoma	C4722518	CD274	29126	Q9NZQ7	CD274 molecule	Receptor	1011	0.324	0.923	0.01916	0.1		0.987	77	0	2014	2020
Triple-Negative Breast Carcinoma	C4722518	CD44	960	P16070	CD44 molecule (Indian blood group)		711	0.363	0.962	2.4476e-07	0.1		1	28	1	2012	2020
Triple-Negative Breast Carcinoma	C4722518	CD47	961	Q08722	CD47 molecule		253	0.468	0.769	0.91924	0.03		1	3	0	2016	2019
Triple-Negative Breast Carcinoma	C4722518	CD5L	922	O43866	CD5 molecule like	Enzyme	78	0.593	0.846	4.2297e-17	0.01		1	1	0	2014	2014
Triple-Negative Breast Carcinoma	C4722518	CD68	968	P34810	CD68 molecule	Transporter	452	0.408	0.808	1.4063e-06	0.01		1	1	0	2018	2018
Triple-Negative Breast Carcinoma	C4722518	CD69	969	Q07108	CD69 molecule		206	0.488	0.923	0.029691	0.01		1	1	0	2014	2014
Triple-Negative Breast Carcinoma	C4722518	CD82	3732	P27701	CD82 molecule		172	0.507	0.731	1.2726e-08	0.01		1	1	0	2017	2017
Triple-Negative Breast Carcinoma	C4722518	CD8A	925	P01732	CD8a molecule		87	0.587	0.769	1.6806e-05	0.01		1	1	0	2018	2018
Triple-Negative Breast Carcinoma	C4722518	CDC20	991	Q12834	cell division cycle 20	Enzyme modulator	86	0.587	0.577	3.0001e-07	0.01		1	1	0	2014	2014
Triple-Negative Breast Carcinoma	C4722518	CDC25B	994	P30305	cell division cycle 25B	Enzyme	70	0.601	0.654	0.3643	0.01		1	1	0	2015	2015
Triple-Negative Breast Carcinoma	C4722518	CDC25C	995	P30307	cell division cycle 25C	Enzyme	95	0.576	0.769	4.1014e-13	0.02		1	2	0	2016	2018
Triple-Negative Breast Carcinoma	C4722518	CDC27	996	P30260	cell division cycle 27		26	0.729	0.308	0.99675	0.01		1	1	0	2015	2015
Triple-Negative Breast Carcinoma	C4722518	CDC37	11140	Q16543	cell division cycle 37	Enzyme modulator	30	0.695	0.5	0.90925	0.01		1	1	0	2018	2018
Triple-Negative Breast Carcinoma	C4722518	CDC42	998	P60953	cell division cycle 42	Enzyme modulator	327	0.458	0.846	0.78728	0.01		1	1	0	2017	2017
Triple-Negative Breast Carcinoma	C4722518	CDC7	8317	O00311	cell division cycle 7	Kinase	42	0.641	0.462	4.4296e-06	0.01		1	1	0	2019	2019
Triple-Negative Breast Carcinoma	C4722518	CDCA4	55038	Q9BXL8	cell division cycle associated 4	Transcription factor	5	0.839	0.077	0.083527	0.01		1	1	0	2019	2019
Triple-Negative Breast Carcinoma	C4722518	CDCA7	83879	Q9BWT1	cell division cycle associated 7		70	0.626	0.654	0.010816	0.01		1	1	0	2018	2018
Triple-Negative Breast Carcinoma	C4722518	CDCP1	64866	Q9H5V8	CUB domain containing protein 1		81	0.604	0.654	0.0001002	0.05		1	5	0	2016	2018
Triple-Negative Breast Carcinoma	C4722518	CDH1	999	P12830	cadherin 1		508	0.401	0.808	0.14631	0.09		1	9	0	2012	2019
Triple-Negative Breast Carcinoma	C4722518	CDH11	1009	P55287	cadherin 11		203	0.512	0.808	0.9999	0.01		1	1	0	2019	2019
Triple-Negative Breast Carcinoma	C4722518	CDH13	1012	P55290	cadherin 13		205	0.501	0.846	0.0007058	0.01		1	1	0	2015	2015
Triple-Negative Breast Carcinoma	C4722518	CDH2	1000	P19022	cadherin 2		135	0.535	0.731	0.99171	0.02		1	2	0	2016	2017
Triple-Negative Breast Carcinoma	C4722518	CDK1	983	P06493	cyclin dependent kinase 1	Kinase	214	0.482	0.808	0.99206	0.05		1	5	0	2014	2019
Triple-Negative Breast Carcinoma	C4722518	CDK11B	984	P21127	cyclin dependent kinase 11B	Kinase	26	0.711	0.462	6.4813e-05	0.01		1	1	0	2015	2015
Triple-Negative Breast Carcinoma	C4722518	CDK12	51755	Q9NYV4	cyclin dependent kinase 12	Kinase	54	0.638	0.462	1	0.02		1	2	0	2016	2019
Triple-Negative Breast Carcinoma	C4722518	CDK13	8621	Q14004	cyclin dependent kinase 13	Kinase	141	0.606	0.692	0.90753	0.01		1	1	0	2019	2019
Triple-Negative Breast Carcinoma	C4722518	CDK19	23097	Q9BWU1	cyclin dependent kinase 19	Kinase	34	0.691	0.462	0.99982	0.01		1	1	0	2015	2015
Triple-Negative Breast Carcinoma	C4722518	CDK2	1017	P24941	cyclin dependent kinase 2	Kinase	270	0.456	0.692	0.61054	0.04		1	4	0	2017	2018
Triple-Negative Breast Carcinoma	C4722518	CDK4	1019	P11802	cyclin dependent kinase 4	Kinase	433	0.412	0.808	0.062909	0.1		0.929	14	0	2012	2019
Triple-Negative Breast Carcinoma	C4722518	CDK6	1021	Q00534	cyclin dependent kinase 6	Kinase	266	0.471	0.731	0.98315	0.01		1	1	0	2019	2019
Triple-Negative Breast Carcinoma	C4722518	CDK7	1022	P50613	cyclin dependent kinase 7	Kinase	89	0.566	0.731	4.4725e-07	0.02		1	2	0	2015	2017
Triple-Negative Breast Carcinoma	C4722518	CDK8	1024	P49336	cyclin dependent kinase 8	Kinase	82	0.597	0.654	0.40964	0.01		1	1	0	2019	2019
Triple-Negative Breast Carcinoma	C4722518	CDK9	1025	P50750	cyclin dependent kinase 9	Kinase	204	0.498	0.769	8.893e-05	0.02		1	2	0	2018	2019
Triple-Negative Breast Carcinoma	C4722518	CDKN1B	1027	P46527	cyclin dependent kinase inhibitor 1B		454	0.409	0.769	0.62376	0.03		0.667	3	0	2015	2019
Triple-Negative Breast Carcinoma	C4722518	CDKN1C	1028	P49918	cyclin dependent kinase inhibitor 1C		298	0.456	0.846	0.81963	0.01		1	1	0	2018	2018
Triple-Negative Breast Carcinoma	C4722518	CDKN2A	1029	P42771;Q8N726	cyclin dependent kinase inhibitor 2A		1314	0.3	0.885	0.39474	0.06		1	6	0	2014	2019
Triple-Negative Breast Carcinoma	C4722518	CDKN2B	1030	P42772	cyclin dependent kinase inhibitor 2B		440	0.417	0.769	0.0073369	0.01		1	1	0	2018	2018
Triple-Negative Breast Carcinoma	C4722518	CDR1-AS	103611090		CDR1 antisense RNA		51	0.623	0.654		0.02		1	2	0	2018	2020
Triple-Negative Breast Carcinoma	C4722518	CEACAM5	1048	P06731	CEA cell adhesion molecule 5		428	0.42	0.846	4.1625e-10	0.01		1	1	0	2019	2019
Triple-Negative Breast Carcinoma	C4722518	CEBPB	1051	P17676	CCAAT enhancer binding protein beta	Transcription factor	182	0.508	0.731	0.35809	0.02		1	2	0	2018	2018
Triple-Negative Breast Carcinoma	C4722518	CEMIP	57214	Q8WUJ3	cell migration inducing hyaluronidase 1		64	0.617	0.615	4.4023e-17	0.01		1	1	0	2020	2020
Triple-Negative Breast Carcinoma	C4722518	CENPA	1058	P49450	centromere protein A		34	0.678	0.385	0.011536	0.01		1	1	0	2014	2014
Triple-Negative Breast Carcinoma	C4722518	CENPK	64105	Q9BS16	centromere protein K		19	0.743	0.423	3.0771e-11	0.01		1	1	0	2013	2013
Triple-Negative Breast Carcinoma	C4722518	CENPU	79682	Q71F23	centromere protein U		28	0.695	0.346	5.7948e-08	0.01		1	1	0	2019	2019
Triple-Negative Breast Carcinoma	C4722518	CERNA2	642934		competing endogenous lncRNA 2 for microRNA let-7b		24	0.705	0.269		0.01		1	1	0	2019	2019
Triple-Negative Breast Carcinoma	C4722518	CFB	629	P00751	complement factor B		139	0.532	0.769	4.6696e-16	0.01		1	1	0	2019	2019
Triple-Negative Breast Carcinoma	C4722518	CFI	3426	P05156	complement factor I		133	0.569	0.731	3.5432e-08	0.01		1	1	0	2018	2018
Triple-Negative Breast Carcinoma	C4722518	CFL1	1072	P23528	cofilin 1		153	0.529	0.769	0.55563	0.01		1	1	0	2017	2017
Triple-Negative Breast Carcinoma	C4722518	CHD4	1108	Q14839	chromodomain helicase DNA binding protein 4		94	0.593	0.654	1	0.02		1	2	0	2018	2019
Triple-Negative Breast Carcinoma	C4722518	CHEK1	1111	O14757	checkpoint kinase 1	Kinase	195	0.492	0.808	3.14e-08	0.1		0.917	12	0	2011	2019
Triple-Negative Breast Carcinoma	C4722518	CHEK2	11200	O96017	checkpoint kinase 2	Kinase	297	0.46	0.808	1.2103e-24	0.05		1	5	1	2015	2018
Triple-Negative Breast Carcinoma	C4722518	CHGB	1114	P05060	chromogranin B		70	0.599	0.654	2.3622e-07	0.01		1	1	0	2018	2018
Triple-Negative Breast Carcinoma	C4722518	CHI3L1	1116	P36222	chitinase 3 like 1		420	0.419	0.885	1.1133e-05	0.01		1	1	0	2018	2018
Triple-Negative Breast Carcinoma	C4722518	CHMP2B	25978	Q9UQN3	charged multivesicular body protein 2B		177	0.543	0.731	4.6203e-06	0.01		1	1	0	2019	2019
Triple-Negative Breast Carcinoma	C4722518	CHMP3	51652	Q9Y3E7	charged multivesicular body protein 3		14	0.792	0.231	0.0040006	0.01		1	1	0	2020	2020
Triple-Negative Breast Carcinoma	C4722518	CHPT1	56994	Q8WUD6	choline phosphotransferase 1	Enzyme	253	0.474	0.846	0.00024252	0.02		1	2	0	2018	2018
Triple-Negative Breast Carcinoma	C4722518	CHRNA4	1137	P43681	cholinergic receptor nicotinic alpha 4 subunit	Ion channel	248	0.492	0.808	8.5474e-05	0.01		1	1	0	2017	2017
Triple-Negative Breast Carcinoma	C4722518	CHST9	83539	Q7L1S5	carbohydrate sulfotransferase 9	Enzyme	22	0.729	0.308	6.9512e-09	0.01		1	1	1	2017	2017
Triple-Negative Breast Carcinoma	C4722518	CHUK	1147	O15111	component of inhibitor of nuclear factor kappa B kinase complex	Kinase	125	0.556	0.731	0.99403	0.01		1	1	0	2018	2018
Triple-Negative Breast Carcinoma	C4722518	CIB1	10519	Q99828	calcium and integrin binding 1		275	0.458	0.769	0.00032612	0.03		0.667	3	0	2015	2019
Triple-Negative Breast Carcinoma	C4722518	CILK1	22858	Q9UPZ9	ciliogenesis associated kinase 1	Kinase	142	0.545	0.808	1.3376e-05	0.02		1	2	0	2015	2019
Triple-Negative Breast Carcinoma	C4722518	CIP2A	57650	Q8TCG1	cellular inhibitor of PP2A		141	0.524	0.808	1.3591e-13	0.04		1	4	0	2013	2019
Triple-Negative Breast Carcinoma	C4722518	CKAP4	10970	Q07065	cytoskeleton associated protein 4		332	0.436	0.731	0.50863	0.02		1	2	0	2011	2012
Triple-Negative Breast Carcinoma	C4722518	CLDN1	9076	O95832	claudin 1	Cell-cell junction	234	0.481	0.808	0.0010103	0.02		1	2	0	2014	2017
Triple-Negative Breast Carcinoma	C4722518	CLDN3	1365	O15551	claudin 3	Cell-cell junction	108	0.558	0.615	0.52233	0.03		1	3	0	2017	2018
Triple-Negative Breast Carcinoma	C4722518	CLDN6	9074	P56747	claudin 6	Cell-cell junction	42	0.656	0.5	0.0040357	0.01		1	1	0	2018	2018
Triple-Negative Breast Carcinoma	C4722518	CLDN7	1366	O95471	claudin 7	Cell-cell junction	192	0.494	0.808	0.0028828	0.01		1	1	0	2017	2017
Triple-Negative Breast Carcinoma	C4722518	CLEC2D	29121	Q9UHP7	C-type lectin domain family 2 member D		21	0.736	0.308	0.23009	0.01		1	1	0	2018	2018
Triple-Negative Breast Carcinoma	C4722518	CLK1	1195	P49759	CDC like kinase 1	Kinase	15	0.769	0.423	7.5962e-07	0.01		1	1	0	2018	2018
Triple-Negative Breast Carcinoma	C4722518	CLK2	1196	P49760	CDC like kinase 2	Kinase	27	0.691	0.462	0.99997	0.03		1	3	0	2017	2019
Triple-Negative Breast Carcinoma	C4722518	CLTA	1211	P09496	clathrin light chain A	Transporter	55	0.628	0.654	0.96319	0.01		1	1	0	2020	2020
Triple-Negative Breast Carcinoma	C4722518	CLU	1191	P10909	clusterin		412	0.426	0.885	7.8072e-05	0.01		1	1	0	2012	2012
Triple-Negative Breast Carcinoma	C4722518	CMA1	1215	P23946	chymase 1	Enzyme	157	0.514	0.692	7.5861e-09	0.02		1	2	0	2018	2019
Triple-Negative Breast Carcinoma	C4722518	CMPK1	51727	P30085	cytidine/uridine monophosphate kinase 1	Kinase	55	0.626	0.577	0.84789	0.01		1	1	0	2016	2016
Triple-Negative Breast Carcinoma	C4722518	CNOT9	9125	Q92600	CCR4-NOT transcription complex subunit 9		12	0.769	0.192	0.98565	0.01		1	1	0	2019	2019
Triple-Negative Breast Carcinoma	C4722518	CNR2	1269	P34972	cannabinoid receptor 2	G-protein coupled receptor	197	0.509	0.846	6.5369e-06	0.01		1	1	0	2018	2018
Triple-Negative Breast Carcinoma	C4722518	COL11A2	1302	P13942	collagen type XI alpha 2 chain		399	0.435	0.846	0.70197	0.1		1	27	0	2010	2019
Triple-Negative Breast Carcinoma	C4722518	COL18A1	80781	P39060	collagen type XVIII alpha 1 chain		323	0.449	0.808	1.7414e-10	0.01		1	1	0	2014	2014
Triple-Negative Breast Carcinoma	C4722518	COL4A2	1284	P08572	collagen type IV alpha 2 chain		131	0.563	0.654	3.5842e-15	0.01		1	1	0	2017	2017
Triple-Negative Breast Carcinoma	C4722518	COL9A1	1297	P20849	collagen type IX alpha 1 chain		116	0.566	0.731	3.0742e-19	0.01		1	1	0	2017	2017
Triple-Negative Breast Carcinoma	C4722518	COL9A2	1298	Q14055	collagen type IX alpha 2 chain		116	0.572	0.769	1.0453e-08	0.01		1	1	0	2017	2017
Triple-Negative Breast Carcinoma	C4722518	COL9A3	1299	Q14050	collagen type IX alpha 3 chain		125	0.569	0.769	3.278e-12	0.01		1	1	0	2017	2017
Triple-Negative Breast Carcinoma	C4722518	COMP	1311	P49747	cartilage oligomeric matrix protein		230	0.503	0.808	1.3462e-09	0.01		1	1	0	2017	2017
Triple-Negative Breast Carcinoma	C4722518	COMT	1312	P21964	catechol-O-methyltransferase	Enzyme	622	0.4	0.923	1.1377e-06	0.01		1	1	0	2019	2019
Triple-Negative Breast Carcinoma	C4722518	COPS5	10987	Q92905	COP9 signalosome subunit 5	Enzyme	101	0.566	0.769	0.99925	0.01		1	1	0	2019	2019
Triple-Negative Breast Carcinoma	C4722518	CORO1C	23603	Q9ULV4	coronin 1C	Cellular structure	40	0.663	0.423	0.99813	0.01		1	1	0	2014	2014
Triple-Negative Breast Carcinoma	C4722518	COTL1	23406	Q14019	coactosin like F-actin binding protein 1	Cellular structure	62	0.615	0.538	0.039077	0.01		1	1	0	2020	2020
Triple-Negative Breast Carcinoma	C4722518	CP	1356	P00450	ceruloplasmin	Enzyme	283	0.466	0.846	4.2013e-10	0.01		0	1	0	2017	2017
Triple-Negative Breast Carcinoma	C4722518	CPA4	51200	Q9UI42	carboxypeptidase A4	Enzyme	49	0.633	0.5	9.3852e-18	0.01		1	1	0	2019	2019
Triple-Negative Breast Carcinoma	C4722518	CPEB2	132864	Q7Z5Q1	cytoplasmic polyadenylation element binding protein 2	Nucleic acid binding	13	0.805	0.192	0.00013675	0.02		1	2	0	2015	2019
Triple-Negative Breast Carcinoma	C4722518	CRABP1	1381	P29762	cellular retinoic acid binding protein 1		53	0.631	0.615	0.0058779	0.01		1	1	0	2015	2015
Triple-Negative Breast Carcinoma	C4722518	CRAMP1	57585	Q96RY5	cramped chromatin regulator homolog 1		12	0.805	0.308	0.050239	0.01		1	1	0	2018	2018
Triple-Negative Breast Carcinoma	C4722518	CRB3	92359	Q9BUF7	crumbs cell polarity complex component 3		24	0.716	0.308	0.35784	0.01		1	1	0	2019	2019
Triple-Negative Breast Carcinoma	C4722518	CREB3L1	90993	Q96BA8	cAMP responsive element binding protein 3 like 1		88	0.601	0.615	0.98488	0.01		1	1	0	2018	2018
Triple-Negative Breast Carcinoma	C4722518	CREBBP	1387	Q92793	CREB binding protein		438	0.428	0.808	1	0.02		1	2	0	2019	2019
Triple-Negative Breast Carcinoma	C4722518	CRISP2	7180	P16562	cysteine rich secretory protein 2	Immune response	168	0.512	0.769	1.4437e-12	0.01		1	1	0	2015	2015
Triple-Negative Breast Carcinoma	C4722518	CRK	1398	P46108	CRK proto-oncogene, adaptor protein		544	0.394	0.923	0.95936	0.03		1	3	0	2018	2019
Triple-Negative Breast Carcinoma	C4722518	CRMP1	1400	Q14194	collapsin response mediator protein 1	Enzyme	148	0.525	0.808	0.99173	0.01		1	1	0	2019	2019
Triple-Negative Breast Carcinoma	C4722518	CRTC1	23373	Q6UUV9	CREB regulated transcription coactivator 1	Transcription factor	115	0.565	0.692	0.531	0.01		1	1	0	2016	2016
Triple-Negative Breast Carcinoma	C4722518	CRYAB	1410	P02511	crystallin alpha B		200	0.515	0.731	0.02247	0.01		1	1	0	2013	2013
Triple-Negative Breast Carcinoma	C4722518	CRYZ	1429	Q08257	crystallin zeta		145	0.524	0.731	5.6616e-23	0.01		1	1	0	2018	2018
Triple-Negative Breast Carcinoma	C4722518	CSPG4	1464	Q6UVK1	chondroitin sulfate proteoglycan 4		75	0.599	0.615	2.6212e-05	0.04		1	4	0	2015	2018
Triple-Negative Breast Carcinoma	C4722518	CSRP3	8048	P50461	cysteine and glycine rich protein 3	Cellular structure	108	0.572	0.731	0.00015859	0.01		1	1	0	2020	2020
Triple-Negative Breast Carcinoma	C4722518	CT83	203413	Q5H943	cancer/testis antigen 83		24	0.722	0.269	0.083699	0.01		1	1	0	2015	2015
Triple-Negative Breast Carcinoma	C4722518	CTAG1A	246100	P78358	cancer/testis antigen 1A		161	0.508	0.731		0.01		1	1	0	2018	2018
Triple-Negative Breast Carcinoma	C4722518	CTAG1B	1485	P78358	cancer/testis antigen 1B		166	0.507	0.731		0.01		1	1	0	2018	2018
Triple-Negative Breast Carcinoma	C4722518	CTLA4	1493	P16410	cytotoxic T-lymphocyte associated protein 4		722	0.369	0.923	0.94085	0.05		1	5	0	2017	2018
Triple-Negative Breast Carcinoma	C4722518	CTNNB1	1499	P35222	catenin beta 1		1368	0.303	0.885	0.99999	0.1		1	40	0	2012	2019
Triple-Negative Breast Carcinoma	C4722518	CTNND1	1500	O60716	catenin delta 1	Cellular structure	196	0.5	0.808	0.99999	0.01		1	1	0	2017	2017
Triple-Negative Breast Carcinoma	C4722518	CTSB	1508	P07858	cathepsin B	Enzyme	304	0.457	0.846	5.8819e-11	0.02		1	2	0	2016	2017
Triple-Negative Breast Carcinoma	C4722518	CTSD	1509	P07339	cathepsin D	Enzyme	242	0.478	0.846	0.00091747	0.01		1	1	0	2019	2019
Triple-Negative Breast Carcinoma	C4722518	CTSS	1520	P25774	cathepsin S	Enzyme	131	0.539	0.731	0.34178	0.03		1	3	0	2017	2019
Triple-Negative Breast Carcinoma	C4722518	CUL1	8454	Q13616	cullin 1	Enzyme	58	0.617	0.615	1	0.02		1	2	0	2016	2019
Triple-Negative Breast Carcinoma	C4722518	CUX1	1523	P39880;Q13948	cut like homeobox 1	Transcription factor	283	0.465	0.846	1	0.01		1	1	0	2019	2019
Triple-Negative Breast Carcinoma	C4722518	CXADR	1525	P78310	CXADR Ig-like cell adhesion molecule		305	0.454	0.885	0.36867	0.03		1	3	0	2018	2019
Triple-Negative Breast Carcinoma	C4722518	CXADRP1	653108		CXADR pseudogene 1		272	0.463	0.846		0.03		1	3	0	2018	2019
Triple-Negative Breast Carcinoma	C4722518	CXCL1	2919	P09341	C-X-C motif chemokine ligand 1	Signaling	315	0.449	0.923	0.11845	0.02		1	2	0	2017	2018
Triple-Negative Breast Carcinoma	C4722518	CXCL10	3627	P02778	C-X-C motif chemokine ligand 10	Signaling	631	0.378	0.885	0.36865	0.01		1	1	0	2019	2019
Triple-Negative Breast Carcinoma	C4722518	CXCL12	6387	P48061	C-X-C motif chemokine ligand 12		626	0.379	0.846	0.11851	0.02		1	2	1	2018	2019
Triple-Negative Breast Carcinoma	C4722518	CXCL13	10563	O43927	C-X-C motif chemokine ligand 13	Signaling	246	0.472	0.731	0.82566	0.01		1	1	0	2018	2018
Triple-Negative Breast Carcinoma	C4722518	CXCL5	6374	P42830	C-X-C motif chemokine ligand 5	Signaling	160	0.519	0.769	5.0431e-06	0.01		1	1	0	2017	2017
Triple-Negative Breast Carcinoma	C4722518	CXCL8	3576	P10145	C-X-C motif chemokine ligand 8	Signaling	1254	0.31	0.962	0.00027377	0.09		1	9	0	2013	2019
Triple-Negative Breast Carcinoma	C4722518	CXCL9	4283	Q07325	C-X-C motif chemokine ligand 9	Signaling	269	0.462	0.808	0.0029304	0.01		1	1	0	2019	2019
Triple-Negative Breast Carcinoma	C4722518	CXCR2	3579	P25025	C-X-C motif chemokine receptor 2	G-protein coupled receptor	335	0.445	0.923	0.013736	0.01		1	1	0	2018	2018
Triple-Negative Breast Carcinoma	C4722518	CXCR4	7852	P61073	C-X-C motif chemokine receptor 4	G-protein coupled receptor	739	0.362	0.923	0.017804	0.1		1	15	2	2010	2019
Triple-Negative Breast Carcinoma	C4722518	CXCR6	10663	O00574	C-X-C motif chemokine receptor 6	G-protein coupled receptor	325	0.448	0.885	5.7212e-05	0.01		1	1	0	2014	2014
Triple-Negative Breast Carcinoma	C4722518	CYBB	1536	P04839	cytochrome b-245 beta chain	Ion channel	343	0.452	0.885	0.99904	0.01		1	1	0	2019	2019
Triple-Negative Breast Carcinoma	C4722518	CYGB	114757	Q8WWM9	cytoglobin		88	0.579	0.577	0.10249	0.01		1	1	0	2019	2019
Triple-Negative Breast Carcinoma	C4722518	CYLD	1540	Q9NQC7	CYLD lysine 63 deubiquitinase	Enzyme	211	0.498	0.846	0.99993	0.01		1	1	0	2017	2017
Triple-Negative Breast Carcinoma	C4722518	CYP19A1	1588	P11511	cytochrome P450 family 19 subfamily A member 1	Enzyme	519	0.41	0.885	1.7022e-05	0.01		1	1	0	2017	2017
Triple-Negative Breast Carcinoma	C4722518	CYP24A1	1591	Q07973	cytochrome P450 family 24 subfamily A member 1	Enzyme	171	0.518	0.692	3.1964e-23	0.01		1	1	0	2015	2015
Triple-Negative Breast Carcinoma	C4722518	CYP2C19	1557	P33261	cytochrome P450 family 2 subfamily C member 19		274	0.467	0.846	6.4882e-20	0.01		1	1	0	2014	2014
Triple-Negative Breast Carcinoma	C4722518	CYP7B1	9420	O75881	cytochrome P450 family 7 subfamily B member 1	Enzyme	141	0.563	0.692	3.2954e-06	0.01		1	1	0	2019	2019
Triple-Negative Breast Carcinoma	C4722518	CYTB	4519	P00156	cytochrome b		166	0.529	0.808		0.01		1	1	0	2017	2017
Triple-Negative Breast Carcinoma	C4722518	CYTOR	112597		cytoskeleton regulator RNA		90	0.568	0.577		0.02		1	2	0	2018	2019
Triple-Negative Breast Carcinoma	C4722518	DAAM1	23002	Q9Y4D1	dishevelled associated activator of morphogenesis 1		29	0.682	0.423	0.99918	0.01		1	1	0	2018	2018
Triple-Negative Breast Carcinoma	C4722518	DANCR	57291	P0C864	differentiation antagonizing non-protein coding RNA		65	0.601	0.615		0.04		1	4	0	2017	2019
Triple-Negative Breast Carcinoma	C4722518	DAP	1611	P51397	death associated protein	Enzyme modulator	144	0.53	0.808	0.0035018	0.01		1	1	0	2015	2015
Triple-Negative Breast Carcinoma	C4722518	DAPK2	23604	Q9UIK4	death associated protein kinase 2	Kinase	130	0.536	0.692	5.0088e-10	0.01		1	1	0	2019	2019
Triple-Negative Breast Carcinoma	C4722518	DAXX	1616	Q9UER7	death domain associated protein		137	0.544	0.692	0.098633	0.01		1	1	0	2019	2019
Triple-Negative Breast Carcinoma	C4722518	DBP	1628	Q10586	D-box binding PAR bZIP transcription factor	Nucleic acid binding	105	0.556	0.731	0.23376	0.01		1	1	0	2017	2017
Triple-Negative Breast Carcinoma	C4722518	DCDC2	51473	Q9UHG0	doublecortin domain containing 2		128	0.546	0.769	5.6611e-10	0.01		1	1	0	2019	2019
Triple-Negative Breast Carcinoma	C4722518	DCLK3	85443	Q9C098	doublecortin like kinase 3	Kinase	47	0.647	0.615	0.13686	0.01		1	1	0	2018	2018
Triple-Negative Breast Carcinoma	C4722518	DCN	1634	P07585	decorin		297	0.457	0.808	0.31231	0.01		1	1	0	2018	2018
Triple-Negative Breast Carcinoma	C4722518	DCTN4	51164	Q9UJW0	dynactin subunit 4		253	0.472	0.846	0.73221	0.01		1	1	0	2012	2012
Triple-Negative Breast Carcinoma	C4722518	DCTN6	10671	O00399	dynactin subunit 6	Cellular structure	315	0.442	0.769	0.055741	0.04		1	4	0	2014	2019
Triple-Negative Breast Carcinoma	C4722518	DDB2	1643	Q92466	damage specific DNA binding protein 2	Nucleic acid binding	118	0.576	0.654	7.397e-06	0.01		1	1	0	2019	2019
Triple-Negative Breast Carcinoma	C4722518	DDR1	780	Q08345	discoidin domain receptor tyrosine kinase 1	Kinase	195	0.497	0.808	4.6331e-06	0.03		0.667	3	0	2015	2019
Triple-Negative Breast Carcinoma	C4722518	DDR2	4921	Q16832	discoidin domain receptor tyrosine kinase 2	Kinase	147	0.541	0.769	0.5503	0.01		1	1	0	2015	2015
Triple-Negative Breast Carcinoma	C4722518	DDX5	1655	P17844	DEAD-box helicase 5		77	0.592	0.692	0.99998	0.01		1	1	0	2019	2019
Triple-Negative Breast Carcinoma	C4722518	DEDD	9191	O75618	death effector domain containing		24	0.711	0.346	0.95912	0.01		1	1	0	2019	2019
Triple-Negative Breast Carcinoma	C4722518	DEK	7913	P35659	DEK proto-oncogene		122	0.542	0.769	0.13065	0.01		1	1	0	2017	2017
Triple-Negative Breast Carcinoma	C4722518	DENR	8562	O43583	density regulated re-initiation and release factor	Enzyme	121	0.543	0.692	0.87514	0.01		1	1	0	2019	2019
Triple-Negative Breast Carcinoma	C4722518	DEPDC1	55635	Q5TB30	DEP domain containing 1	Nucleic acid binding	38	0.67	0.577	7.635e-10	0.02		1	2	0	2017	2019
Triple-Negative Breast Carcinoma	C4722518	DHCR24	1718	Q15392	24-dehydrocholesterol reductase	Enzyme	216	0.498	0.769	0.031029	0.01		1	1	0	2019	2019
Triple-Negative Breast Carcinoma	C4722518	DHDDS	79947	Q86SQ9	dehydrodolichyl diphosphate synthase subunit	Enzyme	308	0.468	0.885	0.24533	0.02		1	2	0	2018	2018
Triple-Negative Breast Carcinoma	C4722518	DHODH	1723	Q02127	dihydroorotate dehydrogenase (quinone)	Enzyme	100	0.576	0.769	0.0029884	0.01		1	1	0	2017	2017
Triple-Negative Breast Carcinoma	C4722518	DHRS3	9249	O75911	dehydrogenase/reductase 3		18	0.751	0.423	0.22581	0.01		1	1	0	2018	2018
Triple-Negative Breast Carcinoma	C4722518	DHX37	57647	Q8IY37	DEAH-box helicase 37	Enzyme	13	0.792	0.385	0.99252	0.01		1	1	0	2019	2019
Triple-Negative Breast Carcinoma	C4722518	DHX40	79665	Q8IX18	DEAH-box helicase 40	Enzyme	64	0.608	0.769	0.7556	0.01		1	1	0	2015	2015
Triple-Negative Breast Carcinoma	C4722518	DIABLO	56616	Q9NR28	diablo IAP-binding mitochondrial protein		108	0.555	0.692	2.5722e-06	0.01		1	1	0	2017	2017
Triple-Negative Breast Carcinoma	C4722518	DIAPH3	81624	Q9NSV4	diaphanous related formin 3		44	0.656	0.462	1.9877e-15	0.01		1	1	0	2017	2017
Triple-Negative Breast Carcinoma	C4722518	DICER1	23405	Q9UPY3	dicer 1, ribonuclease III	Enzyme	302	0.446	0.846	1	0.01		1	1	0	2016	2016
Triple-Negative Breast Carcinoma	C4722518	DKK1	22943	O94907	dickkopf WNT signaling pathway inhibitor 1		372	0.439	0.885	0.17423	0.01		1	1	0	2012	2012
Triple-Negative Breast Carcinoma	C4722518	DKK2	27123	Q9UBU2	dickkopf WNT signaling pathway inhibitor 2		74	0.599	0.692	0.75318	0.01		1	1	0	2018	2018
Triple-Negative Breast Carcinoma	C4722518	DLK2	65989	Q6UY11	delta like non-canonical Notch ligand 2		13	0.821	0.154	0.77915	0.01		1	1	0	2019	2019
Triple-Negative Breast Carcinoma	C4722518	DLL4	54567	Q9NR61	delta like canonical Notch ligand 4		219	0.494	0.769	0.99982	0.01		1	1	0	2019	2019
Triple-Negative Breast Carcinoma	C4722518	DMRT1	1761	Q9Y5R6	doublesex and mab-3 related transcription factor 1		101	0.559	0.654	0.7387	0.01		1	1	0	2019	2019
Triple-Negative Breast Carcinoma	C4722518	DNER	92737	Q8NFT8	delta/notch like EGF repeat containing		203	0.493	0.769	0.1859	0.09		1	9	0	2016	2019
Triple-Negative Breast Carcinoma	C4722518	DNM1L	10059	O00429	dynamin 1 like	Enzyme modulator	273	0.475	0.808	0.00056753	0.01		1	1	0	2019	2019
Triple-Negative Breast Carcinoma	C4722518	DNMT1	1786	P26358	DNA methyltransferase 1	Epigenetic regulator	496	0.406	0.885	1	0.09		1	9	2	2014	2018
Triple-Negative Breast Carcinoma	C4722518	DNMT3A	1788	Q9Y6K1	DNA methyltransferase 3 alpha		350	0.445	0.846	7.3538e-39	0.01		1	1	0	2018	2018
Triple-Negative Breast Carcinoma	C4722518	DOCK1	1793	Q14185	dedicator of cytokinesis 1		58	0.641	0.577	0.0068117	0.02		1	2	0	2018	2019
Triple-Negative Breast Carcinoma	C4722518	DOK1	1796	Q99704	docking protein 1		45	0.65	0.538	0.029002	0.01		1	1	0	2014	2014
Triple-Negative Breast Carcinoma	C4722518	DOT1L	84444	Q8TEK3	DOT1 like histone lysine methyltransferase	Epigenetic regulator	79	0.599	0.692	1	0.01		1	1	0	2019	2019
Triple-Negative Breast Carcinoma	C4722518	DPYD	1806	Q12882	dihydropyrimidine dehydrogenase	Enzyme	249	0.493	0.846	3.3686e-22	0.01		1	1	0	2013	2013
Triple-Negative Breast Carcinoma	C4722518	DSC1	1823	Q08554	desmocollin 1	Cell adhesion	32	0.695	0.385	3.4979e-16	0.01		1	1	0	2019	2019
Triple-Negative Breast Carcinoma	C4722518	DUSP1	1843	P28562	dual specificity phosphatase 1		214	0.491	0.808	0.010151	0.01		1	1	0	2018	2018
Triple-Negative Breast Carcinoma	C4722518	DUSP4	1846	Q13115	dual specificity phosphatase 4		68	0.603	0.654	0.88152	0.03		1	3	0	2014	2016
Triple-Negative Breast Carcinoma	C4722518	DUSP6	1848	Q16828	dual specificity phosphatase 6		196	0.511	0.846	0.97603	0.01		1	1	0	2019	2019
Triple-Negative Breast Carcinoma	C4722518	DVL1	1855	O14640	dishevelled segment polarity protein 1	Signaling	181	0.531	0.769	3.7313e-06	0.01		1	1	0	2019	2019
Triple-Negative Breast Carcinoma	C4722518	DVL1P1	8215	P54792	dishevelled segment polarity protein 1 pseudogene 1	Signaling	29	0.716	0.423		0.01		1	1	0	2019	2019
Triple-Negative Breast Carcinoma	C4722518	DYRK2	8445	Q92630	dual specificity tyrosine phosphorylation regulated kinase 2	Kinase	35	0.67	0.346	0.99751	0.01		1	1	0	2019	2019
Triple-Negative Breast Carcinoma	C4722518	E2F1	1869	Q01094	E2F transcription factor 1	Nucleic acid binding	324	0.441	0.846	0.9877	0.02		1	2	0	2015	2017
Triple-Negative Breast Carcinoma	C4722518	E2F2	1870	Q14209	E2F transcription factor 2	Nucleic acid binding	75	0.599	0.692	0.25505	0.01		1	1	0	2018	2018
Triple-Negative Breast Carcinoma	C4722518	E2F6	1876	O75461	E2F transcription factor 6	Nucleic acid binding	35	0.67	0.385	0.10158	0.01		1	1	0	2014	2014
Triple-Negative Breast Carcinoma	C4722518	EBI3	10148	Q14213	Epstein-Barr virus induced 3	Signaling	233	0.474	0.808	0.10797	0.01		1	1	0	2018	2018
Triple-Negative Breast Carcinoma	C4722518	ECT2	1894	Q9H8V3	epithelial cell transforming 2		65	0.603	0.615	8.0837e-10	0.01		1	1	0	2019	2019
Triple-Negative Breast Carcinoma	C4722518	EDIL3	10085	O43854	EGF like repeats and discoidin domains 3	Enzyme	104	0.564	0.769	0.00014584	0.02		1	2	0	2018	2019
Triple-Negative Breast Carcinoma	C4722518	EDN1	1906	P05305	endothelin 1	Signaling	679	0.38	0.846	0.45504	0.01		1	1	0	2011	2011
Triple-Negative Breast Carcinoma	C4722518	EDNRA	1909	P25101	endothelin receptor type A	G-protein coupled receptor	427	0.426	0.885	0.99158	0.01		1	1	0	2014	2014
Triple-Negative Breast Carcinoma	C4722518	EEF1A2	1917	Q05639	eukaryotic translation elongation factor 1 alpha 2	Enzyme	166	0.554	0.808	0.99558	0.01		1	1	0	2019	2019
Triple-Negative Breast Carcinoma	C4722518	EEF2K	29904	O00418	eukaryotic elongation factor 2 kinase	Kinase	52	0.641	0.385	8.3628e-20	0.05		1	5	0	2014	2018
Triple-Negative Breast Carcinoma	C4722518	EFEMP1	2202	Q12805	EGF containing fibulin extracellular matrix protein 1	Extracellular structure	153	0.54	0.769	0.99992	0.01		1	1	0	2018	2018
Triple-Negative Breast Carcinoma	C4722518	EFNA4	1945	P52798	ephrin A4	Signaling	15	0.76	0.346	0.00035006	0.01		1	1	0	2019	2019
Triple-Negative Breast Carcinoma	C4722518	EGF	1950	P01133	epidermal growth factor		774	0.357	0.923	8.5294e-17	0.1		0.917	24	0	2013	2020
Triple-Negative Breast Carcinoma	C4722518	EGFR	1956	P00533	epidermal growth factor receptor	Kinase	1394	0.295	0.885	0.36837	0.1		0.948	154	4	2009	2020
Triple-Negative Breast Carcinoma	C4722518	EGLN2	112398	Q96KS0	egl-9 family hypoxia inducible factor 2		68	0.604	0.731	0.72166	0.02		1	2	0	2017	2019
Triple-Negative Breast Carcinoma	C4722518	EGR1	1958	P18146	early growth response 1	Nucleic acid binding	378	0.433	0.923	0.3509	0.02		1	2	0	2016	2016
Triple-Negative Breast Carcinoma	C4722518	EI24	9538	O14681	EI24 autophagy associated transmembrane protein		36	0.67	0.385	0.73348	0.01		1	1	0	2017	2017
Triple-Negative Breast Carcinoma	C4722518	EIF2AK3	9451	Q9NZJ5	eukaryotic translation initiation factor 2 alpha kinase 3	Kinase	231	0.501	0.808	0.0027603	0.01		1	1	0	2017	2017
Triple-Negative Breast Carcinoma	C4722518	EIF4A2	1974	Q14240	eukaryotic translation initiation factor 4A2		74	0.604	0.731	0.99835	0.02		1	2	0	2019	2019
Triple-Negative Breast Carcinoma	C4722518	EIF4B	1975	P23588	eukaryotic translation initiation factor 4B	Nucleic acid binding	22	0.705	0.385	0.99999	0.02		1	2	0	2014	2016
Triple-Negative Breast Carcinoma	C4722518	EIF4E	1977	P06730	eukaryotic translation initiation factor 4E	Nucleic acid binding	317	0.448	0.846	0.94133	0.04		1	4	0	2011	2019
Triple-Negative Breast Carcinoma	C4722518	EIF4EBP1	1978	Q13541	eukaryotic translation initiation factor 4E binding protein 1	Nucleic acid binding	201	0.494	0.885	0.20762	0.02		1	2	0	2018	2019
Triple-Negative Breast Carcinoma	C4722518	EIF4G1	1981	Q04637	eukaryotic translation initiation factor 4 gamma 1	Nucleic acid binding	139	0.553	0.808	1	0.01		1	1	0	2019	2019
Triple-Negative Breast Carcinoma	C4722518	EIF5A2	56648	Q9GZV4	eukaryotic translation initiation factor 5A2	Nucleic acid binding	67	0.603	0.462	0.00021146	0.01		1	1	0	2019	2019
Triple-Negative Breast Carcinoma	C4722518	ELAVL2	1993	Q12926	ELAV like RNA binding protein 2		199	0.486	0.808	0.99514	0.03		1	3	0	2018	2019
Triple-Negative Breast Carcinoma	C4722518	ELK1	2002	P19419	ETS transcription factor ELK1	Transcription factor	114	0.537	0.692	0.93711	0.03		1	3	0	2016	2019
Triple-Negative Breast Carcinoma	C4722518	ELK3	2004	P41970	ETS transcription factor ELK3	Transcription factor	220	0.49	0.846	0.083508	0.01		1	1	0	2019	2019
Triple-Negative Breast Carcinoma	C4722518	ELMO1	9844	Q92556	engulfment and cell motility 1	Signaling	72	0.608	0.615	0.89997	0.01		1	1	0	2018	2018
Triple-Negative Breast Carcinoma	C4722518	ELOVL1	64834	Q9BW60	ELOVL fatty acid elongase 1	Enzyme	18	0.76	0.385	0.67897	0.01		1	1	0	2017	2017
Triple-Negative Breast Carcinoma	C4722518	ELOVL5	60481	Q9NYP7	ELOVL fatty acid elongase 5	Enzyme	57	0.638	0.462	0.93341	0.01		1	1	0	2017	2017
Triple-Negative Breast Carcinoma	C4722518	ENAH	55740	Q8N8S7	ENAH actin regulator		47	0.647	0.577	0.99994	0.01		1	1	0	2017	2017
Triple-Negative Breast Carcinoma	C4722518	ENPP1	5167	P22413	ectonucleotide pyrophosphatase/phosphodiesterase 1	Enzyme	247	0.498	0.808	4.9944e-08	0.01		1	1	0	2019	2019
Triple-Negative Breast Carcinoma	C4722518	ENY2	56943	Q9NPA8	ENY2 transcription and export complex 2 subunit		12	0.821	0.154	0.87471	0.01		1	1	0	2019	2019
Triple-Negative Breast Carcinoma	C4722518	EP300	2033	Q09472	E1A binding protein p300		345	0.459	0.846	1	0.02		1	2	1	2018	2019
Triple-Negative Breast Carcinoma	C4722518	EPAS1	2034	Q99814	endothelial PAS domain protein 1	Transcription factor	293	0.454	0.731	0.5961	0.02		1	2	0	2012	2014
Triple-Negative Breast Carcinoma	C4722518	EPCAM	4072	P16422	epithelial cell adhesion molecule		328	0.451	0.885	1.2844e-07	0.05		1	5	0	2015	2019
Triple-Negative Breast Carcinoma	C4722518	EPHA1	2041	P21709	EPH receptor A1	Kinase	119	0.544	0.731	1.4624e-23	0.01		1	1	0	2015	2015
Triple-Negative Breast Carcinoma	C4722518	EPHA2	1969	P29317	EPH receptor A2	Kinase	187	0.501	0.731	1.073e-05	0.01		1	1	0	2019	2019
Triple-Negative Breast Carcinoma	C4722518	EPHA3	2042	P29320	EPH receptor A3	Kinase	193	0.497	0.692	1.1953e-05	0.01		1	1	0	2016	2016
Triple-Negative Breast Carcinoma	C4722518	EPHB2	2048	P29323	EPH receptor B2	Kinase	649	0.374	0.846	0.99997	0.1		1	14	0	2012	2019
Triple-Negative Breast Carcinoma	C4722518	EPHB6	2051	O15197	EPH receptor B6	Kinase	60	0.619	0.538	1.2013e-07	0.01		1	1	0	2018	2018
Triple-Negative Breast Carcinoma	C4722518	EPO	2056	P01588	erythropoietin		646	0.381	0.885	0.01125	0.01		1	1	0	2019	2019
Triple-Negative Breast Carcinoma	C4722518	EPOR	2057	P19235	erythropoietin receptor	Receptor	162	0.526	0.692	0.0101	0.01		1	1	0	2019	2019
Triple-Negative Breast Carcinoma	C4722518	EPSTI1	94240	Q96J88	epithelial stromal interaction 1		12	0.805	0.154	3.3095e-25	0.01		1	1	0	2015	2015
Triple-Negative Breast Carcinoma	C4722518	ERBB2	2064	P04626	erb-b2 receptor tyrosine kinase 2	Kinase	995	0.328	0.923	0.0059892	0.1		0.873	409	3	2008	2020
Triple-Negative Breast Carcinoma	C4722518	ERBB3	2065	P21860	erb-b2 receptor tyrosine kinase 3	Kinase	318	0.448	0.808	1.7003e-15	0.03		1	3	0	2013	2018
Triple-Negative Breast Carcinoma	C4722518	ERBB4	2066	Q15303	erb-b2 receptor tyrosine kinase 4	Kinase	317	0.455	0.846	0.99912	0.02		1	2	0	2016	2016
Triple-Negative Breast Carcinoma	C4722518	ERCC1	2067	P07992	ERCC excision repair 1, endonuclease non-catalytic subunit	Enzyme	345	0.445	0.846	1.5933e-07	0.04		1	4	2	2011	2019
Triple-Negative Breast Carcinoma	C4722518	ERCC2	2068	P18074	ERCC excision repair 2, TFIIH core complex helicase subunit	Enzyme	499	0.42	0.846	7.0654e-20	0.02		1	2	2	2014	2018
Triple-Negative Breast Carcinoma	C4722518	ERCC4	2072	Q92889	ERCC excision repair 4, endonuclease catalytic subunit	Enzyme	325	0.468	0.846	1.3758e-12	0.01		1	1	2	2014	2014
Triple-Negative Breast Carcinoma	C4722518	ERCC6L	54821	Q2NKX8	ERCC excision repair 6 like, spindle assembly checkpoint helicase		20	0.743	0.385	0.99932	0.01		1	1	0	2019	2019
Triple-Negative Breast Carcinoma	C4722518	EREG	2069	O14944	epiregulin	Signaling	121	0.554	0.692	1.1659e-05	0.01		1	1	0	2019	2019
Triple-Negative Breast Carcinoma	C4722518	ERN1	2081	O75460	endoplasmic reticulum to nucleus signaling 1	Kinase	163	0.513	0.808	0.99027	0.01		1	1	0	2017	2017
Triple-Negative Breast Carcinoma	C4722518	ERO1A	30001	Q96HE7	endoplasmic reticulum oxidoreductase 1 alpha	Enzyme	34	0.678	0.538	0.80854	0.02		1	2	0	2016	2017
Triple-Negative Breast Carcinoma	C4722518	ESM1	11082	Q9NQ30	endothelial cell specific molecule 1		81	0.595	0.654	0.21202	0.01		1	1	0	2017	2017
Triple-Negative Breast Carcinoma	C4722518	ESR1	2099	P03372	estrogen receptor 1	Nuclear receptor	1101	0.324	0.962	0.9992	0.1		0.829	228	0	2008	2020
Triple-Negative Breast Carcinoma	C4722518	ESR2	2100	Q92731	estrogen receptor 2	Nuclear receptor	528	0.4	0.923	4.4516e-08	0.1		1	21	0	2012	2020
Triple-Negative Breast Carcinoma	C4722518	ESRP1	54845	Q6NXG1	epithelial splicing regulatory protein 1	Nucleic acid binding	56	0.628	0.5	0.99934	0.01		1	1	0	2017	2017
Triple-Negative Breast Carcinoma	C4722518	ESRRA	2101	P11474	estrogen related receptor alpha	Nuclear receptor	112	0.548	0.654	0.59696	0.06		1	6	0	2015	2019
Triple-Negative Breast Carcinoma	C4722518	ESRRB	2103	O95718	estrogen related receptor beta	Nuclear receptor	102	0.565	0.846	0.12609	0.03		1	3	0	2016	2020
Triple-Negative Breast Carcinoma	C4722518	ETS1	2113	P14921	ETS proto-oncogene 1, transcription factor	Transcription factor	327	0.444	0.731	0.7816	0.05		1	5	0	2013	2018
Triple-Negative Breast Carcinoma	C4722518	ETV1	2115	P50549	ETS variant transcription factor 1	Transcription factor	62	0.631	0.385	0.93694	0.02		1	2	0	2012	2017
Triple-Negative Breast Carcinoma	C4722518	EYA3	2140	Q99504	EYA transcriptional coactivator and phosphatase 3		13	0.839	0.154	0.99702	0.01		1	1	0	2018	2018
Triple-Negative Breast Carcinoma	C4722518	EZH2	2146	Q15910	enhancer of zeste 2 polycomb repressive complex 2 subunit	Epigenetic regulator	653	0.376	0.885	1	0.1		1	18	1	2012	2020
Triple-Negative Breast Carcinoma	C4722518	EZR	7430	P15311	ezrin	Cellular structure	255	0.476	0.808	0.17989	0.03		1	3	0	2017	2019
Triple-Negative Breast Carcinoma	C4722518	F11R	50848	Q9Y624	F11 receptor		127	0.542	0.731	1.8487e-05	0.01		1	1	0	2019	2019
Triple-Negative Breast Carcinoma	C4722518	F2RL1	2150	P55085	F2R like trypsin receptor 1	G-protein coupled receptor	256	0.48	0.769	0.00014843	0.02		1	2	0	2018	2019
Triple-Negative Breast Carcinoma	C4722518	F2RL2	2151	O00254	coagulation factor II thrombin receptor like 2	G-protein coupled receptor	56	0.626	0.577	1.7486e-05	0.01		1	1	0	2018	2018
Triple-Negative Breast Carcinoma	C4722518	F3	2152	P13726	coagulation factor III, tissue factor	Receptor	456	0.415	0.846	0.018872	0.03		1	3	0	2015	2018
Triple-Negative Breast Carcinoma	C4722518	FA2H	79152	Q7L5A8	fatty acid 2-hydroxylase	Enzyme	131	0.573	0.654	0.14678	0.01		1	1	0	2019	2019
Triple-Negative Breast Carcinoma	C4722518	FABP4	2167	P15090	fatty acid binding protein 4		194	0.5	0.808	5.1764e-05	0.02		1	2	1	2015	2016
Triple-Negative Breast Carcinoma	C4722518	FABP5	2171	Q01469	fatty acid binding protein 5		85	0.585	0.731	0.047008	0.03		1	3	0	2011	2016
Triple-Negative Breast Carcinoma	C4722518	FABP7	2173	O15540	fatty acid binding protein 7		82	0.584	0.577	0.00078595	0.01		1	1	0	2019	2019
Triple-Negative Breast Carcinoma	C4722518	FAM171A1	221061	Q5VUB5	family with sequence similarity 171 member A1		7	0.821	0.231	0.98528	0.02		1	2	0	2019	2019
Triple-Negative Breast Carcinoma	C4722518	FAM20C	56975	Q8IXL6	FAM20C golgi associated secretory pathway kinase		116	0.578	0.731	0.31465	0.01		1	1	0	2016	2016
Triple-Negative Breast Carcinoma	C4722518	FANCA	2175	O15360	FA complementation group A		211	0.505	0.731	1.5943e-68	0.01		0	1	0	2013	2013
Triple-Negative Breast Carcinoma	C4722518	FANCD2	2177	Q9BXW9	FA complementation group D2		272	0.479	0.885	1.0974e-30	0.01		1	1	0	2015	2015
Triple-Negative Breast Carcinoma	C4722518	FANCF	2188	Q9NPI8	FA complementation group F		153	0.535	0.731	0.45886	0.01		1	1	0	2011	2011
Triple-Negative Breast Carcinoma	C4722518	FANCI	55215	Q9NVI1	FA complementation group I		147	0.543	0.731	8.9116e-37	0.02		1	2	0	2016	2018
Triple-Negative Breast Carcinoma	C4722518	FANCM	57697	Q8IYD8	FA complementation group M	Enzyme	147	0.543	0.731	2.3536e-15	0.01		1	1	1	2017	2017
Triple-Negative Breast Carcinoma	C4722518	FASLG	356	P48023	Fas ligand	Signaling	398	0.43	0.885	0.18345	0.01		1	1	0	2016	2016
Triple-Negative Breast Carcinoma	C4722518	FASN	2194	P49327	fatty acid synthase	Enzyme	245	0.474	0.846	1	0.06		0.833	6	0	2014	2019
Triple-Negative Breast Carcinoma	C4722518	FAT1	2195	Q14517	FAT atypical cadherin 1		178	0.508	0.808	1.1969e-12	0.01		1	1	0	2018	2018
Triple-Negative Breast Carcinoma	C4722518	FBLIM1	54751	Q8WUP2	filamin binding LIM protein 1	Enzyme modulator	93	0.572	0.654	5.3941e-05	0.01		1	1	0	2017	2017
Triple-Negative Breast Carcinoma	C4722518	FBXO5	26271	Q9UKT4	F-box protein 5		16	0.769	0.269	0.96995	0.01		1	1	0	2019	2019
Triple-Negative Breast Carcinoma	C4722518	FBXW7	55294	Q969H0	F-box and WD repeat domain containing 7	Enzyme modulator	257	0.465	0.808	0.99949	0.02		1	2	0	2017	2019
Triple-Negative Breast Carcinoma	C4722518	FCGR3A	2214	P08637	Fc fragment of IgG receptor IIIa	Cell adhesion	352	0.432	0.962	3.6955e-06	0.01		1	1	0	2020	2020
Triple-Negative Breast Carcinoma	C4722518	FCGR3B	2215	O75015	Fc fragment of IgG receptor IIIb	Cell adhesion	291	0.452	0.962	3.0294e-07	0.01		1	1	0	2020	2020
Triple-Negative Breast Carcinoma	C4722518	FERD3L	222894	Q96RJ6	Fer3 like bHLH transcription factor		6	0.839	0.192	0.31875	0.01		1	1	0	2019	2019
Triple-Negative Breast Carcinoma	C4722518	FGF10-AS1	101927075		FGF10 antisense RNA 1		5	0.839	0.077		0.01		1	1	0	2019	2019
Triple-Negative Breast Carcinoma	C4722518	FGF2	2247	P09038	fibroblast growth factor 2	Signaling	635	0.383	0.923	0.0184	0.03		1	3	0	2014	2019
Triple-Negative Breast Carcinoma	C4722518	FGFBP1	9982	Q14512	fibroblast growth factor binding protein 1		19	0.736	0.385	0.58794	0.02		1	2	0	2017	2017
Triple-Negative Breast Carcinoma	C4722518	FGFR1	2260	P11362	fibroblast growth factor receptor 1	Kinase	816	0.362	0.885	0.99984	0.04		1	4	0	2014	2016
Triple-Negative Breast Carcinoma	C4722518	FGFR2	2263	P21802	fibroblast growth factor receptor 2	Kinase	731	0.38	0.808	0.99731	0.01		1	1	1	2014	2014
Triple-Negative Breast Carcinoma	C4722518	FGFR3	2261	P22607	fibroblast growth factor receptor 3	Kinase	654	0.391	0.846	1.6432e-05	0.01		1	1	0	2016	2016
Triple-Negative Breast Carcinoma	C4722518	FHOD1	29109	Q9Y613	formin homology 2 domain containing 1		12	0.805	0.154	1.8119e-16	0.01		1	1	0	2018	2018
Triple-Negative Breast Carcinoma	C4722518	FKBP4	2288	Q02790	FKBP prolyl isomerase 4	Enzyme	149	0.532	0.769	0.15539	0.02		1	2	0	2018	2019
Triple-Negative Breast Carcinoma	C4722518	FLI1	2313	Q01543	Fli-1 proto-oncogene, ETS transcription factor	Transcription factor	318	0.468	0.692	0.9894	0.01		1	1	0	2018	2018
Triple-Negative Breast Carcinoma	C4722518	FLNA	2316	P21333	filamin A		571	0.419	0.846	1	0.01		1	1	0	2016	2016
Triple-Negative Breast Carcinoma	C4722518	FLT1	2321	P17948	fms related receptor tyrosine kinase 1	Kinase	424	0.419	0.846	0.99983	0.01		1	1	0	2018	2018
Triple-Negative Breast Carcinoma	C4722518	FLT4	2324	P35916	fms related receptor tyrosine kinase 4	Kinase	306	0.457	0.808	1	0.01		1	1	0	2017	2017
Triple-Negative Breast Carcinoma	C4722518	FMR1	2332	Q06787	FMRP translational regulator 1	Nucleic acid binding	346	0.473	0.769	0.64718	0.01		1	1	0	2013	2013
Triple-Negative Breast Carcinoma	C4722518	FN1	2335	P02751	fibronectin 1	Signaling	724	0.365	0.962	0.0014045	0.05		1	5	0	2015	2018
Triple-Negative Breast Carcinoma	C4722518	FOLH1	2346	Q04609	folate hydrolase 1	Enzyme	311	0.453	0.885	6.1977e-09	0.02		1	2	0	2018	2019
Triple-Negative Breast Carcinoma	C4722518	FOLR1	2348	P15328	folate receptor alpha		174	0.522	0.885	0.12642	0.05		1	5	0	2016	2019
Triple-Negative Breast Carcinoma	C4722518	FOLR2	2350	P14207	folate receptor beta		105	0.559	0.654	5.4816e-06	0.04		1	4	0	2016	2019
Triple-Negative Breast Carcinoma	C4722518	FOS	2353	P01100	Fos proto-oncogene, AP-1 transcription factor subunit	Transcription factor	528	0.411	0.885	0.26176	0.01		1	1	0	2019	2019
Triple-Negative Breast Carcinoma	C4722518	FOSB	2354	P53539	FosB proto-oncogene, AP-1 transcription factor subunit	Transcription factor	278	0.463	0.846	0.97553	0.01		1	1	0	2019	2019
Triple-Negative Breast Carcinoma	C4722518	FOSL1	8061	P15407	FOS like 1, AP-1 transcription factor subunit	Transcription factor	150	0.519	0.846	0.15849	0.07		1	7	0	2014	2020
Triple-Negative Breast Carcinoma	C4722518	FOXA1	3169	P55317	forkhead box A1	Transcription factor	138	0.522	0.731	0.22227	0.07		1	7	0	2015	2020
Triple-Negative Breast Carcinoma	C4722518	FOXC1	2296	Q12948	forkhead box C1	Transcription factor	242	0.483	0.846	0.95337	0.07		1	7	0	2017	2019
Triple-Negative Breast Carcinoma	C4722518	FOXC2	2303	Q99958	forkhead box C2	Transcription factor	168	0.515	0.731	0.13356	0.02		0.5	2	0	2015	2017
Triple-Negative Breast Carcinoma	C4722518	FOXCUT	101927703		FOXC1 upstream transcript		10	0.821	0.115		0.01		1	1	0	2019	2019
Triple-Negative Breast Carcinoma	C4722518	FOXE3	2301	Q13461	forkhead box E3	Transcription factor	118	0.568	0.654	0.18135	0.01		1	1	0	2020	2020
Triple-Negative Breast Carcinoma	C4722518	FOXF2	2295	Q12947	forkhead box F2		57	0.621	0.5	0.84666	0.05		0.8	5	0	2013	2019
Triple-Negative Breast Carcinoma	C4722518	FOXM1	2305	Q08050	forkhead box M1		323	0.441	0.769	0.0007414	0.1		1	14	0	2012	2019
Triple-Negative Breast Carcinoma	C4722518	FOXO1	2308	Q12778	forkhead box O1		380	0.433	0.846	0.99725	0.01		1	1	0	2018	2018
Triple-Negative Breast Carcinoma	C4722518	FOXO3	2309	O43524	forkhead box O3		381	0.431	0.808	0.98806	0.06		1	6	0	2015	2018
Triple-Negative Breast Carcinoma	C4722518	FOXO4	4303	P98177	forkhead box O4		84	0.588	0.769	0.81332	0.01		1	1	0	2018	2018
Triple-Negative Breast Carcinoma	C4722518	FOXO6	100132074	A8MYZ6	forkhead box O6		32	0.7	0.423	0.40546	0.01		1	1	0	2018	2018
Triple-Negative Breast Carcinoma	C4722518	FOXP3	50943	Q9BZS1	forkhead box P3		688	0.368	0.846	0.99424	0.03		1	3	1	2014	2019
Triple-Negative Breast Carcinoma	C4722518	FPR1	2357	P21462	formyl peptide receptor 1	G-protein coupled receptor	93	0.576	0.769		0.01		1	1	0	2018	2018
Triple-Negative Breast Carcinoma	C4722518	FRA16D	2463		fragile site, aphidicolin type, common, fra(16)(q23.2)		42	0.656	0.577		0.01		1	1	0	2018	2018
Triple-Negative Breast Carcinoma	C4722518	FRTS1	65211		Fanconi renotubular syndrome		69	0.599	0.654		0.02		1	2	0	2017	2019
Triple-Negative Breast Carcinoma	C4722518	FSCN1	6624	Q16658	fascin actin-bundling protein 1	Cellular structure	175	0.504	0.731	0.86852	0.03		1	3	0	2016	2019
Triple-Negative Breast Carcinoma	C4722518	FSIP1	161835	Q8NA03	fibrous sheath interacting protein 1		47	0.663	0.615	7.6972e-14	0.01		1	1	0	2018	2018
Triple-Negative Breast Carcinoma	C4722518	FTH1	2495	P02794	ferritin heavy chain 1	Storage	107	0.559	0.731	0.13999	0.01		1	1	0	2018	2018
Triple-Negative Breast Carcinoma	C4722518	FZD1	8321	Q9UP38	frizzled class receptor 1	G-protein coupled receptor	77	0.587	0.615	0.042428	0.02		1	2	0	2012	2017
Triple-Negative Breast Carcinoma	C4722518	FZD4	8322	Q9ULV1	frizzled class receptor 4	G-protein coupled receptor	239	0.49	0.923	0.96962	0.01		1	1	0	2014	2014
Triple-Negative Breast Carcinoma	C4722518	FZD5	7855	Q13467	frizzled class receptor 5	G-protein coupled receptor	82	0.587	0.615	0.98255	0.02		1	2	0	2012	2017
Triple-Negative Breast Carcinoma	C4722518	FZD6	8323	O60353	frizzled class receptor 6	G-protein coupled receptor	57	0.623	0.615	2.0034e-12	0.01		1	1	0	2017	2017
Triple-Negative Breast Carcinoma	C4722518	FZD7	8324	O75084	frizzled class receptor 7	G-protein coupled receptor	70	0.601	0.538	0.08835	0.05		1	5	0	2012	2018
Triple-Negative Breast Carcinoma	C4722518	FZD8	8325	Q9H461	frizzled class receptor 8	G-protein coupled receptor	34	0.674	0.385	0.78983	0.01		1	1	0	2013	2013
Triple-Negative Breast Carcinoma	C4722518	G6PD	2539	P11413	glucose-6-phosphate dehydrogenase	Enzyme	410	0.424	0.846	0.97158	0.01		1	1	0	2016	2016
Triple-Negative Breast Carcinoma	C4722518	GABARAPL1	23710	Q9H0R8	GABA type A receptor associated protein like 1	Cellular structure	30	0.691	0.5	0.83532	0.01		1	1	0	2017	2017
Triple-Negative Breast Carcinoma	C4722518	GABPA	2551	Q06546	GA binding protein transcription factor subunit alpha	Transcription factor	632	0.379	0.885	0.99812	0.01		1	1	0	2015	2015
Triple-Negative Breast Carcinoma	C4722518	GABRA3	2556	P34903	gamma-aminobutyric acid type A receptor subunit alpha3	Ion channel	81	0.636	0.577	0.038786	0.01		0	1	0	2019	2019
Triple-Negative Breast Carcinoma	C4722518	GABRP	2568	O00591	gamma-aminobutyric acid type A receptor subunit pi	Ion channel	20	0.736	0.462	1.8174e-13	0.01		1	1	0	2019	2019
Triple-Negative Breast Carcinoma	C4722518	GADD45A	1647	P24522	growth arrest and DNA damage inducible alpha		151	0.526	0.769	0.044075	0.01		1	1	0	2018	2018
Triple-Negative Breast Carcinoma	C4722518	GAS1	2619	P54826	growth arrest specific 1		88	0.587	0.654	0.81915	0.01		1	1	0	2014	2014
Triple-Negative Breast Carcinoma	C4722518	GAS5	60674		growth arrest specific 5		184	0.497	0.808		0.04		1	4	0	2016	2020
Triple-Negative Breast Carcinoma	C4722518	GAS6	2621	Q14393	growth arrest specific 6	Extracellular structure	190	0.5	0.769	0.034477	0.01		1	1	0	2017	2017
Triple-Negative Breast Carcinoma	C4722518	GATA3	2625	P23771	GATA binding protein 3		429	0.415	0.846	0.89887	0.05		1	5	0	2013	2019
Triple-Negative Breast Carcinoma	C4722518	GBP1	2633	P32455	guanylate binding protein 1	Enzyme modulator	53	0.626	0.731	1.2564e-15	0.01		1	1	0	2017	2017
Triple-Negative Breast Carcinoma	C4722518	GCLM	2730	P48507	glutamate-cysteine ligase modifier subunit	Enzyme	78	0.588	0.846	0.99011	0.01		1	1	0	2018	2018
Triple-Negative Breast Carcinoma	C4722518	GDE1	51573	Q9NZC3	glycerophosphodiester phosphodiesterase 1		228	0.481	0.808	6.1163e-06	0.01		1	1	0	2015	2015
Triple-Negative Breast Carcinoma	C4722518	GDF10	2662	P55107	growth differentiation factor 10	Signaling	62	0.628	0.654	0.0053478	0.01		1	1	0	2019	2019
Triple-Negative Breast Carcinoma	C4722518	GDF11	10220	O95390	growth differentiation factor 11	Signaling	86	0.584	0.692	0.97645	0.01		1	1	0	2017	2017
Triple-Negative Breast Carcinoma	C4722518	GFPT1	2673	Q06210	glutamine--fructose-6-phosphate transaminase 1	Enzyme	104	0.612	0.654	0.89953	0.01		1	1	0	2016	2016
Triple-Negative Breast Carcinoma	C4722518	GFRA1	2674	P56159	GDNF family receptor alpha 1		73	0.619	0.615	0.1175	0.01		1	1	0	2017	2017
Triple-Negative Breast Carcinoma	C4722518	GGCX	2677	P38435	gamma-glutamyl carboxylase		56	0.678	0.538	2.0199e-14	0.01		1	1	0	2019	2019
Triple-Negative Breast Carcinoma	C4722518	GGNBP2	79893	Q9H3C7	gametogenetin binding protein 2		31	0.7	0.423	1	0.01		1	1	0	2019	2019
Triple-Negative Breast Carcinoma	C4722518	GHR	2690	P10912	growth hormone receptor	Signaling	247	0.49	0.846	8.4385e-05	0.01		1	1	0	2018	2018
Triple-Negative Breast Carcinoma	C4722518	GHRH	2691	P01286	growth hormone releasing hormone	Signaling	176	0.503	0.769	0.14964	0.03		1	3	0	2013	2018
Triple-Negative Breast Carcinoma	C4722518	GINS2	51659	Q9Y248	GINS complex subunit 2	Enzyme	51	0.638	0.577	1.5745e-08	0.01		1	1	0	2016	2016
Triple-Negative Breast Carcinoma	C4722518	GJA1	2697	P17302	gap junction protein alpha 1	Cell-cell junction	662	0.393	0.885	0.15523	0.01		1	1	0	2015	2015
Triple-Negative Breast Carcinoma	C4722518	GJB2	2706	P29033	gap junction protein beta 2	Cell-cell junction	392	0.441	0.846	6.562e-16	0.01		1	1	0	2018	2018
Triple-Negative Breast Carcinoma	C4722518	GLCE	26035	O94923	glucuronic acid epimerase		27	0.729	0.269	0.65444	0.01		1	1	1	2017	2017
Triple-Negative Breast Carcinoma	C4722518	GLI1	2735	P08151	GLI family zinc finger 1		369	0.431	0.846	7.6639e-14	0.02		1	2	0	2016	2017
Triple-Negative Breast Carcinoma	C4722518	GLRX3	10539	O76003	glutaredoxin 3	Enzyme	37	0.686	0.538	0.35753	0.01		1	1	0	2018	2018
Triple-Negative Breast Carcinoma	C4722518	GLS	2744	O94925	glutaminase	Enzyme	217	0.489	0.808	0.96154	0.06		0.833	6	0	2017	2019
Triple-Negative Breast Carcinoma	C4722518	GMNN	51053	O75496	geminin DNA replication inhibitor		153	0.554	0.808	0.1149	0.01		1	1	0	2019	2019
Triple-Negative Breast Carcinoma	C4722518	GNL3	26354	Q9BVP2	G protein nucleolar 3		87	0.579	0.577	1.9878e-19	0.01		1	1	0	2019	2019
Triple-Negative Breast Carcinoma	C4722518	GNRH1	2796	P01148	gonadotropin releasing hormone 1		179	0.524	0.731	0.15146	0.02		1	2	0	2014	2019
Triple-Negative Breast Carcinoma	C4722518	GOPC	57120	Q9HD26	golgi associated PDZ and coiled-coil motif containing		103	0.561	0.654	0.00084252	0.01		1	1	0	2017	2017
Triple-Negative Breast Carcinoma	C4722518	GORASP1	64689	Q9BQQ3	golgi reassembly stacking protein 1		369	0.428	0.846	0.019543	0.03		1	3	0	2016	2019
Triple-Negative Breast Carcinoma	C4722518	GOT2	2806	P00505	glutamic-oxaloacetic transaminase 2		148	0.529	0.731	0.014233	0.01		1	1	0	2019	2019
Triple-Negative Breast Carcinoma	C4722518	GPER1	2852	Q99527	G protein-coupled estrogen receptor 1	G-protein coupled receptor	180	0.505	0.731	0.57434	0.09		1	9	0	2012	2019
Triple-Negative Breast Carcinoma	C4722518	GPNMB	10457	Q14956	glycoprotein nmb	Signaling	103	0.566	0.692	2.8803e-27	0.01		1	1	0	2017	2017
Triple-Negative Breast Carcinoma	C4722518	GPR151	134391	Q8TDV0	G protein-coupled receptor 151	G-protein coupled receptor	169	0.53	0.923	3.2266e-08	0.01		1	1	0	2014	2014
Triple-Negative Breast Carcinoma	C4722518	GPR161	23432	Q8N6U8	G protein-coupled receptor 161	G-protein coupled receptor	40	0.686	0.462	0.00034935	0.01		1	1	0	2014	2014
Triple-Negative Breast Carcinoma	C4722518	GPR166P	442206		G protein-coupled receptor 166 pseudogene		165	0.531	0.923		0.01		1	1	0	2014	2014
Triple-Negative Breast Carcinoma	C4722518	GPR42	2866	O15529	G protein-coupled receptor 42 (gene/pseudogene)	G-protein coupled receptor	255	0.475	0.846	0.050905	0.01		1	1	0	2014	2014
Triple-Negative Breast Carcinoma	C4722518	GPRC6A	222545	Q5T6X5	G protein-coupled receptor class C group 6 member A	G-protein coupled receptor	173	0.526	0.923	5.5919e-17	0.01		1	1	0	2014	2014
Triple-Negative Breast Carcinoma	C4722518	GPS1	2873	Q13098	G protein pathway suppressor 1		12	0.769	0.346	0.99819	0.01		1	1	0	2018	2018
Triple-Negative Breast Carcinoma	C4722518	GRAP2	9402	O75791	GRB2 related adaptor protein 2		538	0.394	0.923	0.00015256	0.03		1	3	0	2018	2019
Triple-Negative Breast Carcinoma	C4722518	GRB7	2886	Q14451	growth factor receptor bound protein 7	Receptor	71	0.603	0.462	1.3644e-06	0.03		1	3	0	2011	2014
Triple-Negative Breast Carcinoma	C4722518	GREM1	26585	O60565	gremlin 1, DAN family BMP antagonist		179	0.508	0.808	0.47436	0.01		1	1	0	2013	2013
Triple-Negative Breast Carcinoma	C4722518	GRK3	157	P35626	G protein-coupled receptor kinase 3	Kinase	56	0.621	0.731	0.71059	0.01		1	1	0	2016	2016
Triple-Negative Breast Carcinoma	C4722518	GRK5	2869	P34947	G protein-coupled receptor kinase 5	Kinase	86	0.588	0.769	0.67567	0.01		1	1	0	2019	2019
Triple-Negative Breast Carcinoma	C4722518	GRM1	2911	Q13255	glutamate metabotropic receptor 1	G-protein coupled receptor	172	0.528	0.808	0.14279	0.03		1	3	0	2014	2018
Triple-Negative Breast Carcinoma	C4722518	GRPR	2925	P30550	gastrin releasing peptide receptor	G-protein coupled receptor	85	0.595	0.538	0.22444	0.01		1	1	0	2019	2019
Triple-Negative Breast Carcinoma	C4722518	GSK3B	2932	P49841	glycogen synthase kinase 3 beta	Kinase	393	0.43	0.846	0.95571	0.02		1	2	0	2017	2019
Triple-Negative Breast Carcinoma	C4722518	GSR	2936	P00390	glutathione-disulfide reductase	Enzyme	206	0.494	0.846	1.2922e-06	0.01		1	1	0	2018	2018
Triple-Negative Breast Carcinoma	C4722518	GSTK1	373156	Q9Y2Q3	glutathione S-transferase kappa 1		445	0.412	0.885	1.9374e-06	0.01		1	1	0	2019	2019
Triple-Negative Breast Carcinoma	C4722518	GSTP1	2950	P09211	glutathione S-transferase pi 1		610	0.383	0.923	0.014155	0.03		1	3	0	2015	2017
Triple-Negative Breast Carcinoma	C4722518	GTF2H1	2965	P32780	general transcription factor IIH subunit 1	Transcription factor	258	0.469	0.846	0.98982	0.01		1	1	0	2012	2012
Triple-Negative Breast Carcinoma	C4722518	GTF2H4	2968	Q92759	general transcription factor IIH subunit 4	Transcription factor	87	0.573	0.846	4.2353e-07	0.01		1	1	0	2018	2018
Triple-Negative Breast Carcinoma	C4722518	GTSE1	51512	Q9NYZ3	G2 and S-phase expressed 1		25	0.705	0.269	2.7012e-05	0.02		1	2	0	2017	2019
Triple-Negative Breast Carcinoma	C4722518	GUCY2D	3000	Q02846	guanylate cyclase 2D, retinal	Kinase	121	0.57	0.769	6.4574e-10	0.01		1	1	0	2020	2020
Triple-Negative Breast Carcinoma	C4722518	GZMB	3002	P10144	granzyme B	Enzyme	290	0.453	0.808	3.6674e-14	0.01		1	1	0	2014	2014
Triple-Negative Breast Carcinoma	C4722518	H2AX	3014	P16104	H2A.X variant histone	Nucleic acid binding	212	0.484	0.808	0.17652	0.05		1	5	0	2011	2019
Triple-Negative Breast Carcinoma	C4722518	H2BC12	85236	O60814	H2B clustered histone 12	Nucleic acid binding	16	0.743	0.308	4.2884e-06	0.01		1	1	0	2019	2019
Triple-Negative Breast Carcinoma	C4722518	H3P10	115482713		H3 histone pseudogene 10		769	0.35	0.846		0.03		1	3	0	2014	2019
Triple-Negative Breast Carcinoma	C4722518	H3P23	115482696		H3 histone pseudogene 23		310	0.443	0.769		0.04		1	4	0	2014	2019
Triple-Negative Breast Carcinoma	C4722518	H3P42	115482704		H3 histone pseudogene 42		45	0.641	0.577		0.01		1	1	0	2018	2018
Triple-Negative Breast Carcinoma	C4722518	HAND2	9464	P61296	heart and neural crest derivatives expressed 2		79	0.612	0.5	0.39908	0.01		1	1	0	2019	2019
Triple-Negative Breast Carcinoma	C4722518	HAND2-AS1	79804		HAND2 antisense RNA 1		38	0.663	0.462		0.01		1	1	0	2019	2019
Triple-Negative Breast Carcinoma	C4722518	HAVCR2	84868	Q8TDQ0	hepatitis A virus cellular receptor 2		299	0.45	0.808	0.03866	0.01		1	1	0	2018	2018
Triple-Negative Breast Carcinoma	C4722518	HBEGF	1839	Q99075	heparin binding EGF like growth factor	Signaling	155	0.52	0.769	0.07563	0.02		1	2	0	2013	2018
Triple-Negative Breast Carcinoma	C4722518	HBG1	3047	P69891	hemoglobin subunit gamma 1		65	0.615	0.538	0.56611	0.01		1	1	0	2018	2018
Triple-Negative Breast Carcinoma	C4722518	HBG2	3048	P69892	hemoglobin subunit gamma 2		112	0.565	0.692	0.66982	0.01		1	1	0	2018	2018
Triple-Negative Breast Carcinoma	C4722518	HCC	619501		thyroid carcinoma, Hurthle cell		45	0.644	0.423		0.02		1	2	0	2017	2019
Triple-Negative Breast Carcinoma	C4722518	HCLS1	3059	P14317	hematopoietic cell-specific Lyn substrate 1	Cellular structure	132	0.539	0.846	1.3157e-06	0.01		1	1	0	2019	2019
Triple-Negative Breast Carcinoma	C4722518	HCP5	10866	Q6MZN7	HLA complex P5		79	0.595	0.808		0.02		1	2	0	2019	2019
Triple-Negative Breast Carcinoma	C4722518	HDAC1	3065	Q13547	histone deacetylase 1	Epigenetic regulator	277	0.46	0.846	0.61427	0.01		1	1	0	2015	2015
Triple-Negative Breast Carcinoma	C4722518	HDAC3	8841	O15379	histone deacetylase 3	Epigenetic regulator	179	0.511	0.731	0.56737	0.03		1	3	0	2017	2019
Triple-Negative Breast Carcinoma	C4722518	HDAC6	10013	Q9UBN7	histone deacetylase 6	Epigenetic regulator	288	0.465	0.846	1	0.02		1	2	0	2017	2019
Triple-Negative Breast Carcinoma	C4722518	HDAC8	55869	Q9BY41	histone deacetylase 8	Epigenetic regulator	236	0.511	0.885	0.97707	0.03		1	3	0	2017	2020
Triple-Negative Breast Carcinoma	C4722518	HDAC9	9734	Q9UKV0	histone deacetylase 9	Epigenetic regulator	340	0.439	0.846	0.99973	0.09		0.889	9	0	2012	2019
Triple-Negative Breast Carcinoma	C4722518	HEATR6	63897	Q6AI08	HEAT repeat containing 6	Immune response	35	0.678	0.462	5.1848e-21	0.01		1	1	0	2019	2019
Triple-Negative Breast Carcinoma	C4722518	HEIH	100859930		hepatocellular carcinoma up-regulated EZH2-associated long non-coding RNA		23	0.722	0.269		0.01		1	1	0	2019	2019
Triple-Negative Breast Carcinoma	C4722518	HES1	3280	Q14469	hes family bHLH transcription factor 1	Transcription factor	243	0.468	0.885	0.7072	0.02		1	2	0	2018	2019
Triple-Negative Breast Carcinoma	C4722518	HGF	3082	P14210	hepatocyte growth factor	Enzyme	671	0.374	0.885	0.99947	0.02		1	2	0	2012	2015
Triple-Negative Breast Carcinoma	C4722518	HGS	9146	O14964	hepatocyte growth factor-regulated tyrosine kinase substrate		74	0.597	0.808	0.0063571	0.01		1	1	0	2015	2015
Triple-Negative Breast Carcinoma	C4722518	HIC1	3090	Q14526	HIC ZBTB transcriptional repressor 1	Transcription factor	163	0.522	0.615	0.13002	0.01		1	1	0	2014	2014
Triple-Negative Breast Carcinoma	C4722518	HIF1A	3091	Q16665	hypoxia inducible factor 1 subunit alpha	Transcription factor	1044	0.327	0.923	0.9777	0.1		1	28	0	2010	2019
Triple-Negative Breast Carcinoma	C4722518	HIF1A-AS2	100750247		HIF1A antisense RNA 2		23	0.711	0.269		0.01		1	1	0	2019	2019
Triple-Negative Breast Carcinoma	C4722518	HLA-A	3105	P04439	major histocompatibility complex, class I, A		672	0.37	0.846	0.0013299	0.01		1	1	0	2017	2017
Triple-Negative Breast Carcinoma	C4722518	HLA-C	3107	P10321	major histocompatibility complex, class I, C		435	0.415	0.846	1.5695e-06	0.01		1	1	0	2017	2017
Triple-Negative Breast Carcinoma	C4722518	HMGA1	3159	P17096	high mobility group AT-hook 1	Nucleic acid binding	206	0.494	0.769	0.83209	0.06		1	6	0	2013	2019
Triple-Negative Breast Carcinoma	C4722518	HMGA2	8091	P52926	high mobility group AT-hook 2	Nucleic acid binding	382	0.429	0.808	0.87015	0.06		1	6	0	2013	2019
Triple-Negative Breast Carcinoma	C4722518	HNRNPK	3190	P61978	heterogeneous nuclear ribonucleoprotein K	Enzyme	185	0.539	0.846	0.99998	0.01		1	1	0	2019	2019
Triple-Negative Breast Carcinoma	C4722518	HNRNPM	4670	P52272	heterogeneous nuclear ribonucleoprotein M	Nucleic acid binding	26	0.729	0.346	0.99999	0.01		1	1	0	2018	2018
Triple-Negative Breast Carcinoma	C4722518	HOTAIR	100124700		HOX transcript antisense RNA		234	0.475	0.769		0.04		1	4	0	2015	2020
Triple-Negative Breast Carcinoma	C4722518	HOXC6	3223	P09630	homeobox C6	Transcription factor	80	0.595	0.692	0.51165	0.01		1	1	0	2019	2019
Triple-Negative Breast Carcinoma	C4722518	HOXC8	3224	P31273	homeobox C8		40	0.659	0.538	0.1695	0.01		1	1	0	2019	2019
Triple-Negative Breast Carcinoma	C4722518	HOXD13	3239	P35453	homeobox D13		259	0.483	0.808	0.0086055	0.01		1	1	0	2019	2019
Triple-Negative Breast Carcinoma	C4722518	HP	3240	P00738	haptoglobin	Enzyme	464	0.412	0.885	1.736e-05	0.02		1	2	0	2018	2019
Triple-Negative Breast Carcinoma	C4722518	HPGDS	27306	O60760	hematopoietic prostaglandin D synthase		570	0.388	0.923	1.8063e-06	0.01		1	1	0	2015	2015
Triple-Negative Breast Carcinoma	C4722518	HPS5	11234	Q9UPZ3	HPS5 biogenesis of lysosomal organelles complex 2 subunit 2		45	0.674	0.423	1.8969e-13	0.01		1	1	0	2019	2019
Triple-Negative Breast Carcinoma	C4722518	HPSE	10855	Q9Y251	heparanase	Enzyme	393	0.425	0.808	2.266e-14	0.01		1	1	0	2019	2019
Triple-Negative Breast Carcinoma	C4722518	HSF1	3297	Q00613	heat shock transcription factor 1	Transcription factor	185	0.507	0.769	0.74762	0.01		1	1	0	2017	2017
Triple-Negative Breast Carcinoma	C4722518	HSP90AA1	3320	P07900	heat shock protein 90 alpha family class A member 1	Chaperone	455	0.411	0.923	0.86025	0.1		1	13	0	2014	2019
Triple-Negative Breast Carcinoma	C4722518	HSPA4	3308	P34932	heat shock protein family A (Hsp70) member 4		550	0.394	0.923	0.99954	0.01		1	1	0	2008	2008
Triple-Negative Breast Carcinoma	C4722518	HSPA5	3309	P11021	heat shock protein family A (Hsp70) member 5		350	0.434	0.885	0.77341	0.05		1	5	0	2015	2019
Triple-Negative Breast Carcinoma	C4722518	HSPG2	3339	P98160	heparan sulfate proteoglycan 2	Enzyme modulator	405	0.438	0.885	1.0376e-19	0.01		1	1	0	2019	2019
Triple-Negative Breast Carcinoma	C4722518	HTR7	3363	P34969	5-hydroxytryptamine receptor 7	G-protein coupled receptor	103	0.592	0.5	0.045409	0.01		1	1	0	2017	2017
Triple-Negative Breast Carcinoma	C4722518	HYAL2	8692	Q12891	hyaluronidase 2	Enzyme	54	0.644	0.577	0.18682	0.01		1	1	0	2015	2015
Triple-Negative Breast Carcinoma	C4722518	ICAM1	3383	P05362	intercellular adhesion molecule 1		737	0.364	0.962	0.035295	0.05		1	5	0	2018	2019
Triple-Negative Breast Carcinoma	C4722518	ID4	3400	P47928	inhibitor of DNA binding 4, HLH protein	Transcription factor	86	0.59	0.615	0.031243	0.02		1	2	0	2016	2018
Triple-Negative Breast Carcinoma	C4722518	IDH1	3417	O75874	isocitrate dehydrogenase (NADP(+)) 1		399	0.424	0.808	2.6244e-12	0.01		1	1	0	2019	2019
Triple-Negative Breast Carcinoma	C4722518	IDH2	3418	P48735	isocitrate dehydrogenase (NADP(+)) 2		380	0.434	0.808	0.88271	0.01		1	1	0	2019	2019
Triple-Negative Breast Carcinoma	C4722518	IDO1	3620	P14902	indoleamine 2,3-dioxygenase 1		295	0.454	0.846	3.3013e-06	0.02		1	2	0	2017	2019
Triple-Negative Breast Carcinoma	C4722518	IDUA	3425	P35475	alpha-L-iduronidase	Enzyme	258	0.499	0.846	3.7599e-13	0.03		1	3	0	2015	2019
Triple-Negative Breast Carcinoma	C4722518	IFI27	3429	P40305	interferon alpha inducible protein 27		332	0.437	0.769	0.010698	0.04		1	4	0	2014	2019
Triple-Negative Breast Carcinoma	C4722518	IFIT2	3433	P09913	interferon induced protein with tetratricopeptide repeats 2		42	0.656	0.5	0.25099	0.01		1	1	0	2019	2019
Triple-Negative Breast Carcinoma	C4722518	IFNB1	3456	P01574	interferon beta 1		426	0.421	0.846		0.03		1	3	0	2017	2019
Triple-Negative Breast Carcinoma	C4722518	IFNG	3458	P01579	interferon gamma		1519	0.288	0.962	0.47156	0.02		1	2	0	2018	2020
Triple-Negative Breast Carcinoma	C4722518	IGF1	3479	P05019	insulin like growth factor 1		1206	0.318	0.885	0.2716	0.08		1	8	0	2011	2019
Triple-Negative Breast Carcinoma	C4722518	IGF1R	3480	P08069	insulin like growth factor 1 receptor	Kinase	556	0.399	0.885	0.96799	0.08		1	8	0	2015	2019
Triple-Negative Breast Carcinoma	C4722518	IGF2	3481	P01344	insulin like growth factor 2		604	0.39	0.885	0.044127	0.05		1	5	0	2015	2018
Triple-Negative Breast Carcinoma	C4722518	IGF2BP2	10644	Q9Y6M1	insulin like growth factor 2 mRNA binding protein 2	Enzyme	94	0.588	0.615	0.23861	0.01		1	1	0	2018	2018
Triple-Negative Breast Carcinoma	C4722518	IGF2BP3	10643	O00425	insulin like growth factor 2 mRNA binding protein 3	Enzyme	97	0.57	0.577	0.99999	0.01		1	1	0	2016	2016
Triple-Negative Breast Carcinoma	C4722518	IGFBP3	3486	P17936	insulin like growth factor binding protein 3	Enzyme modulator	350	0.439	0.808	0.91029	0.04		1	4	0	2014	2019
Triple-Negative Breast Carcinoma	C4722518	IGKV@	3519		immunoglobulin kappa variable cluster		15	0.743	0.231		0.01		1	1	0	2016	2016
Triple-Negative Breast Carcinoma	C4722518	IGKV1-5	28299	P01602	immunoglobulin kappa variable 1-5	Immune response	9	0.805	0.192		0.01		1	1	0	2016	2016
Triple-Negative Breast Carcinoma	C4722518	IGKV2-29	28920	A2NJV5	immunoglobulin kappa variable 2-29 (gene/pseudogene)	Immune response	12	0.769	0.231		0.01		1	1	0	2016	2016
Triple-Negative Breast Carcinoma	C4722518	IKBKE	9641	Q14164	inhibitor of nuclear factor kappa B kinase subunit epsilon	Kinase	79	0.597	0.731	0.0090053	0.02		1	2	0	2014	2018
Triple-Negative Breast Carcinoma	C4722518	IL10	3586	P22301	interleukin 10		1679	0.281	0.923	0.0058874	0.01		1	1	0	2018	2018
Triple-Negative Breast Carcinoma	C4722518	IL15	3600	P40933	interleukin 15		426	0.422	0.846	0.70859	0.03		1	3	0	2011	2018
Triple-Negative Breast Carcinoma	C4722518	IL16	3603	Q14005	interleukin 16	Signaling	193	0.501	0.846	1.2449e-10	0.01		1	1	0	2018	2018
Triple-Negative Breast Carcinoma	C4722518	IL17A	3605	Q16552	interleukin 17A		1074	0.324	0.923	0.043049	0.01		1	1	0	2019	2019
Triple-Negative Breast Carcinoma	C4722518	IL17F	112744	Q96PD4	interleukin 17F		236	0.48	0.808	0.039165	0.01		1	1	0	2019	2019
Triple-Negative Breast Carcinoma	C4722518	IL18	3606	Q14116	interleukin 18		750	0.365	0.923	0.030717	0.01		1	1	0	2017	2017
Triple-Negative Breast Carcinoma	C4722518	IL18R1	8809	Q13478	interleukin 18 receptor 1	Receptor	234	0.473	0.808	8.625e-06	0.01		1	1	0	2018	2018
Triple-Negative Breast Carcinoma	C4722518	IL19	29949	Q9UHD0	interleukin 19		103	0.558	0.769	4.325e-05	0.01		1	1	0	2019	2019
Triple-Negative Breast Carcinoma	C4722518	IL1B	3553	P01584	interleukin 1 beta		1801	0.276	0.962	0.13005	0.03		1	3	0	2014	2019
Triple-Negative Breast Carcinoma	C4722518	IL1RAP	3556	Q9NPH3	interleukin 1 receptor accessory protein	Receptor	49	0.647	0.654	0.25846	0.01		1	1	0	2018	2018
Triple-Negative Breast Carcinoma	C4722518	IL2	3558	P60568	interleukin 2		950	0.336	0.885	0.47968	0.02		1	2	0	2011	2018
Triple-Negative Breast Carcinoma	C4722518	IL22	50616	Q9GZX6	interleukin 22		551	0.393	0.885	0.00018843	0.01		1	1	0	2018	2018
Triple-Negative Breast Carcinoma	C4722518	IL2RA	3559	P01589	interleukin 2 receptor subunit alpha	Receptor	540	0.389	0.885	0.054709	0.01		1	1	0	2019	2019
Triple-Negative Breast Carcinoma	C4722518	IL2RB	3560	P14784	interleukin 2 receptor subunit beta	Receptor	226	0.491	0.846	0.29095	0.01		1	1	0	2019	2019
Triple-Negative Breast Carcinoma	C4722518	IL2RG	3561	P31785	interleukin 2 receptor subunit gamma	Signaling	164	0.535	0.769	0.99152	0.01		1	1	0	2014	2014
Triple-Negative Breast Carcinoma	C4722518	IL6	3569	P05231	interleukin 6		2367	0.248	0.962	0.31536	0.1		1	11	0	2013	2019
Triple-Negative Breast Carcinoma	C4722518	IL6ST	3572	P40189	interleukin 6 signal transducer	Signaling	260	0.475	0.808	0.99978	0.02		1	2	0	2019	2019
Triple-Negative Breast Carcinoma	C4722518	ILRUN	64771	Q9H6K1	inflammation and lipid regulator with UBA-like and NBR1-like domains		34	0.705	0.385	0.85127	0.01		1	1	0	2015	2015
Triple-Negative Breast Carcinoma	C4722518	IMMP2L	83943	Q96T52	inner mitochondrial membrane peptidase subunit 2		55	0.628	0.577	0.011165	0.01		1	1	0	2018	2018
Triple-Negative Breast Carcinoma	C4722518	IMP3	55272	Q9NV31	IMP U3 small nucleolar ribonucleoprotein 3	Nucleic acid binding	97	0.566	0.462	1.5469e-07	0.06		1	6	0	2012	2018
Triple-Negative Breast Carcinoma	C4722518	INF2	64423	Q27J81	inverted formin, FH2 and WH2 domain containing		62	0.644	0.423	0.97346	0.01		1	1	0	2018	2018
Triple-Negative Breast Carcinoma	C4722518	ING2	3622	Q9H160	inhibitor of growth family member 2	Nucleic acid binding	76	0.599	0.654	0.72928	0.01		1	1	0	2018	2018
Triple-Negative Breast Carcinoma	C4722518	INPP4B	8821	O15327	inositol polyphosphate-4-phosphatase type II B		90	0.573	0.577	0.55218	0.01		1	1	0	2014	2014
Triple-Negative Breast Carcinoma	C4722518	IRAK1	3654	P51617	interleukin 1 receptor associated kinase 1	Kinase	200	0.506	0.808	0.98774	0.01		1	1	0	2015	2015
Triple-Negative Breast Carcinoma	C4722518	IRF1	3659	P10914	interferon regulatory factor 1	Transcription factor	257	0.468	0.769	0.9909	0.02		1	2	0	2012	2016
Triple-Negative Breast Carcinoma	C4722518	IRF9	10379	Q00978	interferon regulatory factor 9	Transcription factor	60	0.61	0.577	0.60773	0.01		1	1	0	2017	2017
Triple-Negative Breast Carcinoma	C4722518	ISG15	9636	P05161	ISG15 ubiquitin like modifier	Nucleic acid binding	148	0.531	0.808	0.40527	0.01		1	1	0	2014	2014
Triple-Negative Breast Carcinoma	C4722518	ISG20	3669	Q96AZ6	interferon stimulated exonuclease gene 20		414	0.414	0.846	0.002899	0.01		1	1	0	2019	2019
Triple-Negative Breast Carcinoma	C4722518	ISL1	3670	P61371	ISL LIM homeobox 1	Transcription factor	94	0.579	0.654	0.86857	0.03		1	3	0	2016	2018
Triple-Negative Breast Carcinoma	C4722518	ISYNA1	51477	Q9NPH2	inositol-3-phosphate synthase 1		168	0.51	0.769	2.4934e-05	0.02		1	2	0	2015	2015
Triple-Negative Breast Carcinoma	C4722518	ITCH	83737	Q96J02	itchy E3 ubiquitin protein ligase	Enzyme	123	0.556	0.769	0.99997	0.02		1	2	0	2019	2019
Triple-Negative Breast Carcinoma	C4722518	ITGA11	22801	Q9UKX5	integrin subunit alpha 11		34	0.678	0.5	8.661e-08	0.01		1	1	0	2019	2019
Triple-Negative Breast Carcinoma	C4722518	ITGA3	3675	P26006	integrin subunit alpha 3		111	0.573	0.731	3.5545e-07	0.01		1	1	0	2014	2014
Triple-Negative Breast Carcinoma	C4722518	ITGA5	3678	P08648	integrin subunit alpha 5		145	0.524	0.769	0.42455	0.02		1	2	0	2018	2019
Triple-Negative Breast Carcinoma	C4722518	ITGA6	3655	P23229	integrin subunit alpha 6		137	0.539	0.769	1.9014e-07	0.03		1	3	0	2013	2017
Triple-Negative Breast Carcinoma	C4722518	ITGA9	3680	Q13797	integrin subunit alpha 9		62	0.621	0.692	0.0081584	0.01		1	1	0	2019	2019
Triple-Negative Breast Carcinoma	C4722518	ITGAX	3687	P20702	integrin subunit alpha X		170	0.504	0.769	1.3665e-15	0.01		1	1	0	2019	2019
Triple-Negative Breast Carcinoma	C4722518	ITGB1	3688	P05556	integrin subunit beta 1	Receptor	210	0.496	0.808	0.98208	0.03		1	3	0	2016	2017
Triple-Negative Breast Carcinoma	C4722518	ITGB3	3690	P05106	integrin subunit beta 3	Receptor	260	0.485	0.846	0.0017189	0.01		1	1	0	2015	2015
Triple-Negative Breast Carcinoma	C4722518	ITGB4	3691	P16144	integrin subunit beta 4	Receptor	171	0.525	0.731	9.5287e-19	0.02		1	2	0	2017	2020
Triple-Negative Breast Carcinoma	C4722518	ITGB5	3693	P18084	integrin subunit beta 5	Receptor	43	0.656	0.577	9.8905e-08	0.01		1	1	0	2013	2013
Triple-Negative Breast Carcinoma	C4722518	ITK	3702	Q08881	IL2 inducible T cell kinase	Kinase	117	0.555	0.769	3.1402e-08	0.02		1	2	0	2019	2019
Triple-Negative Breast Carcinoma	C4722518	JAG1	182	P78504	jagged canonical Notch ligand 1		420	0.429	0.808	1	0.02		1	2	0	2017	2018
Triple-Negative Breast Carcinoma	C4722518	JAG2	3714	Q9Y219	jagged canonical Notch ligand 2		81	0.576	0.846	1	0.01		1	1	0	2018	2018
Triple-Negative Breast Carcinoma	C4722518	JAK1	3716	P23458	Janus kinase 1	Kinase	239	0.474	0.769	0.99998	0.01		1	1	0	2011	2011
Triple-Negative Breast Carcinoma	C4722518	JAK2	3717	O60674	Janus kinase 2	Kinase	644	0.385	0.885	0.65372	0.04		1	4	0	2017	2019
Triple-Negative Breast Carcinoma	C4722518	JMJD6	23210	Q6NYC1	jumonji domain containing 6, arginine demethylase and lysine hydroxylase	Receptor	73	0.615	0.654	0.93353	0.01		1	1	0	2019	2019
Triple-Negative Breast Carcinoma	C4722518	JMY	133746	Q8N9B5	junction mediating and regulatory protein, p53 cofactor		5	0.861	0.115	0.96031	0.01		1	1	0	2019	2019
Triple-Negative Breast Carcinoma	C4722518	JPT2	90861	Q9H910	Jupiter microtubule associated homolog 2		13	0.821	0.154	0.23277	0.01		1	1	0	2018	2018
Triple-Negative Breast Carcinoma	C4722518	JUN	3725	P05412	Jun proto-oncogene, AP-1 transcription factor subunit	Transcription factor	344	0.442	0.885	0.05962	0.01		1	1	0	2019	2019
Triple-Negative Breast Carcinoma	C4722518	JUNB	3726	P17275	JunB proto-oncogene, AP-1 transcription factor subunit	Transcription factor	264	0.467	0.769	0.86299	0.01		1	1	0	2019	2019
Triple-Negative Breast Carcinoma	C4722518	JUND	3727	P17535	JunD proto-oncogene, AP-1 transcription factor subunit	Transcription factor	242	0.475	0.808	0.70054	0.01		1	1	0	2019	2019
Triple-Negative Breast Carcinoma	C4722518	KAT5	10524	Q92993	lysine acetyltransferase 5		138	0.534	0.769	0.088234	0.01		1	1	0	2016	2016
Triple-Negative Breast Carcinoma	C4722518	KCNH4	23415	Q9UQ05	potassium voltage-gated channel subfamily H member 4	Ion channel	61	0.603	0.615	0.99984	0.01		1	1	0	2016	2016
Triple-Negative Breast Carcinoma	C4722518	KCNH8	131096	Q96L42	potassium voltage-gated channel subfamily H member 8	Ion channel	62	0.603	0.654	2.286e-10	0.01		1	1	0	2016	2016
Triple-Negative Breast Carcinoma	C4722518	KCNMB2	10242	Q9Y691	potassium calcium-activated channel subfamily M regulatory beta subunit 2	Ion channel	21	0.722	0.385	0.5544	0.01		1	1	0	2019	2019
Triple-Negative Breast Carcinoma	C4722518	KDM1A	23028	O60341	lysine demethylase 1A	Epigenetic regulator	185	0.512	0.808	0.99667	0.02		1	2	0	2015	2019
Triple-Negative Breast Carcinoma	C4722518	KDM2A	22992	Q9Y2K7	lysine demethylase 2A		53	0.636	0.423	1	0.01		1	1	0	2019	2019
Triple-Negative Breast Carcinoma	C4722518	KDM2B	84678	Q8NHM5	lysine demethylase 2B	Epigenetic regulator	86	0.592	0.692	1	0.01		1	1	0	2018	2018
Triple-Negative Breast Carcinoma	C4722518	KDM4C	23081	Q9H3R0	lysine demethylase 4C		71	0.601	0.615	6.5189e-07	0.01		1	1	0	2018	2018
Triple-Negative Breast Carcinoma	C4722518	KDM5A	5927	P29375	lysine demethylase 5A		69	0.597	0.731	1	0.01		1	1	0	2018	2018
Triple-Negative Breast Carcinoma	C4722518	KDM5B	10765	Q9UGL1	lysine demethylase 5B	Epigenetic regulator	162	0.532	0.731	7.9102e-15	0.02		1	2	0	2014	2019
Triple-Negative Breast Carcinoma	C4722518	KDM8	79831	Q8N371	lysine demethylase 8		19	0.743	0.231	2.5238e-05	0.01		1	1	0	2015	2015
Triple-Negative Breast Carcinoma	C4722518	KDR	3791	P35968	kinase insert domain receptor	Kinase	623	0.378	0.885	0.99982	0.08		0.875	8	0	2010	2019
Triple-Negative Breast Carcinoma	C4722518	KEAP1	9817	Q14145	kelch like ECH associated protein 1		251	0.475	0.808	0.00038766	0.01		1	1	0	2013	2013
Triple-Negative Breast Carcinoma	C4722518	KHDRBS1	10657	Q07666	KH RNA binding domain containing, signal transduction associated 1	Nucleic acid binding	289	0.457	0.846	0.99423	0.01		1	1	0	2012	2012
Triple-Negative Breast Carcinoma	C4722518	KHSRP	8570	Q92945	KH-type splicing regulatory protein	Enzyme	148	0.526	0.846	1	0.01		1	1	0	2019	2019
Triple-Negative Breast Carcinoma	C4722518	KIAA0100	9703	Q14667	KIAA0100		12	0.78	0.115	5.4421e-09	0.01		1	1	0	2014	2014
Triple-Negative Breast Carcinoma	C4722518	KIF11	3832	P52732	kinesin family member 11	Cellular structure	156	0.56	0.769	1	0.01		1	1	0	2017	2017
Triple-Negative Breast Carcinoma	C4722518	KIF14	9928	Q15058	kinesin family member 14	Cellular structure	103	0.578	0.654	4.1141e-05	0.02		1	2	0	2013	2014
Triple-Negative Breast Carcinoma	C4722518	KIF15	56992	Q9NS87	kinesin family member 15	Cellular structure	98	0.617	0.654	9.5235e-25	0.01		1	1	0	2019	2019
Triple-Negative Breast Carcinoma	C4722518	KIF22	3835	Q14807	kinesin family member 22	Cellular structure	150	0.552	0.654	9.1697e-10	0.03		1	3	0	2016	2018
Triple-Negative Breast Carcinoma	C4722518	KIF4A	24137	O95239	kinesin family member 4A	Cellular structure	50	0.647	0.462	0.99998	0.01		1	1	0	2019	2019
Triple-Negative Breast Carcinoma	C4722518	KIFC1	3833	Q9BW19	kinesin family member C1	Cellular structure	44	0.656	0.538	0.00065654	0.01		1	1	0	2017	2017
Triple-Negative Breast Carcinoma	C4722518	KIN	22944	O60870	Kin17 DNA and RNA binding protein		18	0.769	0.192	1.0187e-05	0.01		1	1	0	2019	2019
Triple-Negative Breast Carcinoma	C4722518	KISS1	3814	Q15726	KiSS-1 metastasis suppressor		179	0.507	0.808	0.49039	0.02		1	2	0	2017	2018
Triple-Negative Breast Carcinoma	C4722518	KISS1R	84634	Q969F8	KISS1 receptor	G-protein coupled receptor	195	0.515	0.769	0.43649	0.03		1	3	0	2017	2018
Triple-Negative Breast Carcinoma	C4722518	KIT	3815	P10721	KIT proto-oncogene, receptor tyrosine kinase	Kinase	715	0.366	0.808	0.98087	0.03		0.667	3	0	2012	2018
Triple-Negative Breast Carcinoma	C4722518	KL	9365	Q9UEF7	klotho	Enzyme	332	0.448	0.769	0.00022444	0.01		1	1	0	2016	2016
Triple-Negative Breast Carcinoma	C4722518	KLB	152831	Q86Z14	klotho beta	Enzyme	53	0.647	0.5	0.036433	0.01		1	1	0	2016	2016
Triple-Negative Breast Carcinoma	C4722518	KLF4	9314	O43474	Kruppel like factor 4	Nucleic acid binding	307	0.449	0.769	0.99714	0.01		1	1	0	2017	2017
Triple-Negative Breast Carcinoma	C4722518	KLF5	688	Q13887	Kruppel like factor 5	Nucleic acid binding	143	0.534	0.769	0.8181	0.07		1	7	0	2017	2018
Triple-Negative Breast Carcinoma	C4722518	KLK1	3816	P06870	kallikrein 1	Enzyme	132	0.533	0.769	0.00015311	0.01		1	1	0	2017	2017
Triple-Negative Breast Carcinoma	C4722518	KLK4	9622	Q9Y5K2	kallikrein related peptidase 4	Enzyme	110	0.559	0.692	4.5377e-06	0.01		1	1	0	2017	2017
Triple-Negative Breast Carcinoma	C4722518	KLK5	25818	Q9Y337	kallikrein related peptidase 5	Enzyme	59	0.623	0.462	0.0070149	0.01		1	1	0	2015	2015
Triple-Negative Breast Carcinoma	C4722518	KLRB1	3820	Q12918	killer cell lectin like receptor B1		71	0.601	0.615	2.4129e-07	0.01		1	1	0	2018	2018
Triple-Negative Breast Carcinoma	C4722518	KLRC4-KLRK1	100528032	P26718	KLRC4-KLRK1 readthrough		246	0.469	0.769		0.01		1	1	0	2018	2018
Triple-Negative Breast Carcinoma	C4722518	KLRK1	22914	P26718	killer cell lectin like receptor K1		255	0.467	0.769	6.9812e-14	0.01		1	1	0	2018	2018
Triple-Negative Breast Carcinoma	C4722518	KNG1	3827	P01042	kininogen 1	Enzyme modulator	279	0.481	0.885	3.2071e-10	0.01		1	1	0	2018	2018
Triple-Negative Breast Carcinoma	C4722518	KRAS	3845	P01116	KRAS proto-oncogene, GTPase	Enzyme modulator	1213	0.32	0.923	0.00078803	0.05		1	5	0	2010	2019
Triple-Negative Breast Carcinoma	C4722518	KRT20	54474	P35900	keratin 20		559	0.388	0.846	9.0776e-11	0.01		1	1	0	2013	2013
Triple-Negative Breast Carcinoma	C4722518	KRT5	3852	P13647	keratin 5		203	0.512	0.731	0.64172	0.05		1	5	0	2016	2018
Triple-Negative Breast Carcinoma	C4722518	LAG3	3902	P18627	lymphocyte activating 3	Receptor	154	0.517	0.692	0.27623	0.02		1	2	0	2018	2020
Triple-Negative Breast Carcinoma	C4722518	LAMA4	3910	Q16363	laminin subunit alpha 4		44	0.682	0.577	1.3909e-24	0.01		1	1	0	2018	2018
Triple-Negative Breast Carcinoma	C4722518	LAPTM4B	55353	Q86VI4	lysosomal protein transmembrane 4 beta	Transporter	88	0.579	0.692	4.2764e-13	0.01		1	1	0	2019	2019
Triple-Negative Breast Carcinoma	C4722518	LASP1	3927	Q14847	LIM and SH3 protein 1		85	0.572	0.615	0.9827	0.01		1	1	0	2012	2012
Triple-Negative Breast Carcinoma	C4722518	LATS1	9113	O95835	large tumor suppressor kinase 1	Kinase	99	0.563	0.731	0.99987	0.01		1	1	0	2017	2017
Triple-Negative Breast Carcinoma	C4722518	LCN2	3934	P80188	lipocalin 2	Enzyme	497	0.405	0.885	1.1404e-09	0.02		1	2	0	2014	2019
Triple-Negative Breast Carcinoma	C4722518	LDHA	3939	P00338	lactate dehydrogenase A	Enzyme	185	0.507	0.808	0.069173	0.05		1	5	0	2016	2018
Triple-Negative Breast Carcinoma	C4722518	LDHB	3945	P07195	lactate dehydrogenase B	Enzyme	74	0.604	0.615	4.9734e-06	0.01		1	1	0	2012	2012
Triple-Negative Breast Carcinoma	C4722518	LDLR	3949	P01130	low density lipoprotein receptor		336	0.449	0.885	9.841e-24	0.01		1	1	0	2018	2018
Triple-Negative Breast Carcinoma	C4722518	LEP	3952	P41159	leptin		931	0.349	0.846	0.46491	0.04		1	4	0	2017	2019
Triple-Negative Breast Carcinoma	C4722518	LEPR	3953	P48357	leptin receptor	Signaling	416	0.433	0.808	0.99475	0.04		1	4	0	2013	2018
Triple-Negative Breast Carcinoma	C4722518	LGALS1	3956	P09382	galectin 1	Signaling	362	0.435	0.846	0.004488	0.01		1	1	0	2017	2017
Triple-Negative Breast Carcinoma	C4722518	LGALS3	3958	P17931	galectin 3	Signaling	557	0.392	0.846	2.3207e-05	0.01		1	1	0	2014	2014
Triple-Negative Breast Carcinoma	C4722518	LGALS8	3964	O00214	galectin 8	Signaling	51	0.628	0.615	3.8769e-06	0.01		1	1	0	2019	2019
Triple-Negative Breast Carcinoma	C4722518	LGALS9	3965	O00182	galectin 9	Signaling	197	0.496	0.769	6.548e-06	0.01		1	1	0	2018	2018
Triple-Negative Breast Carcinoma	C4722518	LGR5	8549	O75473	leucine rich repeat containing G protein-coupled receptor 5	G-protein coupled receptor	131	0.542	0.654	2.5019e-08	0.01		1	1	0	2018	2018
Triple-Negative Breast Carcinoma	C4722518	LGR6	59352	Q9HBX8	leucine rich repeat containing G protein-coupled receptor 6	G-protein coupled receptor	209	0.502	0.923	2.9439e-06	0.01		1	1	0	2014	2014
Triple-Negative Breast Carcinoma	C4722518	LIFR	3977	P42702	LIF receptor subunit alpha	Signaling	198	0.523	0.808	1.4888e-13	0.01		1	1	0	2019	2019
Triple-Negative Breast Carcinoma	C4722518	LILRB1	10859	Q8NHL6	leukocyte immunoglobulin like receptor B1	Receptor	168	0.51	0.769	5.6502e-14	0.01		1	1	0	2019	2019
Triple-Negative Breast Carcinoma	C4722518	LIMK1	3984	P53667	LIM domain kinase 1	Kinase	271	0.488	0.731	0.99937	0.02		1	2	0	2017	2017
Triple-Negative Breast Carcinoma	C4722518	LIN28A	79727	Q9H9Z2	lin-28 homolog A	Nucleic acid binding	161	0.523	0.731	0.019369	0.01		1	1	0	2018	2018
Triple-Negative Breast Carcinoma	C4722518	LIN9	286826	Q5TKA1	lin-9 DREAM MuvB core complex component	Nucleic acid binding	20	0.743	0.346	0.99771	0.01		1	1	0	2017	2017
Triple-Negative Breast Carcinoma	C4722518	LINC00299	339789	Q6ZSB3	long intergenic non-protein coding RNA 299		25	0.743	0.346		0.01		1	1	0	2019	2019
Triple-Negative Breast Carcinoma	C4722518	LINC00328	51152		long intergenic non-protein coding RNA 328		64	0.608	0.692		0.01		1	1	0	2016	2016
Triple-Negative Breast Carcinoma	C4722518	LINC00339	29092		long intergenic non-protein coding RNA 339		28	0.695	0.346		0.01		1	1	0	2019	2019
Triple-Negative Breast Carcinoma	C4722518	LINC00511	400619		long intergenic non-protein coding RNA 511		47	0.638	0.423		0.01		1	1	0	2019	2019
Triple-Negative Breast Carcinoma	C4722518	LINC00908	284276		long intergenic non-protein coding RNA 908		6	0.89	0.115		0.01		1	1	0	2020	2020
Triple-Negative Breast Carcinoma	C4722518	LINC00993	101929520		long intergenic non-protein coding RNA 993		17	0.729	0.269		0.01		1	1	0	2019	2019
Triple-Negative Breast Carcinoma	C4722518	LINC01096	285548		long intergenic non-protein coding RNA 1096		3	0.931	0.077		0.01		1	1	0	2019	2019
Triple-Negative Breast Carcinoma	C4722518	LINC01139	339535		long intergenic non-protein coding RNA 1139		30	0.691	0.538		0.09		0.889	9	0	2016	2019
Triple-Negative Breast Carcinoma	C4722518	LINC01194	404663		long intergenic non-protein coding RNA 1194		249	0.47	0.769		0.02		1	2	0	2012	2018
Triple-Negative Breast Carcinoma	C4722518	LINC01638	105372978		long intergenic non-protein coding RNA 1638		25	0.722	0.346		0.03		1	3	0	2018	2019
Triple-Negative Breast Carcinoma	C4722518	LINC01672	100505887		long intergenic non-protein coding RNA 1672		268	0.462	0.846		0.01		1	1	0	2018	2018
Triple-Negative Breast Carcinoma	C4722518	LINC-ROR	100885779		long intergenic non-protein coding RNA, regulator of reprogramming		108	0.548	0.769		0.01		1	1	0	2018	2018
Triple-Negative Breast Carcinoma	C4722518	LINP1	108570035		lncRNA in non-homologous end joining pathway 1		19	0.729	0.231		0.01		1	1	0	2018	2018
Triple-Negative Breast Carcinoma	C4722518	LIPG	9388	Q9Y5X9	lipase G, endothelial type	Enzyme	62	0.633	0.615	1.0165e-10	0.01		1	1	0	2018	2018
Triple-Negative Breast Carcinoma	C4722518	LMNA	4000	P02545	lamin A/C		824	0.384	0.885	0.9994	0.03		1	3	0	2014	2019
Triple-Negative Breast Carcinoma	C4722518	LNCNEF	101929685		lncRNA neighboring enhancer of FOXA2		24	0.716	0.231		0.01		1	1	0	2019	2019
Triple-Negative Breast Carcinoma	C4722518	LNPK	80856	Q9C0E8	lunapark, ER junction formation factor		31	0.716	0.346	0.00062151	0.01		1	1	0	2018	2018
Triple-Negative Breast Carcinoma	C4722518	LONP1	9361	P36776	lon peptidase 1, mitochondrial	Enzyme	197	0.517	0.808	0.9993	0.01		1	1	0	2019	2019
Triple-Negative Breast Carcinoma	C4722518	LOXL2	4017	Q9Y4K0	lysyl oxidase like 2		149	0.527	0.731	3.3844e-07	0.01		1	1	0	2020	2020
Triple-Negative Breast Carcinoma	C4722518	LOXL4	84171	Q96JB6	lysyl oxidase like 4		46	0.65	0.423	9.1912e-20	0.01		1	1	0	2017	2017
Triple-Negative Breast Carcinoma	C4722518	LPA	4018	P08519	lipoprotein(a)	Enzyme	340	0.444	0.769	6.5917e-89	0.01		1	1	0	2018	2018
Triple-Negative Breast Carcinoma	C4722518	LPAR1	1902	Q92633	lysophosphatidic acid receptor 1	G-protein coupled receptor	145	0.534	0.808	0.18603	0.02		1	2	0	2018	2019
Triple-Negative Breast Carcinoma	C4722518	LPAR2	9170	Q9HBW0	lysophosphatidic acid receptor 2	G-protein coupled receptor	285	0.463	0.846	0.036658	0.01		1	1	0	2014	2014
Triple-Negative Breast Carcinoma	C4722518	LPAR3	23566	Q9UBY5	lysophosphatidic acid receptor 3	G-protein coupled receptor	194	0.509	0.923	0.67935	0.01		1	1	0	2014	2014
Triple-Negative Breast Carcinoma	C4722518	LPIN1	23175	Q14693	lipin 1		86	0.601	0.692	6.4522e-13	0.01		1	1	0	2017	2017
Triple-Negative Breast Carcinoma	C4722518	LRG1	116844	P02750	leucine rich alpha-2-glycoprotein 1		109	0.564	0.731	0.095143	0.01		1	1	0	2019	2019
Triple-Negative Breast Carcinoma	C4722518	LRP1	4035	Q07954	LDL receptor related protein 1		252	0.482	0.769	1	0.01		1	1	0	2019	2019
Triple-Negative Breast Carcinoma	C4722518	LRP5	4041	O75197	LDL receptor related protein 5		283	0.485	0.846	0.50992	0.01		1	1	0	2019	2019
Triple-Negative Breast Carcinoma	C4722518	LRP6	4040	O75581	LDL receptor related protein 6		134	0.536	0.808	0.69664	0.04		1	4	0	2012	2019
Triple-Negative Breast Carcinoma	C4722518	LRP8	7804	Q14114	LDL receptor related protein 8		55	0.644	0.346	0.99983	0.01		1	1	0	2018	2018
Triple-Negative Breast Carcinoma	C4722518	LRPPRC	10128	P42704	leucine rich pentatricopeptide repeat containing		220	0.493	0.769	2.3019e-10	0.02		1	2	0	2019	2019
Triple-Negative Breast Carcinoma	C4722518	LRRC26	389816	Q2I0M4	leucine rich repeat containing 26		14	0.792	0.269	0.012698	0.01		1	1	0	2018	2018
Triple-Negative Breast Carcinoma	C4722518	LTB4R2	56413	Q9NPC1	leukotriene B4 receptor 2	G-protein coupled receptor	49	0.631	0.615	1.3821e-05	0.01		1	1	0	2018	2018
Triple-Negative Breast Carcinoma	C4722518	LUCAT1	100505994		lung cancer associated transcript 1		60	0.612	0.577		0.01		1	1	0	2019	2019
Triple-Negative Breast Carcinoma	C4722518	LY75	4065	O60449	lymphocyte antigen 75		40	0.67	0.538	7.4472e-46	0.01		1	1	0	2019	2019
Triple-Negative Breast Carcinoma	C4722518	LY75-CD302	100526664	O60449	LY75-CD302 readthrough		29	0.711	0.423	7.4472e-46	0.01		1	1	0	2019	2019
Triple-Negative Breast Carcinoma	C4722518	LZTS1	11178	Q9Y250	leucine zipper tumor suppressor 1		50	0.633	0.385	0.95491	0.01		1	1	0	2019	2019
Triple-Negative Breast Carcinoma	C4722518	MAFK	7975	O60675	MAF bZIP transcription factor K	Transcription factor	81	0.592	0.654	0.71128	0.01		1	1	0	2017	2017
Triple-Negative Breast Carcinoma	C4722518	MAGEA2	4101	P43356	MAGE family member A2		38	0.663	0.385		0.01		1	1	0	2017	2017
Triple-Negative Breast Carcinoma	C4722518	MALAT1	378938		metastasis associated lung adenocarcinoma transcript 1		336	0.435	0.846		0.02		1	2	0	2016	2017
Triple-Negative Breast Carcinoma	C4722518	MAOB	4129	P27338	monoamine oxidase B		152	0.533	0.808	0.99903	0.01		1	1	0	2017	2017
Triple-Negative Breast Carcinoma	C4722518	MAP1LC3A	84557	Q9H492	microtubule associated protein 1 light chain 3 alpha	Cellular structure	67	0.61	0.654	0.027922	0.02		1	2	0	2013	2013
Triple-Negative Breast Carcinoma	C4722518	MAP1LC3B	81631	Q9GZQ8	microtubule associated protein 1 light chain 3 beta	Cellular structure	167	0.506	0.846	0.0019065	0.02		1	2	0	2012	2013
Triple-Negative Breast Carcinoma	C4722518	MAP2K1	5604	Q02750	mitogen-activated protein kinase kinase 1	Kinase	389	0.439	0.846	0.89669	0.04		1	4	0	2012	2017
Triple-Negative Breast Carcinoma	C4722518	MAP2K5	5607	Q13163	mitogen-activated protein kinase kinase 5	Kinase	70	0.628	0.654	0.004765	0.01		1	1	0	2020	2020
Triple-Negative Breast Carcinoma	C4722518	MAP2K7	5609	O14733	mitogen-activated protein kinase kinase 7	Kinase	408	0.419	0.808	0.99552	0.09		1	9	0	2012	2019
Triple-Negative Breast Carcinoma	C4722518	MAP3K11	4296	Q16584	mitogen-activated protein kinase kinase kinase 11	Kinase	74	0.597	0.615	0.010875	0.01		1	1	0	2017	2017
Triple-Negative Breast Carcinoma	C4722518	MAP3K2	10746	Q9Y2U5	mitogen-activated protein kinase kinase kinase 2	Kinase	37	0.686	0.231	0.99999	0.01		1	1	0	2017	2017
Triple-Negative Breast Carcinoma	C4722518	MAP3K21	84451	Q5TCX8	mitogen-activated protein kinase kinase kinase 21	Kinase	19	0.751	0.154	1.0441e-06	0.01		1	1	0	2019	2019
Triple-Negative Breast Carcinoma	C4722518	MAP3K7	6885	O43318	mitogen-activated protein kinase kinase kinase 7	Kinase	273	0.477	0.808	0.99971	0.02		1	2	0	2017	2018
Triple-Negative Breast Carcinoma	C4722518	MAPK1	5594	P28482	mitogen-activated protein kinase 1	Kinase	1059	0.33	0.923	0.99698	0.1		1	17	0	2012	2019
Triple-Negative Breast Carcinoma	C4722518	MAPK13	5603	O15264	mitogen-activated protein kinase 13	Kinase	26	0.705	0.577	6.7197e-11	0.01		1	1	0	2014	2014
Triple-Negative Breast Carcinoma	C4722518	MAPK14	1432	Q16539	mitogen-activated protein kinase 14	Kinase	626	0.379	0.923	0.37466	0.03		1	3	0	2018	2019
Triple-Negative Breast Carcinoma	C4722518	MAPK3	5595	P27361	mitogen-activated protein kinase 3	Kinase	647	0.379	0.885	0.036884	0.1		0.909	11	0	2014	2019
Triple-Negative Breast Carcinoma	C4722518	MAPK7	5598	Q13164	mitogen-activated protein kinase 7	Kinase	127	0.553	0.654	0.0031023	0.01		1	1	0	2020	2020
Triple-Negative Breast Carcinoma	C4722518	MAPK8	5599	P45983	mitogen-activated protein kinase 8	Kinase	520	0.397	0.885	0.99823	0.03		1	3	0	2017	2018
Triple-Negative Breast Carcinoma	C4722518	MAPK8IP2	23542	Q13387	mitogen-activated protein kinase 8 interacting protein 2	Signaling	51	0.628	0.654	0.99997	0.01		1	1	0	2019	2019
Triple-Negative Breast Carcinoma	C4722518	MAPK9	5601	P45984	mitogen-activated protein kinase 9	Kinase	115	0.561	0.731	0.069738	0.02		1	2	0	2017	2018
Triple-Negative Breast Carcinoma	C4722518	MAPT-AS1	100128977		MAPT antisense RNA 1		34	0.711	0.269		0.01		1	1	0	2019	2019
Triple-Negative Breast Carcinoma	C4722518	MAS1	4142	P04201	MAS1 proto-oncogene, G protein-coupled receptor	G-protein coupled receptor	142	0.533	0.769	8.2518e-05	0.01		1	1	0	2015	2015
Triple-Negative Breast Carcinoma	C4722518	MAT2B	27430	Q9NZL9	methionine adenosyltransferase 2B		48	0.644	0.5	0.046226	0.01		1	1	0	2019	2019
Triple-Negative Breast Carcinoma	C4722518	MATN1	4146	P21941	matrilin 1	Receptor	45	0.644	0.615	0.0025559	0.01		1	1	0	2016	2016
Triple-Negative Breast Carcinoma	C4722518	MBD2	8932	Q9UBB5	methyl-CpG binding domain protein 2	Epigenetic regulator	256	0.466	0.846	0.34957	0.04		1	4	0	2018	2019
Triple-Negative Breast Carcinoma	C4722518	MCAM	4162	P43121	melanoma cell adhesion molecule	Cell adhesion	169	0.514	0.731	0.00015954	0.01		1	1	0	2012	2012
Triple-Negative Breast Carcinoma	C4722518	MCAT	27349	Q8IVS2	malonyl-CoA-acyl carrier protein transacylase		147	0.524	0.808	0.00030611	0.02		1	2	0	2018	2019
Triple-Negative Breast Carcinoma	C4722518	MCL1	4170	Q07820	MCL1 apoptosis regulator, BCL2 family member	Signaling	375	0.43	0.808	0.96349	0.1		0.857	14	0	2013	2019
Triple-Negative Breast Carcinoma	C4722518	MCOLN1	57192	Q9GZU1	mucolipin 1	Ion channel	102	0.601	0.654	0.00058027	0.01		1	1	0	2019	2019
Triple-Negative Breast Carcinoma	C4722518	MCTS1	28985	Q9ULC4	MCTS1 re-initiation and release factor	Receptor	109	0.552	0.692	0.87474	0.02		1	2	0	2018	2019
Triple-Negative Breast Carcinoma	C4722518	MDM2	4193	Q00987	MDM2 proto-oncogene	Nucleic acid binding	702	0.362	0.846	0.99981	0.06		1	6	0	2014	2019
Triple-Negative Breast Carcinoma	C4722518	MDM4	4194	O15151	MDM4 regulator of p53	Nucleic acid binding	265	0.461	0.808	0.99992	0.03		1	3	0	2013	2019
Triple-Negative Breast Carcinoma	C4722518	MECOM	2122	Q03112	MDS1 and EVI1 complex locus		191	0.513	0.731	1	0.02		1	2	0	2017	2019
Triple-Negative Breast Carcinoma	C4722518	MED1	5469	Q15648	mediator complex subunit 1		88	0.573	0.692	1	0.01		1	1	0	2016	2016
Triple-Negative Breast Carcinoma	C4722518	MED12	9968	Q93074	mediator complex subunit 12	Transcription factor	340	0.476	0.769	1	0.01		1	1	0	2018	2018
Triple-Negative Breast Carcinoma	C4722518	MELK	9833	Q14680	maternal embryonic leucine zipper kinase	Kinase	94	0.566	0.577	4.5055e-22	0.04		1	4	0	2017	2018
Triple-Negative Breast Carcinoma	C4722518	MERTK	10461	Q12866	MER proto-oncogene, tyrosine kinase	Kinase	154	0.531	0.692	2.6593e-11	0.02		1	2	0	2016	2018
Triple-Negative Breast Carcinoma	C4722518	MESD	23184	Q14696	mesoderm development LRP chaperone		9	0.805	0.192	0.62773	0.01		1	1	0	2017	2017
Triple-Negative Breast Carcinoma	C4722518	MET	4233	P08581	MET proto-oncogene, receptor tyrosine kinase	Kinase	594	0.38	0.846	0.96998	0.1		0.923	13	2	2014	2019
Triple-Negative Breast Carcinoma	C4722518	MFAP1	4236	P55081	microfibril associated protein 1	Extracellular structure	357	0.431	0.846	0.79602	0.03		1	3	0	2015	2019
Triple-Negative Breast Carcinoma	C4722518	MFT2	100188881		Trichoepithelioma, multiple familial, 2		75	0.601	0.692		0.01		1	1	0	2017	2017
Triple-Negative Breast Carcinoma	C4722518	MGMT	4255	P16455	O-6-methylguanine-DNA methyltransferase		444	0.412	0.885	1.1756e-07	0.03		1	3	0	2012	2014
Triple-Negative Breast Carcinoma	C4722518	MGP	4256	P08493	matrix Gla protein		160	0.539	0.846	3.6072e-05	0.01		1	1	0	2019	2019
Triple-Negative Breast Carcinoma	C4722518	MIR100HG	399959		mir-100-let-7a-2-mir-125b-1 cluster host gene		37	0.682	0.308		0.01		1	1	0	2018	2018
Triple-Negative Breast Carcinoma	C4722518	MIR106A	406899		microRNA 106a		140	0.524	0.846		0.01		1	1	0	2017	2017
Triple-Negative Breast Carcinoma	C4722518	MIR106B	406900		microRNA 106b		143	0.523	0.808		0.01		1	1	0	2018	2018
Triple-Negative Breast Carcinoma	C4722518	MIR107	406901		microRNA 107		123	0.543	0.769		0.01		1	1	0	2016	2016
Triple-Negative Breast Carcinoma	C4722518	MIR10B	406903		microRNA 10b		167	0.509	0.808		0.04		1	4	0	2014	2020
Triple-Negative Breast Carcinoma	C4722518	MIR1180	100302256		microRNA 1180		20	0.716	0.269		0.01		1	1	0	2018	2018
Triple-Negative Breast Carcinoma	C4722518	MIR1207	100302175		microRNA 1207		31	0.686	0.538		0.01		1	1	0	2019	2019
Triple-Negative Breast Carcinoma	C4722518	MIR122	406906		microRNA 122		250	0.468	0.808		0.01		1	1	0	2020	2020
Triple-Negative Breast Carcinoma	C4722518	MIR126	406913		microRNA 126		305	0.447	0.846		0.02		1	2	0	2015	2019
Triple-Negative Breast Carcinoma	C4722518	MIR127	406914		microRNA 127		105	0.553	0.692		0.01		1	1	0	2020	2020
Triple-Negative Breast Carcinoma	C4722518	MIR1287	100302133		microRNA 1287		15	0.769	0.192		0.01		1	1	0	2019	2019
Triple-Negative Breast Carcinoma	C4722518	MIR1296	100302150		microRNA 1296		17	0.736	0.231		0.02		1	2	0	2016	2017
Triple-Negative Breast Carcinoma	C4722518	MIR1299	100302167		microRNA 1299		14	0.76	0.346		0.02		1	2	0	2018	2020
Triple-Negative Breast Carcinoma	C4722518	MIR1301	100302246		microRNA 1301		28	0.711	0.269		0.01		1	1	0	2018	2018
Triple-Negative Breast Carcinoma	C4722518	MIR130A	406919		microRNA 130a		141	0.522	0.808		0.02		1	2	0	2014	2018
Triple-Negative Breast Carcinoma	C4722518	MIR130B	406920		microRNA 130b		115	0.547	0.808		0.01		1	1	0	2015	2015
Triple-Negative Breast Carcinoma	C4722518	MIR134	406924		microRNA 134		126	0.542	0.769		0.01		1	1	0	2015	2015
Triple-Negative Breast Carcinoma	C4722518	MIR135B	442891		microRNA 135b		111	0.554	0.731		0.03		1	3	0	2018	2019
Triple-Negative Breast Carcinoma	C4722518	MIR136	406927		microRNA 136		79	0.584	0.731		0.01		1	1	0	2016	2016
Triple-Negative Breast Carcinoma	C4722518	MIR137	406928		microRNA 137		171	0.513	0.846		0.02		1	2	0	2018	2019
Triple-Negative Breast Carcinoma	C4722518	MIR140	406932		microRNA 140		144	0.522	0.769		0.01		1	1	0	2019	2019
Triple-Negative Breast Carcinoma	C4722518	MIR141	406933		microRNA 141		179	0.497	0.808		0.01		1	1	0	2015	2015
Triple-Negative Breast Carcinoma	C4722518	MIR143	406935		microRNA 143		267	0.462	0.885		0.02		1	2	0	2017	2019
Triple-Negative Breast Carcinoma	C4722518	MIR145	406937		microRNA 145		366	0.431	0.846		0.07		1	7	0	2015	2019
Triple-Negative Breast Carcinoma	C4722518	MIR146A	406938		microRNA 146a		505	0.398	0.885		0.07		1	7	0	2014	2020
Triple-Negative Breast Carcinoma	C4722518	MIR148A	406940		microRNA 148a		172	0.506	0.846		0.02		1	2	0	2015	2016
Triple-Negative Breast Carcinoma	C4722518	MIR155	406947		microRNA 155		584	0.384	0.885		0.04		1	4	0	2014	2019
Triple-Negative Breast Carcinoma	C4722518	MIR17	406952		microRNA 17		270	0.459	0.846		0.07		1	7	0	2014	2019
Triple-Negative Breast Carcinoma	C4722518	MIR17HG	407975	Q75NE6	miR-17-92a-1 cluster host gene		224	0.483	0.808		0.01		1	1	0	2014	2014
Triple-Negative Breast Carcinoma	C4722518	MIR182	406958		microRNA 182		211	0.486	0.846		0.05		1	5	0	2013	2019
Triple-Negative Breast Carcinoma	C4722518	MIR183	406959		microRNA 183		190	0.494	0.885		0.01		1	1	0	2018	2018
Triple-Negative Breast Carcinoma	C4722518	MIR184	406960		microRNA 184		119	0.542	0.769		0.01		1	1	0	2015	2015
Triple-Negative Breast Carcinoma	C4722518	MIR185	406961		microRNA 185		106	0.551	0.808		0.01		1	1	0	2014	2014
Triple-Negative Breast Carcinoma	C4722518	MIR18A	406953		microRNA 18a		154	0.52	0.846		0.01		1	1	0	2016	2016
Triple-Negative Breast Carcinoma	C4722518	MIR190A	406965		microRNA 190a		44	0.65	0.423		0.01		1	1	0	2014	2014
Triple-Negative Breast Carcinoma	C4722518	MIR193B	574455		microRNA 193b		117	0.536	0.808		0.01		1	1	0	2014	2014
Triple-Negative Breast Carcinoma	C4722518	MIR195	406971		microRNA 195		180	0.496	0.769		0.03		1	3	0	2016	2019
Triple-Negative Breast Carcinoma	C4722518	MIR197	406974		microRNA 197		93	0.565	0.615		0.02		1	2	0	2018	2019
Triple-Negative Breast Carcinoma	C4722518	MIR199B	406978		microRNA 199b		71	0.588	0.615		0.01		1	1	0	2018	2018
Triple-Negative Breast Carcinoma	C4722518	MIR19B1	406980		microRNA 19b-1		144	0.529	0.769		0.01		1	1	0	2018	2018
Triple-Negative Breast Carcinoma	C4722518	MIR200A	406983		microRNA 200a		156	0.519	0.808		0.04		1	4	0	2013	2018
Triple-Negative Breast Carcinoma	C4722518	MIR200B	406984		microRNA 200b		180	0.5	0.769		0.05		1	5	0	2014	2019
Triple-Negative Breast Carcinoma	C4722518	MIR200C	406985		microRNA 200c		202	0.486	0.846		0.08		1	8	0	2011	2020
Triple-Negative Breast Carcinoma	C4722518	MIR203A	406986		microRNA 203a		237	0.471	0.808		0.02		1	2	0	2012	2018
Triple-Negative Breast Carcinoma	C4722518	MIR204	406987		microRNA 204		203	0.487	0.808		0.02		1	2	0	2018	2018
Triple-Negative Breast Carcinoma	C4722518	MIR205	406988		microRNA 205		210	0.482	0.846		0.07		0.857	7	0	2012	2019
Triple-Negative Breast Carcinoma	C4722518	MIR206	406989		microRNA 206		226	0.477	0.846		0.06		1	6	0	2014	2019
Triple-Negative Breast Carcinoma	C4722518	MIR20A	406982		microRNA 20a		180	0.498	0.769		0.01		1	1	0	2018	2018
Triple-Negative Breast Carcinoma	C4722518	MIR21	406991		microRNA 21		726	0.363	0.846		0.1		1	12	0	2014	2020
Triple-Negative Breast Carcinoma	C4722518	MIR210	406992		microRNA 210		277	0.46	0.846		0.04		1	4	0	2012	2020
Triple-Negative Breast Carcinoma	C4722518	MIR211	406993		microRNA 211		106	0.552	0.577		0.02		1	2	0	2015	2017
Triple-Negative Breast Carcinoma	C4722518	MIR212	406994		microRNA 212		126	0.535	0.808		0.01		1	1	0	2017	2017
Triple-Negative Breast Carcinoma	C4722518	MIR214	406996		microRNA 214		221	0.48	0.808		0.03		1	3	0	2019	2019
Triple-Negative Breast Carcinoma	C4722518	MIR217	406999		microRNA 217		116	0.543	0.769		0.01		1	1	0	2017	2017
Triple-Negative Breast Carcinoma	C4722518	MIR221	407006		microRNA 221		304	0.449	0.846		0.05		1	5	0	2016	2019
Triple-Negative Breast Carcinoma	C4722518	MIR224	407009		microRNA 224		128	0.534	0.654		0.01		1	1	0	2019	2019
Triple-Negative Breast Carcinoma	C4722518	MIR25	407014		microRNA 25		148	0.517	0.769		0.01		1	1	0	2018	2018
Triple-Negative Breast Carcinoma	C4722518	MIR26B	407017		microRNA 26b		128	0.529	0.808		0.01		1	1	0	2019	2019
Triple-Negative Breast Carcinoma	C4722518	MIR27A	407018		microRNA 27a		248	0.466	0.846		0.02		1	2	0	2015	2018
Triple-Negative Breast Carcinoma	C4722518	MIR27B	407019		microRNA 27b		141	0.529	0.769		0.02		1	2	0	2014	2015
Triple-Negative Breast Carcinoma	C4722518	MIR296	407022		microRNA 296		95	0.564	0.654		0.01		1	1	0	2019	2019
Triple-Negative Breast Carcinoma	C4722518	MIR29B1	407024		microRNA 29b-1		212	0.485	0.846		0.03		1	3	0	2017	2020
Triple-Negative Breast Carcinoma	C4722518	MIR29B2	407025		microRNA 29b-2		214	0.484	0.885		0.01		1	1	0	2019	2019
Triple-Negative Breast Carcinoma	C4722518	MIR301A	407027		microRNA 301a		102	0.558	0.808		0.01		1	1	0	2019	2019
Triple-Negative Breast Carcinoma	C4722518	MIR301B	100126318		microRNA 301b		34	0.674	0.423		0.01		1	1	0	2018	2018
Triple-Negative Breast Carcinoma	C4722518	MIR302A	407028		microRNA 302a		65	0.601	0.5		0.01		1	1	0	2016	2016
Triple-Negative Breast Carcinoma	C4722518	MIR30A	407029		microRNA 30a		218	0.478	0.808		0.01		1	1	0	2018	2018
Triple-Negative Breast Carcinoma	C4722518	MIR31	407035		microRNA 31		235	0.471	0.769		0.02		1	2	0	2012	2016
Triple-Negative Breast Carcinoma	C4722518	MIR3164	100422846		microRNA 3164		2	0.931	0.077		0.01		1	1	0	2019	2019
Triple-Negative Breast Carcinoma	C4722518	MIR3178	100422974		microRNA 3178		8	0.861	0.115		0.01		1	1	0	2018	2018
Triple-Negative Breast Carcinoma	C4722518	MIR3182	100422853		microRNA 3182		5	0.839	0.115		0.01		1	1	0	2018	2018
Triple-Negative Breast Carcinoma	C4722518	MIR328	442901		microRNA 328		99	0.558	0.769		0.01		1	1	0	2018	2018
Triple-Negative Breast Carcinoma	C4722518	MIR335	442904		microRNA 335		141	0.521	0.808		0.02		1	2	0	2019	2020
Triple-Negative Breast Carcinoma	C4722518	MIR33A	407039		microRNA 33a		100	0.56	0.654		0.02		1	2	0	2019	2019
Triple-Negative Breast Carcinoma	C4722518	MIR340	442908		microRNA 340		99	0.561	0.692		0.02		1	2	0	2017	2017
Triple-Negative Breast Carcinoma	C4722518	MIR342	442909		microRNA 342		111	0.547	0.769		0.02		1	2	0	2012	2018
Triple-Negative Breast Carcinoma	C4722518	MIR34A	407040		microRNA 34a		428	0.421	0.846		0.1		1	12	1	2014	2020
Triple-Negative Breast Carcinoma	C4722518	MIR34B	407041		microRNA 34b		165	0.509	0.808		0.02		1	2	1	2012	2017
Triple-Negative Breast Carcinoma	C4722518	MIR34C	407042		microRNA 34c		131	0.541	0.885		0.02		1	2	1	2017	2017
Triple-Negative Breast Carcinoma	C4722518	MIR361	494323		microRNA 361		79	0.578	0.654		0.01		1	1	0	2019	2019
Triple-Negative Breast Carcinoma	C4722518	MIR373	442918		microRNA 373		97	0.556	0.692		0.01		1	1	0	2018	2018
Triple-Negative Breast Carcinoma	C4722518	MIR374A	442919		microRNA 374a		57	0.617	0.615		0.01		1	1	0	2019	2019
Triple-Negative Breast Carcinoma	C4722518	MIR374B	100126317		microRNA 374b		53	0.621	0.5		0.01		1	1	0	2015	2015
Triple-Negative Breast Carcinoma	C4722518	MIR375	494324		microRNA 375		226	0.476	0.769		0.01		1	1	0	2019	2019
Triple-Negative Breast Carcinoma	C4722518	MIR377	494326		microRNA 377		74	0.587	0.731		0.01		1	1	0	2019	2019
Triple-Negative Breast Carcinoma	C4722518	MIR383	494332		microRNA 383		65	0.608	0.731		0.01		1	1	0	2019	2019
Triple-Negative Breast Carcinoma	C4722518	MIR384	494333		microRNA 384		55	0.612	0.731		0.01		1	1	0	2018	2018
Triple-Negative Breast Carcinoma	C4722518	MIR425	494337		microRNA 425		78	0.581	0.654		0.01		1	1	0	2017	2017
Triple-Negative Breast Carcinoma	C4722518	MIR4306	100422861		microRNA 4306		12	0.769	0.269		0.01		1	1	0	2019	2019
Triple-Negative Breast Carcinoma	C4722518	MIR4319	100422829		microRNA 4319		19	0.743	0.269		0.02		1	2	0	2018	2019
Triple-Negative Breast Carcinoma	C4722518	MIR4435-2HG	541471		MIR4435-2 host gene		86	0.604	0.692		0.02		1	2	0	2018	2019
Triple-Negative Breast Carcinoma	C4722518	MIR4458	100616142		microRNA 4458		13	0.76	0.154		0.02		1	2	0	2019	2019
Triple-Negative Breast Carcinoma	C4722518	MIR4516	100616258		microRNA 4516		26	0.695	0.385		0.01		1	1	0	2020	2020
Triple-Negative Breast Carcinoma	C4722518	MIR451A	574411		microRNA 451a		177	0.505	0.769		0.01		1	1	0	2014	2014
Triple-Negative Breast Carcinoma	C4722518	MIR454	768216		microRNA 454		55	0.617	0.538		0.02		1	2	0	2016	2019
Triple-Negative Breast Carcinoma	C4722518	MIR455	619556		microRNA 455		92	0.559	0.769		0.02		1	2	0	2017	2019
Triple-Negative Breast Carcinoma	C4722518	MIR4708	100616176		microRNA 4708		2	0.931	0.077		0.01		1	1	0	2020	2020
Triple-Negative Breast Carcinoma	C4722518	MIR4753	100616224		microRNA 4753		2	0.931	0.077		0.01		1	1	0	2018	2018
Triple-Negative Breast Carcinoma	C4722518	MIR4756	100616225		microRNA 4756		5	0.861	0.231		0.01		1	1	0	2019	2019
Triple-Negative Breast Carcinoma	C4722518	MIR483	619552		microRNA 483		122	0.537	0.769		0.01		1	1	0	2020	2020
Triple-Negative Breast Carcinoma	C4722518	MIR490	574443		microRNA 490		68	0.588	0.538		0.01		1	1	0	2016	2016
Triple-Negative Breast Carcinoma	C4722518	MIR493	574450		microRNA 493		52	0.626	0.538		0.01		1	1	0	2018	2018
Triple-Negative Breast Carcinoma	C4722518	MIR497	574456		microRNA 497		116	0.539	0.808		0.02		1	2	0	2016	2018
Triple-Negative Breast Carcinoma	C4722518	MIR498	574460		microRNA 498		49	0.633	0.5		0.02		1	2	0	2016	2018
Triple-Negative Breast Carcinoma	C4722518	MIR503HG	84848		MIR503 host gene		21	0.743	0.308		0.01		1	1	0	2019	2019
Triple-Negative Breast Carcinoma	C4722518	MIR508	574513		microRNA 508		26	0.705	0.385		0.01		1	1	0	2018	2018
Triple-Negative Breast Carcinoma	C4722518	MIR5195	100847062		microRNA 5195		15	0.78	0.192		0.01		1	1	0	2019	2019
Triple-Negative Breast Carcinoma	C4722518	MIR532	693124		microRNA 532		52	0.628	0.615		0.01		1	1	0	2018	2018
Triple-Negative Breast Carcinoma	C4722518	MIR539	664612		microRNA 539		62	0.61	0.654		0.01		1	1	0	2018	2018
Triple-Negative Breast Carcinoma	C4722518	MIR542	664617		microRNA 542		76	0.592	0.538		0.01		1	1	0	2016	2016
Triple-Negative Breast Carcinoma	C4722518	MIR544A	664613		microRNA 544a		28	0.695	0.423		0.01		1	1	0	2016	2016
Triple-Negative Breast Carcinoma	C4722518	MIR5590	100847069		microRNA 5590		10	0.839	0.115		0.01		1	1	0	2019	2019
Triple-Negative Breast Carcinoma	C4722518	MIR5702	100847053		microRNA 5702		7	0.861	0.154		0.01		1	1	0	2019	2019
Triple-Negative Breast Carcinoma	C4722518	MIR574	693159		microRNA 574		71	0.599	0.577		0.01		1	1	0	2018	2018
Triple-Negative Breast Carcinoma	C4722518	MIR589	693174		microRNA 589		41	0.656	0.538		0.01		1	1	0	2019	2019
Triple-Negative Breast Carcinoma	C4722518	MIR590	693175		microRNA 590		99	0.553	0.692		0.01		1	1	0	2019	2019
Triple-Negative Breast Carcinoma	C4722518	MIR603	693188		microRNA 603		29	0.695	0.308		0.01		1	1	0	2017	2017
Triple-Negative Breast Carcinoma	C4722518	MIR613	693198		microRNA 613		60	0.608	0.615		0.02		1	2	0	2018	2018
Triple-Negative Breast Carcinoma	C4722518	MIR620	693205		microRNA 620		10	0.805	0.154		0.01		1	1	0	2019	2019
Triple-Negative Breast Carcinoma	C4722518	MIR629	693214		microRNA 629		40	0.653	0.538		0.01		1	1	0	2017	2017
Triple-Negative Breast Carcinoma	C4722518	MIR638	693223		microRNA 638		48	0.636	0.462		0.02		1	2	0	2014	2016
Triple-Negative Breast Carcinoma	C4722518	MIR645	693230		microRNA 645		21	0.729	0.346		0.01		1	1	0	2018	2018
Triple-Negative Breast Carcinoma	C4722518	MIR655	724025		microRNA 655		36	0.678	0.385		0.01		1	1	0	2016	2016
Triple-Negative Breast Carcinoma	C4722518	MIR661	724031		microRNA 661		28	0.695	0.385		0.01		1	1	0	2018	2018
Triple-Negative Breast Carcinoma	C4722518	MIR664B	100847052		microRNA 664b		4	0.931	0.077		0.01		1	1	0	2017	2017
Triple-Negative Breast Carcinoma	C4722518	MIR6809	102465485		microRNA 6809		4	0.89	0.115		0.01		1	1	0	2018	2018
Triple-Negative Breast Carcinoma	C4722518	MIR6838	102465504		microRNA 6838		3	0.931	0.077		0.01		1	1	0	2019	2019
Triple-Negative Breast Carcinoma	C4722518	MIR708	100126333		microRNA 708		86	0.57	0.692		0.01		1	1	0	2019	2019
Triple-Negative Breast Carcinoma	C4722518	MIR761	100313892		microRNA 761		34	0.682	0.308		0.01		1	1	0	2017	2017
Triple-Negative Breast Carcinoma	C4722518	MIR770	768222		microRNA 770		27	0.705	0.462		0.01		1	1	0	2018	2018
Triple-Negative Breast Carcinoma	C4722518	MIR873	100126316		microRNA 873		67	0.601	0.538		0.02		1	2	0	2019	2019
Triple-Negative Breast Carcinoma	C4722518	MIR890	100126303		microRNA 890		4	0.931	0.077		0.01		1	1	0	2019	2019
Triple-Negative Breast Carcinoma	C4722518	MIR92B	693235		microRNA 92b		80	0.59	0.654		0.01		0	1	0	2019	2019
Triple-Negative Breast Carcinoma	C4722518	MIR93	407050		microRNA 93		171	0.507	0.808		0.04		1	4	0	2015	2017
Triple-Negative Breast Carcinoma	C4722518	MIR940	100126328		microRNA 940		60	0.604	0.577		0.02		1	2	0	2016	2018
Triple-Negative Breast Carcinoma	C4722518	MIR96	407053		microRNA 96		134	0.536	0.769		0.02		1	2	0	2018	2020
Triple-Negative Breast Carcinoma	C4722518	MIRLET7B	406884		microRNA let-7b		186	0.493	0.769		0.01		1	1	0	2011	2011
Triple-Negative Breast Carcinoma	C4722518	MIRLET7D	406886		microRNA let-7d		82	0.579	0.692		0.01		1	1	0	2016	2016
Triple-Negative Breast Carcinoma	C4722518	MIRLET7I	406891		microRNA let-7i		86	0.575	0.615		0.01		1	1	0	2011	2011
Triple-Negative Breast Carcinoma	C4722518	MKI67	4288	P46013	marker of proliferation Ki-67		351	0.431	0.808	1.2598e-28	0.02		1	2	0	2012	2018
Triple-Negative Breast Carcinoma	C4722518	MKNK1	8569	Q9BUB5	MAPK interacting serine/threonine kinase 1	Kinase	73	0.606	0.808	8.0483e-10	0.02		1	2	0	2018	2019
Triple-Negative Breast Carcinoma	C4722518	MLRL	8201		Myeloid leukemia-related gene (myeloid tumor suppressor)		95	0.564	0.769		0.01		1	1	0	2017	2017
Triple-Negative Breast Carcinoma	C4722518	MMAB	326625	Q96EY8	metabolism of cobalamin associated B	Enzyme	46	0.695	0.538	0.0041291	0.01		1	1	0	2017	2017
Triple-Negative Breast Carcinoma	C4722518	MMP1	4312	P03956	matrix metallopeptidase 1	Enzyme	589	0.385	0.885	7.7197e-18	0.01		1	1	0	2017	2017
Triple-Negative Breast Carcinoma	C4722518	MMP11	4320	P24347	matrix metallopeptidase 11	Enzyme	130	0.542	0.692	2.4125e-05	0.01		1	1	0	2016	2016
Triple-Negative Breast Carcinoma	C4722518	MMP12	4321	P39900	matrix metallopeptidase 12	Enzyme	216	0.484	0.885		0.01		1	1	0	2016	2016
Triple-Negative Breast Carcinoma	C4722518	MMP14	4323	P50281	matrix metallopeptidase 14	Enzyme	340	0.447	0.769	0.99522	0.04		1	4	0	2017	2019
Triple-Negative Breast Carcinoma	C4722518	MMP17	4326	Q9ULZ9	matrix metallopeptidase 17	Enzyme	30	0.705	0.308	2.1964e-08	0.01		1	1	0	2019	2019
Triple-Negative Breast Carcinoma	C4722518	MMP2	4313	P08253	matrix metallopeptidase 2	Enzyme	1021	0.333	0.923	0.83878	0.01		1	1	0	2018	2018
Triple-Negative Breast Carcinoma	C4722518	MMP7	4316	P09237	matrix metallopeptidase 7	Enzyme	320	0.446	0.885	1.0404e-09	0.02		1	2	0	2013	2018
Triple-Negative Breast Carcinoma	C4722518	MMP9	4318	P14780	matrix metallopeptidase 9	Enzyme	1337	0.305	0.923	1.8869e-17	0.09		1	9	0	2014	2019
Triple-Negative Breast Carcinoma	C4722518	MOK	5891	Q9UQ07	MOK protein kinase	Kinase	251	0.476	0.769	8.8397e-22	0.02		1	2	0	2018	2019
Triple-Negative Breast Carcinoma	C4722518	MORC2	22880	Q9Y6X9	MORC family CW-type zinc finger 2		83	0.626	0.462	0.99999	0.01		1	1	1	2018	2018
Triple-Negative Breast Carcinoma	C4722518	MPEG1	219972	Q2M385	macrophage expressed 1		98	0.575	0.731	3.5925e-16	0.03		1	3	0	2015	2019
Triple-Negative Breast Carcinoma	C4722518	MRE11	4361	P49959	MRE11 homolog, double strand break repair nuclease		171	0.527	0.808	1.264e-12	0.01		1	1	0	2016	2016
Triple-Negative Breast Carcinoma	C4722518	MRGPRX1	259249	Q96LB2	MAS related GPR family member X1	G-protein coupled receptor	166	0.531	0.923		0.01		1	1	0	2014	2014
Triple-Negative Breast Carcinoma	C4722518	MRGPRX3	117195	Q96LB0	MAS related GPR family member X3	G-protein coupled receptor	167	0.529	0.923		0.01		1	1	0	2014	2014
Triple-Negative Breast Carcinoma	C4722518	MRGPRX4	117196	Q96LA9	MAS related GPR family member X4	G-protein coupled receptor	166	0.531	0.923		0.01		1	1	0	2014	2014
Triple-Negative Breast Carcinoma	C4722518	MS4A1	931	P11836	membrane spanning 4-domains A1	Receptor	451	0.411	0.846	5.0781e-05	0.01		1	1	0	2013	2013
Triple-Negative Breast Carcinoma	C4722518	MSC	9242	O60682	musculin		241	0.475	0.846	0.024651	0.01		1	1	0	2017	2017
Triple-Negative Breast Carcinoma	C4722518	MSH2	4436	P43246	mutS homolog 2	Nucleic acid binding	490	0.406	0.808	0.89539	0.02		1	2	2	2015	2020
Triple-Negative Breast Carcinoma	C4722518	MSH3	4437	P20585	mutS homolog 3	Nucleic acid binding	245	0.474	0.769	7.4413e-31	0.01		1	1	1	2014	2014
Triple-Negative Breast Carcinoma	C4722518	MSH6	2956	P52701	mutS homolog 6	Nucleic acid binding	296	0.462	0.731	3.6705e-05	0.03		1	3	5	2014	2019
Triple-Negative Breast Carcinoma	C4722518	MSI1	4440	O43347	musashi RNA binding protein 1		116	0.55	0.615	0.99357	0.01		1	1	0	2012	2012
Triple-Negative Breast Carcinoma	C4722518	MSLN	10232	Q13421	mesothelin	Extracellular structure	146	0.525	0.692	5.8751e-25	0.06		1	6	0	2012	2019
Triple-Negative Breast Carcinoma	C4722518	MST1R	4486	Q04912	macrophage stimulating 1 receptor	Kinase	133	0.542	0.808	7.8684e-37	0.01		1	1	0	2018	2018
Triple-Negative Breast Carcinoma	C4722518	MTA1	9112	Q13330	metastasis associated 1	Nucleic acid binding	118	0.547	0.692	1	0.01		1	1	0	2018	2018
Triple-Negative Breast Carcinoma	C4722518	MTA2	9219	O94776	metastasis associated 1 family member 2	Nucleic acid binding	93	0.579	0.808	0.74479	0.01		1	1	0	2019	2019
Triple-Negative Breast Carcinoma	C4722518	MTBP	27085	Q96DY7	MDM2 binding protein		25	0.729	0.269	3.5074e-19	0.01		1	1	0	2014	2014
Triple-Negative Breast Carcinoma	C4722518	MTDH	92140	Q86UE4	metadherin		200	0.491	0.769	0.32924	0.06		1	6	0	2011	2020
Triple-Negative Breast Carcinoma	C4722518	MTG1	92170	Q9BT17	mitochondrial ribosome associated GTPase 1		59	0.621	0.769	0.013299	0.02		1	2	0	2019	2019
Triple-Negative Breast Carcinoma	C4722518	MTHFR	4524	P42898	methylenetetrahydrofolate reductase		985	0.337	0.885	3.2068e-10	0.01		1	1	1	2015	2015
Triple-Negative Breast Carcinoma	C4722518	MTMR3	8897	Q13615	myotubularin related protein 3	Enzyme	41	0.682	0.462	0.99937	0.01		1	1	0	2019	2019
Triple-Negative Breast Carcinoma	C4722518	MTOR	2475	P42345	mechanistic target of rapamycin kinase	Kinase	960	0.343	0.885	1	0.1		0.917	12	0	2014	2019
Triple-Negative Breast Carcinoma	C4722518	MTTP	4547	P55157	microsomal triglyceride transfer protein	Transporter	209	0.505	0.846	1.04e-05	0.01		1	1	0	2015	2015
Triple-Negative Breast Carcinoma	C4722518	MUC1	4582	P15941	mucin 1, cell surface associated		594	0.384	0.885	0.018774	0.1		1	16	0	2016	2019
Triple-Negative Breast Carcinoma	C4722518	MUC16	94025	Q8WXI7	mucin 16, cell surface associated		236	0.479	0.808	8.2703e-112	0.01		1	1	0	2014	2014
Triple-Negative Breast Carcinoma	C4722518	MUC4	4585	Q99102	mucin 4, cell surface associated		183	0.506	0.769	2.7904e-54	0.01		1	1	0	2019	2019
Triple-Negative Breast Carcinoma	C4722518	MUL1	79594	Q969V5	mitochondrial E3 ubiquitin protein ligase 1		241	0.473	0.808	1.9108e-06	0.03		1	3	1	2018	2020
Triple-Negative Breast Carcinoma	C4722518	MVP	9961	Q14764	major vault protein	Nucleic acid binding	172	0.512	0.769	6.7564e-08	0.01		1	1	0	2019	2019
Triple-Negative Breast Carcinoma	C4722518	MYB	4602	P10242	MYB proto-oncogene, transcription factor		206	0.49	0.692	0.81924	0.02		1	2	0	2015	2018
Triple-Negative Breast Carcinoma	C4722518	MYC	4609	P01106	MYC proto-oncogene, bHLH transcription factor	Transcription factor	821	0.344	0.923	0.99801	0.1		1	19	0	2012	2019
Triple-Negative Breast Carcinoma	C4722518	MYCBP	26292	Q99417	MYC binding protein	Transcription factor	39	0.663	0.5	0.84451	0.01		1	1	0	2019	2019
Triple-Negative Breast Carcinoma	C4722518	MYLK	4638	Q15746	myosin light chain kinase	Kinase	199	0.51	0.846	9.1706e-12	0.01		1	1	0	2016	2016
Triple-Negative Breast Carcinoma	C4722518	MYOF	26509	Q9NZM1	myoferlin	Transporter	34	0.691	0.538	1.475e-54	0.01		1	1	0	2017	2017
Triple-Negative Breast Carcinoma	C4722518	MZF1	7593	P28698	myeloid zinc finger 1		62	0.617	0.577	1.0667e-10	0.03		1	3	0	2016	2019
Triple-Negative Breast Carcinoma	C4722518	NAMPT	10135	P43490	nicotinamide phosphoribosyltransferase	Signaling	199	0.502	0.808	0.97914	0.01		1	1	0	2019	2019
Triple-Negative Breast Carcinoma	C4722518	NANOG	79923	Q9H9S0	Nanog homeobox	Transcription factor	140	0.531	0.654	0.72022	0.04		1	4	0	2015	2018
Triple-Negative Breast Carcinoma	C4722518	NAPSA	9476	O96009	napsin A aspartic peptidase	Enzyme	89	0.576	0.654	7.1709e-14	0.01		1	1	0	2019	2019
Triple-Negative Breast Carcinoma	C4722518	NCAPD2	9918	Q15021	non-SMC condensin I complex subunit D2	Nucleic acid binding	19	0.76	0.346	1.0776e-12	0.01		1	1	0	2020	2020
Triple-Negative Breast Carcinoma	C4722518	NCAPG	64151	Q9BPX3	non-SMC condensin I complex subunit G		19	0.743	0.269	4.0848e-07	0.01		1	1	0	2019	2019
Triple-Negative Breast Carcinoma	C4722518	NCL	4691	P19338	nucleolin	Nucleic acid binding	167	0.509	0.808	0.99992	0.02		1	2	0	2015	2018
Triple-Negative Breast Carcinoma	C4722518	NCOA3	8202	Q9Y6Q9	nuclear receptor coactivator 3	Kinase	142	0.522	0.654	0.54065	0.01		1	1	0	2019	2019
Triple-Negative Breast Carcinoma	C4722518	NCR3LG1	374383	Q68D85	natural killer cell cytotoxicity receptor 3 ligand 1		37	0.705	0.308	8.8569e-05	0.01		1	1	0	2018	2018
Triple-Negative Breast Carcinoma	C4722518	NDUFS4	4724	O43181	NADH:ubiquinone oxidoreductase subunit S4		137	0.587	0.808	0.00031196	0.01		1	1	0	2015	2015
Triple-Negative Breast Carcinoma	C4722518	NDUFS7	374291	O75251	NADH:ubiquinone oxidoreductase core subunit S7		120	0.579	0.769	0.9142	0.01		1	1	0	2015	2015
Triple-Negative Breast Carcinoma	C4722518	NEAT1	283131		nuclear paraspeckle assembly transcript 1		179	0.502	0.769		0.01		1	1	0	2019	2019
Triple-Negative Breast Carcinoma	C4722518	NECTIN4	81607	Q96NY8	nectin cell adhesion molecule 4		77	0.599	0.538	0.8353	0.02		1	2	0	2017	2019
Triple-Negative Breast Carcinoma	C4722518	NEDD4	4734	P46934	NEDD4 E3 ubiquitin protein ligase	Enzyme	101	0.569	0.846	8.7208e-13	0.01		1	1	0	2019	2019
Triple-Negative Breast Carcinoma	C4722518	NEDD4L	23327	Q96PU5	NEDD4 like E3 ubiquitin protein ligase	Enzyme	108	0.573	0.731	1	0.01		1	1	0	2018	2018
Triple-Negative Breast Carcinoma	C4722518	NEDD9	4739	Q14511	neural precursor cell expressed, developmentally down-regulated 9		113	0.548	0.769	0.12634	0.02		1	2	0	2011	2017
Triple-Negative Breast Carcinoma	C4722518	NEK2	4751	P51955	NIMA related kinase 2	Kinase	103	0.572	0.692	1.1514e-06	0.02		1	2	0	2013	2014
Triple-Negative Breast Carcinoma	C4722518	NES	10763	P48681	nestin		302	0.45	0.808	1.6236e-06	0.04		1	4	0	2012	2018
Triple-Negative Breast Carcinoma	C4722518	NEU1	4758	Q99519	neuraminidase 1	Enzyme	207	0.513	0.769	7.3441e-05	0.04		0.75	4	0	2010	2018
Triple-Negative Breast Carcinoma	C4722518	NEURL1	9148	O76050	neuralized E3 ubiquitin protein ligase 1	Enzyme	103	0.556	0.538	0.011091	0.04		0.75	4	0	2010	2018
Triple-Negative Breast Carcinoma	C4722518	NFE2L2	4780	Q16236	nuclear factor, erythroid 2 like 2	Enzyme	823	0.357	0.885	0.0035719	0.02		1	2	0	2015	2020
Triple-Negative Breast Carcinoma	C4722518	NFIB	4781	O00712	nuclear factor I B	Nucleic acid binding	102	0.573	0.654	0.99861	0.04		1	4	0	2008	2018
Triple-Negative Breast Carcinoma	C4722518	NFKB1	4790	P19838	nuclear factor kappa B subunit 1	Transcription factor	551	0.396	0.923	1	0.01		1	1	0	2018	2018
Triple-Negative Breast Carcinoma	C4722518	NFKB2	4791	Q00653	nuclear factor kappa B subunit 2	Transcription factor	194	0.509	0.808	1	0.01		1	1	0	2018	2018
Triple-Negative Breast Carcinoma	C4722518	NGF	4803	P01138	nerve growth factor	Signaling	616	0.391	0.885	0.82026	0.01		1	1	0	2019	2019
Triple-Negative Breast Carcinoma	C4722518	NGFR	4804	P08138	nerve growth factor receptor	Receptor	256	0.477	0.846	0.097889	0.01		1	1	0	2019	2019
Triple-Negative Breast Carcinoma	C4722518	NISCH	11188	Q9Y2I1	nischarin	Enzyme modulator	49	0.656	0.577	0.99443	0.01		1	1	0	2017	2017
Triple-Negative Breast Carcinoma	C4722518	NKX2-1	7080	P43699	NK2 homeobox 1	Transcription factor	319	0.457	0.808	0.35874	0.01		1	1	0	2019	2019
Triple-Negative Breast Carcinoma	C4722518	NLRP3	114548	Q96P20	NLR family pyrin domain containing 3		805	0.361	0.962	0.00081103	0.01		1	1	0	2019	2019
Triple-Negative Breast Carcinoma	C4722518	NLRX1	79671	Q86UT6	NLR family member X1	Enzyme	51	0.641	0.654	7.7345e-31	0.01		1	1	0	2019	2019
Triple-Negative Breast Carcinoma	C4722518	NM	4827		neutrophil migration		250	0.473	0.808		0.02		1	2	0	2019	2019
Triple-Negative Breast Carcinoma	C4722518	NOC2L	26155	Q9Y3T9	NOC2 like nucleolar associated transcriptional repressor		80	0.593	0.731	2.8933e-29	0.02		1	2	0	2017	2020
Triple-Negative Breast Carcinoma	C4722518	NOD1	10392	Q9Y239	nucleotide binding oligomerization domain containing 1	Enzyme	136	0.541	0.769	2.4602e-18	0.02		1	2	0	2019	2019
Triple-Negative Breast Carcinoma	C4722518	NOL3	8996	O60936	nucleolar protein 3		100	0.575	0.808	0.0001992	0.01		1	1	0	2018	2018
Triple-Negative Breast Carcinoma	C4722518	NONO	4841	Q15233	non-POU domain containing octamer binding	Nucleic acid binding	142	0.554	0.731	0.9935	0.01		1	1	0	2019	2019
Triple-Negative Breast Carcinoma	C4722518	NOS1	4842	P29475	nitric oxide synthase 1		521	0.408	0.885	1	0.03		1	3	0	2014	2019
Triple-Negative Breast Carcinoma	C4722518	NOS2	4843	P35228	nitric oxide synthase 2		783	0.364	0.923	4.0277e-15	0.06		1	6	0	2014	2019
Triple-Negative Breast Carcinoma	C4722518	NOS3	4846	P29474	nitric oxide synthase 3		706	0.378	0.885	6.7246e-07	0.01		1	1	0	2018	2018
Triple-Negative Breast Carcinoma	C4722518	NOTCH1	4851	P46531	notch receptor 1		693	0.369	0.885	1	0.1		1	11	0	2013	2019
Triple-Negative Breast Carcinoma	C4722518	NOTCH2	4853	Q04721	notch receptor 2		384	0.441	0.808	1	0.02		1	2	0	2016	2017
Triple-Negative Breast Carcinoma	C4722518	NOTCH3	4854	Q9UM47	notch receptor 3		418	0.435	0.808	0.40757	0.04		0.75	4	0	2017	2020
Triple-Negative Breast Carcinoma	C4722518	NOTCH4	4855	Q99466	notch receptor 4		150	0.534	0.731	2.0544e-23	0.04		1	4	0	2014	2019
Triple-Negative Breast Carcinoma	C4722518	NPM1	4869	P06748	nucleophosmin 1	Chaperone	283	0.464	0.846	0.99816	0.02		1	2	0	2019	2019
Triple-Negative Breast Carcinoma	C4722518	NQO1	1728	P15559	NAD(P)H quinone dehydrogenase 1		368	0.434	0.885	1.1867e-09	0.02		1	2	0	2014	2018
Triple-Negative Breast Carcinoma	C4722518	NR0B2	8431	Q15466	nuclear receptor subfamily 0 group B member 2	Nuclear receptor	251	0.474	0.808	8.3377e-06	0.03		1	3	0	2016	2017
Triple-Negative Breast Carcinoma	C4722518	NR1D1	9572	P20393	nuclear receptor subfamily 1 group D member 1	Nuclear receptor	60	0.608	0.692	0.81796	0.01		1	1	0	2019	2019
Triple-Negative Breast Carcinoma	C4722518	NR1I2	8856	O75469	nuclear receptor subfamily 1 group I member 2	Nuclear receptor	462	0.418	0.846	7.2668e-09	0.02		1	2	0	2018	2019
Triple-Negative Breast Carcinoma	C4722518	NR1I3	9970	Q14994	nuclear receptor subfamily 1 group I member 3	Nuclear receptor	318	0.448	0.846	3.5259e-08	0.03		1	3	0	2018	2019
Triple-Negative Breast Carcinoma	C4722518	NR2C2	7182	P49116	nuclear receptor subfamily 2 group C member 2	Nuclear receptor	131	0.534	0.808	0.99892	0.01		1	1	0	2018	2018
Triple-Negative Breast Carcinoma	C4722518	NR3C1	2908	P04150	nuclear receptor subfamily 3 group C member 1	Nuclear receptor	590	0.393	0.885	0.96958	0.08		1	8	0	2015	2019
Triple-Negative Breast Carcinoma	C4722518	NR3C2	4306	P08235	nuclear receptor subfamily 3 group C member 2	Nuclear receptor	287	0.469	0.846	0.83739	0.01		1	1	0	2019	2019
Triple-Negative Breast Carcinoma	C4722518	NR4A1	3164	P22736	nuclear receptor subfamily 4 group A member 1	Nuclear receptor	216	0.49	0.731	0.37074	0.02		1	2	0	2017	2017
Triple-Negative Breast Carcinoma	C4722518	NR5A1	2516	Q13285	nuclear receptor subfamily 5 group A member 1	Nuclear receptor	255	0.479	0.731	0.9896	0.01		1	1	0	2017	2017
Triple-Negative Breast Carcinoma	C4722518	NRAD1	121838		non-coding RNA in the aldehyde dehydrogenase 1A pathway		9	0.792	0.192		0.01		1	1	0	2020	2020
Triple-Negative Breast Carcinoma	C4722518	NRF1	4899	Q16656	nuclear respiratory factor 1		74	0.603	0.808	0.99922	0.01		1	1	0	2017	2017
Triple-Negative Breast Carcinoma	C4722518	NRIP1	8204	P48552	nuclear receptor interacting protein 1		88	0.592	0.654	0.99394	0.01		1	1	0	2018	2018
Triple-Negative Breast Carcinoma	C4722518	NRON	641373		non-coding repressor of NFAT		11	0.805	0.269		0.01		1	1	0	2019	2019
Triple-Negative Breast Carcinoma	C4722518	NRP1	8829	O14786	neuropilin 1		246	0.476	0.808	0.98584	0.02		1	2	0	2017	2020
Triple-Negative Breast Carcinoma	C4722518	NRP2	8828	O60462	neuropilin 2		144	0.539	0.615	0.00080686	0.01		1	1	0	2019	2019
Triple-Negative Breast Carcinoma	C4722518	NSD2	7468	O96028	nuclear receptor binding SET domain protein 2	Epigenetic regulator	224	0.507	0.769	1	0.01		1	1	0	2019	2019
Triple-Negative Breast Carcinoma	C4722518	NT5E	4907	P21589	5'-nucleotidase ecto	Enzyme	376	0.436	0.885	2.2881e-11	0.03		1	3	0	2013	2019
Triple-Negative Breast Carcinoma	C4722518	NTF3	4908	P20783	neurotrophin 3	Signaling	170	0.519	0.808	0.93201	0.01		1	1	0	2012	2012
Triple-Negative Breast Carcinoma	C4722518	NTRK1	4914	P04629	neurotrophic receptor tyrosine kinase 1	Kinase	443	0.422	0.808	1.9568e-06	0.01		1	1	0	2016	2016
Triple-Negative Breast Carcinoma	C4722518	NTS	4922	P30990	neurotensin		184	0.517	0.769	3.8527e-05	0.02		1	2	0	2014	2018
Triple-Negative Breast Carcinoma	C4722518	NTSR1	4923	P30989	neurotensin receptor 1	G-protein coupled receptor	124	0.563	0.692	1.928e-08	0.01		1	1	0	2018	2018
Triple-Negative Breast Carcinoma	C4722518	NUDT18	79873	Q6ZVK8	nudix hydrolase 18		5	0.861	0.115	1.8736e-06	0.01		1	1	0	2018	2018
Triple-Negative Breast Carcinoma	C4722518	NUP62	23636	P37198	nucleoporin 62	Transporter	273	0.47	0.885	0.95006	0.01		1	1	0	2012	2012
Triple-Negative Breast Carcinoma	C4722518	NUP98	4928	P52948	nucleoporin 98 and 96 precursor	Enzyme	129	0.532	0.577	1	0.01		1	1	0	2019	2019
Triple-Negative Breast Carcinoma	C4722518	NUSAP1	51203	Q9BXS6	nucleolar and spindle associated protein 1		55	0.623	0.346	0.045674	0.02		1	2	0	2015	2018
Triple-Negative Breast Carcinoma	C4722518	OBP2A	29991	Q9NY56	odorant binding protein 2A	Enzyme	71	0.61	0.462	1.5163e-06	0.03		1	3	0	2016	2018
Triple-Negative Breast Carcinoma	C4722518	OC90	729330	Q02509	otoconin 90		8	0.839	0.308	5.6811e-12	0.01		1	1	0	2019	2019
Triple-Negative Breast Carcinoma	C4722518	OGG1	4968	O15527	8-oxoguanine DNA glycosylase		313	0.453	0.808	3.9314e-12	0.02		1	2	2	2013	2014
Triple-Negative Breast Carcinoma	C4722518	OLFM4	10562	Q6UX06	olfactomedin 4	Cellular structure	89	0.576	0.615	2.7754e-06	0.02		1	2	0	2017	2019
Triple-Negative Breast Carcinoma	C4722518	OPN1LW	5956	P04000	opsin 1, long wave sensitive	G-protein coupled receptor	197	0.497	0.808	0.97535	0.01		1	1	0	2019	2019
Triple-Negative Breast Carcinoma	C4722518	ORAI1	84876	Q96D31	ORAI calcium release-activated calcium modulator 1	Ion channel	195	0.52	0.808	1.9068e-05	0.01		1	1	0	2019	2019
Triple-Negative Breast Carcinoma	C4722518	OSM	5008	P13725	oncostatin M	Signaling	188	0.505	0.769	0.58916	0.02		1	2	0	2017	2019
Triple-Negative Breast Carcinoma	C4722518	OSTN-AS1	106480738		OSTN antisense RNA 1		2	0.931	0.077		0.01		1	1	0	2019	2019
Triple-Negative Breast Carcinoma	C4722518	OXER1	165140	Q8TDS5	oxoeicosanoid receptor 1	G-protein coupled receptor	169	0.529	0.923	7.3192e-08	0.01		1	1	0	2014	2014
Triple-Negative Breast Carcinoma	C4722518	P4HA1	5033	P13674	prolyl 4-hydroxylase subunit alpha 1		27	0.736	0.385	0.93166	0.01		1	1	0	2018	2018
Triple-Negative Breast Carcinoma	C4722518	PADI1	29943	Q9ULC6	peptidyl arginine deiminase 1		54	0.644	0.692	2.0388e-15	0.01		1	1	0	2017	2017
Triple-Negative Breast Carcinoma	C4722518	PADI4	23569	Q9UM07	peptidyl arginine deiminase 4		196	0.494	0.808	4.6001e-16	0.01		1	1	0	2015	2015
Triple-Negative Breast Carcinoma	C4722518	PAEP	5047	P09466	progestagen associated endometrial protein	Enzyme	397	0.43	0.846	3.1109e-08	0.03		1	3	0	2014	2017
Triple-Negative Breast Carcinoma	C4722518	PAG1	55824	Q9NWQ8	phosphoprotein membrane anchor with glycosphingolipid microdomains 1		174	0.505	0.808	0.017764	0.01		1	1	0	2019	2019
Triple-Negative Breast Carcinoma	C4722518	PAK4	10298	O96013	p21 (RAC1) activated kinase 4	Kinase	81	0.584	0.731	4.3602e-05	0.01		1	1	0	2017	2017
Triple-Negative Breast Carcinoma	C4722518	PALB2	79728	Q86YC2	partner and localizer of BRCA2		260	0.485	0.769	3.0379e-19	0.03		1	3	0	2014	2020
Triple-Negative Breast Carcinoma	C4722518	PARD3	56288	Q8TEW0	par-3 family cell polarity regulator		68	0.608	0.615	0.95577	0.01		1	1	0	2018	2018
Triple-Negative Breast Carcinoma	C4722518	PARP1	142	P09874	poly(ADP-ribose) polymerase 1		565	0.389	0.923	0.00033366	0.1		1	42	2	2010	2019
Triple-Negative Breast Carcinoma	C4722518	PARVA	55742	Q9NVD7	parvin alpha	Cellular structure	20	0.769	0.154	0.40854	0.01		1	1	0	2019	2019
Triple-Negative Breast Carcinoma	C4722518	PAX5	5079	Q02548	paired box 5		199	0.487	0.654	0.99798	0.01		1	1	0	2015	2015
Triple-Negative Breast Carcinoma	C4722518	PCBP4	57060	P57723	poly(rC) binding protein 4	Enzyme	147	0.523	0.808	0.0023713	0.01		1	1	0	2019	2019
Triple-Negative Breast Carcinoma	C4722518	PCDHGB7	56099	Q9Y5F8	protocadherin gamma subfamily B, 7		5	0.839	0.154	1.5509e-05	0.01		1	1	0	2019	2019
Triple-Negative Breast Carcinoma	C4722518	PCGF2	7703	P35227	polycomb group ring finger 2		114	0.579	0.615	0.86397	0.01		1	1	0	2015	2015
Triple-Negative Breast Carcinoma	C4722518	PCNA	5111	P12004	proliferating cell nuclear antigen	Nucleic acid binding	581	0.382	0.846	0.97606	0.01		1	1	0	2018	2018
Triple-Negative Breast Carcinoma	C4722518	PCSK5	5125	Q92824	proprotein convertase subtilisin/kexin type 5	Enzyme	57	0.659	0.538	2.5352e-12	0.01		1	1	0	2017	2017
Triple-Negative Breast Carcinoma	C4722518	PDCD1	5133	Q15116	programmed cell death 1		497	0.402	0.846	0.41706	0.1		1	12	0	2017	2020
Triple-Negative Breast Carcinoma	C4722518	PDCD1LG2	80380	Q9BQ51	programmed cell death 1 ligand 2		191	0.496	0.769	1.203e-05	0.01		1	1	0	2015	2015
Triple-Negative Breast Carcinoma	C4722518	PDCD4	27250	Q53EL6	programmed cell death 4	Nucleic acid binding	198	0.494	0.769	3.3572e-07	0.02		1	2	0	2015	2016
Triple-Negative Breast Carcinoma	C4722518	PDE7B	27115	Q9NP56	phosphodiesterase 7B		34	0.691	0.423	0.54578	0.01		1	1	0	2019	2019
Triple-Negative Breast Carcinoma	C4722518	PDGFRA	5156	P16234	platelet derived growth factor receptor alpha	Kinase	452	0.415	0.808	1	0.02		1	2	0	2014	2014
Triple-Negative Breast Carcinoma	C4722518	PDGFRB	5159	P09619	platelet derived growth factor receptor beta	Kinase	492	0.416	0.846	0.9041	0.08		1	8	0	2014	2019
Triple-Negative Breast Carcinoma	C4722518	PDIK1L	149420	Q8N165	PDLIM1 interacting kinase 1 like	Kinase	138	0.534	0.769	0.26436	0.01		1	1	0	2015	2015
Triple-Negative Breast Carcinoma	C4722518	PDLIM2	64236	Q96JY6	PDZ and LIM domain 2	Cellular structure	42	0.65	0.385	0.00022117	0.01		1	1	0	2019	2019
Triple-Negative Breast Carcinoma	C4722518	PDPN	10630	Q86YL7	podoplanin		256	0.47	0.769	0.00032048	0.01		1	1	0	2015	2015
Triple-Negative Breast Carcinoma	C4722518	PEA15	8682	Q15121	proliferation and apoptosis adaptor protein 15		110	0.553	0.692	0.79212	0.02		1	2	0	2012	2015
Triple-Negative Breast Carcinoma	C4722518	PEBP1	5037	P30086	phosphatidylethanolamine binding protein 1	Enzyme modulator	181	0.5	0.808	0.09167	0.01		1	1	0	2012	2012
Triple-Negative Breast Carcinoma	C4722518	PECAM1	5175	P16284	platelet and endothelial cell adhesion molecule 1	Cell adhesion	396	0.426	0.846		0.01		1	1	0	2019	2019
Triple-Negative Breast Carcinoma	C4722518	PELP1	27043	Q8IZL8	proline, glutamate and leucine rich protein 1		64	0.612	0.577	0.99998	0.03		1	3	0	2015	2016
Triple-Negative Breast Carcinoma	C4722518	PEX14	5195	O75381	peroxisomal biogenesis factor 14	Receptor	133	0.592	0.692	0.22566	0.01		1	1	0	2017	2017
Triple-Negative Breast Carcinoma	C4722518	PFDN5	5204	Q99471	prefoldin subunit 5	Chaperone	24	0.716	0.5	0.00056773	0.01		1	1	0	2019	2019
Triple-Negative Breast Carcinoma	C4722518	PFN1	5216	P07737	profilin 1		119	0.565	0.769	0.73258	0.01		1	1	0	2013	2013
Triple-Negative Breast Carcinoma	C4722518	PGF	5228	P49763	placental growth factor	Signaling	288	0.46	0.846	0.1288	0.01		1	1	0	2017	2017
Triple-Negative Breast Carcinoma	C4722518	PGR	5241	P06401	progesterone receptor	Nuclear receptor	392	0.426	0.885	0.051042	0.1		0.756	123	0	2009	2020
Triple-Negative Breast Carcinoma	C4722518	PHGDH	26227	O43175	phosphoglycerate dehydrogenase	Enzyme	288	0.484	0.885	0.00013308	0.02		1	2	0	2016	2020
Triple-Negative Breast Carcinoma	C4722518	PIK3CA	5290	P42336	phosphatidylinositol-4,5-bisphosphate 3-kinase catalytic subunit alpha	Kinase	1511	0.292	0.923	1	0.1		0.971	70	0	2012	2020
Triple-Negative Breast Carcinoma	C4722518	PIK3CB	5291	P42338	phosphatidylinositol-4,5-bisphosphate 3-kinase catalytic subunit beta	Kinase	1083	0.322	0.885	0.99964	0.1		0.984	61	0	2012	2020
Triple-Negative Breast Carcinoma	C4722518	PIK3CD	5293	O00329	phosphatidylinositol-4,5-bisphosphate 3-kinase catalytic subunit delta	Kinase	1119	0.319	0.885	0.99999	0.1		0.984	61	0	2012	2020
Triple-Negative Breast Carcinoma	C4722518	PIK3CG	5294	P48736	phosphatidylinositol-4,5-bisphosphate 3-kinase catalytic subunit gamma	Kinase	1101	0.32	0.885	1.4076e-06	0.1		0.984	62	0	2012	2020
Triple-Negative Breast Carcinoma	C4722518	PIK3R1	5295	P27986	phosphoinositide-3-kinase regulatory subunit 1	Kinase	285	0.477	0.885	0.99978	0.01		1	1	0	2018	2018
Triple-Negative Breast Carcinoma	C4722518	PIK3R3	8503	Q92569	phosphoinositide-3-kinase regulatory subunit 3	Enzyme modulator	101	0.556	0.692	3.3583e-10	0.01		1	1	0	2014	2014
Triple-Negative Breast Carcinoma	C4722518	PIM1	5292	P11309	Pim-1 proto-oncogene, serine/threonine kinase	Kinase	224	0.482	0.769	0.84846	0.04		1	4	0	2016	2019
Triple-Negative Breast Carcinoma	C4722518	PIMREG	54478	Q9BSJ6	PICALM interacting mitotic regulator		20	0.729	0.385	0.0011659	0.01		1	1	0	2014	2014
Triple-Negative Breast Carcinoma	C4722518	PIN1	5300	Q13526	peptidylprolyl cis/trans isomerase, NIMA-interacting 1		212	0.488	0.769	0.74031	0.01		1	1	0	2017	2017
Triple-Negative Breast Carcinoma	C4722518	PIP	5304	P12273	prolactin induced protein		109	0.556	0.808	0.00068286	0.02		1	2	0	2017	2019
Triple-Negative Breast Carcinoma	C4722518	PITX2	5308	Q99697	paired like homeodomain 2		248	0.489	0.808	0.97618	0.01		1	1	0	2018	2018
Triple-Negative Breast Carcinoma	C4722518	PIWIL1	9271	Q96J94	piwi like RNA-mediated gene silencing 1		99	0.57	0.731	7.2798e-14	0.01		1	1	0	2020	2020
Triple-Negative Breast Carcinoma	C4722518	PIWIL4	143689	Q7Z3Z4	piwi like RNA-mediated gene silencing 4		83	0.579	0.692	1.8323e-06	0.01		1	1	0	2020	2020
Triple-Negative Breast Carcinoma	C4722518	PKD1	5310	P98161	polycystin 1, transient receptor potential channel interacting		217	0.493	0.769	1	0.01		1	1	0	2018	2018
Triple-Negative Breast Carcinoma	C4722518	PKD2	5311	Q13563	polycystin 2, transient receptor potential cation channel	Ion channel	122	0.552	0.731	0.00017271	0.01		1	1	0	2013	2013
Triple-Negative Breast Carcinoma	C4722518	PKD3	5312		polycystic kidney disease 3 (autosomal dominant)		16	0.76	0.308		0.01		1	1	0	2013	2013
Triple-Negative Breast Carcinoma	C4722518	PKM	5315	P14618	pyruvate kinase M1/2	Kinase	237	0.482	0.808	0.8549	0.03		1	3	0	2015	2019
Triple-Negative Breast Carcinoma	C4722518	PKN2	5586	Q16513	protein kinase N2	Kinase	29	0.711	0.423	1	0.01		1	1	0	2017	2017
Triple-Negative Breast Carcinoma	C4722518	PLAUR	5329	Q03405	plasminogen activator, urokinase receptor		147	0.536	0.731	0.0053378	0.02		1	2	0	2015	2020
Triple-Negative Breast Carcinoma	C4722518	PLCD1	5333	P51178	phospholipase C delta 1	Enzyme	62	0.636	0.577	1.737e-19	0.01		1	1	0	2017	2017
Triple-Negative Breast Carcinoma	C4722518	PLIN1	5346	O60240	perilipin 1		85	0.59	0.654	3.1486e-11	0.01		1	1	0	2019	2019
Triple-Negative Breast Carcinoma	C4722518	PLIN4	729359	Q96Q06	perilipin 4		14	0.821	0.231	5.578e-16	0.01		1	1	0	2019	2019
Triple-Negative Breast Carcinoma	C4722518	PLK1	5347	P53350	polo like kinase 1	Kinase	253	0.467	0.808	0.97851	0.07		1	7	0	2012	2019
Triple-Negative Breast Carcinoma	C4722518	PLXNA1	5361	Q9UIW2	plexin A1		62	0.621	0.615	0.99951	0.01		1	1	0	2017	2017
Triple-Negative Breast Carcinoma	C4722518	PMAIP1	5366	Q13794	phorbol-12-myristate-13-acetate-induced protein 1		109	0.559	0.808	0.11182	0.02		1	2	0	2015	2017
Triple-Negative Breast Carcinoma	C4722518	PML	5371	P29590	promyelocytic leukemia		274	0.477	0.846	0.21291	0.02		1	2	0	2017	2020
Triple-Negative Breast Carcinoma	C4722518	POLD1	5424	P28340	DNA polymerase delta 1, catalytic subunit		189	0.507	0.769	2.4179e-06	0.04		1	4	1	2014	2019
Triple-Negative Breast Carcinoma	C4722518	POLDIP2	26073	Q9Y2S7	DNA polymerase delta interacting protein 2		530	0.396	0.923	0.41407	0.03		1	3	0	2018	2019
Triple-Negative Breast Carcinoma	C4722518	POLE	5426	Q07864	DNA polymerase epsilon, catalytic subunit		151	0.526	0.731	8.0488e-27	0.01		1	1	0	2019	2019
Triple-Negative Breast Carcinoma	C4722518	POLR2A	5430	P24928	RNA polymerase II subunit A	Enzyme	47	0.65	0.423	1	0.02		1	2	0	2019	2019
Triple-Negative Breast Carcinoma	C4722518	POR	5447	P16435	cytochrome p450 oxidoreductase		218	0.502	0.769	3.4212e-10	0.01		1	1	0	2019	2019
Triple-Negative Breast Carcinoma	C4722518	POU3F3	5455	P20264	POU class 3 homeobox 3		34	0.682	0.615	0.88278	0.01		1	1	0	2019	2019
Triple-Negative Breast Carcinoma	C4722518	POU5F1	5460	Q01860	POU class 5 homeobox 1		328	0.441	0.846	0.95371	0.02		1	2	0	2012	2015
Triple-Negative Breast Carcinoma	C4722518	POU5F1P3	642559		POU class 5 homeobox 1 pseudogene 3		285	0.452	0.808		0.02		1	2	0	2012	2015
Triple-Negative Breast Carcinoma	C4722518	POU5F1P4	645682		POU class 5 homeobox 1 pseudogene 4		284	0.452	0.808		0.02		1	2	0	2012	2015
Triple-Negative Breast Carcinoma	C4722518	PPARA	5465	Q07869	peroxisome proliferator activated receptor alpha	Nuclear receptor	408	0.432	0.885	0.030182	0.02		1	2	0	2014	2018
Triple-Negative Breast Carcinoma	C4722518	PPARG	5468	P37231	peroxisome proliferator activated receptor gamma	Nuclear receptor	877	0.358	0.885	0.029194	0.01		1	1	0	2011	2011
Triple-Negative Breast Carcinoma	C4722518	PPIG	9360	Q13427	peptidylprolyl isomerase G		203	0.497	0.846	0.96292	0.01		1	1	0	2019	2019
Triple-Negative Breast Carcinoma	C4722518	PPL	5493	O60437	periplakin	Cellular structure	50	0.666	0.538	1.5145e-42	0.01		1	1	0	2014	2014
Triple-Negative Breast Carcinoma	C4722518	PPP1R2C	80316	O14990	PPP1R2C family member C	Enzyme modulator	231	0.478	0.846		0.01		1	1	0	2014	2014
Triple-Negative Breast Carcinoma	C4722518	PRDM13	59336	Q9H4Q3	PR/SET domain 13		12	0.78	0.231	0.56307	0.01		1	1	0	2019	2019
Triple-Negative Breast Carcinoma	C4722518	PRDM14	63978	Q9GZV8	PR/SET domain 14		43	0.644	0.5	0.019397	0.01		1	1	0	2018	2018
Triple-Negative Breast Carcinoma	C4722518	PRDX2	7001	P32119	peroxiredoxin 2	Enzyme	243	0.474	0.885	0.086513	0.01		1	1	0	2019	2019
Triple-Negative Breast Carcinoma	C4722518	PRDX5	25824	P30044	peroxiredoxin 5		153	0.522	0.808	0.00017921	0.02		1	2	0	2018	2020
Triple-Negative Breast Carcinoma	C4722518	PRF1	5551	P14222	perforin 1		163	0.54	0.692	5.4875e-06	0.01		1	1	0	2016	2016
Triple-Negative Breast Carcinoma	C4722518	PRICKLE1	144165	Q96MT3	prickle planar cell polarity protein 1	Cellular structure	57	0.647	0.615	0.99999	0.01		1	1	0	2019	2019
Triple-Negative Breast Carcinoma	C4722518	PRKAA1	5562	Q13131	protein kinase AMP-activated catalytic subunit alpha 1	Kinase	325	0.453	0.846	0.13725	0.05		1	5	0	2016	2019
Triple-Negative Breast Carcinoma	C4722518	PRKAA2	5563	P54646	protein kinase AMP-activated catalytic subunit alpha 2	Kinase	317	0.456	0.846	3.5282e-08	0.05		1	5	0	2016	2019
Triple-Negative Breast Carcinoma	C4722518	PRKAB1	5564	Q9Y478	protein kinase AMP-activated non-catalytic subunit beta 1	Kinase	296	0.46	0.846	0.0052573	0.05		1	5	0	2016	2019
Triple-Negative Breast Carcinoma	C4722518	PRKAR1A	5573	P10644	protein kinase cAMP-dependent type I regulatory subunit alpha		597	0.401	0.846	0.99985	0.03		1	3	0	2018	2019
Triple-Negative Breast Carcinoma	C4722518	PRKCA	5578	P17252	protein kinase C alpha	Kinase	368	0.44	0.846	0.3677	0.04		1	4	0	2014	2017
Triple-Negative Breast Carcinoma	C4722518	PRKCB	5579	P05771	protein kinase C beta	Kinase	317	0.453	0.885	1	0.01		1	1	0	2017	2017
Triple-Negative Breast Carcinoma	C4722518	PRKD1	5587	Q15139	protein kinase D1	Kinase	171	0.531	0.846	6.6485e-07	0.02		1	2	0	2018	2019
Triple-Negative Breast Carcinoma	C4722518	PRKD2	25865	Q9BZL6	protein kinase D2	Kinase	40	0.666	0.538	0.99995	0.01		1	1	0	2019	2019
Triple-Negative Breast Carcinoma	C4722518	PRKD3	23683	O94806	protein kinase D3	Kinase	22	0.76	0.154	0.0052882	0.03		1	3	0	2014	2019
Triple-Negative Breast Carcinoma	C4722518	PRKN	5071	O60260	parkin RBR E3 ubiquitin protein ligase	Enzyme	409	0.431	0.846	6.9346e-07	0.03		1	3	1	2018	2020
Triple-Negative Breast Carcinoma	C4722518	PRL	5617	P01236	prolactin	Signaling	506	0.406	0.885	2.9015e-07	0.01		1	1	0	2019	2019
Triple-Negative Breast Carcinoma	C4722518	PRMT1	3276	Q99873	protein arginine methyltransferase 1	Epigenetic regulator	110	0.552	0.808	0.99907	0.01		1	1	0	2018	2018
Triple-Negative Breast Carcinoma	C4722518	PROCR	10544	Q9UNN8	protein C receptor	Enzyme modulator	110	0.56	0.692	0.0056256	0.02		1	2	0	2019	2019
Triple-Negative Breast Carcinoma	C4722518	PROM1	8842	O43490	prominin 1	Transporter	477	0.41	0.846	1.9485e-22	0.06		1	6	0	2012	2020
Triple-Negative Breast Carcinoma	C4722518	PRRT2	112476	Q7Z6L0	proline rich transmembrane protein 2		353	0.448	0.808	0.57919	0.01		1	1	0	2017	2017
Triple-Negative Breast Carcinoma	C4722518	PRRX1	5396	P54821	paired related homeobox 1		134	0.543	0.769	0.24291	0.01		1	1	0	2016	2016
Triple-Negative Breast Carcinoma	C4722518	PRRX2	51450	Q99811	paired related homeobox 2		46	0.638	0.577	0.13959	0.01		1	1	0	2017	2017
Triple-Negative Breast Carcinoma	C4722518	PRSS55	203074	Q6UWB4	serine protease 55	Enzyme	163	0.513	0.769	3.1731e-11	0.01		1	1	0	2015	2015
Triple-Negative Breast Carcinoma	C4722518	PSAT1	29968	Q9Y617	phosphoserine aminotransferase 1		285	0.478	0.846	1.0621e-08	0.01		1	1	0	2020	2020
Triple-Negative Breast Carcinoma	C4722518	PSIP1	11168	O75475	PC4 and SFRS1 interacting protein 1	Signaling	210	0.49	0.846	0.99668	0.03		1	3	0	2017	2019
Triple-Negative Breast Carcinoma	C4722518	PSMB5	5693	P28074	proteasome 20S subunit beta 5		27	0.711	0.385	0.95893	0.01		1	1	0	2018	2018
Triple-Negative Breast Carcinoma	C4722518	PSMC3IP	29893	Q9P2W1	PSMC3 interacting protein	Nucleic acid binding	53	0.659	0.5	3.7819e-05	0.01		1	1	0	2015	2015
Triple-Negative Breast Carcinoma	C4722518	PSMD14	10213	O00487	proteasome 26S subunit, non-ATPase 14	Enzyme	29	0.716	0.308	0.97662	0.01		1	1	0	2017	2017
Triple-Negative Breast Carcinoma	C4722518	PSMD9	5715	O00233	proteasome 26S subunit, non-ATPase 9	Enzyme modulator	344	0.435	0.846	4.8603e-06	0.04		1	4	0	2014	2019
Triple-Negative Breast Carcinoma	C4722518	PTCSC3	100886964		papillary thyroid carcinoma susceptibility candidate 3		23	0.722	0.385		0.01		1	1	0	2019	2019
Triple-Negative Breast Carcinoma	C4722518	PTEN	5728	P60484	phosphatase and tensin homolog	Enzyme	1349	0.305	0.923	0.25651	0.1		1	28	1	2013	2020
Triple-Negative Breast Carcinoma	C4722518	PTGS2	5743	P35354	prostaglandin-endoperoxide synthase 2	Enzyme	1234	0.314	0.962	0.99597	0.03		1	3	0	2017	2019
Triple-Negative Breast Carcinoma	C4722518	PTK2	5747	Q05397	protein tyrosine kinase 2	Kinase	205	0.497	0.808	0.99987	0.02		1	2	0	2017	2019
Triple-Negative Breast Carcinoma	C4722518	PTK2B	2185	Q14289	protein tyrosine kinase 2 beta	Kinase	319	0.448	0.808	0.93536	0.06		1	6	0	2017	2019
Triple-Negative Breast Carcinoma	C4722518	PTK6	5753	Q13882	protein tyrosine kinase 6	Kinase	48	0.65	0.269	4.3468e-13	0.02		1	2	0	2016	2016
Triple-Negative Breast Carcinoma	C4722518	PTK7	5754	Q13308	protein tyrosine kinase 7 (inactive)	Kinase	96	0.568	0.615	0.99721	0.01		1	1	0	2017	2017
Triple-Negative Breast Carcinoma	C4722518	PTN	5764	P21246	pleiotrophin	Signaling	164	0.515	0.808	0.0075073	0.01		1	1	0	2018	2018
Triple-Negative Breast Carcinoma	C4722518	PTP4A3	11156	O75365	protein tyrosine phosphatase 4A3		106	0.566	0.654	0.045489	0.02		1	2	0	2016	2016
Triple-Negative Breast Carcinoma	C4722518	PTPA	5524	Q15257	protein phosphatase 2 phosphatase activator	Enzyme modulator	245	0.48	0.846	0.99057	0.02		1	2	0	2017	2019
Triple-Negative Breast Carcinoma	C4722518	PTPN11	5781	Q06124	protein tyrosine phosphatase non-receptor type 11		702	0.385	0.923	0.99998	0.03		1	3	0	2015	2016
Triple-Negative Breast Carcinoma	C4722518	PTPN12	5782	Q05209	protein tyrosine phosphatase non-receptor type 12		48	0.641	0.769	0.99996	0.04		1	4	0	2011	2018
Triple-Negative Breast Carcinoma	C4722518	PTPN22	26191	Q9Y2R2	protein tyrosine phosphatase non-receptor type 22		400	0.438	0.846	3.4921e-21	0.03		1	3	0	2018	2019
Triple-Negative Breast Carcinoma	C4722518	PTPN3	5774	P26045	protein tyrosine phosphatase non-receptor type 3		51	0.647	0.462	6.706e-09	0.01		1	1	0	2018	2018
Triple-Negative Breast Carcinoma	C4722518	PTPN6	5777	P29350	protein tyrosine phosphatase non-receptor type 6		218	0.485	0.769	0.99999	0.03		1	3	0	2016	2017
Triple-Negative Breast Carcinoma	C4722518	PTPN7	5778	P35236	protein tyrosine phosphatase non-receptor type 7	Enzyme	20	0.736	0.385	9.4147e-14	0.01		1	1	0	2019	2019
Triple-Negative Breast Carcinoma	C4722518	PTPRA	5786	P18433	protein tyrosine phosphatase receptor type A	Enzyme	91	0.573	0.654	0.99998	0.01		1	1	0	2019	2019
Triple-Negative Breast Carcinoma	C4722518	PTPRC	5788	P08575	protein tyrosine phosphatase receptor type C	Enzyme	366	0.435	0.808	1	0.02		1	2	0	2019	2020
Triple-Negative Breast Carcinoma	C4722518	PTPRF	5792	P10586	protein tyrosine phosphatase receptor type F	Enzyme	95	0.578	0.615	1	0.04		1	4	0	2015	2019
Triple-Negative Breast Carcinoma	C4722518	PTPRZ1	5803	P23471	protein tyrosine phosphatase receptor type Z1	Enzyme	61	0.623	0.615	0.98997	0.01		1	1	0	2018	2018
Triple-Negative Breast Carcinoma	C4722518	PTTG1	9232	O95997	PTTG1 regulator of sister chromatid separation, securin		140	0.526	0.654	0.00042161	0.01		1	1	0	2014	2014
Triple-Negative Breast Carcinoma	C4722518	PTTG3P	26255	Q9NZH4	pituitary tumor-transforming 3, pseudogene		18	0.751	0.192		0.01		1	1	0	2019	2019
Triple-Negative Breast Carcinoma	C4722518	PVR	5817	P15151	PVR cell adhesion molecule		177	0.51	0.769	3.922e-10	0.02		1	2	0	2019	2020
Triple-Negative Breast Carcinoma	C4722518	PVT1	5820		Pvt1 oncogene		190	0.495	0.731		0.02		1	2	0	2018	2018
Triple-Negative Breast Carcinoma	C4722518	RAB1A	5861	P62820	RAB1A, member RAS oncogene family		56	0.623	0.615	0.82305	0.01		1	1	0	2017	2017
Triple-Negative Breast Carcinoma	C4722518	RAB1B	81876	Q9H0U4	RAB1B, member RAS oncogene family		25	0.705	0.423	0.88438	0.01		1	1	0	2015	2015
Triple-Negative Breast Carcinoma	C4722518	RAB25	57111	P57735	RAB25, member RAS oncogene family		53	0.628	0.385	1.1227e-07	0.01		1	1	0	2010	2010
Triple-Negative Breast Carcinoma	C4722518	RAB27A	5873	P51159	RAB27A, member RAS oncogene family		108	0.585	0.692	3.0027e-07	0.01		1	1	0	2016	2016
Triple-Negative Breast Carcinoma	C4722518	RAB5A	5868	P20339	RAB5A, member RAS oncogene family		67	0.601	0.731	0.62452	0.01		1	1	0	2019	2019
Triple-Negative Breast Carcinoma	C4722518	RAB6A	5870	P20340	RAB6A, member RAS oncogene family		27	0.716	0.462	0.95237	0.02		1	2	0	2016	2019
Triple-Negative Breast Carcinoma	C4722518	RAB7A	7879	P51149	RAB7A, member RAS oncogene family		95	0.597	0.692	0.96933	0.01		1	1	0	2020	2020
Triple-Negative Breast Carcinoma	C4722518	RAB7B	338382	Q96AH8	RAB7B, member RAS oncogene family		65	0.615	0.731		0.01		1	1	0	2020	2020
Triple-Negative Breast Carcinoma	C4722518	RABEP2	79874	Q9H5N1	rabaptin, RAB GTPase binding effector protein 2		36	0.682	0.654	0.0011388	0.01		1	1	0	2018	2018
Triple-Negative Breast Carcinoma	C4722518	RAC1	5879	P63000	Rac family small GTPase 1	Enzyme modulator	415	0.429	0.962	0.76228	0.06		1	6	0	2014	2019
Triple-Negative Breast Carcinoma	C4722518	RACK1	10399	P63244	receptor for activated C kinase 1		118	0.545	0.808	0.99836	0.01		1	1	0	2019	2019
Triple-Negative Breast Carcinoma	C4722518	RAD51	5888	Q06609	RAD51 recombinase		363	0.447	0.846	0.026578	0.1		1	12	0	2014	2019
Triple-Negative Breast Carcinoma	C4722518	RAD51AP1	10635	Q96B01	RAD51 associated protein 1		23	0.705	0.308	0.011096	0.01		1	1	0	2019	2019
Triple-Negative Breast Carcinoma	C4722518	RAD51B	5890	O15315	RAD51 paralog B		126	0.556	0.769	2.079e-15	0.01		1	1	1	2011	2011
Triple-Negative Breast Carcinoma	C4722518	RAD51D	5892	O75771	RAD51 paralog D		36	0.674	0.385	1.0631e-09	0.01		1	1	0	2018	2018
Triple-Negative Breast Carcinoma	C4722518	RAF1	5894	P04049	Raf-1 proto-oncogene, serine/threonine kinase	Kinase	470	0.418	0.885	0.85295	0.01		1	1	0	2018	2018
Triple-Negative Breast Carcinoma	C4722518	RALBP1	10928	Q15311	ralA binding protein 1	Enzyme modulator	134	0.536	0.654	0.14667	0.02		1	2	0	2016	2016
Triple-Negative Breast Carcinoma	C4722518	RAPGEF3	10411	O95398	Rap guanine nucleotide exchange factor 3	Enzyme modulator	99	0.593	0.692	7.0737e-23	0.01		1	1	0	2018	2018
Triple-Negative Breast Carcinoma	C4722518	RARA	5914	P10276	retinoic acid receptor alpha	Nuclear receptor	274	0.47	0.846	0.96305	0.01		1	1	0	2018	2018
Triple-Negative Breast Carcinoma	C4722518	RARB	5915	P10826	retinoic acid receptor beta	Nuclear receptor	254	0.478	0.846	0.99983	0.01		1	1	0	2015	2015
Triple-Negative Breast Carcinoma	C4722518	RASA1	5921	P20936	RAS p21 protein activator 1	Enzyme modulator	237	0.481	0.885	1	0.01		1	1	0	2015	2015
Triple-Negative Breast Carcinoma	C4722518	RASA4	10156	O43374	RAS p21 protein activator 4	Enzyme modulator	8	0.821	0.192	0.115	0.01		1	1	0	2019	2019
Triple-Negative Breast Carcinoma	C4722518	RASAL2	9462	Q9UJF2	RAS protein activator like 2	Enzyme modulator	38	0.67	0.346	0.79641	0.02		1	2	0	2014	2016
Triple-Negative Breast Carcinoma	C4722518	RASGRF1	5923	Q13972	Ras protein specific guanine nucleotide releasing factor 1	Enzyme modulator	124	0.537	0.769	0.99999	0.01		1	1	0	2018	2018
Triple-Negative Breast Carcinoma	C4722518	RASGRF2	5924	O14827	Ras protein specific guanine nucleotide releasing factor 2	Enzyme modulator	56	0.644	0.615	0.15243	0.01		0	1	0	2019	2019
Triple-Negative Breast Carcinoma	C4722518	RASGRP1	10125	O95267	RAS guanyl releasing protein 1	Enzyme modulator	110	0.572	0.731	0.96554	0.01		1	1	0	2018	2018
Triple-Negative Breast Carcinoma	C4722518	RASSF1	11186	Q9NS23	Ras association domain family member 1	Enzyme modulator	400	0.42	0.808	4.9255e-06	0.01		1	1	0	2019	2019
Triple-Negative Breast Carcinoma	C4722518	RASSF6	166824	Q6ZTQ3	Ras association domain family member 6	Enzyme modulator	53	0.626	0.654	2.7376e-26	0.01		1	1	0	2018	2018
Triple-Negative Breast Carcinoma	C4722518	RBM3	5935	P98179	RNA binding motif protein 3	Nucleic acid binding	73	0.595	0.654	0.82616	0.01		1	1	0	2019	2019
Triple-Negative Breast Carcinoma	C4722518	RCOR1	23186	Q9UKL0	REST corepressor 1		36	0.678	0.577	0.99992	0.01		1	1	0	2019	2019
Triple-Negative Breast Carcinoma	C4722518	RECQL	5965	P46063	RecQ like helicase	Enzyme	58	0.615	0.615	1.5345e-20	0.01		1	1	0	2019	2019
Triple-Negative Breast Carcinoma	C4722518	RECQL5	9400	O94762	RecQ like helicase 5	Enzyme	28	0.682	0.5	3.1723e-18	0.01		1	1	0	2019	2019
Triple-Negative Breast Carcinoma	C4722518	RELA	5970	Q04206	RELA proto-oncogene, NF-kB subunit	Transcription factor	483	0.406	0.885	0.99948	0.03		1	3	0	2016	2019
Triple-Negative Breast Carcinoma	C4722518	REST	5978	Q13127	RE1 silencing transcription factor	Transcription factor	178	0.535	0.808	0.99186	0.01		1	1	0	2014	2014
Triple-Negative Breast Carcinoma	C4722518	RET	5979	P07949	ret proto-oncogene	Kinase	607	0.392	0.885	1	0.01		1	1	0	2019	2019
Triple-Negative Breast Carcinoma	C4722518	RFC3	5983	P40938	replication factor C subunit 3	Enzyme	28	0.705	0.269	9.576e-06	0.01		1	1	0	2017	2017
Triple-Negative Breast Carcinoma	C4722518	RGMA	56963	Q96B86	repulsive guidance molecule BMP co-receptor a		43	0.656	0.692	0.16472	0.01		1	1	0	2019	2019
Triple-Negative Breast Carcinoma	C4722518	RGS20	8601	O76081	regulator of G protein signaling 20	Enzyme modulator	16	0.76	0.269	6.4013e-05	0.01		1	1	0	2017	2017
Triple-Negative Breast Carcinoma	C4722518	RGS3	5998	P49796	regulator of G protein signaling 3		21	0.722	0.385	2.2646e-11	0.01		1	1	0	2019	2019
Triple-Negative Breast Carcinoma	C4722518	RHOA	387	P61586	ras homolog family member A	Enzyme modulator	193	0.502	0.808	0.60405	0.01		1	1	0	2017	2017
Triple-Negative Breast Carcinoma	C4722518	RICTOR	253260	Q6R327	RPTOR independent companion of MTOR complex 2		82	0.592	0.615	1	0.02		1	2	0	2018	2018
Triple-Negative Breast Carcinoma	C4722518	RIPK1	8737	Q13546	receptor interacting serine/threonine kinase 1	Kinase	250	0.479	0.769	0.0079441	0.03		1	3	0	2016	2017
Triple-Negative Breast Carcinoma	C4722518	RIPK2	8767	O43353	receptor interacting serine/threonine kinase 2	Kinase	83	0.587	0.769	0.39282	0.01		1	1	0	2018	2018
Triple-Negative Breast Carcinoma	C4722518	RIT1	6016	Q92963	Ras like without CAAX 1	Enzyme modulator	184	0.527	0.808	0.13281	0.01		1	1	0	2018	2018
Triple-Negative Breast Carcinoma	C4722518	RMDN2	151393	Q96LZ7	regulator of microtubule dynamics 2		137	0.531	0.769	4.4061e-24	0.01		1	1	0	2020	2020
Triple-Negative Breast Carcinoma	C4722518	RMST	196475		rhabdomyosarcoma 2 associated transcript		19	0.769	0.385		0.01		1	1	0	2018	2018
Triple-Negative Breast Carcinoma	C4722518	RNASE3	6037	P12724	ribonuclease A family member 3		207	0.49	0.808		0.01		1	1	0	2018	2018
Triple-Negative Breast Carcinoma	C4722518	RND1	27289	Q92730	Rho family GTPase 1	Enzyme modulator	19	0.769	0.192	0.73701	0.01		1	1	0	2015	2015
Triple-Negative Breast Carcinoma	C4722518	RNF103-CHMP3	100526767	Q9Y3E7	RNF103-CHMP3 readthrough		10	0.821	0.269	0.0040006	0.01		1	1	0	2020	2020
Triple-Negative Breast Carcinoma	C4722518	RNF19A	25897	Q9NV58	ring finger protein 19A, RBR E3 ubiquitin protein ligase	Enzyme	523	0.397	0.923	0.025305	0.03		1	3	0	2018	2019
Triple-Negative Breast Carcinoma	C4722518	RNF8	9025	O76064	ring finger protein 8		27	0.695	0.462	0.99943	0.01		1	1	0	2013	2013
Triple-Negative Breast Carcinoma	C4722518	RNR1	4549	A0A0C5B5G6	s-rRNA		75	0.626	0.769		0.01		1	1	0	2018	2018
Triple-Negative Breast Carcinoma	C4722518	ROR1	4919	Q01973	receptor tyrosine kinase like orphan receptor 1	Kinase	109	0.552	0.731	0.99645	0.03		1	3	0	2016	2019
Triple-Negative Breast Carcinoma	C4722518	ROS1	6098	P08922	ROS proto-oncogene 1, receptor tyrosine kinase	Kinase	356	0.439	0.885	1.6184e-72	0.02		1	2	0	2018	2018
Triple-Negative Breast Carcinoma	C4722518	RPA1	6117	P27694	replication protein A1	Nucleic acid binding	59	0.619	0.692	0.08777	0.01		1	1	0	2019	2019
Triple-Negative Breast Carcinoma	C4722518	RPE65	6121	Q16518	retinoid isomerohydrolase RPE65	Enzyme	431	0.417	0.808	6.4889e-14	0.02		1	2	0	2011	2012
Triple-Negative Breast Carcinoma	C4722518	RPL39	6170	P62891	ribosomal protein L39	Nucleic acid binding	14	0.76	0.192	0.57637	0.01		1	1	0	2017	2017
Triple-Negative Breast Carcinoma	C4722518	RPLP1	6176	P05386	ribosomal protein lateral stalk subunit P1		13	0.821	0.115	0.37039	0.01		1	1	0	2018	2018
Triple-Negative Breast Carcinoma	C4722518	RPS27	6232	P42677	ribosomal protein S27	Nucleic acid binding	104	0.578	0.769	0.75663	0.03		1	3	0	2015	2019
Triple-Negative Breast Carcinoma	C4722518	RPS6KA1	6195	Q15418	ribosomal protein S6 kinase A1	Kinase	68	0.619	0.654	0.0019056	0.04		1	4	0	2015	2019
Triple-Negative Breast Carcinoma	C4722518	RPS6KA2	6196	Q15349	ribosomal protein S6 kinase A2	Kinase	54	0.636	0.538	0.0094073	0.02		1	2	0	2015	2016
Triple-Negative Breast Carcinoma	C4722518	RPS6KA3	6197	P51812	ribosomal protein S6 kinase A3	Kinase	315	0.491	0.846	0.99999	0.03		1	3	0	2012	2016
Triple-Negative Breast Carcinoma	C4722518	RPS6KB1	6198	P23443	ribosomal protein S6 kinase B1	Kinase	169	0.511	0.731	0.97285	0.03		1	3	0	2014	2019
Triple-Negative Breast Carcinoma	C4722518	RPTOR	57521	Q8N122	regulatory associated protein of MTOR complex 1		60	0.628	0.692	1	0.01		1	1	0	2018	2018
Triple-Negative Breast Carcinoma	C4722518	RRM1	6240	P23921	ribonucleotide reductase catalytic subunit M1	Enzyme	111	0.552	0.692	1	0.01		1	1	0	2012	2012
Triple-Negative Breast Carcinoma	C4722518	RSRC2	65117	Q7L4I2	arginine and serine rich coiled-coil 2		15	0.769	0.308	0.99905	0.01		1	1	0	2017	2017
Triple-Negative Breast Carcinoma	C4722518	RUNX1	861	Q01196	RUNX family transcription factor 1	Transcription factor	412	0.425	0.808	0.65377	0.01		1	1	0	2019	2019
Triple-Negative Breast Carcinoma	C4722518	RUNX2	860	Q13950	RUNX family transcription factor 2	Transcription factor	405	0.437	0.846	0.94884	0.02		1	2	0	2018	2019
Triple-Negative Breast Carcinoma	C4722518	RXRA	6256	P19793	retinoid X receptor alpha	Nuclear receptor	132	0.543	0.769	0.99852	0.01		1	1	0	2018	2018
Triple-Negative Breast Carcinoma	C4722518	S100A4	6275	P26447	S100 calcium binding protein A4	Calcium-binding protein	308	0.448	0.769	0.0061838	0.02		1	2	0	2015	2017
Triple-Negative Breast Carcinoma	C4722518	S100A8	6279	P05109	S100 calcium binding protein A8	Calcium-binding protein	369	0.43	0.962	0.13761	0.01		1	1	0	2018	2018
Triple-Negative Breast Carcinoma	C4722518	SAA1	6288	P0DJI8	serum amyloid A1	Transporter	188	0.513	0.808	0.01493	0.01		1	1	0	2019	2019
Triple-Negative Breast Carcinoma	C4722518	SAA2	6289	P0DJI9	serum amyloid A2	Transporter	103	0.568	0.731	2.7019e-06	0.01		1	1	0	2019	2019
Triple-Negative Breast Carcinoma	C4722518	SAFB	6294	Q15424	scaffold attachment factor B		76	0.592	0.654	1	0.01		1	1	0	2017	2017
Triple-Negative Breast Carcinoma	C4722518	SARDH	1757	Q9UL12	sarcosine dehydrogenase	Enzyme	166	0.523	0.846	5.2689e-16	0.01		1	1	0	2019	2019
Triple-Negative Breast Carcinoma	C4722518	SARNP	84324	P82979	SAP domain containing ribonucleoprotein		33	0.678	0.5	0.99574	0.01		1	1	0	2020	2020
Triple-Negative Breast Carcinoma	C4722518	SASH1	23328	O94885	SAM and SH3 domain containing 1		67	0.599	0.538	0.001802	0.01		1	1	0	2018	2018
Triple-Negative Breast Carcinoma	C4722518	SATB2	23314	Q9UPW6	SATB homeobox 2	Transcription factor	233	0.503	0.769	0.99999	0.01		1	1	0	2016	2016
Triple-Negative Breast Carcinoma	C4722518	SCGB3A1	92304	Q96QR1	secretoglobin family 3A member 1		55	0.633	0.654	0.030493	0.01		1	1	0	2015	2015
Triple-Negative Breast Carcinoma	C4722518	SCN8A	6334	Q9UQD0	sodium voltage-gated channel alpha subunit 8	Ion channel	302	0.51	0.731	1	0.01		1	1	0	2017	2017
Triple-Negative Breast Carcinoma	C4722518	SCUBE2	57758	Q9NQ36	signal peptide, CUB domain and EGF like domain containing 2	Extracellular structure	25	0.743	0.231	3.5629e-21	0.01		1	1	0	2018	2018
Triple-Negative Breast Carcinoma	C4722518	SCYL1	57410	Q96KG9	SCY1 like pseudokinase 1	Kinase	104	0.582	0.769	2.5187e-08	0.01		1	1	0	2017	2017
Triple-Negative Breast Carcinoma	C4722518	SDC1	6382	P18827	syndecan 1	Extracellular structure	323	0.445	0.769	0.0084118	0.02		1	2	0	2013	2018
Triple-Negative Breast Carcinoma	C4722518	SDCBP	6386	O00560	syndecan binding protein	Transporter	45	0.653	0.385	0.00058136	0.02		1	2	0	2017	2018
Triple-Negative Breast Carcinoma	C4722518	SDS	10993	P20132	serine dehydratase	Enzyme	139	0.534	0.769	0.00013923	0.01		1	1	0	2020	2020
Triple-Negative Breast Carcinoma	C4722518	SELE	6401	P16581	selectin E		327	0.447	0.808	7.9058e-10	0.01		1	1	0	2019	2019
Triple-Negative Breast Carcinoma	C4722518	SEMA3A	10371	Q14563	semaphorin 3A	Signaling	202	0.5	0.808	0.9779	0.01		1	1	0	2019	2019
Triple-Negative Breast Carcinoma	C4722518	SEMG1	6406	P04279	semenogelin 1		54	0.628	0.615	0.35697	0.01		1	1	0	2018	2018
Triple-Negative Breast Carcinoma	C4722518	SENP2	59343	Q9HC62	SUMO specific peptidase 2	Enzyme	49	0.663	0.577	0.98262	0.01		1	1	0	2018	2018
Triple-Negative Breast Carcinoma	C4722518	SEPHS2	22928	Q99611	selenophosphate synthetase 2	Enzyme	6	0.839	0.077	0.0022195	0.01		1	1	0	2019	2019
Triple-Negative Breast Carcinoma	C4722518	SEPTIN4	5414	O43236;Q8NEP4	septin 4	Enzyme modulator	48	0.644	0.692	2.7268e-05	0.01		1	1	0	2016	2016
Triple-Negative Breast Carcinoma	C4722518	SERPINA1	5265	P01009	serpin family A member 1	Enzyme modulator	482	0.41	0.923	6.8497e-08	0.02		1	2	0	2018	2019
Triple-Negative Breast Carcinoma	C4722518	SERPINB2	5055	P05120	serpin family B member 2	Enzyme modulator	183	0.502	0.808	6.3773e-12	0.01		1	1	0	2020	2020
Triple-Negative Breast Carcinoma	C4722518	SERPINE1	5054	P05121	serpin family E member 1	Enzyme modulator	770	0.359	0.885	0.043609	0.04		1	4	0	2016	2019
Triple-Negative Breast Carcinoma	C4722518	SERPINF1	5176	P36955	serpin family F member 1	Enzyme modulator	294	0.46	0.846	7.8044e-08	0.01		1	1	0	2019	2019
Triple-Negative Breast Carcinoma	C4722518	SESN2	83667	P58004	sestrin 2	Enzyme	169	0.508	0.808	4.1912e-07	0.01		1	1	0	2014	2014
Triple-Negative Breast Carcinoma	C4722518	SET	6418	Q01105	SET nuclear proto-oncogene	Enzyme modulator	183	0.507	0.808	0.99597	0.01		1	1	0	2019	2019
Triple-Negative Breast Carcinoma	C4722518	SETBP1	26040	Q9Y6X0	SET binding protein 1		257	0.503	0.808	1	0.01		1	1	0	2017	2017
Triple-Negative Breast Carcinoma	C4722518	SETD1A	9739	O15047	SET domain containing 1A, histone lysine methyltransferase		68	0.619	0.615	1	0.01		1	1	0	2019	2019
Triple-Negative Breast Carcinoma	C4722518	SETD2	29072	Q9BYW2	SET domain containing 2, histone lysine methyltransferase	Epigenetic regulator	447	0.424	0.846	1	0.04		1	4	0	2014	2018
Triple-Negative Breast Carcinoma	C4722518	SFPQ	6421	P23246	splicing factor proline and glutamine rich	Nucleic acid binding	75	0.593	0.654	0.99992	0.01		1	1	0	2019	2019
Triple-Negative Breast Carcinoma	C4722518	SFRP1	6422	Q8N474	secreted frizzled related protein 1		227	0.479	0.846	0.96457	0.02		1	2	0	2014	2019
Triple-Negative Breast Carcinoma	C4722518	SFRP2	6423	Q96HF1	secreted frizzled related protein 2		134	0.544	0.731	0.0016693	0.02		1	2	0	2018	2019
Triple-Negative Breast Carcinoma	C4722518	SGSM3	27352	Q96HU1	small G protein signaling modulator 3	Enzyme	259	0.469	0.808	3.4061e-15	0.02		1	2	0	2014	2016
Triple-Negative Breast Carcinoma	C4722518	SIAH1	6477	Q8IUQ4	siah E3 ubiquitin protein ligase 1		54	0.631	0.538	0.69866	0.01		1	1	0	2016	2016
Triple-Negative Breast Carcinoma	C4722518	SIDT1	54847	Q9NXL6	SID1 transmembrane family member 1		9	0.821	0.192	6.5084e-15	0.01		1	1	0	2019	2019
Triple-Negative Breast Carcinoma	C4722518	SIGLEC7	27036	Q9Y286	sialic acid binding Ig like lectin 7	Receptor	137	0.535	0.846	2.388e-07	0.01		1	1	0	2019	2019
Triple-Negative Breast Carcinoma	C4722518	SIK2	23235	Q9H0K1	salt inducible kinase 2	Kinase	38	0.674	0.577	0.99651	0.01		1	1	0	2016	2016
Triple-Negative Breast Carcinoma	C4722518	SIN3A	25942	Q96ST3	SIN3 transcription regulator family member A	Enzyme	184	0.551	0.692	1	0.04		1	4	0	2015	2018
Triple-Negative Breast Carcinoma	C4722518	SIN3B	23309	O75182	SIN3 transcription regulator family member B	Enzyme	21	0.743	0.308	0.99999	0.01		1	1	0	2016	2016
Triple-Negative Breast Carcinoma	C4722518	SIRT1	23411	Q96EB6	sirtuin 1	Epigenetic regulator	675	0.378	0.885	0.087326	0.06		1	6	0	2015	2019
Triple-Negative Breast Carcinoma	C4722518	SIRT5	23408	Q9NXA8	sirtuin 5	Epigenetic regulator	63	0.61	0.615	8.6584e-10	0.01		1	1	0	2018	2018
Triple-Negative Breast Carcinoma	C4722518	SIX2	10736	Q9NPC8	SIX homeobox 2	Transcription factor	79	0.604	0.654	0.93869	0.01		1	1	0	2019	2019
Triple-Negative Breast Carcinoma	C4722518	SKA1	220134	Q96BD8	spindle and kinetochore associated complex subunit 1		42	0.65	0.462	1.7022e-05	0.01		1	1	0	2019	2019
Triple-Negative Breast Carcinoma	C4722518	SKI	6497	P12755	SKI proto-oncogene		255	0.503	0.808	0.99901	0.01		1	1	0	2014	2014
Triple-Negative Breast Carcinoma	C4722518	SKP2	6502	Q13309	S-phase kinase associated protein 2		204	0.492	0.808	0.96042	0.03		1	3	0	2014	2018
Triple-Negative Breast Carcinoma	C4722518	SLC11A2	4891	P49281	solute carrier family 11 member 2	Transporter	99	0.566	0.769	0.0066528	0.01		1	1	0	2019	2019
Triple-Negative Breast Carcinoma	C4722518	SLC16A1	6566	P53985	solute carrier family 16 member 1	Transporter	195	0.499	0.846	0.00073565	0.03		1	3	0	2018	2019
Triple-Negative Breast Carcinoma	C4722518	SLC16A3	9123	O15427	solute carrier family 16 member 3	Transporter	122	0.542	0.731	0.00029385	0.02		1	2	0	2018	2018
Triple-Negative Breast Carcinoma	C4722518	SLC16A4	9122	O15374	solute carrier family 16 member 4	Transporter	114	0.55	0.731	9.6707e-08	0.02		1	2	0	2018	2018
Triple-Negative Breast Carcinoma	C4722518	SLC1A5	6510	Q15758	solute carrier family 1 member 5	Transporter	81	0.587	0.577	0.16869	0.02		1	2	0	2019	2019
Triple-Negative Breast Carcinoma	C4722518	SLC22A17	51310	Q8WUG5	solute carrier family 22 member 17	Transporter	22	0.736	0.462	0.010603	0.01		1	1	0	2014	2014
Triple-Negative Breast Carcinoma	C4722518	SLC22A18	5002	Q96BI1	solute carrier family 22 member 18	Transporter	76	0.595	0.692	6.458e-06	0.01		1	1	0	2017	2017
Triple-Negative Breast Carcinoma	C4722518	SLC22A23	63027	A1A5C7	solute carrier family 22 member 23	Transporter	18	0.769	0.269	0.82731	0.01		1	1	0	2018	2018
Triple-Negative Breast Carcinoma	C4722518	SLC22A3	6581	O75751	solute carrier family 22 member 3	Transporter	154	0.531	0.846	7.7723e-10	0.02		1	2	0	2019	2019
Triple-Negative Breast Carcinoma	C4722518	SLC25A1	6576	P53007	solute carrier family 25 member 1	Transporter	168	0.553	0.731	0.058829	0.01		1	1	0	2016	2016
Triple-Negative Breast Carcinoma	C4722518	SLC25A16	8034	P16260	solute carrier family 25 member 16	Transporter	33	0.682	0.269	1.2089e-06	0.01		1	1	0	2015	2015
Triple-Negative Breast Carcinoma	C4722518	SLC27A4	10999	Q6P1M0	solute carrier family 27 member 4	Transporter	72	0.608	0.769	4.4885e-05	0.01		1	1	0	2015	2015
Triple-Negative Breast Carcinoma	C4722518	SLC2A1	6513	P11166	solute carrier family 2 member 1	Transporter	687	0.388	0.808	0.9941	0.03		1	3	0	2010	2019
Triple-Negative Breast Carcinoma	C4722518	SLC2A2	6514	P11168	solute carrier family 2 member 2	Transporter	123	0.572	0.692	3.4337e-08	0.01		1	1	0	2018	2018
Triple-Negative Breast Carcinoma	C4722518	SLC2A3	6515	P11169	solute carrier family 2 member 3	Transporter	144	0.534	0.769	0.010333	0.01		1	1	0	2019	2019
Triple-Negative Breast Carcinoma	C4722518	SLC2A5	6518	P22732	solute carrier family 2 member 5	Transporter	48	0.647	0.5	3.5691e-10	0.01		1	1	0	2019	2019
Triple-Negative Breast Carcinoma	C4722518	SLC4A7	9497	Q9Y6M7	solute carrier family 4 member 7	Transporter	34	0.716	0.423	0.73616	0.01		1	1	0	2018	2018
Triple-Negative Breast Carcinoma	C4722518	SLC52A1	55065	Q9NWF4	solute carrier family 52 member 1	Transporter	160	0.526	0.769	3.5163e-06	0.01		1	1	0	2018	2018
Triple-Negative Breast Carcinoma	C4722518	SLC5A1	6523	P13866	solute carrier family 5 member 1	Transporter	94	0.584	0.654	8.747e-08	0.01		1	1	0	2019	2019
Triple-Negative Breast Carcinoma	C4722518	SLC6A3	6531	Q01959	solute carrier family 6 member 3	Transporter	373	0.453	0.885	0.99758	0.01		1	1	0	2018	2018
Triple-Negative Breast Carcinoma	C4722518	SLC7A11	23657	Q9UPY5	solute carrier family 7 member 11	Transporter	72	0.603	0.692	5.6817e-05	0.02		1	2	0	2015	2019
Triple-Negative Breast Carcinoma	C4722518	SLC9A1	6548	P19634	solute carrier family 9 member A1	Transporter	144	0.55	0.731	0.79049	0.06		1	6	0	2015	2018
Triple-Negative Breast Carcinoma	C4722518	SLC9A3R1	9368	O14745	SLC9A3 regulator 1		116	0.547	0.577	8.8416e-05	0.02		1	2	0	2015	2017
Triple-Negative Breast Carcinoma	C4722518	SLCO6A1	133482	Q86UG4	solute carrier organic anion transporter family member 6A1	Transporter	449	0.412	0.885	2.8807e-11	0.01		1	1	0	2019	2019
Triple-Negative Breast Carcinoma	C4722518	SLFN12	55106	Q8IYM2	schlafen family member 12		14	0.792	0.269	4.6915e-07	0.01		1	1	0	2019	2019
Triple-Negative Breast Carcinoma	C4722518	SLN	6588	O00631	sarcolipin		69	0.612	0.5	0.28701	0.01		1	1	0	2018	2018
Triple-Negative Breast Carcinoma	C4722518	SLPI	6590	P03973	secretory leukocyte peptidase inhibitor	Enzyme modulator	310	0.449	0.846	0.00089665	0.01		1	1	0	2017	2017
Triple-Negative Breast Carcinoma	C4722518	SMAD2	4087	Q15796	SMAD family member 2	Transcription factor	289	0.456	0.808	0.99661	0.03		1	3	0	2013	2018
Triple-Negative Breast Carcinoma	C4722518	SMAD3	4088	P84022	SMAD family member 3	Transcription factor	470	0.415	0.923	0.79796	0.04		1	4	0	2017	2018
Triple-Negative Breast Carcinoma	C4722518	SMAD4	4089	Q13485	SMAD family member 4	Transcription factor	575	0.401	0.808	0.99881	0.01		1	1	0	2018	2018
Triple-Negative Breast Carcinoma	C4722518	SMAD7	4092	O15105	SMAD family member 7	Transcription factor	269	0.47	0.769	0.54854	0.02		1	2	0	2017	2019
Triple-Negative Breast Carcinoma	C4722518	SMARCA1	6594	P28370	SWI/SNF related, matrix associated, actin dependent regulator of chromatin, subfamily a, member 1	Enzyme	183	0.504	0.808	1	0.01		1	1	0	2015	2015
Triple-Negative Breast Carcinoma	C4722518	SMARCA4	6597	P51532	SWI/SNF related, matrix associated, actin dependent regulator of chromatin, subfamily a, member 4	Epigenetic regulator	347	0.45	0.885	1	0.02		1	2	0	2016	2016
Triple-Negative Breast Carcinoma	C4722518	SMARCD3	6604	Q6STE5	SWI/SNF related, matrix associated, actin dependent regulator of chromatin, subfamily d, member 3	Nucleic acid binding	9	0.821	0.269	0.40464	0.01		1	1	0	2013	2013
Triple-Negative Breast Carcinoma	C4722518	SMC1A	8243	Q14683	structural maintenance of chromosomes 1A		251	0.509	0.808	1	0.02		1	2	0	2013	2016
Triple-Negative Breast Carcinoma	C4722518	SMG1	23049	Q96Q15	SMG1 nonsense mediated mRNA decay associated PI3K related kinase	Kinase	90	0.575	0.808	1	0.01		1	1	0	2018	2018
Triple-Negative Breast Carcinoma	C4722518	SMN1	6606	Q16637	survival of motor neuron 1, telomeric	Epigenetic regulator	317	0.454	0.769	0.015829	0.02		1	2	0	2018	2018
Triple-Negative Breast Carcinoma	C4722518	SMN2	6607	Q16637	survival of motor neuron 2, centromeric		299	0.459	0.769	0.10337	0.02		1	2	0	2018	2018
Triple-Negative Breast Carcinoma	C4722518	SMR3B	10879	P02814	submaxillary gland androgen regulated protein 3B		74	0.601	0.654	0.38712	0.01		1	1	0	2016	2016
Triple-Negative Breast Carcinoma	C4722518	SMS	6611	P52788	spermine synthase		263	0.491	0.846	0.97297	0.01		1	1	0	2019	2019
Triple-Negative Breast Carcinoma	C4722518	SMUG1	23583	Q53HV7	single-strand-selective monofunctional uracil-DNA glycosylase 1		1034	0.322	0.923	0.00045154	0.05		1	5	0	2018	2019
Triple-Negative Breast Carcinoma	C4722518	SMURF2	64750	Q9HAU4	SMAD specific E3 ubiquitin protein ligase 2	Enzyme	59	0.623	0.615	0.87235	0.01		1	1	0	2014	2014
Triple-Negative Breast Carcinoma	C4722518	SMYD2	56950	Q9NRG4	SET and MYND domain containing 2	Epigenetic regulator	54	0.628	0.538	2.4631e-06	0.01		1	1	0	2018	2018
Triple-Negative Breast Carcinoma	C4722518	SNAI1	6615	O95863	snail family transcriptional repressor 1		243	0.474	0.808	0.21754	0.02		1	2	0	2018	2019
Triple-Negative Breast Carcinoma	C4722518	SNAI2	6591	O43623	snail family transcriptional repressor 2		189	0.505	0.692	0.79531	0.02		1	2	0	2016	2018
Triple-Negative Breast Carcinoma	C4722518	SNCA	6622	P37840	synuclein alpha	Transporter	449	0.427	0.885	0.8829	0.01		1	1	0	2018	2018
Triple-Negative Breast Carcinoma	C4722518	SNCG	6623	O76070	synuclein gamma	Transporter	122	0.55	0.615	0.0008475	0.01		1	1	0	2013	2013
Triple-Negative Breast Carcinoma	C4722518	SNHG12	85028	Q9BXW3	small nucleolar RNA host gene 12		50	0.628	0.538		0.01		1	1	0	2017	2017
Triple-Negative Breast Carcinoma	C4722518	SOAT1	6646	P35610	sterol O-acyltransferase 1	Enzyme	389	0.424	0.846	7.3621e-10	0.02		1	2	0	2018	2019
Triple-Negative Breast Carcinoma	C4722518	SOCS1	8651	O15524	suppressor of cytokine signaling 1	Enzyme modulator	315	0.445	0.808	0.58544	0.03		1	3	0	2018	2019
Triple-Negative Breast Carcinoma	C4722518	SOCS3	9021	O14543	suppressor of cytokine signaling 3	Enzyme modulator	375	0.434	0.808	0.74613	0.02		1	2	0	2015	2018
Triple-Negative Breast Carcinoma	C4722518	SOD2	6648	P04179	superoxide dismutase 2	Enzyme	668	0.379	0.923	0.15499	0.01		1	1	0	2018	2018
Triple-Negative Breast Carcinoma	C4722518	SOD3	6649	P08294	superoxide dismutase 3	Enzyme	138	0.531	0.808	0.00072272	0.01		1	1	0	2019	2019
Triple-Negative Breast Carcinoma	C4722518	SOX10	6663	P56693	SRY-box transcription factor 10		334	0.461	0.808	0.99166	0.07		1	7	0	2017	2019
Triple-Negative Breast Carcinoma	C4722518	SOX2	6657	P48431	SRY-box transcription factor 2	Transcription factor	503	0.405	0.808	0.70662	0.06		1	6	0	2018	2019
Triple-Negative Breast Carcinoma	C4722518	SOX2-SRR2	108281178		SRR2 enhancer downstream of SOX2		7	0.861	0.077		0.02		1	2	0	2015	2017
Triple-Negative Breast Carcinoma	C4722518	SOX4	6659	Q06945	SRY-box transcription factor 4	Transcription factor	246	0.489	0.808	0.92656	0.03		1	3	0	2012	2018
Triple-Negative Breast Carcinoma	C4722518	SOX5	6660	P35711	SRY-box transcription factor 5		150	0.545	0.769	0.99995	0.01		1	1	0	2018	2018
Triple-Negative Breast Carcinoma	C4722518	SOX8	30812	P57073	SRY-box transcription factor 8		34	0.674	0.692	0.67167	0.01		1	1	0	2019	2019
Triple-Negative Breast Carcinoma	C4722518	SPA17	53340	Q15506	sperm autoantigenic protein 17		48	0.647	0.577	0.0066161	0.01		1	1	0	2017	2017
Triple-Negative Breast Carcinoma	C4722518	SPAG5	10615	Q96R06	sperm associated antigen 5		38	0.674	0.385	1.3955e-15	0.02		1	2	0	2013	2019
Triple-Negative Breast Carcinoma	C4722518	SPAG9	9043	O60271	sperm associated antigen 9	Enzyme modulator	98	0.566	0.769	1	0.02		1	2	0	2013	2016
Triple-Negative Breast Carcinoma	C4722518	SPANXB1	728695	Q9NS25	SPANX family member B1		14	0.76	0.192		0.01		1	1	0	2019	2019
Triple-Negative Breast Carcinoma	C4722518	SPARC	6678	P09486	secreted protein acidic and cysteine rich	Signaling	344	0.445	0.846	0.89148	0.01		1	1	0	2016	2016
Triple-Negative Breast Carcinoma	C4722518	SPATA2	9825	Q9UM82	spermatogenesis associated 2		107	0.556	0.615	0.97889	0.01		1	1	0	2018	2018
Triple-Negative Breast Carcinoma	C4722518	SPDYA	245711	Q5MJ70	speedy/RINGO cell cycle regulator family member A		31	0.695	0.462	0.551	0.01		1	1	0	2018	2018
Triple-Negative Breast Carcinoma	C4722518	SPG7	6687	Q9UQ90	SPG7 matrix AAA peptidase subunit, paraplegin	Enzyme	419	0.436	0.885	1.9683e-36	0.03		1	3	0	2018	2019
Triple-Negative Breast Carcinoma	C4722518	SPHK1	8877	Q9NYA1	sphingosine kinase 1	Kinase	236	0.48	0.808	3.0327e-07	0.05		1	5	0	2014	2019
Triple-Negative Breast Carcinoma	C4722518	SPIN1	10927	Q9Y657	spindlin 1		39	0.666	0.385	0.97049	0.01		1	1	0	2017	2017
Triple-Negative Breast Carcinoma	C4722518	SPOP	8405	O43791	speckle type BTB/POZ protein		72	0.597	0.5	0.99922	0.01		1	1	0	2018	2018
Triple-Negative Breast Carcinoma	C4722518	SPP1	6696	P10451	secreted phosphoprotein 1		824	0.353	0.885	2.146e-06	0.01		1	1	0	2018	2018
Triple-Negative Breast Carcinoma	C4722518	SPPL3	121665	Q8TCT6	signal peptide peptidase like 3	Enzyme	50	0.638	0.615	0.99656	0.01		1	1	0	2018	2018
Triple-Negative Breast Carcinoma	C4722518	SPRY1	10252	O43609	sprouty RTK signaling antagonist 1	Signaling	63	0.603	0.577	0.0030398	0.01		1	1	0	2016	2016
Triple-Negative Breast Carcinoma	C4722518	SPZ1	84654	Q9BXG8	spermatogenic leucine zipper 1		173	0.507	0.769		0.01		1	1	0	2015	2015
Triple-Negative Breast Carcinoma	C4722518	SQSTM1	8878	Q13501	sequestosome 1		470	0.428	0.885	0.00086035	0.01		1	1	0	2012	2012
Triple-Negative Breast Carcinoma	C4722518	SRC	6714	P12931	SRC proto-oncogene, non-receptor tyrosine kinase	Kinase	265	0.467	0.885	0.99691	0.02		1	2	0	2015	2016
Triple-Negative Breast Carcinoma	C4722518	SRD5A1	6715	P18405	steroid 5 alpha-reductase 1	Enzyme	48	0.631	0.538	1.1557e-05	0.01		1	1	0	2015	2015
Triple-Negative Breast Carcinoma	C4722518	SRGN	5552	P10124	serglycin		84	0.588	0.731	0.69656	0.01		1	1	0	2017	2017
Triple-Negative Breast Carcinoma	C4722518	SRL	6345	Q86TD4	sarcalumenin	Enzyme modulator	77	0.597	0.731	8.0004e-08	0.01		1	1	0	2019	2019
Triple-Negative Breast Carcinoma	C4722518	SRSF2	6427	Q01130	serine and arginine rich splicing factor 2	Nucleic acid binding	102	0.561	0.731	0.47898	0.01		1	1	0	2019	2019
Triple-Negative Breast Carcinoma	C4722518	SRSF3	6428	P84103	serine and arginine rich splicing factor 3	Nucleic acid binding	60	0.619	0.615	0.96323	0.03		1	3	0	2018	2019
Triple-Negative Breast Carcinoma	C4722518	SSAV1	6739		simian sarcoma-associated virus 1/gibbon ape leukemia virus-related endogenous retroviral element 1		27	0.695	0.269		0.02		1	2	0	2013	2014
Triple-Negative Breast Carcinoma	C4722518	SSBP1	6742	Q04837	single stranded DNA binding protein 1	Nucleic acid binding	35	0.678	0.385	0.0036396	0.01		1	1	0	2016	2016
Triple-Negative Breast Carcinoma	C4722518	SST	6750	P61278	somatostatin	Signaling	535	0.399	0.885	0.34128	0.01		1	1	0	2018	2018
Triple-Negative Breast Carcinoma	C4722518	SSTR4	6754	P31391	somatostatin receptor 4	G-protein coupled receptor	273	0.469	0.846	3.6978e-13	0.01		1	1	0	2014	2014
Triple-Negative Breast Carcinoma	C4722518	ST14	6768	Q9Y5Y6	suppression of tumorigenicity 14	Enzyme	170	0.514	0.769	0.56042	0.01		1	1	0	2018	2018
Triple-Negative Breast Carcinoma	C4722518	ST3GAL6	10402	Q9Y274	ST3 beta-galactoside alpha-2,3-sialyltransferase 6		12	0.821	0.231	2.3272e-08	0.01		1	1	0	2018	2018
Triple-Negative Breast Carcinoma	C4722518	ST6GAL1	6480	P15907	ST6 beta-galactoside alpha-2,6-sialyltransferase 1		101	0.569	0.731	0.2341	0.01		1	1	0	2019	2019
Triple-Negative Breast Carcinoma	C4722518	ST8SIA1	6489	Q92185	ST8 alpha-N-acetyl-neuraminide alpha-2,8-sialyltransferase 1		40	0.678	0.5	0.493	0.01		1	1	0	2018	2018
Triple-Negative Breast Carcinoma	C4722518	STAR	6770	P49675	steroidogenic acute regulatory protein		177	0.513	0.808	8.7679e-11	0.01		1	1	0	2019	2019
Triple-Negative Breast Carcinoma	C4722518	STAT1	6772	P42224	signal transducer and activator of transcription 1	Nucleic acid binding	531	0.399	0.885	0.99999	0.05		1	5	0	2013	2018
Triple-Negative Breast Carcinoma	C4722518	STAT3	6774	P40763	signal transducer and activator of transcription 3	Nucleic acid binding	1193	0.32	0.923	1	0.1		1	39	0	2011	2020
Triple-Negative Breast Carcinoma	C4722518	STING1	340061	Q86WV6	stimulator of interferon response cGAMP interactor 1		159	0.522	0.769	0.0012067	0.01		1	1	0	2019	2019
Triple-Negative Breast Carcinoma	C4722518	STMN1	3925	P16949	stathmin 1		284	0.458	0.885	0.075244	0.01		1	1	0	2018	2018
Triple-Negative Breast Carcinoma	C4722518	SULT1A1	6817	P50225	sulfotransferase family 1A member 1		122	0.554	0.769	3.039e-11	0.01		1	1	0	2014	2014
Triple-Negative Breast Carcinoma	C4722518	SUV39H1	6839	O43463	suppressor of variegation 3-9 homolog 1		77	0.595	0.577	0.98957	0.01		1	1	0	2016	2016
Triple-Negative Breast Carcinoma	C4722518	SYK	6850	P43405	spleen associated tyrosine kinase	Kinase	229	0.475	0.808	0.99986	0.02		1	2	0	2015	2019
Triple-Negative Breast Carcinoma	C4722518	SYNPO2	171024	Q9UMS6	synaptopodin 2	Cellular structure	19	0.743	0.269	8.5623e-08	0.01		1	1	0	2018	2018
Triple-Negative Breast Carcinoma	C4722518	SYT1	6857	P21579	synaptotagmin 1	Transporter	460	0.412	0.846	0.60038	0.03		1	3	0	2016	2019
Triple-Negative Breast Carcinoma	C4722518	TAB1	10454	Q15750	TGF-beta activated kinase 1 (MAP3K7) binding protein 1	Kinase	23	0.722	0.423	3.2186e-07	0.01		1	1	0	2019	2019
Triple-Negative Breast Carcinoma	C4722518	TAC1	6863	P20366	tachykinin precursor 1		478	0.424	0.923	0.74608	0.02		1	2	0	2015	2016
Triple-Negative Breast Carcinoma	C4722518	TACC3	10460	Q9Y6A5	transforming acidic coiled-coil containing protein 3		62	0.615	0.615	2.7082e-07	0.01		1	1	0	2016	2016
Triple-Negative Breast Carcinoma	C4722518	TACR1	6869	P25103	tachykinin receptor 1	G-protein coupled receptor	217	0.502	0.885	0.00038437	0.01		1	1	0	2016	2016
Triple-Negative Breast Carcinoma	C4722518	TACSTD2	4070	P09758	tumor associated calcium signal transducer 2		130	0.537	0.731	0.0046571	0.03		1	3	0	2017	2019
Triple-Negative Breast Carcinoma	C4722518	TAM	8205		Myeloproliferative syndrome, transient (transient abnormal		141	0.528	0.731		0.02		1	2	0	2015	2019
Triple-Negative Breast Carcinoma	C4722518	TARBP2	6895	Q15633	TARBP2 subunit of RISC loading complex		49	0.65	0.5	0.46644	0.01		1	1	0	2014	2014
Triple-Negative Breast Carcinoma	C4722518	TARDBP	23435	Q13148	TAR DNA binding protein		245	0.493	0.808	0.98542	0.02		1	2	0	2018	2019
Triple-Negative Breast Carcinoma	C4722518	TAZ	6901	Q16635	tafazzin	Enzyme	252	0.477	0.808	0.72591	0.01		1	1	0	2016	2016
Triple-Negative Breast Carcinoma	C4722518	TBC1D9	23158	Q6ZT07	TBC1 domain family member 9	Enzyme	491	0.399	0.846	2.8039e-05	0.01		1	1	0	2020	2020
Triple-Negative Breast Carcinoma	C4722518	TBCE	6905	Q15813	tubulin folding cofactor E	Chaperone	146	0.575	0.692	1.7455e-08	0.01		1	1	0	2015	2015
Triple-Negative Breast Carcinoma	C4722518	TBK1	29110	Q9UHD2	TANK binding kinase 1	Kinase	207	0.513	0.846	0.075174	0.02		1	2	0	2019	2020
Triple-Negative Breast Carcinoma	C4722518	TBX1	6899	O43435	T-box transcription factor 1	Transcription factor	417	0.433	0.808	0.83661	0.03		1	3	0	2016	2018
Triple-Negative Breast Carcinoma	C4722518	TBX21	30009	Q9UL17	T-box transcription factor 21	Transcription factor	124	0.541	0.808	0.99636	0.01		1	1	0	2019	2019
Triple-Negative Breast Carcinoma	C4722518	TCF3	6929	P15923	transcription factor 3	Transcription factor	244	0.476	0.846	0.025824	0.01		1	1	0	2019	2019
Triple-Negative Breast Carcinoma	C4722518	TDO2	6999	P48775	tryptophan 2,3-dioxygenase	Enzyme	89	0.599	0.654	2.0378e-10	0.03		1	3	0	2015	2019
Triple-Negative Breast Carcinoma	C4722518	TEAD1	7003	P28347	TEA domain transcription factor 1	Transcription factor	116	0.555	0.731	0.9998	0.02		1	2	0	2015	2018
Triple-Negative Breast Carcinoma	C4722518	TET1	80312	Q8NFU7	tet methylcytosine dioxygenase 1		156	0.523	0.808	1	0.02		1	2	0	2018	2019
Triple-Negative Breast Carcinoma	C4722518	TEX9	374618	Q8N6V9	testis expressed 9		13	0.839	0.154	6.4247e-22	0.01		1	1	0	2017	2017
Triple-Negative Breast Carcinoma	C4722518	TF	7018	P02787	transferrin	Enzyme	168	0.527	0.846	4.1001e-08	0.01		1	1	0	2018	2018
Triple-Negative Breast Carcinoma	C4722518	TFCP2L1	29842	Q9NZI6	transcription factor CP2 like 1	Transcription factor	26	0.751	0.346	0.99996	0.01		1	1	0	2019	2019
Triple-Negative Breast Carcinoma	C4722518	TFEB	7942	P19484	transcription factor EB		150	0.527	0.731	0.89931	0.01		1	1	0	2020	2020
Triple-Negative Breast Carcinoma	C4722518	TFPI2	7980	P48307	tissue factor pathway inhibitor 2	Enzyme modulator	161	0.521	0.769	0.00084274	0.02		1	2	0	2015	2018
Triple-Negative Breast Carcinoma	C4722518	TFRC	7037	P02786	transferrin receptor	Enzyme	359	0.437	0.885	6.9902e-05	0.03		1	3	0	2018	2019
Triple-Negative Breast Carcinoma	C4722518	TGFA	7039	P01135	transforming growth factor alpha	Signaling	376	0.432	0.885	0.71981	0.02		1	2	0	2013	2018
Triple-Negative Breast Carcinoma	C4722518	TGFB1	7040	P01137	transforming growth factor beta 1	Signaling	1558	0.287	0.962	0.03685	0.1		1	11	0	2015	2019
Triple-Negative Breast Carcinoma	C4722518	TGFB2	7042	P61812	transforming growth factor beta 2	Signaling	389	0.433	0.885	0.99905	0.01		1	1	0	2017	2017
Triple-Negative Breast Carcinoma	C4722518	TGFBR3	7049	Q03167	transforming growth factor beta receptor 3		117	0.55	0.808	0.0030577	0.01		1	1	0	2014	2014
Triple-Negative Breast Carcinoma	C4722518	THBS1	7057	P07996	thrombospondin 1		480	0.407	0.885	0.99985	0.01		1	1	0	2015	2015
Triple-Negative Breast Carcinoma	C4722518	THBS2	7058	P35442	thrombospondin 2		149	0.526	0.769	0.55641	0.01		1	1	0	2019	2019
Triple-Negative Breast Carcinoma	C4722518	THRB	7068	P10828	thyroid hormone receptor beta	Nuclear receptor	142	0.554	0.769	0.99676	0.01		1	1	0	2015	2015
Triple-Negative Breast Carcinoma	C4722518	THY1	7070	P04216	Thy-1 cell surface antigen		197	0.496	0.808	0.049895	0.01		1	1	0	2017	2017
Triple-Negative Breast Carcinoma	C4722518	TICAM2	353376	Q86XR7;Q9Y3B3	toll like receptor adaptor molecule 2		332	0.438	0.769	0.0025936	0.04		1	4	0	2014	2019
Triple-Negative Breast Carcinoma	C4722518	TIMM8A	1678	O60220	translocase of inner mitochondrial membrane 8A		200	0.51	0.846	0.65195	0.01		1	1	0	2017	2017
Triple-Negative Breast Carcinoma	C4722518	TIMP1	7076	P01033	TIMP metallopeptidase inhibitor 1	Enzyme modulator	603	0.38	0.885	0.4993	0.01		1	1	0	2016	2016
Triple-Negative Breast Carcinoma	C4722518	TIMP2	7077	P16035	TIMP metallopeptidase inhibitor 2	Enzyme modulator	404	0.425	0.846	0.78893	0.01		1	1	0	2019	2019
Triple-Negative Breast Carcinoma	C4722518	TINAGL1	64129	Q9GZM7	tubulointerstitial nephritis antigen like 1	Enzyme	38	0.659	0.538	0.00032933	0.01		1	1	0	2019	2019
Triple-Negative Breast Carcinoma	C4722518	TIPIN	54962	Q9BVW5	TIMELESS interacting protein	Transcription factor	9	0.792	0.269	0.00016045	0.01		1	1	0	2015	2015
Triple-Negative Breast Carcinoma	C4722518	TKT	7086	P29401	transketolase	Enzyme	92	0.595	0.769	0.006748	0.01		1	1	0	2018	2018
Triple-Negative Breast Carcinoma	C4722518	TLE3	7090	Q04726	TLE family member 3, transcriptional corepressor	Transcription factor	38	0.674	0.462	1	0.02		1	2	0	2017	2019
Triple-Negative Breast Carcinoma	C4722518	TLN1	7094	Q9Y490	talin 1		48	0.641	0.615	1	0.01		1	1	0	2013	2013
Triple-Negative Breast Carcinoma	C4722518	TLR1	7096	Q15399	toll like receptor 1		198	0.496	0.808	5.8704e-23	0.01		1	1	0	2017	2017
Triple-Negative Breast Carcinoma	C4722518	TLR5	7100	O60602	toll like receptor 5		163	0.518	0.885	2.4773e-13	0.01		1	1	0	2019	2019
Triple-Negative Breast Carcinoma	C4722518	TLR9	54106	Q9NR96	toll like receptor 9		457	0.411	0.885	9.8117e-06	0.02		1	2	0	2012	2017
Triple-Negative Breast Carcinoma	C4722518	TM4SF1	4071	P30408	transmembrane 4 L six family member 1		48	0.644	0.462	0.0015619	0.02		1	2	0	2017	2019
Triple-Negative Breast Carcinoma	C4722518	TMED7	51014	Q86XR7;Q9Y3B3	transmembrane p24 trafficking protein 7	Transporter	336	0.436	0.808	0.47966	0.04		1	4	0	2014	2019
Triple-Negative Breast Carcinoma	C4722518	TMED7-TICAM2	100302736	Q86XR7;Q9Y3B3	TMED7-TICAM2 readthrough		329	0.438	0.769	0.0025936	0.04		1	4	0	2014	2019
Triple-Negative Breast Carcinoma	C4722518	TMEM17	200728	Q86X19	transmembrane protein 17		18	0.743	0.231	0.0094291	0.01		1	1	0	2018	2018
Triple-Negative Breast Carcinoma	C4722518	TMEM88	92162	Q6PEY1	transmembrane protein 88		19	0.751	0.231	0.27743	0.01		1	1	0	2015	2015
Triple-Negative Breast Carcinoma	C4722518	TMPRSS6	164656	Q8IU80	transmembrane serine protease 6	Enzyme	113	0.584	0.654	4.1369e-10	0.01		1	1	0	2013	2013
Triple-Negative Breast Carcinoma	C4722518	TMSB15A	11013	P0CG34;P0CG35	thymosin beta 15a		15	0.76	0.231	0.39053	0.01		1	1	0	2012	2012
Triple-Negative Breast Carcinoma	C4722518	TMSB15B	286527	P0CG34;P0CG35	thymosin beta 15B		14	0.743	0.269	0.38882	0.01		1	1	0	2012	2012
Triple-Negative Breast Carcinoma	C4722518	TMX2-CTNND1	100528016		TMX2-CTNND1 readthrough (NMD candidate)		138	0.538	0.769		0.01		1	1	0	2017	2017
Triple-Negative Breast Carcinoma	C4722518	TNF	7124	P01375	tumor necrosis factor	Signaling	2724	0.231	0.962	0.8033	0.1		1	18	0	2012	2020
Triple-Negative Breast Carcinoma	C4722518	TNFAIP3	7128	P21580	TNF alpha induced protein 3	Enzyme	212	0.481	0.808	0.99972	0.01		1	1	0	2019	2019
Triple-Negative Breast Carcinoma	C4722518	TNFRSF10B	8795	O14763	TNF receptor superfamily member 10b		179	0.505	0.769	0.00019928	0.04		0.75	4	0	2012	2019
Triple-Negative Breast Carcinoma	C4722518	TNFRSF11B	4982	O00300	TNF receptor superfamily member 11b		443	0.422	0.808	0.16171	0.02		1	2	0	2014	2019
Triple-Negative Breast Carcinoma	C4722518	TNFRSF12A	51330	Q9NP84	TNF receptor superfamily member 12A		173	0.509	0.692	0.017995	0.01		1	1	0	2014	2014
Triple-Negative Breast Carcinoma	C4722518	TNFRSF13B	23495	O14836	TNF receptor superfamily member 13B		137	0.558	0.769	2.0908e-15	0.01		1	1	0	2020	2020
Triple-Negative Breast Carcinoma	C4722518	TNFRSF1A	7132	P19438	TNF receptor superfamily member 1A		487	0.409	0.923	0.9949	0.01		1	1	0	2019	2019
Triple-Negative Breast Carcinoma	C4722518	TNFRSF1B	7133	P20333	TNF receptor superfamily member 1B		417	0.425	0.885	0.50201	0.01		1	1	0	2019	2019
Triple-Negative Breast Carcinoma	C4722518	TNFRSF9	3604	Q07011	TNF receptor superfamily member 9		177	0.502	0.769	0.32153	0.01		1	1	0	2017	2017
Triple-Negative Breast Carcinoma	C4722518	TNFSF10	8743	P50591	TNF superfamily member 10	Signaling	445	0.413	0.885	0.13495	0.09		1	9	0	2011	2019
Triple-Negative Breast Carcinoma	C4722518	TNFSF12	8742	O43508	TNF superfamily member 12		123	0.556	0.769	0.76997	0.01		1	1	0	2014	2014
Triple-Negative Breast Carcinoma	C4722518	TNFSF12-TNFSF13	407977	O43508	TNFSF12-TNFSF13 readthrough		91	0.579	0.615	0.76997	0.01		1	1	0	2014	2014
Triple-Negative Breast Carcinoma	C4722518	TNIK	23043	Q9UKE5	TRAF2 and NCK interacting kinase	Kinase	83	0.612	0.615	1	0.01		1	1	0	2018	2018
Triple-Negative Breast Carcinoma	C4722518	TNK2	10188	Q07912	tyrosine kinase non receptor 2	Kinase	59	0.623	0.538	8.22e-12	0.01		1	1	0	2017	2017
Triple-Negative Breast Carcinoma	C4722518	TNKS	8658	O95271	tankyrase		88	0.576	0.692	0.011406	0.01		1	1	0	2018	2018
Triple-Negative Breast Carcinoma	C4722518	TNKS2	80351	Q9H2K2	tankyrase 2		25	0.695	0.385	3.6661e-05	0.01		1	1	0	2016	2016
Triple-Negative Breast Carcinoma	C4722518	TNMD	64102	Q9H2S6	tenomodulin		86	0.588	0.692	0.0035119	0.01		1	1	0	2017	2017
Triple-Negative Breast Carcinoma	C4722518	TNNT1	7138	P13805	troponin T1, slow skeletal type	Cellular structure	60	0.633	0.577	7.0202e-14	0.02		1	2	0	2015	2018
Triple-Negative Breast Carcinoma	C4722518	TNS3	64759	Q68CZ2	tensin 3		50	0.653	0.615	1	0.01		1	1	0	2019	2019
Triple-Negative Breast Carcinoma	C4722518	TOP2A	7153	P11388	DNA topoisomerase II alpha		200	0.497	0.731	0.99086	0.01		1	1	0	2015	2015
Triple-Negative Breast Carcinoma	C4722518	TOX3	27324	O15405	TOX high mobility group box family member 3		49	0.636	0.538	0.9995	0.01		1	1	0	2011	2011
Triple-Negative Breast Carcinoma	C4722518	TP53	7157	P04637	tumor protein p53	Transcription factor	2494	0.236	0.962	0.53235	0.1		0.962	79	3	2009	2020
Triple-Negative Breast Carcinoma	C4722518	TP53BP1	7158	Q12888	tumor protein p53 binding protein 1	Epigenetic regulator	158	0.52	0.731	0.99985	0.03		1	3	0	2016	2017
Triple-Negative Breast Carcinoma	C4722518	TP53TG1	11257		TP53 target 1		16	0.792	0.269		0.01		1	1	0	2019	2019
Triple-Negative Breast Carcinoma	C4722518	TP63	8626	Q9H3D4	tumor protein p63	Transcription factor	816	0.362	0.769	0.99728	0.02		1	2	0	2011	2012
Triple-Negative Breast Carcinoma	C4722518	TP73	7161	O15350	tumor protein p73	Transcription factor	300	0.449	0.808	0.99696	0.02		1	2	0	2012	2013
Triple-Negative Breast Carcinoma	C4722518	TP73-AS1	57212		TP73 antisense RNA 1		65	0.599	0.577		0.01		1	1	0	2018	2018
Triple-Negative Breast Carcinoma	C4722518	TPH1	7166	P17752	tryptophan hydroxylase 1		127	0.553	0.731	3.1872e-07	0.02		1	2	0	2016	2017
Triple-Negative Breast Carcinoma	C4722518	TPX2	22974	Q9ULW0	TPX2 microtubule nucleation factor	Cellular structure	122	0.541	0.692	0.99981	0.02		1	2	0	2019	2019
Triple-Negative Breast Carcinoma	C4722518	TRA	6955	P0DSE1	T cell receptor alpha locus		51	0.628	0.577		0.01		1	1	0	2018	2018
Triple-Negative Breast Carcinoma	C4722518	TRA2A	29896	Q13595	transformer 2 alpha homolog	Nucleic acid binding	17	0.751	0.269	0.0095214	0.01		1	1	0	2017	2017
Triple-Negative Breast Carcinoma	C4722518	TRIB3	57761	Q96RU7	tribbles pseudokinase 3	Kinase	104	0.573	0.692	1.1597e-13	0.01		1	1	0	2019	2019
Triple-Negative Breast Carcinoma	C4722518	TRIM13	10206	O60858	tripartite motif containing 13		275	0.462	0.846	0.6366	0.03		1	3	0	2018	2019
Triple-Negative Breast Carcinoma	C4722518	TRIM29	23650	Q14134	tripartite motif containing 29		70	0.606	0.654	8.1158e-08	0.01		0	1	0	2017	2017
Triple-Negative Breast Carcinoma	C4722518	TRIM59	286827	Q8IWR1	tripartite motif containing 59		74	0.599	0.577	0.0014575	0.01		1	1	0	2018	2018
Triple-Negative Breast Carcinoma	C4722518	TRIML2	205860	Q8N7C3	tripartite motif family like 2		11	0.839	0.192	1.154e-05	0.01		1	1	0	2019	2019
Triple-Negative Breast Carcinoma	C4722518	TRIP10	9322	Q15642	thyroid hormone receptor interactor 10		46	0.65	0.654	1.6667e-05	0.03		1	3	0	2014	2019
Triple-Negative Breast Carcinoma	C4722518	TRPC3	7222	Q13507	transient receptor potential cation channel subfamily C member 3	Ion channel	102	0.57	0.731	1.0806e-07	0.01		1	1	0	2019	2019
Triple-Negative Breast Carcinoma	C4722518	TRPV2	51393	Q9Y5S1	transient receptor potential cation channel subfamily V member 2	Ion channel	90	0.581	0.615	7.9184e-13	0.02		1	2	0	2018	2020
Triple-Negative Breast Carcinoma	C4722518	TSPO	706	P30536	translocator protein		341	0.444	0.885	0.00027398	0.01		1	1	0	2018	2018
Triple-Negative Breast Carcinoma	C4722518	TTF1	7270	Q15361	transcription termination factor 1		134	0.537	0.5	6.2102e-13	0.01		1	1	0	2019	2019
Triple-Negative Breast Carcinoma	C4722518	TTK	7272	P33981	TTK protein kinase	Kinase	112	0.555	0.731	0.0012734	0.09		1	9	0	2013	2019
Triple-Negative Breast Carcinoma	C4722518	TUFT1	7286	Q9NNX1	tuftelin 1		28	0.682	0.385	0.00010612	0.02		1	2	0	2019	2019
Triple-Negative Breast Carcinoma	C4722518	TUG1	55000		taurine up-regulated 1		134	0.522	0.769		0.01		1	1	0	2018	2018
Triple-Negative Breast Carcinoma	C4722518	TUSC2	11334	O75896	tumor suppressor 2, mitochondrial calcium regulator		111	0.556	0.846	0.7671	0.01		1	1	0	2019	2019
Triple-Negative Breast Carcinoma	C4722518	TWIST1	7291	Q15672	twist family bHLH transcription factor 1	Transcription factor	559	0.397	0.846	0.34491	0.06		0.833	6	0	2014	2019
Triple-Negative Breast Carcinoma	C4722518	TXN	7295	P10599	thioredoxin		338	0.447	0.885	0.20119	0.02		1	2	0	2018	2020
Triple-Negative Breast Carcinoma	C4722518	TXNIP	10628	Q9H3M7	thioredoxin interacting protein		208	0.49	0.731	0.15918	0.01		1	1	0	2015	2015
Triple-Negative Breast Carcinoma	C4722518	TXNRD1	7296	Q16881	thioredoxin reductase 1	Enzyme	136	0.529	0.692	1.6062e-06	0.01		1	1	0	2019	2019
Triple-Negative Breast Carcinoma	C4722518	TXNRD2	10587	Q9NNW7	thioredoxin reductase 2	Enzyme	134	0.548	0.731	3.4688e-11	0.01		1	1	0	2015	2015
Triple-Negative Breast Carcinoma	C4722518	TYMS	7298	P04818	thymidylate synthetase	Enzyme	406	0.425	0.846	0.72247	0.01		1	1	0	2019	2019
Triple-Negative Breast Carcinoma	C4722518	UBAP2	55833	Q5T6F2	ubiquitin associated protein 2		21	0.729	0.385	3.4324e-07	0.01		1	1	0	2018	2018
Triple-Negative Breast Carcinoma	C4722518	UBASH3B	84959	Q8TF42	ubiquitin associated and SH3 domain containing B		104	0.561	0.769	4.7054e-05	0.01		1	1	0	2013	2013
Triple-Negative Breast Carcinoma	C4722518	UBE2B	7320	P63146	ubiquitin conjugating enzyme E2 B		59	0.644	0.615	0.19663	0.01		1	1	0	2020	2020
Triple-Negative Breast Carcinoma	C4722518	UBR5	51366	O95071	ubiquitin protein ligase E3 component n-recognin 5		73	0.597	0.654	1	0.01		1	1	0	2017	2017
Triple-Negative Breast Carcinoma	C4722518	UBR7	55148	Q8N806	ubiquitin protein ligase E3 component n-recognin 7		10	0.861	0.231	0.49449	0.01		1	1	0	2019	2019
Triple-Negative Breast Carcinoma	C4722518	UCA1	652995		urothelial cancer associated 1		152	0.512	0.808		0.01		1	1	0	2017	2017
Triple-Negative Breast Carcinoma	C4722518	UCHL3	7347	P15374	ubiquitin C-terminal hydrolase L3	Enzyme	24	0.705	0.385	3.3417e-08	0.01		1	1	0	2019	2019
Triple-Negative Breast Carcinoma	C4722518	UCN	7349	P55089	urocortin	Signaling	134	0.539	0.769	0.44958	0.01		1	1	0	2013	2013
Triple-Negative Breast Carcinoma	C4722518	UIMC1	51720	Q96RL1	ubiquitin interaction motif containing 1		23	0.736	0.346	8.2815e-07	0.01		1	1	0	2016	2016
Triple-Negative Breast Carcinoma	C4722518	ULK1	8408	O75385	unc-51 like autophagy activating kinase 1	Kinase	99	0.564	0.769	0.99318	0.01		1	1	0	2017	2017
Triple-Negative Breast Carcinoma	C4722518	UQCRFS1	7386	P47985	ubiquinol-cytochrome c reductase, Rieske iron-sulfur polypeptide 1		109	0.558	0.654	0.18923	0.02		1	2	0	2016	2016
Triple-Negative Breast Carcinoma	C4722518	USP2	9099	O75604	ubiquitin specific peptidase 2	Enzyme	36	0.682	0.462	0.0006905	0.02		1	2	0	2015	2019
Triple-Negative Breast Carcinoma	C4722518	USP39	10713	Q53GS9	ubiquitin specific peptidase 39	Enzyme	39	0.656	0.385	0.01038	0.01		1	1	0	2015	2015
Triple-Negative Breast Carcinoma	C4722518	UTRN	7402	P46939	utrophin		152	0.525	0.692	1.0021e-19	0.01		1	1	0	2019	2019
Triple-Negative Breast Carcinoma	C4722518	UVRAG	7405	Q9P2Y5	UV radiation resistance associated		336	0.436	0.769	0.98942	0.02		1	2	0	2011	2012
Triple-Negative Breast Carcinoma	C4722518	VASH2	79805	Q86V25	vasohibin 2		45	0.678	0.423	0.24217	0.01		1	1	0	2017	2017
Triple-Negative Breast Carcinoma	C4722518	VCAM1	7412	P19320	vascular cell adhesion molecule 1		406	0.422	0.808	0.79791	0.01		1	1	0	2019	2019
Triple-Negative Breast Carcinoma	C4722518	VDAC1	7416	P21796	voltage dependent anion channel 1		116	0.556	0.654	0.97266	0.02		1	2	0	2018	2019
Triple-Negative Breast Carcinoma	C4722518	VDR	7421	P11473	vitamin D receptor	Nuclear receptor	852	0.352	0.885	1.6787e-05	0.01		1	1	0	2018	2018
Triple-Negative Breast Carcinoma	C4722518	VEGFA	7422	P15692	vascular endothelial growth factor A	Signaling	1899	0.266	0.923	2.4085e-05	0.1		1	24	0	2009	2019
Triple-Negative Breast Carcinoma	C4722518	VEZF1	7716	Q14119	vascular endothelial zinc finger 1		6	0.821	0.115	0.99423	0.01		1	1	0	2018	2018
Triple-Negative Breast Carcinoma	C4722518	VGLL4	9686	Q14135	vestigial like family member 4		33	0.716	0.231	0.072826	0.01		1	1	0	2019	2019
Triple-Negative Breast Carcinoma	C4722518	VHL	7428	P40337	von Hippel-Lindau tumor suppressor	Enzyme	372	0.443	0.846	0.079515	0.01		1	1	0	2019	2019
Triple-Negative Breast Carcinoma	C4722518	VIM	7431	P08670	vimentin		644	0.372	0.846	0.71255	0.1		1	17	0	2013	2020
Triple-Negative Breast Carcinoma	C4722518	VN1R17P	441931	Q8TDU5	vomeronasal 1 receptor 17 pseudogene		167	0.529	0.923		0.01		1	1	0	2014	2014
Triple-Negative Breast Carcinoma	C4722518	VPS51	738	Q9UID3	VPS51 subunit of GARP complex		292	0.452	0.846	1.052e-08	0.01		1	1	0	2013	2013
Triple-Negative Breast Carcinoma	C4722518	VTCN1	79679	Q7Z7D3	V-set domain containing T cell activation inhibitor 1	Enzyme modulator	139	0.529	0.692	1.3669e-12	0.01		1	1	0	2018	2018
Triple-Negative Breast Carcinoma	C4722518	WARS1	7453	P23381	tryptophanyl-tRNA synthetase 1	Enzyme	60	0.65	0.654	0.30288	0.01		1	1	0	2015	2015
Triple-Negative Breast Carcinoma	C4722518	WARS2	10352	Q9UGM6	tryptophanyl tRNA synthetase 2, mitochondrial		110	0.617	0.577	0.050885	0.01		1	1	0	2015	2015
Triple-Negative Breast Carcinoma	C4722518	WASF3	10810	Q9UPY6	WASP family member 3	Cellular structure	83	0.595	0.769	0.54018	0.01		1	1	0	2013	2013
Triple-Negative Breast Carcinoma	C4722518	WBP2	23558	Q969T9	WW domain binding protein 2		23	0.722	0.269	0.34916	0.02		1	2	0	2018	2018
Triple-Negative Breast Carcinoma	C4722518	WEE1	7465	P30291	WEE1 G2 checkpoint kinase	Kinase	116	0.545	0.769	0.99973	0.05		1	5	0	2012	2018
Triple-Negative Breast Carcinoma	C4722518	WIF1	11197	Q9Y5W5	WNT inhibitory factor 1	Calcium-binding protein	171	0.507	0.731	1.3249e-09	0.01		1	1	0	2018	2018
Triple-Negative Breast Carcinoma	C4722518	WNK1	65125	Q9H4A3	WNK lysine deficient protein kinase 1	Kinase	460	0.416	0.846	1	0.03		1	3	0	2016	2019
Triple-Negative Breast Carcinoma	C4722518	WNK2	65268	Q9Y3S1	WNK lysine deficient protein kinase 2	Kinase	35	0.678	0.462	1	0.01		1	1	0	2017	2017
Triple-Negative Breast Carcinoma	C4722518	WNT1	7471	P04628	Wnt family member 1	Signaling	216	0.495	0.769	0.3263	0.01		1	1	0	2018	2018
Triple-Negative Breast Carcinoma	C4722518	WNT10B	7480	O00744	Wnt family member 10B	Signaling	90	0.576	0.654	0.0003616	0.02		1	2	0	2013	2019
Triple-Negative Breast Carcinoma	C4722518	WNT3	7473	P56703	Wnt family member 3	Signaling	140	0.536	0.808	0.87515	0.01		1	1	0	2019	2019
Triple-Negative Breast Carcinoma	C4722518	WNT3A	89780	P56704	Wnt family member 3A	Signaling	141	0.532	0.769	0.96491	0.05		1	5	0	2015	2019
Triple-Negative Breast Carcinoma	C4722518	WNT5A	7474	P41221	Wnt family member 5A	Signaling	375	0.443	0.808	0.98732	0.02		1	2	0	2016	2018
Triple-Negative Breast Carcinoma	C4722518	WT1	7490	P19544	WT1 transcription factor	Nucleic acid binding	446	0.422	0.808	0.99648	0.02		1	2	0	2015	2017
Triple-Negative Breast Carcinoma	C4722518	WT1-AS	51352	Q06250	WT1 antisense RNA		71	0.597	0.615		0.02		1	2	0	2015	2019
Triple-Negative Breast Carcinoma	C4722518	WWC1	23286	Q8IX03	WW and C2 domain containing 1		71	0.61	0.692	0.00039438	0.03		1	3	0	2018	2019
Triple-Negative Breast Carcinoma	C4722518	WWOX	51741	Q9NZC7	WW domain containing oxidoreductase	Enzyme	356	0.453	0.808	1.2376e-15	0.05		1	5	0	2018	2019
Triple-Negative Breast Carcinoma	C4722518	WWTR1	25937	Q9GZV5	WW domain containing transcription regulator 1	Enzyme modulator	134	0.529	0.615	0.93914	0.01		1	1	0	2018	2018
Triple-Negative Breast Carcinoma	C4722518	XBP1	7494	P17861	X-box binding protein 1		234	0.477	0.846	0.032014	0.01		1	1	0	2014	2014
Triple-Negative Breast Carcinoma	C4722518	XIAP	331	P98170	X-linked inhibitor of apoptosis	Enzyme modulator	321	0.447	0.808	0.91837	0.02		1	2	0	2014	2017
Triple-Negative Breast Carcinoma	C4722518	XIST	7503		X inactive specific transcript		146	0.522	0.808		0.01		1	1	0	2016	2016
Triple-Negative Breast Carcinoma	C4722518	XPC	7508	Q01831	XPC complex subunit, DNA damage recognition and repair factor	Nucleic acid binding	211	0.504	0.808	3.6866e-11	0.01		1	1	2	2014	2014
Triple-Negative Breast Carcinoma	C4722518	XPO1	7514	O14980	exportin 1	Receptor	178	0.504	0.692	1	0.01		1	1	0	2014	2014
Triple-Negative Breast Carcinoma	C4722518	XRCC1	7515	P18887	X-ray repair cross complementing 1		410	0.421	0.923	6.3386e-09	0.02		1	2	1	2014	2014
Triple-Negative Breast Carcinoma	C4722518	XRCC2	7516	O43543	X-ray repair cross complementing 2		187	0.512	0.731	3.955e-07	0.02		1	2	1	2015	2015
Triple-Negative Breast Carcinoma	C4722518	XRCC3	7517	O43542	X-ray repair cross complementing 3		184	0.505	0.769	1.9134e-10	0.02		1	2	1	2015	2016
Triple-Negative Breast Carcinoma	C4722518	XRCC4	7518	Q13426	X-ray repair cross complementing 4		192	0.528	0.769	8.2774e-07	0.02		1	2	1	2014	2019
Triple-Negative Breast Carcinoma	C4722518	YAP1	10413	P46937	Yes associated protein 1	Enzyme modulator	374	0.432	0.808	0.99918	0.09		1	9	0	2017	2019
Triple-Negative Breast Carcinoma	C4722518	YBX1	4904	P67809	Y-box binding protein 1		148	0.519	0.769	0.94646	0.05		1	5	0	2012	2019
Triple-Negative Breast Carcinoma	C4722518	ZEB1	6935	P37275	zinc finger E-box binding homeobox 1	Transcription factor	310	0.442	0.808	0.96665	0.1		1	12	0	2010	2019
Triple-Negative Breast Carcinoma	C4722518	ZEB2	9839	O60315	zinc finger E-box binding homeobox 2	Transcription factor	292	0.471	0.808	1	0.06		1	6	0	2015	2019
Triple-Negative Breast Carcinoma	C4722518	ZEB2-AS1	100303491		ZEB2 antisense RNA 1		34	0.674	0.5		0.01		1	1	0	2019	2019
Triple-Negative Breast Carcinoma	C4722518	ZFX	7543	P17010	zinc finger protein X-linked	Transcription factor	66	0.599	0.538	0.99831	0.01		1	1	0	2019	2019
Triple-Negative Breast Carcinoma	C4722518	ZIC1	7545	Q15915	Zic family member 1	Transcription factor	124	0.545	0.731	0.93378	0.01		1	1	0	2019	2019
Triple-Negative Breast Carcinoma	C4722518	ZNF326	284695	Q5BKZ1	zinc finger protein 326		15	0.76	0.192	0.90182	0.01		1	1	0	2017	2017
Triple-Negative Breast Carcinoma	C4722518	ZNF469	84627	Q96JG9	zinc finger protein 469		101	0.584	0.769	0.71866	0.01		1	1	0	2018	2018
Triple-Negative Breast Carcinoma	C4722518	ZNF654	55279	Q8IZM8	zinc finger protein 654	Enzyme	85	0.582	0.5	0.99753	0.02		1	2	0	2016	2017
Triple-Negative Breast Carcinoma	C4722518	ZNRD2	10534	O60232	zinc ribbon domain containing 2		311	0.443	0.769	1.8426e-07	0.04		1	4	0	2014	2019
Triple-Negative Breast Carcinoma	C4722518	ZRANB1	54764	Q9UGI0	zinc finger RANBP2-type containing 1	Enzyme	9	0.839	0.115	0.99885	0.01		1	1	0	2018	2018
Triple-Negative Breast Carcinoma	C4722518	ZSCAN1	284312	Q8NBB4	zinc finger and SCAN domain containing 1		12	0.78	0.308	4.3802e-07	0.01		1	1	0	2016	2016

## Sheet: TNBCa
Disease	Disease_id	Gene	Gene_id	UniProt	Gene_Full_Name	Protein_Class	N_diseases_g	DSI_g	DPI_g	pLI	Score_gda	EL_gda	EI_gda	N_PMIDs	N_SNPs_gda	First_Ref	Last_Ref
Triple-Negative Breast Cancer Finding	C2348819	BARD1	580	Q99728	BRCA1 associated RING domain 1		75	0.597	0.538	1.3777e-24	0.1			0	2

## Sheet: norm1
ID	Gene.symbol	Gene.title	log2(fold change)	-LOG10(Pvalue)
6526	TICRR	TOPBP1 interacting checkpoint and replication regulator	-1.001	2.747
12	APOBEC3B	apolipoprotein B mRNA editing enzyme catalytic subunit 3B	-1.002	2.717
39594	CD59	CD59 molecule	-1.002	3.045
19401	DIEXF	digestive organ expansion factor homolog (zebrafish)	-1.002	2.395
39644	GPT2	glutamic--pyruvic transaminase 2	-1.002	2.528
32256	PABPC1	poly(A) binding protein cytoplasmic 1	-1.002	3.463
14089	TUBA3C	tubulin alpha 3c	-1.002	5.021
41748	ANKRD27	ankyrin repeat domain 27	-1.003	2.57
30369	EZR	ezrin	-1.003	3.069
18892	GALNT2	polypeptide N-acetylgalactosaminyltransferase 2	-1.003	2.198
33829	KRTCAP2	keratinocyte associated protein 2	-1.003	4.298
12399	ACOT9	acyl-CoA thioesterase 9	-1.004	3.317
7779	SMCO4	single-pass membrane protein with coiled-coil domains 4	-1.004	2.416
37129	WNK1	WNK lysine deficient protein kinase 1	-1.004	5.173
29787	ATR	ATR serine/threonine kinase	-1.005	3.167
17087	DMRT2	doublesex and mab-3 related transcription factor 2	-1.005	2.679
14783	DUSP12	dual specificity phosphatase 12	-1.005	2.434
18313	G2E3	G2/M-phase specific E3 ubiquitin protein ligase	-1.005	2.319
38882	SLC25A5	solute carrier family 25 member 5	-1.006	8.992
41969	PITRM1	pitrilysin metallopeptidase 1	-1.007	3.1
33203	PRIM1	primase (DNA) subunit 1	-1.007	2.749
22638	GADD45B	growth arrest and DNA damage inducible beta	-1.008	2.255
8404	GAPDH	glyceraldehyde-3-phosphate dehydrogenase	-1.008	5.463
16630	NMI	N-myc and STAT interactor	-1.008	3.067
15050	TUBA1A	tubulin alpha 1a	-1.008	4.938
6351	FYN	FYN proto-oncogene, Src family tyrosine kinase	-1.009	2.711
9452	NKIRAS2	NFKB inhibitor interacting Ras like 2	-1.009	2.837
33038	YWHAH	tyrosine 3-monooxygenase/tryptophan 5-monooxygenase activation protein eta	-1.009	5.272
31694	ZDHHC9	zinc finger DHHC-type containing 9	-1.009	4.192
8597	ACBD3	acyl-CoA binding domain containing 3	-1.01	5.182
37022	ADCY2	adenylate cyclase 2	-1.01	2.201
9624	BRMS1	breast cancer metastasis suppressor 1	-1.01	2.355
15228	RAN	RAN, member RAS oncogene family	-1.01	3.884
37399	VAPB	VAMP associated protein B and C	-1.01	3.142
29718	DPM3	dolichyl-phosphate mannosyltransferase subunit 3	-1.011	2.908
16712	MC1R	melanocortin 1 receptor	-1.011	2.34
15669	PCGF6	polycomb group ring finger 6	-1.011	2.424
11617	PPIB	peptidylprolyl isomerase B	-1.011	3.069
13486	STAT3	signal transducer and activator of transcription 3	-1.011	2.689
19614	TKT	transketolase	-1.011	3.153
13865	PLPPR4	phospholipid phosphatase related 4	-1.012	2.072
37075	TMEM54	transmembrane protein 54	-1.012	2.555
13857	RABL6	RAB, member RAS oncogene family-like 6	-1.013	3.505
35196	SMCHD1	structural maintenance of chromosomes flexible hinge domain containing 1	-1.013	2.114
32314	STK3	serine/threonine kinase 3	-1.013	2.057
26594	ABCF1	ATP binding cassette subfamily F member 1	-1.014	3.975
34019	MAD2L2	MAD2 mitotic arrest deficient-like 2 (yeast)	-1.014	4.395
29517	PRKDC	protein kinase, DNA-activated, catalytic polypeptide	-1.014	4.9
43340	PTPRJ	protein tyrosine phosphatase, receptor type J	-1.014	2.665
19853	SLC35C2	solute carrier family 35 member C2	-1.014	2.18
31637	ATP2C1	ATPase secretory pathway Ca2+ transporting 1	-1.015	2.875
3968	FAM3A	family with sequence similarity 3 member A	-1.015	3.198
42658	MAPK1	mitogen-activated protein kinase 1	-1.015	2.55
4982	PSMD12	proteasome 26S subunit, non-ATPase 12	-1.015	6.581
14690	TRIM11	tripartite motif containing 11	-1.015	3.295
23961	TRMT6	tRNA methyltransferase 6	-1.015	3.278
25392	XPO1	exportin 1	-1.015	3.521
10396	EMG1	EMG1, N1-specific pseudouridine methyltransferase	-1.016	2.855
23084	MIF	macrophage migration inhibitory factor (glycosylation-inhibiting factor)	-1.016	4.333
28150	ANKLE2	ankyrin repeat and LEM domain containing 2	-1.017	2.034
28438	CDK6	cyclin dependent kinase 6	-1.017	2.129
38295	DCUN1D1	defective in cullin neddylation 1 domain containing 1	-1.017	2.205
4662	GPNMB	glycoprotein nmb	-1.018	3.435
17562	LRRC8B	leucine rich repeat containing 8 family member B	-1.018	2.69
36138	LSG1	large 60S subunit nuclear export GTPase 1	-1.018	2.606
7723	ODF2	outer dense fiber of sperm tails 2	-1.018	3.239
40151	AKT1S1	AKT1 substrate 1	-1.02	2.532
7514	NANOS3	nanos C2HC-type zinc finger 3	-1.02	1.875
35974	RPL26L1	ribosomal protein L26 like 1	-1.02	5.218
18375	ANP32B	acidic nuclear phosphoprotein 32 family member B	-1.021	4.233
32735	DCLRE1C	DNA cross-link repair 1C	-1.021	2.388
40672	PRKCDBP	protein kinase C delta binding protein	-1.021	2.815
20301	SKIL	SKI-like proto-oncogene	-1.021	3.654
43697	LCLAT1	lysocardiolipin acyltransferase 1	-1.022	5.102
275	POLE2	DNA polymerase epsilon 2, accessory subunit	-1.022	2.326
40909	LAMTOR2	late endosomal/lysosomal adaptor, MAPK and MTOR activator 2	-1.023	3.481
33227	NCOA7	nuclear receptor coactivator 7	-1.023	2.379
8019	ABHD17C	abhydrolase domain containing 17C	-1.024	2.681
34686	CDT1	chromatin licensing and DNA replication factor 1	-1.024	3.499
27119	PUS7	pseudouridylate synthase 7 (putative)	-1.024	4.431
39205	RCN2	reticulocalbin 2	-1.024	6.76
39827	SRC	SRC proto-oncogene, non-receptor tyrosine kinase	-1.024	2.288
15537	TXN	thioredoxin	-1.024	5.622
9684	CSRP2	cysteine and glycine rich protein 2	-1.025	1.897
6131	STIL	SCL/TAL1 interrupting locus	-1.025	3.56
18777	BTG3	BTG anti-proliferation factor 3	-1.026	2.246
38820	ELN	elastin	-1.026	2.049
43633	OSTF1	osteoclast stimulating factor 1	-1.026	3.819
4405	PNOC	prepronociceptin	-1.026	3.603
38636	SEL1L3	SEL1L family member 3	-1.026	2.256
13091	C2orf69	chromosome 2 open reading frame 69	-1.027	2.485
12204	WRB-SH3BGR///WRB	WRB-SH3BGR readthrough///tryptophan rich basic protein	-1.027	2.588
17012	PTK2	protein tyrosine kinase 2	-1.028	4.924
36602	RANBP9	RAN binding protein 9	-1.028	4.511
17994	TRIM27	tripartite motif containing 27	-1.028	3.494
12933	FKBP10	FK506 binding protein 10	-1.029	2.258
3455	PCNT	pericentrin	-1.029	4.71
5307	YEATS4	YEATS domain containing 4	-1.029	3.042
36971	GRB2	growth factor receptor bound protein 2	-1.03	4.498
14368	CFL1	cofilin 1	-1.031	6.319
19878	KIF21A	kinesin family member 21A	-1.031	4.812
41998	OTULIN	OTU deubiquitinase with linear linkage specificity	-1.031	2.529
40554	PCYT1A	phosphate cytidylyltransferase 1, choline, alpha	-1.031	3.592
34770	CASC9	cancer susceptibility candidate 9 (non-protein coding)	-1.032	2.363
20179	CEP170	centrosomal protein 170	-1.032	1.919
29446	ZFP64	ZFP64 zinc finger protein	-1.032	2.354
21198	H2AFY	H2A histone family member Y	-1.033	3.794
3689	RRP15	ribosomal RNA processing 15 homolog	-1.033	4.956
33022	ITPKC	inositol-trisphosphate 3-kinase C	-1.034	2.405
9880	MLX	MLX, MAX dimerization protein	-1.034	2.073
7682	TUBB6	tubulin beta 6 class V	-1.034	2.202
10891	ATXN2L	ataxin 2 like	-1.035	4.907
32139	HCCS	holocytochrome c synthase	-1.035	3.988
5498	ME2	malic enzyme 2	-1.035	2.886
27008	OTX1	orthodenticle homeobox 1	-1.035	2.496
38073	CHCHD2	coiled-coil-helix-coiled-coil-helix domain containing 2	-1.036	3.629
16668	FOXM1	forkhead box M1	-1.036	2.221
31822	HS6ST3	heparan sulfate 6-O-sulfotransferase 3	-1.036	2.107
30268	NOLC1	nucleolar and coiled-body phosphoprotein 1	-1.036	3.997
27142	SHFM1	split hand/foot malformation (ectrodactyly) type 1	-1.036	5.875
10078	ARSB	arylsulfatase B	-1.037	2.212
28994	MYO1E	myosin IE	-1.037	2.665
1453	ATP6V1F	ATPase H+ transporting V1 subunit F	-1.038	3.941
2388	CCDC71L	coiled-coil domain containing 71-like	-1.038	2.076
42521	ADA	adenosine deaminase	-1.039	2.286
30605	BOLA1	bolA family member 1	-1.039	2.981
24449	CDCA2	cell division cycle associated 2	-1.039	2.103
28468	FMO3	flavin containing monooxygenase 3	-1.039	1.877
7461	HPCAL1	hippocalcin like 1	-1.039	2.316
45016	SEC13	SEC13 homolog, nuclear pore and COPII coat complex component	-1.039	5.032
2652	CREM	cAMP responsive element modulator	-1.04	1.926
12067	MMS22L	MMS22 like, DNA repair protein	-1.04	2.227
29319	PSMD8	proteasome 26S subunit, non-ATPase 8	-1.04	4.534
24384	LRWD1	leucine rich repeats and WD repeat domain containing 1	-1.041	3.959
44436	RNF187	ring finger protein 187	-1.041	3.1
35381	TTC26	tetratricopeptide repeat domain 26	-1.041	3.643
43575	FDPS	farnesyl diphosphate synthase	-1.042	5.806
16318	HSD11B1	hydroxysteroid 11-beta dehydrogenase 1	-1.042	2.111
2133	MSH6	mutS homolog 6	-1.042	4.663
39538	NSMCE2	NSE2/MMS21 homolog, SMC5-SMC6 complex SUMO ligase	-1.042	3.69
13195	SLAIN2	SLAIN motif family member 2	-1.042	3.57
14990	KDM1B	lysine demethylase 1B	-1.043	2.478
35378	PXMP2	peroxisomal membrane protein 2	-1.043	2.662
19023	UBA6	ubiquitin like modifier activating enzyme 6	-1.043	2.943
40769	HIST1H4D	histone cluster 1, H4d	-1.044	3.516
22813	MTDH	metadherin	-1.044	4.186
34490	NOP16	NOP16 nucleolar protein	-1.044	3.012
24290	RIMKLA	ribosomal modification protein rimK like family member A	-1.044	4.852
38774	CBR1	carbonyl reductase 1	-1.045	1.886
2013	VTA1	vesicle trafficking 1	-1.045	4.584
42041	AGPAT3	1-acylglycerol-3-phosphate O-acyltransferase 3	-1.046	3.088
18190	CAPZA2	capping actin protein of muscle Z-line alpha subunit 2	-1.046	3.78
28254	CDH24	cadherin 24	-1.046	1.924
42918	LRPPRC	leucine rich pentatricopeptide repeat containing	-1.046	5.675
34083	GUK1	guanylate kinase 1	-1.047	5.625
9965	SLC25A6	solute carrier family 25 member 6	-1.047	5.042
29619	SMS	spermine synthase	-1.047	4.666
32529	TMEM147	transmembrane protein 147	-1.047	3.534
23300	TXNL4A	thioredoxin like 4A	-1.047	3.799
34223	NDUFS8	NADH:ubiquinone oxidoreductase core subunit S8	-1.048	3.947
33423	PSMG1	proteasome assembly chaperone 1	-1.048	5.95
20284	SOX2	SRY-box 2	-1.048	2.395
8117	ATP13A3	ATPase 13A3	-1.049	4.545
30271	CBX3	chromobox 3	-1.049	10.185
30270	DLX5	distal-less homeobox 5	-1.05	3.933
35936	PGD	phosphogluconate dehydrogenase	-1.05	2.377
6165	CENPJ	centromere protein J	-1.051	4.112
32877	CLEC4E	C-type lectin domain family 4 member E	-1.051	3.374
37535	HMGCS1	3-hydroxy-3-methylglutaryl-CoA synthase 1	-1.051	3.44
11837	PPAT	phosphoribosyl pyrophosphate amidotransferase	-1.051	5.09
29176	TFB2M	transcription factor B2, mitochondrial	-1.051	3.613
10523	NHP2	NHP2 ribonucleoprotein	-1.052	2.949
32149	PTGIR	prostaglandin I2 (prostacyclin) receptor (IP)	-1.052	2.594
31367	STX6	syntaxin 6	-1.052	2.298
21394	TOMM40L	translocase of outer mitochondrial membrane 40 like	-1.052	2.353
17108	BRI3BP	BRI3 binding protein	-1.053	2.282
28054	C8orf33	chromosome 8 open reading frame 33	-1.053	4.463
15851	MYO10	myosin X	-1.053	2.23
11638	TAF2	TATA-box binding protein associated factor 2	-1.053	2.386
4226	ABHD12	abhydrolase domain containing 12	-1.054	2.423
40190	CNTFR	ciliary neurotrophic factor receptor	-1.054	2.55
33220	DCUN1D5	defective in cullin neddylation 1 domain containing 5	-1.054	4.262
12190	INTS2	integrator complex subunit 2	-1.054	4.011
22102	EFCAB10	EF-hand calcium binding domain 10	-1.055	2.491
19856	PRRC2A	proline rich coiled-coil 2A	-1.055	3.474
38709	PTPN11	protein tyrosine phosphatase, non-receptor type 11	-1.055	5.036
42312	UBA2	ubiquitin like modifier activating enzyme 2	-1.055	5.513
13488	ANAPC5	anaphase promoting complex subunit 5	-1.056	3.636
24643	LETM1	leucine zipper and EF-hand containing transmembrane protein 1	-1.056	2.65
36494	TJP2	tight junction protein 2	-1.056	3.232
8032	ERO1A	endoplasmic reticulum oxidoreductase 1 alpha	-1.057	2.346
6319	IRAK1	interleukin 1 receptor associated kinase 1	-1.057	3.174
40682	ZIC2	Zic family member 2	-1.057	3.123
14311	DEPDC7	DEP domain containing 7	-1.058	2.455
36193	OASL	2'-5'-oligoadenylate synthetase like	-1.058	1.926
31775	TAF5	TATA-box binding protein associated factor 5	-1.058	3.366
22691	NAGK	N-acetylglucosamine kinase	-1.059	3.067
33535	ADCY3	adenylate cyclase 3	-1.06	3.355
28195	ITPR3	inositol 1,4,5-trisphosphate receptor type 3	-1.06	2.641
17574	LINC00689	long intergenic non-protein coding RNA 689	-1.06	2.002
13980	LRRC14	leucine rich repeat containing 14	-1.06	2.592
36195	TRAM1	translocation associated membrane protein 1	-1.06	4.757
43162	MAPK13	mitogen-activated protein kinase 13	-1.061	3.166
29697	MAPRE1	microtubule associated protein RP/EB family member 1	-1.061	3.562
14814	ENAH	enabled homolog (Drosophila)	-1.062	3.771
4555	MMD	monocyte to macrophage differentiation associated	-1.062	3.817
27650	SAMD9	sterile alpha motif domain containing 9	-1.062	2.228
2455	SLC22A9	solute carrier family 22 member 9	-1.062	2.064
31439	CDKL5	cyclin dependent kinase like 5	-1.063	2.046
29338	HIF1A	hypoxia inducible factor 1 alpha subunit	-1.063	2.876
19741	NDUFB11	NADH:ubiquinone oxidoreductase subunit B11	-1.063	5.988
3126	PI4K2B	phosphatidylinositol 4-kinase type 2 beta	-1.063	3.217
17191	PRPS1L1	phosphoribosyl pyrophosphate synthetase 1-like 1	-1.063	2.428
42599	QRSL1	glutaminyl-tRNA synthase (glutamine-hydrolyzing)-like 1	-1.063	2.462
5072	FGD3	FYVE, RhoGEF and PH domain containing 3	-1.064	2.484
32861	HTRA4	HtrA serine peptidase 4	-1.064	1.972
36025	PALM2	paralemmin 2	-1.064	2.045
18201	S100A4	S100 calcium binding protein A4	-1.064	1.885
15195	RALBP1	ralA binding protein 1	-1.065	2.317
28957	TMEM79	transmembrane protein 79	-1.065	2.35
30649	ARHGAP39	Rho GTPase activating protein 39	-1.066	2.842
23291	HLTF	helicase like transcription factor	-1.066	4.252
22620	MNT	MAX network transcriptional repressor	-1.066	4.149
3281	NANS	N-acetylneuraminate synthase	-1.066	2.669
27958	ZMYND19	zinc finger MYND-type containing 19	-1.066	2.155
34956	KDELC2	KDEL motif containing 2	-1.067	3.607
30429	RMND5A	required for meiotic nuclear division 5 homolog A	-1.067	4.628
23447	CHMP1B	charged multivesicular body protein 1B	-1.068	4.065
31286	B4GALT5	beta-1,4-galactosyltransferase 5	-1.069	4.47
31861	CLEC5A	C-type lectin domain family 5 member A	-1.069	2.107
25461	IER3IP1	immediate early response 3 interacting protein 1	-1.069	6.044
28210	S100A11	S100 calcium binding protein A11	-1.069	3.618
8396	MFAP2	microfibrillar associated protein 2	-1.071	3.295
2614	BAK1	BCL2 antagonist/killer 1	-1.072	4.59
39972	DBF4	DBF4 zinc finger	-1.072	2.833
1268	LOC283454	uncharacterized LOC283454	-1.072	1.989
6369	SOHLH1	spermatogenesis and oogenesis specific basic helix-loop-helix 1	-1.072	3.292
43828	XPNPEP3	X-prolyl aminopeptidase 3	-1.072	4.083
33522	B3GALNT1	beta-1,3-N-acetylgalactosaminyltransferase 1 (globoside blood group)	-1.073	2.47
32519	GALNT18	polypeptide N-acetylgalactosaminyltransferase 18	-1.073	1.969
30876	SHISA3	shisa family member 3	-1.073	2.698
19510	TTC9C	tetratricopeptide repeat domain 9C	-1.074	2.276
15072	CEP128	centrosomal protein 128	-1.075	2.247
39340	GK	glycerol kinase	-1.076	2.84
16534	PUF60	poly(U) binding splicing factor 60	-1.076	4.841
12867	COX5A	cytochrome c oxidase subunit 5A	-1.078	5.659
14222	F11R	F11 receptor	-1.078	4.322
33789	HEBP2	heme binding protein 2	-1.078	3.61
29281	MDH2	malate dehydrogenase 2	-1.078	3.507
32812	TEX261	testis expressed 261	-1.078	3.294
34483	CAPZA1	capping actin protein of muscle Z-line alpha subunit 1	-1.079	5.491
33107	FAM210A	family with sequence similarity 210 member A	-1.079	3.437
15927	H2AFV	H2A histone family member V	-1.079	8.287
11952	TLDC1	TBC/LysM-associated domain containing 1	-1.079	2.048
32317	C6orf141	chromosome 6 open reading frame 141	-1.08	2.438
24051	MPHOSPH9	M-phase phosphoprotein 9	-1.08	2.641
15278	TNFRSF11B	TNF receptor superfamily member 11b	-1.08	2.045
23136	WDR5	WD repeat domain 5	-1.08	3.385
28194	YBX1	Y-box binding protein 1	-1.08	4.831
24712	DDIT4	DNA damage inducible transcript 4	-1.081	2.309
33955	SLC20A1	solute carrier family 20 member 1	-1.081	2.085
42199	WISP1	WNT1 inducible signaling pathway protein 1	-1.081	3.788
43484	RBL1	RB transcriptional corepressor like 1	-1.083	2.053
18870	CSTF1	cleavage stimulation factor subunit 1	-1.085	4.19
14246	RPS19BP1	ribosomal protein S19 binding protein 1	-1.085	4.067
12880	TRIM37	tripartite motif containing 37	-1.085	2.767
237	ATP11B	ATPase phospholipid transporting 11B (putative)	-1.086	3.122
32225	CCR2	C-C motif chemokine receptor 2	-1.086	1.928
40582	CCT6A	chaperonin containing TCP1 subunit 6A	-1.086	4.683
17925	HAUS6	HAUS augmin like complex subunit 6	-1.086	2.446
24593	TNPO2	transportin 2	-1.086	2.892
15455	UHRF1	ubiquitin like with PHD and ring finger domains 1	-1.086	4.811
19868	FOSL2	FOS like 2, AP-1 transcription factor subunit	-1.087	2.311
25812	PHF20L1	PHD finger protein 20-like 1	-1.087	1.932
12828	DDX49	DEAD-box helicase 49	-1.088	3.032
29707	DYSF	dysferlin	-1.088	2.886
18899	MRS2	MRS2, magnesium transporter	-1.088	4.539
27488	YTHDF1	YTH N6-methyladenosine RNA binding protein 1	-1.088	3.833
4362	ESPL1	extra spindle pole bodies like 1, separase	-1.089	3.03
109	HSPD1	heat shock protein family D (Hsp60) member 1	-1.089	6.821
15260	CHST11	carbohydrate (chondroitin 4) sulfotransferase 11	-1.09	3.558
32520	CTTNBP2NL	CTTNBP2 N-terminal like	-1.09	2.395
19067	DSC2	desmocollin 2	-1.09	2.57
38421	PAK1IP1	PAK1 interacting protein 1	-1.09	3.072
32353	TSEN15	tRNA splicing endonuclease subunit 15	-1.09	4.741
40918	NOP10	NOP10 ribonucleoprotein	-1.091	6.918
32290	TSEN34	tRNA splicing endonuclease subunit 34	-1.091	4.856
31333	ARF1	ADP ribosylation factor 1	-1.092	5.468
11614	PTRH2	peptidyl-tRNA hydrolase 2	-1.092	4.667
41801	SPAG1	sperm associated antigen 1	-1.092	2.967
18219	CYB561	cytochrome b561	-1.093	2.453
31404	LYRM4	LYR motif containing 4	-1.094	1.877
22610	POLR2K	RNA polymerase II subunit K	-1.094	5.667
27117	SNRPA1	small nuclear ribonucleoprotein polypeptide A'	-1.094	3.37
22252	DLAT	dihydrolipoamide S-acetyltransferase	-1.095	3.07
27177	GALNT13	polypeptide N-acetylgalactosaminyltransferase 13	-1.096	2.771
33150	GNB4	G protein subunit beta 4	-1.096	3.219
13819	KDELR1	KDEL endoplasmic reticulum protein retention receptor 1	-1.096	3.117
37938	SENP5	SUMO1/sentrin specific peptidase 5	-1.096	3.168
11312	CAPRIN1	cell cycle associated protein 1	-1.097	4.779
7939	FAM86JP	family with sequence similarity 86, member A pseudogene	-1.097	3.844
29394	PTP4A1	protein tyrosine phosphatase type IVA, member 1	-1.097	2.565
14763	AP1G1	adaptor related protein complex 1 gamma 1 subunit	-1.098	2.487
3441	BFAR	bifunctional apoptosis regulator	-1.098	2.222
13668	MEX3C	mex-3 RNA binding family member C	-1.098	2.219
22771	TXNDC12	thioredoxin domain containing 12	-1.098	2.572
7275	ABCF2	ATP binding cassette subfamily F member 2	-1.099	3.061
5916	SLC35A2	solute carrier family 35 member A2	-1.099	6.269
39216	HILPDA	hypoxia inducible lipid droplet associated	-1.1	4.192
5750	KDELC1	KDEL motif containing 1	-1.1	2.419
23134	TIMM10	translocase of inner mitochondrial membrane 10 homolog (yeast)	-1.1	3.567
35577	GPX7	glutathione peroxidase 7	-1.101	2.423
2228	PSMG3	proteasome assembly chaperone 3	-1.101	4.339
28060	UBALD2	UBA like domain containing 2	-1.101	2.874
24318	LYAR	Ly1 antibody reactive	-1.102	4.945
26192	IPO13	importin 13	-1.103	2.995
17351	TBCE	tubulin folding cofactor E	-1.104	5.175
12437	ACTR1A	ARP1 actin-related protein 1 homolog A, centractin alpha	-1.105	2.336
40542	KDELR2	KDEL endoplasmic reticulum protein retention receptor 2	-1.105	4.807
38056	MBOAT2	membrane bound O-acyltransferase domain containing 2	-1.105	2.281
57	SLC7A1	solute carrier family 7 member 1	-1.105	2.887
40261	VDAC1	voltage dependent anion channel 1	-1.105	2.884
13921	ASRGL1	asparaginase like 1	-1.106	2.067
38273	FTL	ferritin light chain	-1.106	2.953
37681	LINC00461	long intergenic non-protein coding RNA 461	-1.106	3.478
5655	NFIL3	nuclear factor, interleukin 3 regulated	-1.106	5.369
26551	NIPA1	non imprinted in Prader-Willi/Angelman syndrome 1	-1.106	2.468
5774	YES1	YES proto-oncogene 1, Src family tyrosine kinase	-1.106	4.723
9416	MRPL46	mitochondrial ribosomal protein L46	-1.107	3.81
12378	VAV2	vav guanine nucleotide exchange factor 2	-1.107	7.002
35103	CXADRP2	coxsackie virus and adenovirus receptor pseudogene 2	-1.108	2.646
3709	PAICS	phosphoribosylaminoimidazole carboxylase; phosphoribosylaminoimidazolesuccinocarboxamide synthase	-1.108	5.392
15969	BMS1	BMS1, ribosome biogenesis factor	-1.109	3.331
36833	BSG	basigin (Ok blood group)	-1.11	2.144
20367	SLC35C1	solute carrier family 35 member C1	-1.11	2.548
28768	STK26	serine/threonine protein kinase 26	-1.11	3.426
27421	ZC3HC1	zinc finger C3HC-type containing 1	-1.11	3.627
8827	PCTP	phosphatidylcholine transfer protein	-1.111	3.271
30328	FXR2	FMR1 autosomal homolog 2	-1.112	2.726
7558	PIK3R3	phosphoinositide-3-kinase regulatory subunit 3	-1.113	3.703
40565	SLC39A7	solute carrier family 39 member 7	-1.113	4.684
24476	ZNF451	zinc finger protein 451	-1.113	4.577
44511	PDXK	pyridoxal (pyridoxine, vitamin B6) kinase	-1.114	2.305
11935	UBL5	ubiquitin like 5	-1.114	6.242
5635	COX6B1	cytochrome c oxidase subunit 6B1	-1.115	8.383
44750	HSF1	heat shock transcription factor 1	-1.115	4.482
30260	CASC7///AGO2	cancer susceptibility candidate 7 (non-protein coding)///argonaute 2, RISC catalytic component	-1.116	3.799
27485	GNB1L	G protein subunit beta 1 like	-1.116	2.174
40294	HDAC2	histone deacetylase 2	-1.116	5.468
12237	SLC25A13	solute carrier family 25 member 13	-1.116	2.76
10359	SURF4	surfeit 4	-1.116	4.972
7516	VLDLR	very low density lipoprotein receptor	-1.116	2.029
32961	HIST1H4I	histone cluster 1, H4i	-1.117	6.494
32865	RCC1	regulator of chromosome condensation 1	-1.117	3.116
15574	RAP2A	RAP2A, member of RAS oncogene family	-1.118	4.068
22595	ATXN7L1	ataxin 7 like 1	-1.119	2.131
5468	HOXC8	homeobox C8	-1.119	2.725
32765	HSPE1	heat shock protein family E (Hsp10) member 1	-1.119	8.12
4626	INHBA	inhibin beta A subunit	-1.119	2.105
49	MSANTD3	Myb/SANT DNA binding domain containing 3	-1.119	2.877
8616	RAB8A	RAB8A, member RAS oncogene family	-1.119	5.006
18735	FANCI	Fanconi anemia complementation group I	-1.12	5.259
19025	MRPS23	mitochondrial ribosomal protein S23	-1.12	4.458
6825	PALB2	partner and localizer of BRCA2	-1.12	3.227
10844	RBM34	RNA binding motif protein 34	-1.12	4.996
25370	TMEM167A	transmembrane protein 167A	-1.12	4.166
19967	VRK1	vaccinia related kinase 1	-1.12	4.712
36851	ZNF706	zinc finger protein 706	-1.12	3.998
12653	INTS6	integrator complex subunit 6	-1.121	3.167
23620	NUP85	nucleoporin 85	-1.121	3.852
32828	RGS9BP	regulator of G-protein signaling 9 binding protein	-1.121	2.378
36910	WWTR1	WW domain containing transcription regulator 1	-1.121	2.198
24304	PAPD5	poly(A) RNA polymerase D5, non-canonical	-1.122	2.836
3275	ZNF252P	zinc finger protein 252, pseudogene	-1.122	2.516
3415	CRAMP1	cramped chromatin regulator homolog 1	-1.123	1.888
31159	CERS2	ceramide synthase 2	-1.124	4.543
17655	DIS3	DIS3 homolog, exosome endoribonuclease and 3'-5' exoribonuclease	-1.124	3.119
17552	KCNK1	potassium two pore domain channel subfamily K member 1	-1.124	2.262
41270	LOXL1	lysyl oxidase like 1	-1.124	2.26
7053	TRIM24	tripartite motif containing 24	-1.124	4.369
29355	METTL6	methyltransferase like 6	-1.125	2.134
42087	NACC1	nucleus accumbens associated 1	-1.125	5.74
10543	NDUFA4L2	NDUFA4, mitochondrial complex associated like 2	-1.125	3.65
31401	PDCD10	programmed cell death 10	-1.125	5.108
13155	BMP6	bone morphogenetic protein 6	-1.126	2.107
3644	CST7	cystatin F	-1.126	2.474
29108	ZSCAN31	zinc finger and SCAN domain containing 31	-1.126	2.303
20645	C3orf70	chromosome 3 open reading frame 70	-1.127	4.109
16974	CSTF2	cleavage stimulation factor subunit 2	-1.127	3.937
12398	ATP2B4	ATPase plasma membrane Ca2+ transporting 4	-1.128	2.738
16539	HIST2H4B	histone cluster 2, H4b	-1.128	6.197
6618	UTP11	UTP11, small subunit processome component homolog (S. cerevisiae)	-1.128	4.637
36644	CCT6P1	chaperonin containing TCP1 subunit 6 pseudogene 1	-1.129	5.331
4196	HEATR3	HEAT repeat containing 3	-1.129	3.873
22368	TPMT	thiopurine S-methyltransferase	-1.129	2.175
15223	CRLS1	cardiolipin synthase 1	-1.13	5.618
25558	R3HDM1	R3H domain containing 1	-1.13	3.666
23810	SDHC	succinate dehydrogenase complex subunit C	-1.13	3.141
20344	MRPS33	mitochondrial ribosomal protein S33	-1.131	3.082
28183	CENPL	centromere protein L	-1.132	3.051
6047	DCBLD1	discoidin, CUB and LCCL domain containing 1	-1.132	2.339
25036	DYRK2	dual specificity tyrosine phosphorylation regulated kinase 2	-1.132	4.775
2006	FAM98A	family with sequence similarity 98 member A	-1.132	3.179
8514	GGCT	gamma-glutamylcyclotransferase	-1.132	5.693
19481	CNOT1	CCR4-NOT transcription complex subunit 1	-1.133	3.497
6504	CDK3	cyclin dependent kinase 3	-1.134	3.637
4420	TMTC4	transmembrane and tetratricopeptide repeat containing 4	-1.134	3.64
61	YWHAZ	tyrosine 3-monooxygenase/tryptophan 5-monooxygenase activation protein zeta	-1.134	5.116
1162	ARL6IP1	ADP ribosylation factor like GTPase 6 interacting protein 1	-1.136	6.545
34672	CELSR3	cadherin EGF LAG seven-pass G-type receptor 3	-1.136	3.507
33394	CYC1	cytochrome c1	-1.136	2.49
4323	GCNT2	glucosaminyl (N-acetyl) transferase 2, I-branching enzyme (I blood group)	-1.136	2.551
34192	MGST3	microsomal glutathione S-transferase 3	-1.136	5.971
20741	MRPS15	mitochondrial ribosomal protein S15	-1.136	5.482
14185	TMEM33	transmembrane protein 33	-1.136	3.452
26764	UBE2F	ubiquitin conjugating enzyme E2 F (putative)	-1.136	3.889
29013	LDHA	lactate dehydrogenase A	-1.137	6.82
9863	LOC554206	leucine carboxyl methyltransferase 1 pseudogene	-1.137	2.273
20826	ABHD3	abhydrolase domain containing 3	-1.138	3.134
8420	CCNY	cyclin Y	-1.138	2.001
33842	GNL3L	G protein nucleolar 3 like	-1.138	3.231
33687	IPO9	importin 9	-1.138	3.005
9854	KIF2A	kinesin family member 2A	-1.138	3.974
31053	LYN	LYN proto-oncogene, Src family tyrosine kinase	-1.138	1.907
37357	SLC25A43	solute carrier family 25 member 43	-1.138	2.582
38895	PRDX2	peroxiredoxin 2	-1.139	4.438
6949	DNAJC3-AS1	DNAJC3 antisense RNA 1 (head to head)	-1.141	3.078
3322	CPSF3	cleavage and polyadenylation specific factor 3	-1.142	3.451
34836	LGALSL	galectin like	-1.142	2.74
18997	PUS1	pseudouridylate synthase 1	-1.142	2.121
633	SLC50A1	solute carrier family 50 member 1	-1.142	3.197
10131	CPNE8	copine 8	-1.143	2.151
43563	DNAJA3	DnaJ heat shock protein family (Hsp40) member A3	-1.143	2.421
14615	PARP2	poly(ADP-ribose) polymerase 2	-1.143	2.595
35815	SLC2A4RG	SLC2A4 regulator	-1.144	7.335
33644	VKORC1L1	vitamin K epoxide reductase complex subunit 1 like 1	-1.144	3.713
28491	MSN	moesin	-1.145	3.02
17497	PHLDA2	pleckstrin homology like domain family A member 2	-1.145	2.04
34909	AP1M2	adaptor related protein complex 1 mu 2 subunit	-1.146	2.781
13562	POMK	protein-O-mannose kinase	-1.148	2.462
38685	MAGEA8	MAGE family member A8	-1.149	1.88
364	NDUFB9	NADH:ubiquinone oxidoreductase subunit B9	-1.149	4.403
5555	SYAP1	synapse associated protein 1	-1.149	5.203
12960	MAP6D1	MAP6 domain containing 1	-1.15	1.894
193	PANX1	pannexin 1	-1.15	2.01
40373	SERF2	small EDRK-rich factor 2	-1.15	5.061
32851	SLC25A25	solute carrier family 25 member 25	-1.15	1.984
29022	CISD2	CDGSH iron sulfur domain 2	-1.151	3.365
39311	FKBP1A	FK506 binding protein 1A	-1.151	2.116
30883	HMGB2	high mobility group box 2	-1.151	4.462
30181	NDUFA8	NADH:ubiquinone oxidoreductase subunit A8	-1.151	5.471
12560	ST7	suppression of tumorigenicity 7	-1.151	2.972
13445	ZSWIM1	zinc finger SWIM-type containing 1	-1.151	2.935
44602	ATP5J2	ATP synthase, H+ transporting, mitochondrial Fo complex subunit F2	-1.152	5.586
25605	B3GALNT2	beta-1,3-N-acetylgalactosaminyltransferase 2	-1.152	3.563
42464	NME1	NME/NM23 nucleoside diphosphate kinase 1	-1.152	4.756
43710	KDELR3	KDEL endoplasmic reticulum protein retention receptor 3	-1.155	1.892
32115	PGK1	phosphoglycerate kinase 1	-1.155	5.947
20658	SMIM13	small integral membrane protein 13	-1.155	2.873
18317	TRMT12	tRNA methyltransferase 12 homolog	-1.156	1.983
21229	PLAA	phospholipase A2 activating protein	-1.157	3.247
34805	SEC22A	SEC22 homolog A, vesicle trafficking protein	-1.157	2.838
20197	VPS72	vacuolar protein sorting 72 homolog	-1.157	4.122
19084	CARMIL1	capping protein regulator and myosin 1 linker 1	-1.158	2.519
26264	DEF8	differentially expressed in FDCP 8 homolog	-1.158	3.774
39535	KCNG3	potassium voltage-gated channel modifier subfamily G member 3	-1.158	2.86
33302	TUBB	tubulin beta class I	-1.158	5.574
19409	CPA4	carboxypeptidase A4	-1.159	3.486
22950	KCNJ10	potassium voltage-gated channel subfamily J member 10	-1.159	1.994
35178	ZNF787	zinc finger protein 787	-1.159	2.157
14209	ARHGEF39	Rho guanine nucleotide exchange factor 39	-1.16	2.923
30338	ATP6V0B	ATPase H+ transporting V0 subunit b	-1.16	5.517
21863	CNIH2	cornichon family AMPA receptor auxiliary protein 2	-1.16	2.591
18162	C1orf43	chromosome 1 open reading frame 43	-1.161	5.13
6137	CHRDL2	chordin like 2	-1.161	2.934
30359	SLC44A1	solute carrier family 44 member 1	-1.161	2.428
29408	POP4	POP4 homolog, ribonuclease P/MRP subunit	-1.163	4.756
28362	GOLT1B	golgi transport 1B	-1.164	3.321
21215	GPI	glucose-6-phosphate isomerase	-1.164	6.352
29257	RRN3	RRN3 homolog, RNA polymerase I transcription factor	-1.164	2.956
4758	LINC00152	long intergenic non-protein coding RNA 152	-1.165	2.73
25225	PFN2	profilin 2	-1.165	3.034
526	DHRSX	dehydrogenase/reductase X-linked	-1.166	2.165
9037	IL12RB2	interleukin 12 receptor subunit beta 2	-1.166	2.131
17266	PLOD1	procollagen-lysine,2-oxoglutarate 5-dioxygenase 1	-1.167	2.769
31006	CST1	cystatin SN	-1.168	2.976
7507	DCTN3	dynactin subunit 3	-1.168	2.179
16035	DNAJC6	DnaJ heat shock protein family (Hsp40) member C6	-1.168	2.261
11915	IL13RA2	interleukin 13 receptor subunit alpha 2	-1.168	1.934
14621	PAM16	presequence translocase associated motor 16 homolog	-1.168	4.883
17008	ABTB2	ankyrin repeat and BTB domain containing 2	-1.169	3.281
21026	CLCN5	chloride voltage-gated channel 5	-1.169	1.93
16585	CXCR4	C-X-C motif chemokine receptor 4	-1.169	2.627
12006	SPAG9	sperm associated antigen 9	-1.169	1.917
26288	GADD45GIP1	GADD45G interacting protein 1	-1.17	6.309
40118	PDPK1	3-phosphoinositide dependent protein kinase 1	-1.17	2.991
266	IL2RA	interleukin 2 receptor subunit alpha	-1.171	3.608
33045	KHDRBS3	KH RNA binding domain containing, signal transduction associated 3	-1.171	2.023
7311	ACO1	aconitase 1	-1.172	3.23
38013	FBLN5	fibulin 5	-1.172	2.324
35507	RAP2B	RAP2B, member of RAS oncogene family	-1.172	3.862
5847	BSPRY	B-box and SPRY domain containing	-1.174	2.605
26919	EML4	echinoderm microtubule associated protein like 4	-1.174	2.948
10813	KNL1	kinetochore scaffold 1	-1.174	5.253
34594	LRRC42	leucine rich repeat containing 42	-1.174	3.873
14447	KIAA1841	KIAA1841	-1.175	2.898
32307	MID1	midline 1	-1.175	2.273
25824	NAA10	N(alpha)-acetyltransferase 10, NatA catalytic subunit	-1.175	2.489
30056	SDHAF4	succinate dehydrogenase complex assembly factor 4	-1.175	2.193
44128	SLC35B1	solute carrier family 35 member B1	-1.175	5.714
40879	CD24	CD24 molecule	-1.177	2.548
41495	CDV3	CDV3 homolog	-1.177	3.241
32826	CEP57L1	centrosomal protein 57 like 1	-1.177	3.526
23746	P4HB	prolyl 4-hydroxylase subunit beta	-1.177	3.467
11653	RBM8A	RNA binding motif protein 8A	-1.177	6.772
1140	ARV1	ARV1 homolog, fatty acid homeostasis modulator	-1.178	3.209
18356	DDB1	damage specific DNA binding protein 1	-1.178	4.038
28497	KIAA0513	KIAA0513	-1.178	2.352
40203	NID2	nidogen 2	-1.178	2.301
8610	C9orf142	chromosome 9 open reading frame 142	-1.179	4.05
27899	COPA	coatomer protein complex subunit alpha	-1.179	4.641
11323	CTPS2	CTP synthase 2	-1.179	2.874
30067	GSK3A	glycogen synthase kinase 3 alpha	-1.179	3.655
5280	E2F4	E2F transcription factor 4	-1.18	2.634
6995	LEFTY2	left-right determination factor 2	-1.18	2.173
42159	EAF2	ELL associated factor 2	-1.181	2.607
43481	LAPTM5	lysosomal protein transmembrane 5	-1.181	2.297
7609	NDUFAF4	NADH:ubiquinone oxidoreductase complex assembly factor 4	-1.181	4.371
5809	PTPMT1	protein tyrosine phosphatase, mitochondrial 1	-1.181	5.189
22518	COX6A1	cytochrome c oxidase subunit 6A1	-1.182	5.985
22983	UBR7	ubiquitin protein ligase E3 component n-recognin 7 (putative)	-1.182	2.021
2706	HSPB11	heat shock protein family B (small) member 11	-1.183	6.136
2640	MRPL55	mitochondrial ribosomal protein L55	-1.183	2.239
4616	NREP	neuronal regeneration related protein	-1.183	2.901
21817	ADAMTS3	ADAM metallopeptidase with thrombospondin type 1 motif 3	-1.184	1.886
36470	DCAF13	DDB1 and CUL4 associated factor 13	-1.184	3.211
7147	PDIA6	protein disulfide isomerase family A member 6	-1.185	3.782
11649	MIS18A	MIS18 kinetochore protein A	-1.186	3.563
36703	TPM3	tropomyosin 3	-1.186	8.809
21258	ZNF438	zinc finger protein 438	-1.186	2.647
14771	DRAP1	DR1 associated protein 1	-1.187	4.135
27920	DYNC1LI1	dynein cytoplasmic 1 light intermediate chain 1	-1.187	3.027
21071	GM2A	GM2 ganglioside activator	-1.187	2.116
15320	MIR4435-2HG	MIR4435-2 host gene	-1.187	2.812
24634	ZBTB2	zinc finger and BTB domain containing 2	-1.187	2.055
20416	OPLAH	5-oxoprolinase (ATP-hydrolysing)	-1.188	3.836
14662	SEPHS1	selenophosphate synthetase 1	-1.188	3.723
12725	MVK	mevalonate kinase	-1.189	2.236
6623	PKM	pyruvate kinase, muscle	-1.189	4.107
29544	DDX23	DEAD-box helicase 23	-1.191	1.96
6585	RHBDL2	rhomboid like 2	-1.191	2.419
4065	GINS3	GINS complex subunit 3	-1.192	4.149
43272	MAPKAPK5	mitogen-activated protein kinase-activated protein kinase 5	-1.192	5.197
18960	MMP14	matrix metallopeptidase 14	-1.192	2.241
33131	CNKSR3	CNKSR family member 3	-1.193	3.485
44295	CXorf65	chromosome X open reading frame 65	-1.193	2.687
25552	PSMD4	proteasome 26S subunit, non-ATPase 4	-1.193	5.757
25085	ID3	inhibitor of DNA binding 3, HLH protein	-1.194	2.716
17149	VKORC1	vitamin K epoxide reductase complex subunit 1	-1.194	4.785
38106	EIF4H	eukaryotic translation initiation factor 4H	-1.195	3.664
7873	GNG5	G protein subunit gamma 5	-1.195	6.063
36808	IL18	interleukin 18	-1.195	2.129
373	MFN1	mitofusin 1	-1.195	6.65
39186	AURKB	aurora kinase B	-1.196	2.957
11703	CTSA	cathepsin A	-1.196	2.924
3477	HIST1H4H	histone cluster 1, H4h	-1.196	6.259
8368	HSD17B12	hydroxysteroid 17-beta dehydrogenase 12	-1.198	5.727
15429	PRKAR2B	protein kinase cAMP-dependent type II regulatory subunit beta	-1.198	2.67
19822	NOP56	NOP56 ribonucleoprotein	-1.199	3.863
17146	PIP5K1A	phosphatidylinositol-4-phosphate 5-kinase type 1 alpha	-1.199	4.212
44727	RFC5	replication factor C subunit 5	-1.199	3.899
12564	SH3BP5L	SH3 binding domain protein 5 like	-1.199	3.181
1094	EIF4G1	eukaryotic translation initiation factor 4 gamma 1	-1.2	3.757
13054	MRPS25	mitochondrial ribosomal protein S25	-1.2	5.32
38475	ATMIN	ATM interactor	-1.201	4.068
26442	MAL2	mal, T-cell differentiation protein 2 (gene/pseudogene)	-1.201	4.508
26795	NRN1	neuritin 1	-1.201	4.123
13974	PARL	presenilin associated rhomboid like	-1.201	2.638
38860	DCTPP1	dCTP pyrophosphatase 1	-1.202	4.622
26826	PSMA5	proteasome subunit alpha 5	-1.202	4.883
39400	SEC61A1	Sec61 translocon alpha 1 subunit	-1.202	3.667
27505	CD58	CD58 molecule	-1.203	4.353
31258	SPSB1	splA/ryanodine receptor domain and SOCS box containing 1	-1.203	2.567
24069	SULF1	sulfatase 1	-1.203	2.173
24735	C5orf34	chromosome 5 open reading frame 34	-1.204	3.551
12485	TNFRSF12A	TNF receptor superfamily member 12A	-1.204	3.979
15477	NUAK2	NUAK family kinase 2	-1.205	3.245
39436	PPIH	peptidylprolyl isomerase H	-1.205	2.433
40724	FIGNL1	fidgetin like 1	-1.206	2.652
673	MRPS12	mitochondrial ribosomal protein S12	-1.206	5.318
34642	OAS3	2'-5'-oligoadenylate synthetase 3	-1.206	2.284
15191	CNPY3	canopy FGF signaling regulator 3	-1.207	3.327
5834	DNMT3A	DNA methyltransferase 3 alpha	-1.207	5.869
24432	DTD2	D-tyrosyl-tRNA deacylase 2 (putative)	-1.207	2.658
12552	MRPL34	mitochondrial ribosomal protein L34	-1.207	3.998
4109	PSMD1	proteasome 26S subunit, non-ATPase 1	-1.207	4.373
15439	TMPO	thymopoietin	-1.207	3.847
12456	VHLL	von Hippel-Lindau tumor suppressor like	-1.207	2.873
2681	HM13	histocompatibility minor 13	-1.208	3.421
14961	ADAT1	adenosine deaminase, tRNA specific 1	-1.209	2.741
28919	AKR1A1	aldo-keto reductase family 1 member A1	-1.21	4.781
3338	GAPDHP62	glyceraldehyde 3 phosphate dehydrogenase pseudogene 62	-1.211	5.074
20099	LRRC8D	leucine rich repeat containing 8 family member D	-1.211	3.246
40876	NUS1	NUS1 dehydrodolichyl diphosphate synthase subunit	-1.212	5.036
27703	NUTF2	nuclear transport factor 2	-1.212	4.641
43703	LNPK	lunapark, ER junction formation factor	-1.213	3.374
27841	SMC2	structural maintenance of chromosomes 2	-1.213	2.745
10585	TCEB1	transcription elongation factor B subunit 1	-1.213	5.903
33886	PEX13	peroxisomal biogenesis factor 13	-1.214	4.293
17960	PSMA4	proteasome subunit alpha 4	-1.214	6.202
44733	MTHFD1L	methylenetetrahydrofolate dehydrogenase (NADP+ dependent) 1-like	-1.216	3.36
42448	HIST1H1B	histone cluster 1, H1b	-1.217	4.877
14272	ACTA1	actin, alpha 1, skeletal muscle	-1.218	2.777
43510	CIART	circadian associated repressor of transcription	-1.218	2.197
21226	LRRC15	leucine rich repeat containing 15	-1.218	2.683
24771	MROH1	maestro heat like repeat family member 1	-1.218	2.209
28317	TTC39B	tetratricopeptide repeat domain 39B	-1.218	2.426
22119	LANCL2	LanC like 2	-1.219	1.986
26969	NARF	nuclear prelamin A recognition factor	-1.219	5.071
8776	OSR2	odd-skipped related transciption factor 2	-1.219	1.928
21100	MRPL14	mitochondrial ribosomal protein L14	-1.22	7.023
17705	PIGU	phosphatidylinositol glycan anchor biosynthesis class U	-1.22	2.261
35346	GMCL1	germ cell-less, spermatogenesis associated 1	-1.221	3.446
43699	MAGI3	membrane associated guanylate kinase, WW and PDZ domain containing 3	-1.221	2.489
8189	STIP1	stress induced phosphoprotein 1	-1.221	4.097
2926	DR1	down-regulator of transcription 1	-1.222	2.649
11723	KMT5A	lysine methyltransferase 5A	-1.222	4.011
20784	PTPRD	protein tyrosine phosphatase, receptor type D	-1.222	4.463
25102	RIOK1	RIO kinase 1	-1.222	3.438
41386	ATP6V0E2-AS1	ATP6V0E2 antisense RNA 1	-1.223	2.205
26910	SDHB	succinate dehydrogenase complex iron sulfur subunit B	-1.224	2.091
40975	AMD1P3	adenosylmethionine decarboxylase 1 pseudogene 3	-1.226	4.477
34025	IDI2	isopentenyl-diphosphate delta isomerase 2	-1.226	3.799
21580	MARCHF3	membrane associated ring-CH-type finger 3	-1.226	4.197
6745	TCEB3	transcription elongation factor B subunit 3	-1.226	3.907
702	CCSAP	centriole, cilia and spindle associated protein	-1.227	3.685
31667	MIEF1	mitochondrial elongation factor 1	-1.227	4.021
44662	MRPL36	mitochondrial ribosomal protein L36	-1.227	3.726
34250	CDH6	cadherin 6	-1.229	2.049
23180	ACTL6A	actin like 6A	-1.23	5.167
22121	PDZD11	PDZ domain containing 11	-1.23	6.636
44826	PSMB3	proteasome subunit beta 3	-1.23	4.313
22109	DHFR2	dihydrofolate reductase 2	-1.231	2.373
40313	SLC26A9	solute carrier family 26 member 9	-1.231	2.657
1546	SNRPC	small nuclear ribonucleoprotein polypeptide C	-1.231	4.121
4748	GTF2H3	general transcription factor IIH subunit 3	-1.232	2.505
11767	ORAI1	ORAI calcium release-activated calcium modulator 1	-1.233	3.484
17656	PAG1	phosphoprotein membrane anchor with glycosphingolipid microdomains 1	-1.233	2.452
13376	UBA52	ubiquitin A-52 residue ribosomal protein fusion product 1	-1.233	2.142
1999	NCBP2	nuclear cap binding protein subunit 2	-1.235	4.499
1576	RIDA	reactive intermediate imine deaminase A homolog	-1.235	3.367
16253	CDC42EP3	CDC42 effector protein 3	-1.236	2.453
29695	SNX10	sorting nexin 10	-1.236	2.078
12537	DDIAS	DNA damage induced apoptosis suppressor	-1.237	6.373
8679	EOMES	eomesodermin	-1.237	4.106
31266	SRPK1	SRSF protein kinase 1	-1.237	8.281
4674	WDYHV1	WDYHV motif containing 1	-1.237	3.068
43245	APMAP	adipocyte plasma membrane associated protein	-1.238	4.749
8274	COX7A2L	cytochrome c oxidase subunit 7A2 like	-1.238	4.317
12706	FUNDC2	FUN14 domain containing 2	-1.238	3.295
18331	LOC105373383	uncharacterized LOC105373383	-1.238	2.527
14609	UQCRQ	ubiquinol-cytochrome c reductase complex III subunit VII	-1.238	5.82
9239	ACRV1	acrosomal vesicle protein 1	-1.239	2.287
20404	RNF168	ring finger protein 168	-1.239	2.231
8012	CCNF	cyclin F	-1.24	3.693
3355	EHBP1	EH domain binding protein 1	-1.24	3.264
31300	MZT1	mitotic spindle organizing protein 1	-1.24	5.577
6987	TRIM28	tripartite motif containing 28	-1.24	2.599
20680	C7orf13	chromosome 7 open reading frame 13	-1.241	3.035
18289	POLR2I	RNA polymerase II subunit I	-1.241	3.568
28515	SPTSSA	serine palmitoyltransferase small subunit A	-1.241	3.68
43396	TIMM23B///TIMM23	translocase of inner mitochondrial membrane 23 homolog B///translocase of inner mitochondrial membrane 23	-1.241	6.378
34269	ZNF174	zinc finger protein 174	-1.241	3.177
18769	LSS	lanosterol synthase (2,3-oxidosqualene-lanosterol cyclase)	-1.242	2.281
4174	CPM	carboxypeptidase M	-1.243	2.245
7043	SLC4A2	solute carrier family 4 member 2	-1.243	2.05
4839	ANAPC7	anaphase promoting complex subunit 7	-1.244	3.888
35756	GRPEL1	GrpE like 1, mitochondrial	-1.244	3.236
42681	IGLV6-57	immunoglobulin lambda variable 6-57	-1.244	3.758
40350	PSMB2	proteasome subunit beta 2	-1.246	7.456
14176	S100A10	S100 calcium binding protein A10	-1.247	3.878
28943	AP2M1	adaptor related protein complex 2 mu 1 subunit	-1.248	5.581
14367	SLC44A2	solute carrier family 44 member 2	-1.248	4.195
17953	CENPO	centromere protein O	-1.249	2.463
30873	CHTF18	chromosome transmission fidelity factor 18	-1.249	4.998
8156	NDUFA6	NADH:ubiquinone oxidoreductase subunit A6	-1.249	5.249
33249	NTM	neurotrimin	-1.249	3.26
7287	PARN	poly(A)-specific ribonuclease	-1.249	4.127
19331	SDC1	syndecan 1	-1.249	2.432
40538	DUS1L	dihydrouridine synthase 1 like	-1.25	4.148
29178	ERP27	endoplasmic reticulum protein 27	-1.25	2.086
10455	LINC01399	long intergenic non-protein coding RNA 1399	-1.25	7.001
30048	RUBCN	RUN and cysteine rich domain containing beclin 1 interacting protein	-1.25	3.036
22327	APOO	apolipoprotein O	-1.251	5.234
19599	DDIT3	DNA damage inducible transcript 3	-1.251	2.601
15987	ME1	malic enzyme 1	-1.251	2
30552	SNAP29	synaptosome associated protein 29	-1.252	2.337
24236	TGFBI	transforming growth factor beta induced	-1.252	1.908
22272	ATP5SL	ATP5S like	-1.253	3.833
19778	GXYLT1	glucoside xylosyltransferase 1	-1.253	3.441
38095	MLF1	myeloid leukemia factor 1	-1.255	2.112
33275	NDUFAB1	NADH:ubiquinone oxidoreductase subunit AB1	-1.255	7.423
16638	PDHX	pyruvate dehydrogenase complex component X	-1.255	3.587
38965	CDH19	cadherin 19	-1.256	2.528
16423	NFE2	nuclear factor, erythroid 2	-1.256	2.643
20725	SRP68	signal recognition particle 68	-1.256	3.809
33370	GART	phosphoribosylglycinamide formyltransferase, phosphoribosylglycinamide synthetase, phosphoribosylaminoimidazole synthetase	-1.258	3.86
1338	GLO1	glyoxalase I	-1.258	3.14
9166	HLA-DMA	major histocompatibility complex, class II, DM alpha	-1.258	1.878
7406	LMAN2	lectin, mannose binding 2	-1.258	4.014
9201	NUP205	nucleoporin 205	-1.258	4.944
4546	OLFML2B	olfactomedin like 2B	-1.258	2.428
20637	SAR1A	secretion associated Ras related GTPase 1A	-1.258	6.369
15652	NEMP1	nuclear envelope integral membrane protein 1	-1.259	2.739
5991	LINC00680	long intergenic non-protein coding RNA 680	-1.26	2.866
28687	MAGED1	MAGE family member D1	-1.26	3.551
28148	SNRNP25	small nuclear ribonucleoprotein U11/U12 subunit 25	-1.26	2.705
18666	CALU	calumenin	-1.261	4.797
21369	H2AFJ	H2A histone family member J	-1.261	10.689
11950	CD28	CD28 molecule	-1.262	3.646
14774	AFAP1-AS1	AFAP1 antisense RNA 1	-1.263	2.55
12686	F8	coagulation factor VIII	-1.264	2.046
39638	LPCAT1	lysophosphatidylcholine acyltransferase 1	-1.264	3.642
27588	ATP6V1C1	ATPase H+ transporting V1 subunit C1	-1.265	4.387
7197	GOSR2	golgi SNAP receptor complex member 2	-1.265	4.285
26813	NUP93	nucleoporin 93	-1.265	4.007
2708	LRRC41	leucine rich repeat containing 41	-1.266	2.62
8969	NSFL1C	NSFL1 cofactor	-1.266	4.14
35068	DERL1	derlin 1	-1.267	4.98
7353	GSTA5	glutathione S-transferase alpha 5	-1.268	2.671
5075	ID2	inhibitor of DNA binding 2, HLH protein	-1.268	2.963
23784	LSM7	LSM7 homolog, U6 small nuclear RNA and mRNA degradation associated	-1.268	5.739
26876	PLAUR	plasminogen activator, urokinase receptor	-1.269	2.467
36008	PPIF	peptidylprolyl isomerase F	-1.269	3.912
33717	EIF2S2	eukaryotic translation initiation factor 2 subunit beta	-1.27	7.574
42838	SLC25A52	solute carrier family 25 member 52	-1.27	2.064
25400	DDIT4L	DNA damage inducible transcript 4 like	-1.273	2.691
9591	HPRT1	hypoxanthine phosphoribosyltransferase 1	-1.273	6.253
37977	RAB7B	RAB7B, member RAS oncogene family	-1.273	2.371
952	TSSC1	tumor suppressing subtransferable candidate 1	-1.273	2.646
23467	SF3B6	splicing factor 3b subunit 6	-1.274	6.071
16173	SH3GL1	SH3 domain containing GRB2 like 1, endophilin A2	-1.274	4.769
27454	ASUN	asunder, spermatogenesis regulator	-1.275	2.368
13929	MXD1	MAX dimerization protein 1	-1.275	3.126
25388	TIMM23	translocase of inner mitochondrial membrane 23	-1.275	5.904
18220	DESI1	desumoylating isopeptidase 1	-1.276	6.281
11995	FAM20B	family with sequence similarity 20 member B	-1.276	3.072
34954	CASP10	caspase 10	-1.277	4.064
2885	CASK	calcium/calmodulin dependent serine protein kinase	-1.278	1.973
35012	TTF2	transcription termination factor 2	-1.278	3.427
28977	SLC38A10	solute carrier family 38 member 10	-1.279	1.967
37529	PKDREJ	polycystin (PKD) family receptor for egg jelly	-1.28	2.468
34287	SUPT16H	SPT16 homolog, facilitates chromatin remodeling subunit	-1.28	2.671
40139	B3GALT6	beta-1,3-galactosyltransferase 6	-1.281	2.16
1577	TMEM165	transmembrane protein 165	-1.281	7.688
29728	C21orf58	chromosome 21 open reading frame 58	-1.282	1.963
40789	KIF4A	kinesin family member 4A	-1.282	4.758
21451	PSMC3IP	PSMC3 interacting protein	-1.283	3.672
29114	NDC1	NDC1 transmembrane nucleoporin	-1.284	2.474
37047	SEPT9	septin 9	-1.284	2.619
20045	BLACAT1	bladder cancer associated transcript 1 (non-protein coding)	-1.285	4.302
28119	DHFR	dihydrofolate reductase	-1.285	4.059
693	TMEM38B	transmembrane protein 38B	-1.285	3.097
34872	SYCP2	synaptonemal complex protein 2	-1.286	2.128
30061	SLC52A2	solute carrier family 52 member 2	-1.287	8.035
15557	CACYBP	calcyclin binding protein	-1.288	8.409
1437	KLHL23	kelch like family member 23	-1.289	2.93
3048	VIMP	VCP interacting membrane selenoprotein	-1.29	2.301
15518	KIF1C	kinesin family member 1C	-1.291	2.293
9417	NF2	neurofibromin 2	-1.291	2.316
27353	C8orf76	chromosome 8 open reading frame 76	-1.292	4.159
42395	COX7B	cytochrome c oxidase subunit 7B	-1.292	7.915
45088	MS4A4A	membrane spanning 4-domains A4A	-1.292	2.046
28333	RTN4IP1	reticulon 4 interacting protein 1	-1.292	2.285
26741	ESRP1	epithelial splicing regulatory protein 1	-1.293	3.562
27696	FANCB	Fanconi anemia complementation group B	-1.293	2.425
6942	MCM3	minichromosome maintenance complex component 3	-1.294	5.659
38531	TACO1	translational activator of cytochrome c oxidase I	-1.294	3.497
9865	DNA2	DNA replication helicase/nuclease 2	-1.295	2.911
25649	MRPL3	mitochondrial ribosomal protein L3	-1.295	3.947
41795	RTN4R	reticulon 4 receptor	-1.295	2.448
43197	CSK	c-src tyrosine kinase	-1.296	3.496
3793	ELAVL1	ELAV like RNA binding protein 1	-1.296	5.365
32930	CDC123	cell division cycle 123	-1.298	4.996
34289	CUL2	cullin 2	-1.298	5.234
2441	DIP2A	disco interacting protein 2 homolog A	-1.298	2.346
3472	FBXO5	F-box protein 5	-1.298	3.725
32586	SLC7A11	solute carrier family 7 member 11	-1.298	2.433
9454	CA5BP1	carbonic anhydrase 5B pseudogene 1	-1.299	2.196
5509	DNAJC2	DnaJ heat shock protein family (Hsp40) member C2	-1.299	5.249
34546	F5	coagulation factor V	-1.3	1.941
37626	CCNYL1	cyclin Y like 1	-1.301	2.404
7204	PHACTR2	phosphatase and actin regulator 2	-1.301	3.094
13948	ZBTB9	zinc finger and BTB domain containing 9	-1.302	2.33
31315	RCC2	regulator of chromosome condensation 2	-1.307	4.935
31407	RGS4	regulator of G-protein signaling 4	-1.307	2.245
14442	TUBA1C	tubulin alpha 1c	-1.307	11.395
42468	COL12A1	collagen type XII alpha 1 chain	-1.308	2.212
40637	SMKR1	small lysine rich protein 1	-1.308	1.923
41225	GARS	glycyl-tRNA synthetase	-1.309	5.143
182	OBP2A	odorant binding protein 2A	-1.31	1.927
877	POGK	pogo transposable element with KRAB domain	-1.31	4.583
39383	RBX1	ring-box 1	-1.311	6.603
6465	WSB2	WD repeat and SOCS box containing 2	-1.311	5.612
39646	HIST2H2AC	histone cluster 2, H2ac	-1.312	9.741
32208	FLVCR1	feline leukemia virus subgroup C cellular receptor 1	-1.313	5.264
22347	GTSE1	G2 and S-phase expressed 1	-1.313	4.524
37790	IPO5	importin 5	-1.313	6.171
20537	MYD88	myeloid differentiation primary response 88	-1.313	2.352
35179	RGS16	regulator of G-protein signaling 16	-1.314	3.07
16327	RRP1	ribosomal RNA processing 1	-1.314	4.133
13026	USP18	ubiquitin specific peptidase 18	-1.314	2.641
6312	CD276	CD276 molecule	-1.315	3.833
9924	AFAP1L1	actin filament associated protein 1 like 1	-1.316	2.248
40832	RAE1	ribonucleic acid export 1	-1.317	2.853
38489	PRDX1	peroxiredoxin 1	-1.318	5.362
22396	RIPK2	receptor interacting serine/threonine kinase 2	-1.318	5.566
13260	SNAPC1	small nuclear RNA activating complex polypeptide 1	-1.318	3.427
37016	CDK2	cyclin dependent kinase 2	-1.319	2.422
3907	MTFR1	mitochondrial fission regulator 1	-1.319	2.709
40855	RABIF	RAB interacting factor	-1.32	3.098
4588	SERAC1	serine active site containing 1	-1.32	2.338
25598	SLC16A10	solute carrier family 16 member 10	-1.32	1.991
20660	WHSC1	Wolf-Hirschhorn syndrome candidate 1	-1.32	4.398
30665	PTGES3L-AARSD1	PTGES3L-AARSD1 readthrough	-1.321	2.159
33616	KNTC1	kinetochore associated 1	-1.324	4.086
26561	ZHX1	zinc fingers and homeoboxes 1	-1.324	3.664
36974	MX2	MX dynamin like GTPase 2	-1.325	2.156
10175	UBQLN1	ubiquilin 1	-1.325	8.015
3735	AGTR2	angiotensin II receptor type 2	-1.326	2.978
44109	LMBR1	limb development membrane protein 1	-1.327	3.499
25215	METTL21A	methyltransferase like 21A	-1.327	2.417
43186	ORMDL2	ORMDL sphingolipid biosynthesis regulator 2	-1.327	3.805
39388	HOPX	HOP homeobox	-1.328	2.59
25178	CDK16	cyclin dependent kinase 16	-1.329	3.506
453	PML	promyelocytic leukemia	-1.329	3.012
844	RAB42	RAB42, member RAS oncogene family	-1.33	3.523
32831	KPNA3	karyopherin subunit alpha 3	-1.331	3.468
26619	COL5A2	collagen type V alpha 2 chain	-1.333	2.525
18196	GAS2L3	growth arrest specific 2 like 3	-1.333	2.639
39371	SAE1	SUMO1 activating enzyme subunit 1	-1.333	6.977
39136	CD207	CD207 molecule	-1.334	1.994
29945	SF3B4	splicing factor 3b subunit 4	-1.335	4.602
43647	TFDP1	transcription factor Dp-1	-1.335	4.246
38213	TFG	TRK-fused gene	-1.335	4.909
6122	LACTB2	lactamase beta 2	-1.336	2.582
13480	OR2B6	olfactory receptor family 2 subfamily B member 6	-1.336	2.48
29069	SRSF10	serine and arginine rich splicing factor 10	-1.337	5.419
29007	ATP6AP2	ATPase H+ transporting accessory protein 2	-1.338	7.944
31102	COA6	cytochrome c oxidase assembly factor 6	-1.338	6.812
29935	TIMM17A	translocase of inner mitochondrial membrane 17 homolog A (yeast)	-1.339	7.326
17982	C1orf106	chromosome 1 open reading frame 106	-1.34	2.476
19133	MYO19	myosin XIX	-1.34	2.364
4961	TMEM206	transmembrane protein 206	-1.34	4.485
20779	UCHL5	ubiquitin C-terminal hydrolase L5	-1.34	4.98
41430	ZNF200	zinc finger protein 200	-1.34	5.209
27940	TTL	tubulin tyrosine ligase	-1.342	2.082
12730	RAC2	ras-related C3 botulinum toxin substrate 2 (rho family, small GTP binding protein Rac2)	-1.344	2.135
2761	SPDL1	spindle apparatus coiled-coil protein 1	-1.345	4.942
4173	APOL6	apolipoprotein L6	-1.346	1.878
13979	CRIP1	cysteine rich protein 1	-1.346	2.231
14633	DHDH	dihydrodiol dehydrogenase	-1.346	3.933
44510	DSCR3	DSCR3 arrestin fold containing	-1.346	2.845
41868	DHTKD1	dehydrogenase E1 and transketolase domain containing 1	-1.347	5.29
30823	POLR2D	RNA polymerase II subunit D	-1.347	3.753
10776	SRXN1	sulfiredoxin 1	-1.347	2.979
45185	TIAM1	T-cell lymphoma invasion and metastasis 1	-1.348	2.07
14444	ZNF518B	zinc finger protein 518B	-1.348	1.967
5046	AIMP2	aminoacyl tRNA synthetase complex interacting multifunctional protein 2	-1.349	2.901
13342	DNAJB6	DnaJ heat shock protein family (Hsp40) member B6	-1.349	4.696
12908	TXNDC9	thioredoxin domain containing 9	-1.349	4.371
40149	AK2	adenylate kinase 2	-1.35	5.988
10267	NCR3LG1	natural killer cell cytotoxicity receptor 3 ligand 1	-1.35	1.968
34936	NUP58	nucleoporin 58	-1.35	4.676
8831	PLCL2	phospholipase C like 2	-1.35	2.593
31311	WDR34	WD repeat domain 34	-1.35	5.905
21683	P2RY14	purinergic receptor P2Y14	-1.351	3.085
36181	LOC101929122	uncharacterized LOC101929122	-1.352	2.065
41051	NUDT21	nudix hydrolase 21	-1.352	7.169
399	HACD4	3-hydroxyacyl-CoA dehydratase 4	-1.353	1.882
28936	MICAL2	microtubule associated monooxygenase, calponin and LIM domain containing 2	-1.353	2.261
7935	NABP1	nucleic acid binding protein 1	-1.353	3.852
18466	TRIM25	tripartite motif containing 25	-1.353	4.852
6322	UQCRH	ubiquinol-cytochrome c reductase hinge protein	-1.354	6.026
41646	ALYREF	Aly/REF export factor	-1.355	5.065
33238	COL8A1	collagen type VIII alpha 1 chain	-1.355	2.521
10909	ELOVL7	ELOVL fatty acid elongase 7	-1.355	2.696
34273	HRK	harakiri, BCL2 interacting protein	-1.355	2.253
42404	PLXNA4	plexin A4	-1.355	2.368
16889	TXNRD1	thioredoxin reductase 1	-1.356	3.658
26838	ZNF280A	zinc finger protein 280A	-1.356	2.085
27206	GNG3	G protein subunit gamma 3	-1.357	5.596
43329	EXOC8	exocyst complex component 8	-1.358	3.122
11457	KPNA4	karyopherin subunit alpha 4	-1.358	6.422
39141	MSL3	male-specific lethal 3 homolog (Drosophila)	-1.358	2.802
39381	THAP12	THAP domain containing 12	-1.358	4.569
30345	PTCD1	pentatricopeptide repeat domain 1	-1.359	3.461
33891	LDLR	low density lipoprotein receptor	-1.36	4.659
9399	PNPT1	polyribonucleotide nucleotidyltransferase 1	-1.36	6.738
5485	ESPNL	espin-like	-1.361	3.471
1003	NOXO1	NADPH oxidase organizer 1	-1.361	3.645
25083	RAD21	RAD21 cohesin complex component	-1.362	5.234
41247	TMEM123	transmembrane protein 123	-1.362	3.287
29121	SNX8	sorting nexin 8	-1.363	3.635
23406	TMEM41A	transmembrane protein 41A	-1.363	2.504
25662	ABL2	ABL proto-oncogene 2, non-receptor tyrosine kinase	-1.364	4.947
6238	FAM96B	family with sequence similarity 96 member B	-1.364	6.24
25434	ALAS1	5'-aminolevulinate synthase 1	-1.365	3.263
35421	BUB3	BUB3, mitotic checkpoint protein	-1.366	7.074
9415	SIX4	SIX homeobox 4	-1.366	4.24
2420	MAZ	MYC associated zinc finger protein	-1.368	4.453
36269	TP53BP2	tumor protein p53 binding protein 2	-1.368	4.015
41507	HOXB9	homeobox B9	-1.369	4.078
19511	OPN3	opsin 3	-1.369	2.707
20850	PARP14	poly(ADP-ribose) polymerase family member 14	-1.369	2.656
11851	PLEKHA8	pleckstrin homology domain containing A8	-1.369	3.447
25442	TARS	threonyl-tRNA synthetase	-1.369	5.583
6487	DIAPH3	diaphanous related formin 3	-1.37	3.631
5435	RCCD1	RCC1 domain containing 1	-1.37	4.263
3830	SPP1	secreted phosphoprotein 1	-1.37	2.314
26742	HIST1H3G	histone cluster 1, H3g	-1.371	7.052
36103	MORN3	MORN repeat containing 3	-1.372	1.947
20682	PFDN4	prefoldin subunit 4	-1.372	3.857
35215	DNAJB11	DnaJ heat shock protein family (Hsp40) member B11	-1.373	5.833
30786	LSM12	LSM12 homolog	-1.373	3.156
5794	NDUFA9	NADH:ubiquinone oxidoreductase subunit A9	-1.373	3.566
11406	LYPLA2	lysophospholipase II	-1.374	2.73
42692	PDE4DIP	phosphodiesterase 4D interacting protein	-1.375	2.801
18147	CBFB	core-binding factor beta subunit	-1.377	3.746
19445	HDGF	hepatoma-derived growth factor	-1.377	5.988
6275	COX17	COX17, cytochrome c oxidase copper chaperone	-1.378	6.693
38015	NUDT19	nudix hydrolase 19	-1.378	2.516
18029	SNRPD1	small nuclear ribonucleoprotein D1 polypeptide	-1.378	6.955
5663	CARS2	cysteinyl-tRNA synthetase 2, mitochondrial (putative)	-1.379	3.865
23871	EML1	echinoderm microtubule associated protein like 1	-1.379	3.165
39579	PHEX	phosphate regulating endopeptidase homolog, X-linked	-1.379	2.02
25089	GLRX	glutaredoxin	-1.382	3.308
35067	HIST1H3H	histone cluster 1, H3h	-1.382	8.182
2565	RNASEH2A	ribonuclease H2 subunit A	-1.382	6.35
24558	TRIM59	tripartite motif containing 59	-1.382	5.407
13639	PKN1	protein kinase N1	-1.383	2.142
19075	DEK	DEK proto-oncogene	-1.384	4.659
17911	SLC25A32	solute carrier family 25 member 32	-1.384	4.705
7800	HOXC-AS3	HOXC cluster antisense RNA 3	-1.385	2.156
14517	NLN	neurolysin	-1.385	3.305
17628	SAMSN1	SAM domain, SH3 domain and nuclear localization signals 1	-1.385	2.529
43229	LRR1	leucine rich repeat protein 1	-1.386	3.477
24860	MSH2	mutS homolog 2	-1.386	5.686
26956	IL1RAP	interleukin 1 receptor accessory protein	-1.387	4.847
30497	RACGAP1P	Rac GTPase activating protein 1 pseudogene	-1.387	7.474
24807	CKAP4	cytoskeleton associated protein 4	-1.388	3.407
2570	CTSL	cathepsin L	-1.388	5.339
23088	ANAPC11	anaphase promoting complex subunit 11	-1.389	7.411
15133	DCK	deoxycytidine kinase	-1.389	6.52
17599	SAYSD1	SAYSVFN motif domain containing 1	-1.389	4.027
8452	TREM1	triggering receptor expressed on myeloid cells 1	-1.389	3.658
42943	FAM89B	family with sequence similarity 89 member B	-1.39	3.905
42219	LINC00467	long intergenic non-protein coding RNA 467	-1.39	2.277
20143	NOCT	nocturnin	-1.39	4.152
30222	NXT1	nuclear transport factor 2 like export factor 1	-1.39	6.164
38436	GFM1	G elongation factor mitochondrial 1	-1.391	5.091
21576	MRPL19	mitochondrial ribosomal protein L19	-1.391	7.914
4355	UQCC2	ubiquinol-cytochrome c reductase complex assembly factor 2	-1.391	5.811
21748	SERPINE2	serpin family E member 2	-1.392	1.896
37725	ABHD16A	abhydrolase domain containing 16A	-1.393	6.219
8944	LSM4	LSM4 homolog, U6 small nuclear RNA and mRNA degradation associated	-1.393	7.474
43866	COX8A	cytochrome c oxidase subunit 8A	-1.394	6.973
6232	PDCD2L	programmed cell death 2 like	-1.394	3.815
33507	TIGIT	T-cell immunoreceptor with Ig and ITIM domains	-1.394	4.377
1537	BOLA3	bolA family member 3	-1.395	7.56
6710	PTH2R	parathyroid hormone 2 receptor	-1.395	2.18
298	CENPN	centromere protein N	-1.398	5.838
4168	NDUFB5	NADH:ubiquinone oxidoreductase subunit B5	-1.398	3.119
66	TMEM97	transmembrane protein 97	-1.398	3.626
30679	CLASP1	cytoplasmic linker associated protein 1	-1.399	4.426
2406	FBXO28	F-box protein 28	-1.399	4.01
36547	GEMIN6	gem nuclear organelle associated protein 6	-1.399	5.851
1582	IDI2-AS1	IDI2 antisense RNA 1	-1.4	2.725
28030	MRPL33	mitochondrial ribosomal protein L33	-1.4	2.379
19620	ABCC2	ATP binding cassette subfamily C member 2	-1.401	2.254
11347	ICMT	isoprenylcysteine carboxyl methyltransferase	-1.401	4.025
22504	CLDN14	claudin 14	-1.402	2.258
5889	WDR83	WD repeat domain 83	-1.404	4.589
8769	COL22A1	collagen type XXII alpha 1 chain	-1.405	3.199
32278	RPN2	ribophorin II	-1.406	4.385
42267	TIGAR	TP53 induced glycolysis regulatory phosphatase	-1.406	3.412
41931	EPT1	ethanolaminephosphotransferase 1	-1.407	4.879
27330	PCMT1	protein-L-isoaspartate (D-aspartate) O-methyltransferase	-1.407	3.358
30113	SLC6A10P	solute carrier family 6 member 10, pseudogene	-1.407	2.672
37895	CCT5	chaperonin containing TCP1 subunit 5	-1.408	5.847
27041	LRRCC1	leucine rich repeat and coiled-coil centrosomal protein 1	-1.408	4.367
31339	AHNAK2	AHNAK nucleoprotein 2	-1.409	1.906
29870	MRPL12	mitochondrial ribosomal protein L12	-1.409	4.114
43155	TMEM183B	transmembrane protein 183B	-1.41	8.08
27097	GFER	growth factor, augmenter of liver regeneration	-1.411	2.872
41510	CEP70	centrosomal protein 70	-1.413	3.922
14219	ANP32E	acidic nuclear phosphoprotein 32 family member E	-1.414	2.748
12966	GPR19	G protein-coupled receptor 19	-1.414	3.449
27815	POLR2J	RNA polymerase II subunit J	-1.414	5.364
21526	RAB31	RAB31, member RAS oncogene family	-1.414	2.639
11796	RCN3	reticulocalbin 3	-1.414	3.283
6159	TMEM104	transmembrane protein 104	-1.414	3.808
19363	ABHD17B	abhydrolase domain containing 17B	-1.415	4.145
30645	EME1	essential meiotic structure-specific endonuclease 1	-1.415	4.334
44252	HIST1H4K	histone cluster 1, H4k	-1.415	2.611
34106	PRKX	protein kinase, X-linked	-1.415	3.245
40793	CYCS	cytochrome c, somatic	-1.416	6.394
3457	FH	fumarate hydratase	-1.416	4.996
11246	LPGAT1	lysophosphatidylglycerol acyltransferase 1	-1.416	4.584
21202	PARP1	poly(ADP-ribose) polymerase 1	-1.416	6.191
12505	CKS1B	CDC28 protein kinase regulatory subunit 1B	-1.417	10.166
14600	MIF-AS1	MIF antisense RNA 1	-1.417	5.343
36413	URB2	URB2 ribosome biogenesis 2 homolog (S. cerevisiae)	-1.417	3.258
38810	SMOX	spermine oxidase	-1.418	2.396
3853	ERFE	erythroferrone	-1.421	2.583
8664	CSE1L	chromosome segregation 1 like	-1.423	8.838
37581	HIST1H4F	histone cluster 1, H4f	-1.424	7.523
37629	HYLS1	HYLS1, centriolar and ciliogenesis associated	-1.424	4.794
38762	MRPL37	mitochondrial ribosomal protein L37	-1.424	4.996
1347	PDCD5	programmed cell death 5	-1.424	6.443
16950	PPP1R14B	protein phosphatase 1 regulatory inhibitor subunit 14B	-1.425	5.664
13404	NPTX2	neuronal pentraxin 2	-1.426	3.149
37527	PRSS12	protease, serine 12	-1.426	2.272
1485	RIMS2	regulating synaptic membrane exocytosis 2	-1.427	2.184
19783	SOAT1	sterol O-acyltransferase 1	-1.428	2.511
40011	LOC105374952	uncharacterized LOC105374952	-1.429	2.401
146	YARS	tyrosyl-tRNA synthetase	-1.429	4.49
4533	JOSD1	Josephin domain containing 1	-1.43	3.632
8210	DYNLT3	dynein light chain Tctex-type 3	-1.431	4.024
16136	RBM33	RNA binding motif protein 33	-1.431	3.517
8905	COMMD5	COMM domain containing 5	-1.432	4.012
8573	TBL1XR1	transducin (beta)-like 1 X-linked receptor 1	-1.432	5.508
40503	DBN1	drebrin 1	-1.433	3.78
17535	FANCD2	Fanconi anemia complementation group D2	-1.433	4.839
5873	PSRC1	proline and serine rich coiled-coil 1	-1.433	4.335
28968	C19orf52	chromosome 19 open reading frame 52	-1.434	3.338
5287	CCDC150	coiled-coil domain containing 150	-1.434	5.101
32986	GNAI3	G protein subunit alpha i3	-1.434	4.685
27245	FAM83H	family with sequence similarity 83 member H	-1.435	3.872
16994	LY6E	lymphocyte antigen 6 complex, locus E	-1.436	2.012
18945	ALG3	ALG3, alpha-1,3- mannosyltransferase	-1.438	6.001
12099	AMMECR1	Alport syndrome, mental retardation, midface hypoplasia and elliptocytosis chromosomal region gene 1	-1.438	3.318
42673	XPOT	exportin for tRNA	-1.438	5.249
28605	CALR	calreticulin	-1.439	6.064
12600	GABPB1	GA binding protein transcription factor beta subunit 1	-1.439	2.732
36529	TEAD4	TEA domain transcription factor 4	-1.439	3.371
15219	CCDC167	coiled-coil domain containing 167	-1.44	3.676
20371	DONSON	downstream neighbor of SON	-1.441	4.783
32454	GFOD1	glucose-fructose oxidoreductase domain containing 1	-1.442	3.072
35947	GOT1	glutamic-oxaloacetic transaminase 1	-1.442	3.559
3931	TINCR	tissue differentiation-inducing non-protein coding RNA	-1.442	2.075
39300	IMPAD1	inositol monophosphatase domain containing 1	-1.443	4.588
27178	ATP11A	ATPase phospholipid transporting 11A	-1.445	3.457
43673	SSR3	signal sequence receptor subunit 3	-1.445	4.019
5451	OSGIN2	oxidative stress induced growth inhibitor family member 2	-1.447	2.702
33513	RAI14	retinoic acid induced 14	-1.448	2.207
25799	PECR	peroxisomal trans-2-enoyl-CoA reductase	-1.449	2.123
33005	JAKMIP1	janus kinase and microtubule interacting protein 1	-1.451	1.912
14538	RGS10	regulator of G-protein signaling 10	-1.451	3.959
22022	ANKIB1	ankyrin repeat and IBR domain containing 1	-1.452	4.808
21266	BCL2L12	BCL2 like 12	-1.452	4.307
34623	HIST1H2AJ	histone cluster 1, H2aj	-1.452	8.748
37861	P4HA2	prolyl 4-hydroxylase subunit alpha 2	-1.453	4.031
35805	PROSER1	proline and serine rich 1	-1.453	2.975
28456	C4orf19	chromosome 4 open reading frame 19	-1.454	2.838
2463	LRRC59	leucine rich repeat containing 59	-1.454	6.074
7436	ARNTL2	aryl hydrocarbon receptor nuclear translocator like 2	-1.455	3.416
17653	RHOBTB1	Rho related BTB domain containing 1	-1.455	2.445
30834	TIMP2	TIMP metallopeptidase inhibitor 2	-1.455	3.336
217	CD1A	CD1a molecule	-1.456	2.19
145	CEBPG	CCAAT/enhancer binding protein gamma	-1.457	5.969
17825	TRIM26	tripartite motif containing 26	-1.457	3.682
7587	NEU1	neuraminidase 1 (lysosomal sialidase)	-1.458	4.714
6180	SUV39H1	suppressor of variegation 3-9 homolog 1	-1.459	5.105
36192	RFWD3	ring finger and WD repeat domain 3	-1.461	4.116
11721	KLHL34	kelch like family member 34	-1.462	2.184
23345	OR2B2	olfactory receptor family 2 subfamily B member 2	-1.462	3.227
41413	ZNF696	zinc finger protein 696	-1.462	2.806
22671	LAPTM4B	lysosomal protein transmembrane 4 beta	-1.463	6.32
7136	PTTG3P	pituitary tumor-transforming 3, pseudogene	-1.463	4.702
42258	PDK1	pyruvate dehydrogenase kinase 1	-1.464	4.879
44896	PIGX	phosphatidylinositol glycan anchor biosynthesis class X	-1.465	3.564
37760	DLX4	distal-less homeobox 4	-1.467	2.966
11623	MLKL	mixed lineage kinase domain like	-1.468	3.025
14659	LRFN4	leucine rich repeat and fibronectin type III domain containing 4	-1.469	4.355
24738	ZIC4	Zic family member 4	-1.47	2.593
16256	HMOX1	heme oxygenase 1	-1.471	3.687
37189	HAGLROS	HAGLR opposite strand (non-protein coding)	-1.472	1.94
25583	INPP4A	inositol polyphosphate-4-phosphatase type I A	-1.472	3.671
13584	ZNF250	zinc finger protein 250	-1.472	3.494
28104	C17orf62	chromosome 17 open reading frame 62	-1.476	3.373
35516	CLCN4	chloride voltage-gated channel 4	-1.476	2.089
18566	HPS3	HPS3, biogenesis of lysosomal organelles complex 2 subunit 1	-1.476	2.128
22086	SLC25A33	solute carrier family 25 member 33	-1.477	3.903
32775	NCK1	NCK adaptor protein 1	-1.478	4.165
17971	NETO2	neuropilin and tolloid like 2	-1.478	1.981
13683	SSH2	slingshot protein phosphatase 2	-1.479	3.502
8135	STK38L	serine/threonine kinase 38 like	-1.482	3.607
19732	EBP	emopamil binding protein (sterol isomerase)	-1.483	5.652
17680	SHMT2	serine hydroxymethyltransferase 2	-1.483	7.758
8613	DOLPP1	dolichyldiphosphatase 1	-1.484	3.656
22990	FBXO45	F-box protein 45	-1.484	3.011
2393	CHM	CHM, Rab escort protein 1	-1.485	2.629
5367	FXYD5	FXYD domain containing ion transport regulator 5	-1.485	4.563
36782	HSPA14	heat shock protein family A (Hsp70) member 14	-1.485	7.709
22682	TNFRSF21	TNF receptor superfamily member 21	-1.486	2.549
22856	COTL1	coactosin like F-actin binding protein 1	-1.487	3.117
32359	DTYMK	deoxythymidylate kinase	-1.488	5.049
26448	EPRS	glutamyl-prolyl-tRNA synthetase	-1.489	7.391
28299	CBS	cystathionine-beta-synthase	-1.49	2.77
31944	RNASE1	ribonuclease A family member 1, pancreatic	-1.49	3.927
11739	TIMELESS	timeless circadian clock	-1.492	7.204
17013	UFD1L	ubiquitin fusion degradation 1 like (yeast)	-1.492	7.795
15947	EIF4E2	eukaryotic translation initiation factor 4E family member 2	-1.493	5.242
39741	PRRG1	proline rich and Gla domain 1	-1.493	2.427
14974	GEN1	GEN1, Holliday junction 5' flap endonuclease	-1.494	3.195
26099	TOR3A	torsin family 3 member A	-1.495	7.256
16842	C19orf12	chromosome 19 open reading frame 12	-1.496	3.303
9798	WDR91	WD repeat domain 91	-1.496	3.474
19246	SEH1L	SEH1 like nucleoporin	-1.497	4.296
23592	DPH2	DPH2 homolog	-1.498	5.2
38657	TPI1	triosephosphate isomerase 1	-1.499	5.976
42584	CDKL1	cyclin dependent kinase like 1	-1.5	2.259
18352	ERI1	exoribonuclease 1	-1.5	3.325
5099	KTI12	KTI12 chromatin associated homolog	-1.5	3.43
35150	LSM14B	LSM family member 14B	-1.501	2.597
32472	TUBA4A	tubulin alpha 4a	-1.501	11.741
2404	POP1	POP1 homolog, ribonuclease P/MRP subunit	-1.504	3.097
41524	PPM1G	protein phosphatase, Mg2+/Mn2+ dependent 1G	-1.504	5.591
11658	DDA1	DET1 and DDB1 associated 1	-1.506	7.006
13765	MANSC1	MANSC domain containing 1	-1.506	2.697
21971	SLFNL1	schlafen like 1	-1.506	2.823
8625	BRIX1	BRX1, biogenesis of ribosomes	-1.512	7.507
28297	RPA3	replication protein A3	-1.512	6.373
19596	TFRC	transferrin receptor	-1.512	5.128
25196	AGO2	argonaute 2, RISC catalytic component	-1.513	5.805
44278	HLA-DOB	major histocompatibility complex, class II, DO beta	-1.513	2.097
9695	CEBPA	CCAAT/enhancer binding protein alpha	-1.515	2.387
14738	CHCHD3	coiled-coil-helix-coiled-coil-helix domain containing 3	-1.515	4.488
13322	STRA13	stimulated by retinoic acid 13	-1.515	5.764
9954	C1orf74	chromosome 1 open reading frame 74	-1.516	2.585
10647	FUCA2	fucosidase, alpha-L- 2, plasma	-1.516	6.758
14273	HIST2H2BE	histone cluster 2, H2be	-1.516	3.214
7453	MIS18BP1	MIS18 binding protein 1	-1.517	4.35
30036	PFDN2	prefoldin subunit 2	-1.52	7.228
17900	IBSP	integrin binding sialoprotein	-1.521	4.356
5213	GABRD	gamma-aminobutyric acid type A receptor delta subunit	-1.522	2.386
21871	ZNF566	zinc finger protein 566	-1.522	3.759
8655	IKZF3	IKAROS family zinc finger 3	-1.523	3.508
30371	LSM2	LSM2 homolog, U6 small nuclear RNA and mRNA degradation associated	-1.523	3.783
18700	ASF1B	anti-silencing function 1B histone chaperone	-1.524	9.511
36549	QPRT	quinolinate phosphoribosyltransferase	-1.524	1.946
22129	TMEM38A	transmembrane protein 38A	-1.524	3.637
21516	MKRN3	makorin ring finger protein 3	-1.525	4.244
18731	SLC16A14	solute carrier family 16 member 14	-1.526	2.916
6645	LOC780529	uncharacterized LOC780529	-1.527	4.746
28668	NFXL1	nuclear transcription factor, X-box binding like 1	-1.528	4.086
12772	SYT11	synaptotagmin 11	-1.528	4.097
22555	TOMM34	translocase of outer mitochondrial membrane 34	-1.528	2.876
11251	APITD1	apoptosis-inducing, TAF9-like domain 1	-1.531	3.292
20103	HIST1H2AH	histone cluster 1, H2ah	-1.531	11.865
13702	MRPL15	mitochondrial ribosomal protein L15	-1.532	4.645
29516	ELOVL1	ELOVL fatty acid elongase 1	-1.533	5.737
10499	PPARD	peroxisome proliferator activated receptor delta	-1.534	2.516
32575	LGALS1	galectin 1	-1.535	4.206
6967	TAF4	TATA-box binding protein associated factor 4	-1.537	4.016
30920	ZNF567	zinc finger protein 567	-1.537	4.594
38819	IQCG	IQ motif containing G	-1.539	2.404
30389	NRIR///CMPK2	negative regulator of interferon response (non-protein coding)///cytidine/uridine monophosphate kinase 2	-1.539	2.166
42048	SEC61G	Sec61 translocon gamma subunit	-1.541	5.68
12343	GAPVD1	GTPase activating protein and VPS9 domains 1	-1.542	3.592
27789	SLC35F2	solute carrier family 35 member F2	-1.542	3.025
9796	CEP295	centrosomal protein 295	-1.543	5.03
35120	GTPBP4	GTP binding protein 4	-1.543	7.892
15821	KCNG1	potassium voltage-gated channel modifier subfamily G member 1	-1.543	2.51
36406	APOC1	apolipoprotein C1	-1.544	1.881
6074	BACE2	beta-site APP-cleaving enzyme 2	-1.545	3.467
5041	SAC3D1	SAC3 domain containing 1	-1.546	8.471
11485	HAUS8	HAUS augmin like complex subunit 8	-1.547	4.36
41233	ILF2	interleukin enhancer binding factor 2	-1.548	6.832
19335	GPRC5A	G protein-coupled receptor class C group 5 member A	-1.549	3.31
24676	MMP13	matrix metallopeptidase 13	-1.55	3.627
21421	PSME3	proteasome activator subunit 3	-1.55	3.015
24907	HIST1H2AK	histone cluster 1, H2ak	-1.551	13.036
17391	PDSS1	prenyl (decaprenyl) diphosphate synthase, subunit 1	-1.552	4.3
28103	SKP2	S-phase kinase-associated protein 2, E3 ubiquitin protein ligase	-1.552	5.017
43809	LOC284072	uncharacterized LOC284072	-1.553	5.117
5952	IFI6	interferon alpha inducible protein 6	-1.554	3.784
39661	LGMN	legumain	-1.554	4.184
4125	TUBB4B	tubulin beta 4B class IVb	-1.556	7.405
10541	ENY2	ENY2, transcription and export complex 2 subunit	-1.558	7.449
8702	MYO9B	myosin IXB	-1.558	3.153
39339	UHRF1BP1	UHRF1 binding protein 1	-1.558	3.819
18043	RIOK3	RIO kinase 3	-1.559	3.917
4658	GSTA1	glutathione S-transferase alpha 1	-1.56	2.705
30801	HIST1H3C	histone cluster 1, H3c	-1.561	6.908
15134	IDI1	isopentenyl-diphosphate delta isomerase 1	-1.561	4.342
26416	NUDT1	nudix hydrolase 1	-1.561	7.266
34757	TNFAIP6	TNF alpha induced protein 6	-1.562	4.704
21766	DLX1	distal-less homeobox 1	-1.564	1.898
6402	MRPL44	mitochondrial ribosomal protein L44	-1.566	4.361
12291	SOCS3	suppressor of cytokine signaling 3	-1.566	3.666
2585	BYSL	bystin like	-1.567	5.249
3733	SLC45A4	solute carrier family 45 member 4	-1.568	3.87
23083	ADAR	adenosine deaminase, RNA specific	-1.569	4.007
21664	INSIG1	insulin induced gene 1	-1.569	4.194
6142	NOX4	NADPH oxidase 4	-1.569	3.982
14959	CTLA4	cytotoxic T-lymphocyte associated protein 4	-1.57	3.526
43871	MTBP	MDM2 binding protein	-1.57	4.062
20140	AFG3L2	AFG3 like matrix AAA peptidase subunit 2	-1.571	2.722
14488	TSPAN33	tetraspanin 33	-1.572	2.699
43432	EPN3	epsin 3	-1.574	2.079
5222	PSIP1	PC4 and SFRS1 interacting protein 1	-1.575	3.784
39458	TMEM65	transmembrane protein 65	-1.575	5.97
14887	TPI1P2	triosephosphate isomerase 1 pseudogene 2	-1.575	7.953
42002	BARD1	BRCA1 associated RING domain 1	-1.576	6.199
44392	NDRG1	N-myc downstream regulated 1	-1.577	3.979
2563	XG	Xg blood group	-1.577	4.612
16544	ACAP2	ArfGAP with coiled-coil, ankyrin repeat and PH domains 2	-1.578	3.289
31126	BOLA2B	bolA family member 2B	-1.579	7.257
29917	C1orf122	chromosome 1 open reading frame 122	-1.579	6.007
2035	KPNA2	karyopherin subunit alpha 2	-1.579	9.523
43261	CARHSP1	calcium regulated heat stable protein 1	-1.581	5.921
17368	HIST3H2BB	histone cluster 3, H2bb	-1.581	11.776
9191	SLC39A4	solute carrier family 39 member 4	-1.582	4.498
42931	CGREF1	cell growth regulator with EF-hand domain 1	-1.583	2.132
18993	FNDC3B	fibronectin type III domain containing 3B	-1.583	3.903
33645	SPOCD1	SPOC domain containing 1	-1.583	4.53
32350	GCH1	GTP cyclohydrolase 1	-1.584	2.032
20804	KIAA1804	mixed lineage kinase 4	-1.584	2.253
44665	RELT	RELT tumor necrosis factor receptor	-1.585	3.781
1387	APOLD1	apolipoprotein L domain containing 1	-1.586	4.054
1228	ABHD13	abhydrolase domain containing 13	-1.587	2.665
35307	BORCS5	BLOC-1 related complex subunit 5	-1.587	2.926
16795	DPH3	diphthamide biosynthesis 3	-1.587	5.843
27558	PSPH	phosphoserine phosphatase	-1.589	3.653
7347	MRPL11	mitochondrial ribosomal protein L11	-1.59	5.359
14189	SLF2	SMC5-SMC6 complex localization factor 2	-1.59	3.425
33100	NUP155	nucleoporin 155	-1.591	5.996
18442	ST6GAL1	ST6 beta-galactoside alpha-2,6-sialyltransferase 1	-1.593	4.597
15120	C9orf40	chromosome 9 open reading frame 40	-1.596	2.942
40590	KLHL18	kelch like family member 18	-1.596	2.133
16899	VCAM1	vascular cell adhesion molecule 1	-1.596	2.581
33937	DGKH	diacylglycerol kinase eta	-1.598	7.096
36033	C4orf46	chromosome 4 open reading frame 46	-1.599	2.6
13172	HTATIP2	HIV-1 Tat interactive protein 2	-1.602	4.681
22073	MCOLN2	mucolipin 2	-1.602	2.851
41758	BAIAP2L1	BAI1 associated protein 2 like 1	-1.603	3.106
39676	LCORL	ligand dependent nuclear receptor corepressor like	-1.603	3.078
35147	RASSF2	Ras association domain family member 2	-1.603	2.306
38521	RMI1	RecQ mediated genome instability 1	-1.604	6.172
23963	SVOPL	SVOP like	-1.604	2.521
38836	SAMHD1	SAM and HD domain containing deoxynucleoside triphosphate triphosphohydrolase 1	-1.605	2.564
40277	RIBC2	RIB43A domain with coiled-coils 2	-1.606	3.744
6543	HOTAIR	HOX transcript antisense RNA	-1.609	2.328
4244	SLCO4A1	solute carrier organic anion transporter family member 4A1	-1.609	4.876
20770	ADGRG2	adhesion G protein-coupled receptor G2	-1.61	3.316
22005	TOMM5	translocase of outer mitochondrial membrane 5	-1.611	7.194
14120	MGC2889	uncharacterized protein MGC2889	-1.612	3.843
15100	GJC1	gap junction protein gamma 1	-1.615	4.497
23150	USP41	ubiquitin specific peptidase 41	-1.615	2.388
30715	COCH	cochlin	-1.616	2.141
5653	PDIA5	protein disulfide isomerase family A member 5	-1.616	5.018
7419	GUCY1A2	guanylate cyclase 1 soluble subunit alpha 2	-1.621	5.043
21062	VBP1	VHL binding protein 1	-1.621	6.358
34922	NIPSNAP1	nipsnap homolog 1 (C. elegans)	-1.622	2.616
16090	AP2S1	adaptor related protein complex 2 sigma 1 subunit	-1.623	3.92
26323	TMEM45A	transmembrane protein 45A	-1.623	3.002
3047	ARPC5L	actin related protein 2/3 complex subunit 5 like	-1.624	5.665
6901	MED30	mediator complex subunit 30	-1.624	3.712
39364	PGM2	phosphoglucomutase 2	-1.625	5.365
15194	SMC6	structural maintenance of chromosomes 6	-1.628	6.362
41079	CKAP5	cytoskeleton associated protein 5	-1.629	6.766
14925	EMC8	ER membrane protein complex subunit 8	-1.629	4.147
33195	METRNL	meteorin like, glial cell differentiation regulator	-1.63	5.787
10612	NNT	nicotinamide nucleotide transhydrogenase	-1.63	2.415
36712	FAM49B	family with sequence similarity 49 member B	-1.632	8.226
44868	HMGA1	high mobility group AT-hook 1	-1.632	3.538
25575	COL1A2	collagen type I alpha 2 chain	-1.633	2.809
1313	TALDO1	transaldolase 1	-1.633	8.533
15789	LRP12	LDL receptor related protein 12	-1.634	2.399
12416	CORO1C	coronin 1C	-1.638	5.137
34309	FOXN2	forkhead box N2	-1.638	5.791
39343	SNN	stannin	-1.64	2.787
8728	HENMT1	HEN1 methyltransferase homolog 1	-1.641	8.863
22330	LIN9	lin-9 DREAM MuvB core complex component	-1.642	5.61
35505	POLA2	DNA polymerase alpha 2, accessory subunit	-1.645	5.082
5101	AP3M2	adaptor related protein complex 3 mu 2 subunit	-1.647	3.11
7742	HIST3H2A	histone cluster 3, H2a	-1.649	10.903
2796	OVOS2	ovostatin 2	-1.649	2.763
25394	PRPS2	phosphoribosyl pyrophosphate synthetase 2	-1.649	3.599
39592	BCAT1	branched chain amino acid transaminase 1	-1.652	4.721
43615	ZUFSP	zinc finger with UFM1 specific peptidase domain	-1.652	6.076
14992	VEGFA	vascular endothelial growth factor A	-1.653	3.869
34877	HIST1H4C	histone cluster 1, H4c	-1.655	6.991
42045	LBR	lamin B receptor	-1.655	6.744
27912	PSMD2	proteasome 26S subunit, non-ATPase 2	-1.655	5.461
13491	PRIM2	primase (DNA) subunit 2	-1.656	6.22
5190	ADCY7	adenylate cyclase 7	-1.659	4.284
13676	AMER1	APC membrane recruitment protein 1	-1.659	5.806
7644	CXCL8	C-X-C motif chemokine ligand 8	-1.659	3.366
21752	NCAPD2	non-SMC condensin I complex subunit D2	-1.659	3.782
14590	PFDN6	prefoldin subunit 6	-1.659	6.842
26751	TUBB4A	tubulin beta 4A class IVa	-1.659	9.044
38639	EFR3B	EFR3 homolog B	-1.662	1.88
1121	GPR158	G protein-coupled receptor 158	-1.667	2.881
38252	PPIL1	peptidylprolyl isomerase like 1	-1.667	5.395
20748	LOXL2	lysyl oxidase like 2	-1.668	3.218
38445	RLBP1	retinaldehyde binding protein 1	-1.668	4.351
8433	CCL8	C-C motif chemokine ligand 8	-1.669	2.833
4545	C12orf75	chromosome 12 open reading frame 75	-1.67	2.041
12444	UBE2S	ubiquitin conjugating enzyme E2 S	-1.67	8.288
35877	OBP2B	odorant binding protein 2B	-1.671	2.625
2450	STARD4	StAR related lipid transfer domain containing 4	-1.671	2.942
43820	RTKN2	rhotekin 2	-1.672	4.571
39863	HIST1H3D	histone cluster 1, H3d	-1.676	8.711
6278	PHF5A	PHD finger protein 5A	-1.676	7.819
30857	POU4F1	POU class 4 homeobox 1	-1.677	2.749
27189	OAS2	2'-5'-oligoadenylate synthetase 2	-1.679	1.94
1048	TUBB2A	tubulin beta 2A class IIa	-1.679	8.521
12567	GALNT14	polypeptide N-acetylgalactosaminyltransferase 14	-1.68	2.586
37739	CD84	CD84 molecule	-1.681	2.29
1474	CKAP2	cytoskeleton associated protein 2	-1.683	4.873
25088	MTCH2	mitochondrial carrier 2	-1.683	8.202
27739	UGT8	UDP glycosyltransferase 8	-1.686	2.267
28731	IMPA2	inositol monophosphatase 2	-1.689	5.115
8413	TMEM70	transmembrane protein 70	-1.69	6.749
24281	SEPT11	septin 11	-1.691	6.006
44429	CHST6	carbohydrate sulfotransferase 6	-1.692	4.029
10655	GAL	galanin and GMAP prepropeptide	-1.694	2.279
36335	DEPDC1	DEP domain containing 1	-1.696	8.591
42344	STAT1	signal transducer and activator of transcription 1	-1.697	4.331
22608	WDHD1	WD repeat and HMG-box DNA binding protein 1	-1.699	6.164
39770	TOMM22	translocase of outer mitochondrial membrane 22	-1.701	6.398
29486	ADAMTS14	ADAM metallopeptidase with thrombospondin type 1 motif 14	-1.703	6.117
14669	PDZK1IP1	PDZK1 interacting protein 1	-1.706	2.027
40153	BCL2A1	BCL2 related protein A1	-1.707	5.427
7948	ARL8A	ADP ribosylation factor like GTPase 8A	-1.708	4.745
11685	INTS7	integrator complex subunit 7	-1.708	3.797
27288	BOP1	block of proliferation 1	-1.711	7.143
43540	ADCYAP1	adenylate cyclase activating polypeptide 1	-1.714	2.036
11216	H2AFZ	H2A histone family member Z	-1.715	11.593
32060	SPECC1	sperm antigen with calponin homology and coiled-coil domains 1	-1.718	3.248
21436	MTFR2	mitochondrial fission regulator 2	-1.719	6.151
38210	B4GALT3	beta-1,4-galactosyltransferase 3	-1.722	6.114
26102	HIST1H4L	histone cluster 1, H4l	-1.722	7.84
11023	NUP210	nucleoporin 210	-1.723	3.825
5534	TMSB10	thymosin beta 10	-1.723	10.49
15180	MARK1	microtubule affinity regulating kinase 1	-1.724	2.24
21454	PPP1R16A	protein phosphatase 1 regulatory subunit 16A	-1.725	5.337
21758	SOX6	SRY-box 6	-1.725	2.493
20421	C16orf95	chromosome 16 open reading frame 95	-1.727	4.62
31684	FOXF2	forkhead box F2	-1.728	2.201
12310	ADAM8	ADAM metallopeptidase domain 8	-1.729	2.948
35257	C16orf59	chromosome 16 open reading frame 59	-1.732	6.628
24687	SLC30A7	solute carrier family 30 member 7	-1.732	6.831
36627	LMNB2	lamin B2	-1.733	8.631
31123	CMC2	C-X9-C motif containing 2	-1.734	8.403
14144	MRGBP	MRG/MORF4L binding protein	-1.734	3.518
29103	SCARB1	scavenger receptor class B member 1	-1.737	3.42
14577	ABRACL	ABRA C-terminal like	-1.74	7.415
30093	AP1S2	adaptor related protein complex 1 sigma 2 subunit	-1.742	3.478
32602	PYCR1	pyrroline-5-carboxylate reductase 1	-1.743	6.437
23226	ARMC9	armadillo repeat containing 9	-1.746	3.851
6000	GPR180	G protein-coupled receptor 180	-1.747	3.468
10291	CPVL	carboxypeptidase, vitellogenic like	-1.751	2.603
5405	NPR3	natriuretic peptide receptor 3	-1.753	3.027
16982	ABCC4	ATP binding cassette subfamily C member 4	-1.756	3.026
28197	IFIT3	interferon induced protein with tetratricopeptide repeats 3	-1.756	2.249
11823	LCT	lactase	-1.76	3
18358	PSMA7	proteasome subunit alpha 7	-1.761	9.918
7243	MFAP5	microfibrillar associated protein 5	-1.763	3.804
13338	ZDHHC3	zinc finger DHHC-type containing 3	-1.768	4.433
18943	LOC441666	zinc finger protein 91 pseudogene	-1.77	2.402
24234	RPN1	ribophorin I	-1.77	5.438
8946	SGO1	shugoshin 1	-1.77	4.434
2090	SLC7A5	solute carrier family 7 member 5	-1.77	6.635
34040	FOXRED2	FAD dependent oxidoreductase domain containing 2	-1.773	3.318
36272	ZNF71	zinc finger protein 71	-1.774	3.607
28583	SPON2	spondin 2	-1.779	3.128
752	SUSD5	sushi domain containing 5	-1.779	2.367
22565	PCNA	proliferating cell nuclear antigen	-1.78	7.627
33020	PSMD14	proteasome 26S subunit, non-ATPase 14	-1.78	10.215
17088	XRCC2	X-ray repair cross complementing 2	-1.781	5.791
20156	KARS	lysyl-tRNA synthetase	-1.783	5.011
38312	PGM3	phosphoglucomutase 3	-1.783	4.667
25053	DAPK1	death associated protein kinase 1	-1.784	3.816
26837	TDP1	tyrosyl-DNA phosphodiesterase 1	-1.784	6.767
3893	POLQ	DNA polymerase theta	-1.786	7.434
13130	STK38	serine/threonine kinase 38	-1.786	5.725
17853	GBP1	guanylate binding protein 1	-1.788	2.648
37063	ACER3	alkaline ceramidase 3	-1.789	4.282
20575	LRP8	LDL receptor related protein 8	-1.789	4.997
30596	CLPTM1L	CLPTM1 like	-1.791	5.416
31871	GLRX2	glutaredoxin 2	-1.791	4.679
36197	ADGRG6	adhesion G protein-coupled receptor G6	-1.792	3.731
5919	LIMK1	LIM domain kinase 1	-1.795	6.261
42011	FAM89A	family with sequence similarity 89 member A	-1.796	3.083
31153	SSX2IP	SSX family member 2 interacting protein	-1.797	5.829
33560	YEATS2	YEATS domain containing 2	-1.797	7.029
26274	EEF1E1	eukaryotic translation elongation factor 1 epsilon 1	-1.798	4.904
41052	PLIN2	perilipin 2	-1.798	5.209
44067	VOPP1	vesicular, overexpressed in cancer, prosurvival protein 1	-1.798	4.34
27382	WDR76	WD repeat domain 76	-1.798	4.977
21514	BID	BH3 interacting domain death agonist	-1.799	4.485
7388	C2orf54	chromosome 2 open reading frame 54	-1.799	4.467
32698	CDK8	cyclin dependent kinase 8	-1.8	4.302
21733	MRPS7	mitochondrial ribosomal protein S7	-1.803	4.881
2715	ASAP1	ArfGAP with SH3 domain, ankyrin repeat and PH domain 1	-1.806	5.663
22260	KIAA1211	KIAA1211	-1.806	3.382
34671	PRICKLE1	prickle planar cell polarity protein 1	-1.806	3.995
8287	HAVCR2	hepatitis A virus cellular receptor 2	-1.808	2.294
18571	TTLL4	tubulin tyrosine ligase like 4	-1.808	3.317
24573	ALDH1L2	aldehyde dehydrogenase 1 family member L2	-1.809	2.805
37841	E2F3	E2F transcription factor 3	-1.81	6.822
8714	PPP1R14C	protein phosphatase 1 regulatory inhibitor subunit 14C	-1.811	3.068
11509	GPSM2	G-protein signaling modulator 2	-1.812	4.2
21550	PRELID3A	PRELI domain containing 3A	-1.812	4.712
41066	SCNM1	sodium channel modifier 1	-1.812	5.427
879	PLK4	polo like kinase 4	-1.813	4.418
27204	ISG20	interferon stimulated exonuclease gene 20	-1.814	4.372
2171	AUNIP	aurora kinase A and ninein interacting protein	-1.815	5.141
7582	FOXD2	forkhead box D2	-1.815	3.426
18958	MCM6	minichromosome maintenance complex component 6	-1.818	6.764
10381	MMP12	matrix metallopeptidase 12	-1.819	1.99
31937	CNIH4	cornichon family AMPA receptor auxiliary protein 4	-1.822	9.486
16479	IL20RB	interleukin 20 receptor subunit beta	-1.822	2.592
8138	IFITM1	interferon induced transmembrane protein 1	-1.823	2.075
41727	LYPD1	LY6/PLAUR domain containing 1	-1.823	3.463
20788	MRPS17	mitochondrial ribosomal protein S17	-1.823	8.121
36906	DESI2	desumoylating isopeptidase 2	-1.824	5.471
15671	LMO4	LIM domain only 4	-1.829	3.794
10960	ARHGDIA	Rho GDP dissociation inhibitor alpha	-1.833	6.516
7541	ENSA	endosulfine alpha	-1.836	8.769
42983	RFC4	replication factor C subunit 4	-1.836	6.442
42694	CD38	CD38 molecule	-1.837	3.948
4720	RANBP1	RAN binding protein 1	-1.84	8.354
41378	IL21R	interleukin 21 receptor	-1.844	1.9
28844	ULBP2	UL16 binding protein 2	-1.844	4.581
8921	MNX1	motor neuron and pancreas homeobox 1	-1.847	2.703
38980	MCUB	mitochondrial calcium uniporter dominant negative beta subunit	-1.848	5.733
31687	RGS1	regulator of G-protein signaling 1	-1.856	2.781
33448	MKI67	marker of proliferation Ki-67	-1.858	4.646
14163	CDCA7	cell division cycle associated 7	-1.864	7.352
26104	DDX39A	DEAD-box helicase 39A	-1.866	7.882
13073	RASSF4	Ras association domain family member 4	-1.869	2.372
9844	RHPN1-AS1	RHPN1 antisense RNA 1 (head to head)	-1.87	4.707
2179	LOX	lysyl oxidase	-1.871	3.362
21047	ADAM19	ADAM metallopeptidase domain 19	-1.875	2.234
32625	RECQL4	RecQ like helicase 4	-1.877	10.002
12571	CD99	CD99 molecule	-1.878	7.018
35570	ZC3H18	zinc finger CCCH-type containing 18	-1.88	6.3
20068	RHBDF2	rhomboid 5 homolog 2	-1.882	5.563
7592	SUV39H2	suppressor of variegation 3-9 homolog 2	-1.886	6.853
30297	IFI30	IFI30, lysosomal thiol reductase	-1.888	5.109
25379	IL32	interleukin 32	-1.891	2.051
15293	HOXB7	homeobox B7	-1.893	5.748
5202	PRR5L	proline rich 5 like	-1.894	2.378
21598	ZNF707	zinc finger protein 707	-1.894	4.402
18136	IDH2	isocitrate dehydrogenase (NADP(+)) 2, mitochondrial	-1.895	4.906
33232	ANGPT1	angiopoietin 1	-1.897	4.2
23632	FANCE	Fanconi anemia complementation group E	-1.897	4.304
38975	FAP	fibroblast activation protein alpha	-1.899	2.346
35006	ICAM1	intercellular adhesion molecule 1	-1.899	4.875
39463	BCL6B	B-cell CLL/lymphoma 6B	-1.905	3.23
20269	HIST2H3A///HIST2H3C	histone cluster 2, H3a///histone cluster 2, H3c	-1.905	2.591
7613	CENPP	centromere protein P	-1.906	5.434
3201	ATP1B3	ATPase Na+/K+ transporting subunit beta 3	-1.908	6.279
20878	ASS1	argininosuccinate synthase 1	-1.91	4.634
44578	TMSB15B	thymosin beta 15B	-1.911	4.141
39703	KLHDC4	kelch domain containing 4	-1.912	4.717
42857	DLX6	distal-less homeobox 6	-1.916	4.415
31685	PDXDC1	pyridoxal dependent decarboxylase domain containing 1	-1.916	6.748
7617	KLHL6	kelch like family member 6	-1.917	1.92
44434	MASTL	microtubule associated serine/threonine kinase like	-1.919	6.267
36856	HIST2H2AB	histone cluster 2, H2ab	-1.922	10.877
9368	SLC36A4	solute carrier family 36 member 4	-1.924	3.378
35489	SKA2	spindle and kinetochore associated complex subunit 2	-1.925	5.194
41341	C19orf53	chromosome 19 open reading frame 53	-1.927	7.096
7537	SERPINH1	serpin family H member 1	-1.928	3.968
27286	HIST1H2BC	histone cluster 1, H2bc	-1.929	11.963
12039	CLEC7A	C-type lectin domain family 7 member A	-1.931	5.099
32791	CTSC	cathepsin C	-1.931	4.137
38590	RAD54B	RAD54 homolog B (S. cerevisiae)	-1.933	6.01
38205	CCNB2	cyclin B2	-1.935	6.667
5666	FRMD3	FERM domain containing 3	-1.935	2.167
30758	MTARC1	mitochondrial amidoxime reducing component 1	-1.94	2.718
18343	YWHAG	tyrosine 3-monooxygenase/tryptophan 5-monooxygenase activation protein gamma	-1.941	6.818
37592	MALL	mal, T-cell differentiation protein like	-1.946	3.215
10965	SRGAP2	SLIT-ROBO Rho GTPase activating protein 2	-1.948	5.14
19019	TBC1D31	TBC1 domain family member 31	-1.951	3.898
245	SHOX2	short stature homeobox 2	-1.957	2.577
33363	NMB	neuromedin B	-1.96	3.852
41289	ANKS6	ankyrin repeat and sterile alpha motif domain containing 6	-1.962	4.327
31653	HOMER3	homer scaffolding protein 3	-1.963	6.649
6216	RFC2	replication factor C subunit 2	-1.97	6.77
34593	RNFT2	ring finger protein, transmembrane 2	-1.972	3.901
7171	MSL3P1	male-specific lethal 3 homolog (Drosophila) pseudogene 1	-1.973	3.233
14006	KIAA1549L	KIAA1549 like	-1.975	1.969
32537	FNDC1	fibronectin type III domain containing 1	-1.976	3.839
27805	MSR1	macrophage scavenger receptor 1	-1.979	1.914
23957	TP53INP2	tumor protein p53 inducible nuclear protein 2	-1.981	4.122
7533	BPNT1	3'(2'), 5'-bisphosphate nucleotidase 1	-1.986	4.862
24948	SCRG1	stimulator of chondrogenesis 1	-1.986	2.65
18798	NCF2	neutrophil cytosolic factor 2	-1.987	3.089
29729	HIST1H1E	histone cluster 1, H1e	-1.99	8.594
25344	TBC1D7	TBC1 domain family member 7	-1.992	5.614
41040	PRDX4	peroxiredoxin 4	-1.993	10.595
34737	HIST1H2BN	histone cluster 1, H2bn	-1.994	13.727
21955	COLGALT1	collagen beta(1-O)galactosyltransferase 1	-1.996	5.974
30742	FABP5	fatty acid binding protein 5	-1.997	4.304
2019	GMPS	guanine monophosphate synthase	-2.002	10.908
25303	FEN1	flap structure-specific endonuclease 1	-2.004	6.545
20188	PXDN	peroxidasin	-2.004	2.435
37612	COL3A1	collagen type III alpha 1 chain	-2.007	2.81
44078	PDE4D	phosphodiesterase 4D	-2.007	3.969
7680	HRH1	histamine receptor H1	-2.011	3.621
21263	CD163	CD163 molecule	-2.015	3.143
33185	CHAF1A	chromatin assembly factor 1 subunit A	-2.016	6.408
27972	TMEM158	transmembrane protein 158 (gene/pseudogene)	-2.016	3.275
35279	KIAA1524	KIAA1524	-2.02	4.907
31255	MX1	MX dynamin like GTPase 1	-2.032	3.277
15966	SLFN11	schlafen family member 11	-2.034	3.806
9917	VMA21	VMA21 vacuolar H+-ATPase homolog (S. cerevisiae)	-2.034	9.497
16927	HIST1H2BJ	histone cluster 1, H2bj	-2.036	13.125
41979	CCL13	C-C motif chemokine ligand 13	-2.037	1.968
17884	LAGE3	L antigen family member 3	-2.038	7.681
11921	FOXC1	forkhead box C1	-2.04	2.678
43071	RRM2	ribonucleotide reductase regulatory subunit M2	-2.04	7.312
17916	TCF19	transcription factor 19	-2.04	5.836
27183	CHML	CHM like, Rab escort protein 2	-2.042	5.199
34776	KNSTRN	kinetochore localized astrin/SPAG5 binding protein	-2.043	6.769
24991	CHEK2	checkpoint kinase 2	-2.05	6.45
36160	UBASH3B	ubiquitin associated and SH3 domain containing B	-2.053	4.5
27234	NUDT5	nudix hydrolase 5	-2.054	5.205
43677	HIST1H2AM	histone cluster 1, H2am	-2.055	13.234
25067	HIST1H2AG	histone cluster 1, H2ag	-2.059	7.514
43648	HIST1H2BF	histone cluster 1, H2bf	-2.061	13.695
21725	PIM1	Pim-1 proto-oncogene, serine/threonine kinase	-2.063	6.133
29244	ATAD2	ATPase family, AAA domain containing 2	-2.064	5.927
35641	BCL2L12///IRF3	BCL2 like 12///interferon regulatory factor 3	-2.069	5.807
24147	HK2	hexokinase 2	-2.07	3.604
36483	VCAN	versican	-2.071	2.993
33818	HELLS	helicase, lymphoid-specific	-2.074	5.476
43470	HIST1H2BD	histone cluster 1, H2bd	-2.074	13.272
15202	CDC25B	cell division cycle 25B	-2.076	4.339
10725	HIST1H1C	histone cluster 1, H1c	-2.08	4.057
14097	PNP	purine nucleoside phosphorylase	-2.08	7.164
18850	COQ2	coenzyme Q2, polyprenyltransferase	-2.081	4.001
17310	SKA1	spindle and kinetochore associated complex subunit 1	-2.082	5.804
31326	BRIP1	BRCA1 interacting protein C-terminal helicase 1	-2.083	6.582
8805	ZBED2	zinc finger BED-type containing 2	-2.085	5.195
12634	LY96	lymphocyte antigen 96	-2.087	3.724
33862	B3GNT5	UDP-GlcNAc:betaGal beta-1,3-N-acetylglucosaminyltransferase 5	-2.091	4.635
36273	C20orf24	chromosome 20 open reading frame 24	-2.096	12.333
14018	KIAA0101	KIAA0101	-2.096	7.222
39761	P2RY1	purinergic receptor P2Y1	-2.098	3.144
3536	ATP6V1C2	ATPase H+ transporting V1 subunit C2	-2.099	3.265
4647	GRB14	growth factor receptor bound protein 14	-2.101	1.949
21412	HSD17B6	hydroxysteroid 17-beta dehydrogenase 6	-2.101	5.178
40585	HIST1H2BE	histone cluster 1, H2be	-2.106	13.895
26466	PARPBP	PARP1 binding protein	-2.11	6.409
34604	CKAP2L	cytoskeleton associated protein 2 like	-2.117	9.045
29500	TTC13	tetratricopeptide repeat domain 13	-2.117	6.221
5232	LHX2	LIM homeobox 2	-2.12	5.914
22214	PTX3	pentraxin 3	-2.121	1.904
7127	HPSE	heparanase	-2.123	4.045
27868	TMEM56	transmembrane protein 56	-2.124	5.449
35980	GINS2	GINS complex subunit 2	-2.125	4.26
10824	MAPK4	mitogen-activated protein kinase 4	-2.129	2.989
10000	HIST2H2BD	histone cluster 2, H2bd (pseudogene)	-2.131	13.849
19002	SHCBP1	SHC binding and spindle associated 1	-2.132	6.108
6178	STMN1	stathmin 1	-2.132	7.38
26132	HIST1H2BL	histone cluster 1, H2bl	-2.135	13.589
19192	NCAPG2	non-SMC condensin II complex subunit G2	-2.146	6.739
43109	RACGAP1	Rac GTPase activating protein 1	-2.146	11.605
13752	LOC100506125	uncharacterized LOC100506125	-2.147	3.678
24597	SCD	stearoyl-CoA desaturase	-2.148	4.48
29934	PMCH	pro-melanin concentrating hormone	-2.15	6.782
44976	CENPI	centromere protein I	-2.152	5.767
22199	PIR	pirin	-2.153	7.129
21494	CSTB	cystatin B	-2.154	10.035
38997	TYMSOS	TYMS opposite strand	-2.155	5.007
5389	CALB2	calbindin 2	-2.156	3.534
2876	HIST1H2AD	histone cluster 1, H2ad	-2.161	10.074
41238	MCM2	minichromosome maintenance complex component 2	-2.163	10.14
25806	ADD2	adducin 2	-2.171	1.953
43187	NEURL1B	neuralized E3 ubiquitin protein ligase 1B	-2.171	6.968
31335	PCSK9	proprotein convertase subtilisin/kexin type 9	-2.173	3.083
16102	GZMB	granzyme B	-2.175	3.033
13208	HIST1H1D	histone cluster 1, H1d	-2.183	8.877
15833	HIST1H2BO	histone cluster 1, H2bo	-2.183	12.831
2662	GPC4	glypican 4	-2.185	3.041
8126	MDK	midkine (neurite growth-promoting factor 2)	-2.19	5.115
37473	NACC2	NACC family member 2	-2.194	3.729
30130	MYBL1	MYB proto-oncogene like 1	-2.197	3.878
17390	CDKN2D	cyclin dependent kinase inhibitor 2D	-2.199	6.069
15699	MMP3	matrix metallopeptidase 3	-2.199	3.927
1314	NKG7	natural killer cell granule protein 7	-2.199	2.324
22641	LOC100419920	ankyrin repeat domain 33B pseudogene	-2.201	6.596
25187	DSN1	DSN1 homolog, MIS12 kinetochore complex component	-2.203	8.097
34929	CDKN2B	cyclin dependent kinase inhibitor 2B	-2.205	3.333
13137	CEP76	centrosomal protein 76	-2.208	6.512
25252	FOXK2	forkhead box K2	-2.216	5.626
38093	CENPE	centromere protein E	-2.217	8.907
7003	MRPL13	mitochondrial ribosomal protein L13	-2.218	10.163
6806	CDC7	cell division cycle 7	-2.221	8.761
32661	TTYH3	tweety family member 3	-2.223	6.19
5082	TRIP13	thyroid hormone receptor interactor 13	-2.224	8.26
41584	PSAT1	phosphoserine aminotransferase 1	-2.226	4.052
33345	SECTM1	secreted and transmembrane 1	-2.228	3.461
42815	ZNF367	zinc finger protein 367	-2.228	8.708
7470	RPRML	reprimo like	-2.234	1.941
4258	PTTG2	pituitary tumor-transforming 2	-2.239	7.429
4399	TMEFF1	transmembrane protein with EGF like and two follistatin like domains 1	-2.242	4.161
29314	ASB9	ankyrin repeat and SOCS box containing 9	-2.246	6.577
13605	ECE2	endothelin converting enzyme 2	-2.246	7.914
40660	HIST1H2BB	histone cluster 1, H2bb	-2.246	10.788
9527	SMC4	structural maintenance of chromosomes 4	-2.248	11.608
20418	NUDCD1	NudC domain containing 1	-2.25	4.569
22224	COL1A1	collagen type I alpha 1 chain	-2.255	3.72
27102	SQLE	squalene epoxidase	-2.256	7.816
29237	HIST1H2BM	histone cluster 1, H2bm	-2.259	12.563
2426	GRPEL2	GrpE like 2, mitochondrial	-2.264	8.769
16345	CAMK1D	calcium/calmodulin dependent protein kinase ID	-2.269	4.402
40828	GSG2	germ cell associated 2, haspin	-2.27	5.113
5798	LTBP1	latent transforming growth factor beta binding protein 1	-2.27	4.78
39532	GPRIN1	G protein regulated inducer of neurite outgrowth 1	-2.272	5.297
39677	MMP10	matrix metallopeptidase 10	-2.277	2.118
34351	PXDNL	peroxidasin like	-2.279	4.955
26550	PMCHL1	pro-melanin concentrating hormone like 1 (pseudogene)	-2.285	6.531
4445	HIST1H2BI	histone cluster 1, H2bi	-2.291	13.413
39354	RPP25	ribonuclease P/MRP subunit p25	-2.299	3.779
20471	TPRXL	tetrapeptide repeat homeobox like	-2.306	3.692
2001	CDKN2C	cyclin dependent kinase inhibitor 2C	-2.307	6.493
5863	WNT11	Wnt family member 11	-2.307	2.01
39692	KIF15	kinesin family member 15	-2.312	8.985
34512	RAB35	RAB35, member RAS oncogene family	-2.322	5.041
23183	MARS	methionyl-tRNA synthetase	-2.329	8.418
30321	HIST1H2AB	histone cluster 1, H2ab	-2.333	10.789
9597	RMI2	RecQ mediated genome instability 2	-2.333	9.133
40394	EPPK1	epiplakin 1	-2.338	4.274
13803	SLC16A1	solute carrier family 16 member 1	-2.338	3.969
19646	TIPIN	TIMELESS interacting protein	-2.341	6.587
8125	SEPT3	septin 3	-2.346	3.589
22940	HIST1H2BH	histone cluster 1, H2bh	-2.347	12.424
7529	IDO1	indoleamine 2,3-dioxygenase 1	-2.349	2.188
9379	SLC2A1	solute carrier family 2 member 1	-2.349	6.924
38712	VGLL1	vestigial like family member 1	-2.351	2.296
32936	INCENP	inner centromere protein	-2.353	5.702
9639	ZWILCH	zwilch kinetochore protein	-2.354	5.943
5629	CHAF1B	chromatin assembly factor 1 subunit B	-2.36	6.405
40459	HSPA13	heat shock protein family A (Hsp70) member 13	-2.36	5.631
14751	PKMYT1	protein kinase, membrane associated tyrosine/threonine 1	-2.361	8.088
27319	TIMM8A	translocase of inner mitochondrial membrane 8 homolog A (yeast)	-2.368	7.956
2902	NCS1	neuronal calcium sensor 1	-2.376	4.904
11832	COL11A1	collagen type XI alpha 1 chain	-2.382	2.991
33212	LRRC55	leucine rich repeat containing 55	-2.383	3.196
22818	TAP1	transporter 1, ATP binding cassette subfamily B member	-2.385	4.331
4111	TMEM132A	transmembrane protein 132A	-2.385	9.287
30851	ARHGAP11A	Rho GTPase activating protein 11A	-2.389	7.703
31996	SLC6A9	solute carrier family 6 member 9	-2.389	3.888
21256	HIST1H2AL	histone cluster 1, H2al	-2.392	9.678
27456	MAD2L1	MAD2 mitotic arrest deficient-like 1 (yeast)	-2.396	8.103
23200	S100A9	S100 calcium binding protein A9	-2.4	3.838
15997	HMGB3P1	high mobility group box 3 pseudogene 1	-2.401	9.313
10682	ESCO2	establishment of sister chromatid cohesion N-acetyltransferase 2	-2.405	7.678
45173	DSCC1	DNA replication and sister chromatid cohesion 1	-2.406	4.838
32223	CHAC2	ChaC cation transport regulator homolog 2	-2.408	5.506
5153	MEX3A	mex-3 RNA binding family member A	-2.411	5.888
44177	TEX30	testis expressed 30	-2.419	6.908
33329	FGFR3	fibroblast growth factor receptor 3	-2.42	3.181
3194	MRPL47	mitochondrial ribosomal protein L47	-2.428	10.832
23132	RPL39L	ribosomal protein L39 like	-2.436	5.687
27617	GPR137C	G protein-coupled receptor 137C	-2.444	6.62
21290	HIST1H2AE	histone cluster 1, H2ae	-2.458	10.576
23177	GNG4	G protein subunit gamma 4	-2.461	3.316
4549	PAQR4	progestin and adipoQ receptor family member 4	-2.469	9.121
24499	PRR11	proline rich 11	-2.469	11.047
23816	ELF4	E74 like ETS transcription factor 4	-2.481	6.566
20435	PLCH1	phospholipase C eta 1	-2.489	6.018
40949	LINC01232	long intergenic non-protein coding RNA 1232	-2.5	3.389
29806	HIST1H2BG	histone cluster 1, H2bg	-2.503	12.715
37007	CXCL17	C-X-C motif chemokine ligand 17	-2.511	2.136
11337	TK1	thymidine kinase 1	-2.512	8.76
24219	COL4A1	collagen type IV alpha 1 chain	-2.516	4.471
14074	E2F8	E2F transcription factor 8	-2.517	6.621
29036	PLOD2	procollagen-lysine,2-oxoglutarate 5-dioxygenase 2	-2.519	6.283
35850	CTSV	cathepsin V	-2.521	4.138
7074	DLGAP5	DLG associated protein 5	-2.522	7.095
28387	B4GALT2	beta-1,4-galactosyltransferase 2	-2.526	6.239
10208	ART3	ADP-ribosyltransferase 3	-2.528	4.337
32566	EXO1	exonuclease 1	-2.529	8.171
35269	BORA	bora, aurora kinase A activator	-2.547	7.618
26780	CDCA4	cell division cycle associated 4	-2.551	7.037
22111	DOLK	dolichol kinase	-2.568	5.629
15306	KIF11	kinesin family member 11	-2.569	9.069
15613	WARS	tryptophanyl-tRNA synthetase	-2.571	4.478
28741	HIST1H2BK	histone cluster 1, H2bk	-2.583	5.836
9804	IGHG4	immunoglobulin heavy constant gamma 4 (G4m marker)	-2.586	2.564
38467	CENPM	centromere protein M	-2.598	8.707
15948	DEPDC1B	DEP domain containing 1B	-2.603	6.559
18518	HIST2H2AA4	histone cluster 2, H2aa4	-2.605	7.006
17329	RSAD2	radical S-adenosyl methionine domain containing 2	-2.607	3.657
31921	THBS2	thrombospondin 2	-2.608	8.22
27793	DEUP1	deuterosome assembly protein 1	-2.612	4.349
5566	CIT	citron rho-interacting serine/threonine kinase	-2.616	8.717
4575	CTPS1	CTP synthase 1	-2.621	7.466
45187	HIST1H3I	histone cluster 1, H3i	-2.621	8.183
23893	RDH10	retinol dehydrogenase 10 (all-trans)	-2.634	3.876
45024	CDKN2A	cyclin dependent kinase inhibitor 2A	-2.641	5.225
44552	EZH2	enhancer of zeste 2 polycomb repressive complex 2 subunit	-2.643	10.284
41761	KIFC1	kinesin family member C1	-2.643	9.335
9650	HIST1H3B	histone cluster 1, H3b	-2.645	12.356
39562	CENPK	centromere protein K	-2.653	11.948
24520	AURKA	aurora kinase A	-2.659	7.784
21793	ADAMTS4	ADAM metallopeptidase with thrombospondin type 1 motif 4	-2.665	3.416
39081	FADS1	fatty acid desaturase 1	-2.669	7.299
26315	FN1	fibronectin 1	-2.672	8.297
41061	TYMS	thymidylate synthetase	-2.68	7.698
4971	FAM72D	family with sequence similarity 72 member D	-2.682	7.313
38108	HIST1H1A	histone cluster 1, H1a	-2.692	5.087
18712	HRASLS	HRAS like suppressor	-2.693	4.291
25554	DHCR7	7-dehydrocholesterol reductase	-2.697	6.511
24685	ASPN	asporin	-2.706	8.444
34815	SGO2	shugoshin 2	-2.707	7.859
24176	CHRNA5	cholinergic receptor nicotinic alpha 5 subunit	-2.724	6.881
23484	ECT2	epithelial cell transforming 2	-2.724	11.72
18715	RAD51AP1	RAD51 associated protein 1	-2.73	9.423
12477	CXCL10	C-X-C motif chemokine ligand 10	-2.741	2.933
36136	LAMP3	lysosomal associated membrane protein 3	-2.748	3.564
37854	PMEPA1	prostate transmembrane protein, androgen induced 1	-2.754	5.899
12295	BLM	Bloom syndrome RecQ like helicase	-2.766	7.325
11025	CCNB1	cyclin B1	-2.766	10.434
33802	CP	ceruloplasmin (ferroxidase)	-2.766	2.628
29358	E2F1	E2F transcription factor 1	-2.77	9.915
20390	KIF2C	kinesin family member 2C	-2.774	11.099
2901	MCM4	minichromosome maintenance complex component 4	-2.775	8.413
14326	CCNE2	cyclin E2	-2.786	5.92
41530	HMGB3	high mobility group box 3	-2.786	10.436
5260	RNF182	ring finger protein 182	-2.804	2.743
4913	CKS2	CDC28 protein kinase regulatory subunit 2	-2.818	12.354
17444	CENPW	centromere protein W	-2.819	7.16
31058	HN1	hematological and neurological expressed 1	-2.819	11.144
15907	ZWINT	ZW10 interacting kinetochore protein	-2.825	10.917
25977	C11orf96	chromosome 11 open reading frame 96	-2.838	4.436
40783	MCM10	minichromosome maintenance 10 replication initiation factor	-2.839	6.62
42905	VANGL1	VANGL planar cell polarity protein 1	-2.869	6.851
13537	PAX6	paired box 6	-2.871	4.203
21456	PNPLA3	patatin like phospholipase domain containing 3	-2.876	3.304
35364	FANCA	Fanconi anemia complementation group A	-2.878	5.37
9027	PCOLCE2	procollagen C-endopeptidase enhancer 2	-2.878	5.874
21464	CTGF	connective tissue growth factor	-2.879	3.226
24214	MICB	MHC class I polypeptide-related sequence B	-2.887	4.218
12284	GSDMC	gasdermin C	-2.899	4.518
40430	RAD51	RAD51 recombinase	-2.907	9.999
19203	EN1	engrailed homeobox 1	-2.941	3.141
4672	FAM64A	family with sequence similarity 64 member A	-2.941	6.782
10768	TFDP3	transcription factor Dp family member 3	-2.947	10.109
31294	H2AFX	H2A histone family member X	-2.96	8.407
25164	CLSPN	claspin	-2.961	10.307
12057	TROAP	trophinin associated protein	-2.962	9.394
30833	CHEK1	checkpoint kinase 1	-2.968	8.468
24493	QPCT	glutaminyl-peptide cyclotransferase	-2.976	3.59
27867	PIF1	PIF1 5'-to-3' DNA helicase	-2.979	7.567
35989	GGH	gamma-glutamyl hydrolase	-3.001	6.633
40927	CCL18	C-C motif chemokine ligand 18	-3.009	4.829
28674	S100A8	S100 calcium binding protein A8	-3.013	2.012
30426	SPAG5	sperm associated antigen 5	-3.013	9.703
41394	TMSB15A	thymosin beta 15a	-3.048	4.718
43561	IL4I1	interleukin 4 induced 1	-3.049	4.744
2704	PLK1	polo like kinase 1	-3.055	7.531
22740	SOX11	SRY-box 11	-3.055	2.865
45188	GLDC	glycine decarboxylase	-3.061	4.907
15638	MMP1	matrix metallopeptidase 1	-3.063	4.025
39470	IFI27	interferon alpha inducible protein 27	-3.073	4.097
29363	CCNA2	cyclin A2	-3.076	9.605
34682	BUB1B	BUB1 mitotic checkpoint serine/threonine kinase B	-3.134	9.281
35529	SLC16A3	solute carrier family 16 member 3	-3.138	6.706
15323	MMP11	matrix metallopeptidase 11	-3.148	5.411
4502	CDK1	cyclin dependent kinase 1	-3.157	12.57
1097	CDC25A	cell division cycle 25A	-3.179	7.73
9916	C2	complement component 2	-3.18	6.883
22631	OIP5	Opa interacting protein 5	-3.181	12.565
26459	CDC6	cell division cycle 6	-3.225	10.725
27864	TCAM1P	testicular cell adhesion molecule 1, pseudogene	-3.259	8.113
41656	KIF14	kinesin family member 14	-3.261	10.264
39496	C1orf186	chromosome 1 open reading frame 186	-3.298	2.845
42676	KIF20A	kinesin family member 20A	-3.298	11.643
32029	CCNE1	cyclin E1	-3.299	10.799
31719	TUBB3	tubulin beta 3 class III	-3.325	6.333
13789	PRC1	protein regulator of cytokinesis 1	-3.332	14.241
10443	DTL	denticleless E3 ubiquitin protein ligase homolog	-3.355	9.79
29025	GJB2	gap junction protein beta 2	-3.411	5.365
27397	NUF2	NUF2, NDC80 kinetochore complex component	-3.458	11.266
24624	BUB1	BUB1 mitotic checkpoint serine/threonine kinase	-3.46	12.017
2128	NEK2	NIMA related kinase 2	-3.498	11.667
2756	HJURP	Holliday junction recognition protein	-3.506	13.776
12747	SKA3	spindle and kinetochore associated complex subunit 3	-3.528	10.694
36209	MB21D1	Mab-21 domain containing 1	-3.555	8.112
26579	CAMP	cathelicidin antimicrobial peptide	-3.592	5.84
39736	MELK	maternal embryonic leucine zipper kinase	-3.619	13.196
10052	SIX1	SIX homeobox 1	-3.622	3.907
4782	KIF18A	kinesin family member 18A	-3.629	11.669
14268	CDCA8	cell division cycle associated 8	-3.643	9.769
9084	ELAVL2	ELAV like neuron-specific RNA binding protein 2	-3.648	8.876
30155	CT83	cancer/testis antigen 83	-3.66	7.964
42055	HMMR-AS1	HMMR antisense RNA 1	-3.667	11.745
40603	EDN2	endothelin 2	-3.674	4.215
18901	FAM83D	family with sequence similarity 83 member D	-3.693	13.009
36027	TACC3	transforming acidic coiled-coil containing protein 3	-3.719	11.329
32202	NUSAP1	nucleolar and spindle associated protein 1	-3.739	12.857
17272	UBE2T	ubiquitin conjugating enzyme E2 T	-3.742	12.837
39088	NDC80	NDC80, kinetochore complex component	-3.753	10.226
29071	CDCA5	cell division cycle associated 5	-3.776	13.344
13798	ADAMDEC1	ADAM like decysin 1	-3.785	4.55
9959	MND1	meiotic nuclear divisions 1	-3.807	9.631
2597	CDKN3	cyclin dependent kinase inhibitor 3	-3.809	12.204
3813	CXCL9	C-X-C motif chemokine ligand 9	-3.825	3.09
17230	DNAPTP3///FN1	histone demethylase UTY-like///fibronectin 1	-3.829	8.399
12754	NMU	neuromedin U	-3.83	4.964
21467	PBK	PDZ binding kinase	-3.858	9.764
33268	NCAPG	non-SMC condensin I complex subunit G	-3.859	12.967
33247	CXCL11	C-X-C motif chemokine ligand 11	-3.871	4.519
972	SPC25	SPC25, NDC80 kinetochore complex component	-3.872	11.526
14670	ZNF695	zinc finger protein 695	-3.886	11.084
35183	CENPU	centromere protein U	-3.903	14.298
40843	RAD54L	RAD54-like (S. cerevisiae)	-3.919	13.425
17062	FADS2	fatty acid desaturase 2	-3.942	7.72
6890	CENPF	centromere protein F	-3.971	11.184
26042	PTTG1	pituitary tumor-transforming 1	-3.988	10.754
10329	HORMAD1	HORMA domain containing 1	-4	3.951
8711	E2F2	E2F transcription factor 2	-4.021	8.953
35495	ASPM	abnormal spindle microtubule assembly	-4.051	13.982
21767	UCHL1	ubiquitin C-terminal hydrolase L1	-4.069	5.499
8545	CEP55	centrosomal protein 55	-4.073	11.97
39135	CTHRC1	collagen triple helix repeat containing 1	-4.092	7.434
27754	TTK	TTK protein kinase	-4.121	15.087
34950	KIF23	kinesin family member 23	-4.15	12.28
22798	HMMR	hyaluronan mediated motility receptor	-4.187	9.871
19472	ANLN	anillin actin binding protein	-4.221	16.776
10068	SPC24	SPC24, NDC80 kinetochore complex component	-4.284	11.611
23428	KIF18B	kinesin family member 18B	-4.323	11.175
36067	BIRC5	baculoviral IAP repeat containing 5	-4.343	13.276
40595	LMNB1	lamin B1	-4.35	9.692
28409	GINS1	GINS complex subunit 1	-4.407	11.883
4473	PRAME	preferentially expressed antigen in melanoma	-4.472	3.569
11772	CDC45	cell division cycle 45	-4.51	10.55
16755	CENPA	centromere protein A	-4.529	14.379
12550	S100P	S100 calcium binding protein P	-4.614	6.683
32847	FAM111B	family with sequence similarity 111 member B	-4.634	13.32
8710	TPX2	TPX2, microtubule nucleation factor	-4.676	16.6
21075	TOP2A	topoisomerase (DNA) II alpha	-4.769	11.356
2612	ZIC1	Zic family member 1	-4.932	6.515

## Sheet: not_norm1
ID	Gene.symbol	Gene.title	log2(fold change)	-LOG10(Pvalue)
23148	SCGB1D1	secretoglobin family 1D member 1	6.609	9.061
7547			6.455	6.804
16862	SCGB1D2	secretoglobin family 1D member 2	6.351	8.894
3456	ANKRD30A	ankyrin repeat domain 30A	6.274	10.193
33130	PIP	prolactin induced protein	6.182	6.554
11458	SCGB2A2	secretoglobin family 2A member 2	6.163	5.814
26786	COL17A1	collagen type XVII alpha 1 chain	5.528	14.146
22382	PIGR	polymeric immunoglobulin receptor	5.391	6.695
43891	WIF1	WNT inhibitory factor 1	5.372	5.307
36172	SCN2B	sodium voltage-gated channel beta subunit 2	5.174	9.274
17974	PI15	peptidase inhibitor 15	5.168	10.679
5044	TP63	tumor protein p63	4.951	8.146
26516	RIC3	RIC3 acetylcholine receptor chaperone	4.91	12.209
990	EDN3	endothelin 3	4.871	9.94
12680	HMGCS2	3-hydroxy-3-methylglutaryl-CoA synthase 2	4.8	7.443
39786	OXTR	oxytocin receptor	4.725	11.135
1383			4.717	8.65
7763	NPY2R	neuropeptide Y receptor Y2	4.693	8.309
23515	CLDN11	claudin 11	4.692	7.77
32385			4.659	11.269
21828	KIAA1456	KIAA1456	4.588	10.819
3447			4.575	8.692
886	APOD	apolipoprotein D	4.55	7.672
2951			4.506	9.408
38102	HS3ST4	heparan sulfate-glucosamine 3-sulfotransferase 4	4.417	5.954
16655	CARMN	cardiac mesoderm enhancer-associated non-coding RNA	4.404	8.658
36530	PIK3C2G	phosphatidylinositol-4-phosphate 3-kinase catalytic subunit type 2 gamma	4.4	12.628
18011	KLHL13	kelch like family member 13	4.386	8.927
486	SCUBE2	signal peptide, CUB domain and EGF like domain containing 2	4.348	7.634
37396	NTRK2	neurotrophic receptor tyrosine kinase 2	4.306	5.366
28920	TP63	tumor protein p63	4.287	10.248
22589			4.264	6.675
4301	SEMA6D	semaphorin 6D	4.181	8.35
25257			4.141	6.52
16886	DNALI1	dynein axonemal light intermediate chain 1	4.102	6.518
19047	ACTA2-AS1	ACTA2 antisense RNA 1	4.071	8.908
11440	NTRK2	neurotrophic receptor tyrosine kinase 2	4.069	5.617
10062	MUCL1	mucin like 1	4.062	2.644
32092	RIC3	RIC3 acetylcholine receptor chaperone	4.048	11.416
12591			4.029	7.203
23579	THSD4	thrombospondin type 1 domain containing 4	4.015	6.437
5207	HOXA7	homeobox A7	3.981	6.18
1837	MYH11	myosin heavy chain 11	3.968	8.592
35088	KIF5C	kinesin family member 5C	3.964	7.245
35958	MYBPC1	myosin binding protein C, slow type	3.948	5.767
24266	CAPN8	calpain 8	3.912	9.318
36415	GSTM2	glutathione S-transferase mu 2 (muscle)	3.903	8.8
23192			3.899	6.236
44176	TFAP2B	transcription factor AP-2 beta	3.888	3.792
14740	ERBB4	erb-b2 receptor tyrosine kinase 4	3.881	6.688
45156	CCL28	C-C motif chemokine ligand 28	3.867	9.881
26546	ESR1	estrogen receptor 1	3.861	7.453
14080	ESR1	estrogen receptor 1	3.861	7.289
8973	IQCA1	IQ motif containing with AAA domain 1	3.844	7.276
9321	HOXA-AS3	HOXA cluster antisense RNA 3	3.829	5.953
18336	ESR1	estrogen receptor 1	3.81	7.118
8198	DMD	dystrophin	3.8	7.066
1798	HCAR1	hydroxycarboxylic acid receptor 1	3.8	6.266
31443	PTN	pleiotrophin	3.791	5.046
42318	PDK4	pyruvate dehydrogenase kinase 4	3.774	10.063
25949	DNAH5	dynein axonemal heavy chain 5	3.753	14.303
5572			3.733	11.98
8394	ESR1	estrogen receptor 1	3.721	7.425
27066	NXNL2	nucleoredoxin-like 2	3.715	7.227
34202	ESR1	estrogen receptor 1	3.707	6.968
37018	ESR1	estrogen receptor 1	3.703	7.453
9882	ESR1	estrogen receptor 1	3.682	6.422
3995	ESR1	estrogen receptor 1	3.678	7.793
40950	GRPR	gastrin releasing peptide receptor	3.674	7.495
14341			3.658	5.877
39184	COL4A6	collagen type IV alpha 6 chain	3.639	5.453
29209	CX3CR1	C-X3-C motif chemokine receptor 1	3.599	7.679
36475	AFF3	AF4/FMR2 family member 3	3.585	6.146
17466	ERBB4	erb-b2 receptor tyrosine kinase 4	3.584	6.105
37539	IL20RA	interleukin 20 receptor subunit alpha	3.584	5.188
11528			3.577	7.126
40856	PTN	pleiotrophin	3.573	5.027
27974	ESR1	estrogen receptor 1	3.571	7.046
4746			3.57	10.87
29558	TAT	tyrosine aminotransferase	3.562	7.033
44719	NRG1	neuregulin 1	3.552	7.78
9601	ESR1	estrogen receptor 1	3.55	6.907
9515	HOXA4	homeobox A4	3.524	8.885
33675	TP63	tumor protein p63	3.514	6.804
42916			3.496	7.619
34458	CLSTN2	calsyntenin 2	3.494	5.169
37531	RAI2	retinoic acid induced 2	3.485	5.406
39276	MIR100HG	mir-100-let-7a-2 cluster host gene	3.48	6.379
3191	PIGR	polymeric immunoglobulin receptor	3.472	8.156
18706	MIR4697HG	MIR4697 host gene	3.459	6.292
35203			3.455	6.513
12521	COL17A1	collagen type XVII alpha 1 chain	3.438	7.929
8758	SLC27A6	solute carrier family 27 member 6	3.433	6.71
9181	TMTC1	transmembrane and tetratricopeptide repeat containing 1	3.433	4.156
41812	DCDC2	doublecortin domain containing 2	3.417	6.767
26738	C1orf64	chromosome 1 open reading frame 64	3.416	5.244
25230	ITGBL1	integrin subunit beta like 1	3.409	8.166
11632	NAV3	neuron navigator 3	3.407	5.989
4446	DST	dystonin	3.401	8.032
34259	OR5P3	olfactory receptor family 5 subfamily P member 3	3.398	7.266
8632			3.366	8.049
14879	BTNL9	butyrophilin like 9	3.365	7.004
27527			3.364	4.109
41481	HOXA3	homeobox A3	3.358	5.188
16629	SAMD5	sterile alpha motif domain containing 5	3.357	5.803
8941			3.349	6.537
2518	CHL1	cell adhesion molecule L1 like	3.334	13.874
26987	CDO1	cysteine dioxygenase type 1	3.316	5.333
4145	FAM198B	family with sequence similarity 198 member B	3.312	6.741
11819	KCNC2	potassium voltage-gated channel subfamily C member 2	3.307	7.12
10789	TSHZ2	teashirt zinc finger homeobox 2	3.306	6.615
15381	COL14A1	collagen type XIV alpha 1 chain	3.303	8.082
9760	SCN4B	sodium voltage-gated channel beta subunit 4	3.288	6
2431	C1orf132	chromosome 1 open reading frame 132	3.285	7.28
5832	CAPN8	calpain 8	3.279	5.794
18746			3.26	8.269
11091	LAMA3	laminin subunit alpha 3	3.254	5.809
14969	TAT	tyrosine aminotransferase	3.243	6.271
23450	KCNJ16	potassium voltage-gated channel subfamily J member 16	3.239	6.295
37123	GSTM2P1	glutathione S-transferase mu 2 pseudogene 1	3.238	10.255
35725	PTHLH	parathyroid hormone like hormone	3.233	5.824
6011	TFF1	trefoil factor 1	3.233	2.5
20844	POTEB3	POTE ankyrin domain family member B3	3.228	5.183
9715	JCHAIN	joining chain of multimeric IgA and IgM	3.227	4.459
36307	DYNLRB2	dynein light chain roadblock-type 2	3.218	6.494
24818	THSD4	thrombospondin type 1 domain containing 4	3.213	4.952
44305			3.21	5.76
28679			3.207	5.438
36514	LINC00504	long intergenic non-protein coding RNA 504	3.196	7.649
43121	FGF14	fibroblast growth factor 14	3.195	8.03
22193			3.189	3.909
31104	FAM189A2	family with sequence similarity 189 member A2	3.186	6.026
15440	JCHAIN	joining chain of multimeric IgA and IgM	3.178	5.545
31854	PWAR5	Prader Willi/Angelman region RNA 5	3.163	9.368
43081	MYH11	myosin heavy chain 11	3.162	7.415
22047	COL14A1	collagen type XIV alpha 1 chain	3.154	5.309
12702	SPARCL1	SPARC like 1	3.146	5.512
31474	SIGLEC15	sialic acid binding Ig like lectin 15	3.146	3.301
8042			3.145	7.864
37734	PPP1R3C	protein phosphatase 1 regulatory subunit 3C	3.127	4.153
28814	IL33	interleukin 33	3.109	6.208
14688	FAXDC2	fatty acid hydroxylase domain containing 2	3.101	7.866
38338	AK5	adenylate kinase 5	3.101	6.954
21911	NTN4	netrin 4	3.101	6.321
25115	LINC00965	long intergenic non-protein coding RNA 965	3.098	6.391
39921	IRS1	insulin receptor substrate 1	3.096	4.919
37808	FGF1	fibroblast growth factor 1	3.079	7.849
31942	RBMS3	RNA binding motif single stranded interacting protein 3	3.071	5.839
24317	AGR3	anterior gradient 3, protein disulphide isomerase family member	3.066	3.904
34590	CNN1	calponin 1	3.061	5.547
11331	EFCAB1	EF-hand calcium binding domain 1	3.029	6.84
14205	HOXA9	homeobox A9	3.024	3.565
40016	CA8	carbonic anhydrase 8	3.023	4.238
41010	PEG3	paternally expressed 3	3.023	2.262
27210	ATP1A2	ATPase Na+/K+ transporting subunit alpha 2	3.018	5.491
17399			3.007	6.821
38982	BEX1	brain expressed X-linked 1	3.004	6.204
7710	FIGF	c-fos induced growth factor	2.993	4.691
10110	AMIGO2	adhesion molecule with Ig like domain 2	2.992	5.48
13150			2.982	5.968
27049	SLC40A1	solute carrier family 40 member 1	2.972	7.749
35523	NRG2	neuregulin 2	2.96	5.974
37104	LTBP2	latent transforming growth factor beta binding protein 2	2.957	4.828
23213			2.947	5.704
10790			2.943	7.247
17232	DCX	doublecortin	2.94	3.217
26358			2.933	3.75
19164	MAPT	microtubule associated protein tau	2.924	6.506
36518	RERGL	RERG like	2.924	4.554
26311	HBB	hemoglobin subunit beta	2.922	4.289
3542	MLPH	melanophilin	2.919	4.67
32703			2.905	3.646
43547	KIAA1456	KIAA1456	2.902	7.269
26985	ETV1	ETS variant 1	2.9	4.898
15909	ANO1	anoctamin 1	2.899	8.338
14994	SEMA5A	semaphorin 5A	2.893	5.603
206	CXCL2	C-X-C motif chemokine ligand 2	2.886	5.03
23650	FMO5	flavin containing monooxygenase 5	2.884	5.381
28407	DMRTC1	DMRT like family C1	2.882	5.243
14841	DMD	dystrophin	2.882	4.72
32214			2.875	6.404
40794	PGR	progesterone receptor	2.873	5.314
28777	INPP4B	inositol polyphosphate-4-phosphatase type II B	2.866	5.067
40779	IQUB	IQ motif and ubiquitin domain containing	2.865	7.238
37804	CMYA5	cardiomyopathy associated 5	2.863	6.063
10863	CHL1	cell adhesion molecule L1 like	2.862	6.45
36756	NME5	NME/NM23 family member 5	2.86	4.196
10395	ACTA2	actin, alpha 2, smooth muscle, aorta	2.858	5.9
37356			2.854	6.051
35849	CXCL14	C-X-C motif chemokine ligand 14	2.854	3.321
33981	SPATA18	spermatogenesis associated 18	2.85	5.203
18544	TESC	tescalcin	2.847	3.754
1926	PDK4	pyruvate dehydrogenase kinase 4	2.843	7.924
35007	STC2	stanniocalcin 2	2.839	7.33
41192	DCLK1	doublecortin like kinase 1	2.827	3.885
17970	FAM189A2	family with sequence similarity 189 member A2	2.822	5.182
33569	LIFR	leukemia inhibitory factor receptor alpha	2.819	4.69
2647	FAM47E	family with sequence similarity 47 member E	2.817	5.1
45012	XKR6	XK related 6	2.817	3.826
24115	HBB	hemoglobin subunit beta	2.812	4.354
40803			2.809	6.507
39475	PLAT	plasminogen activator, tissue type	2.805	4.277
21259	TMTC1	transmembrane and tetratricopeptide repeat containing 1	2.803	4.479
15846	DKK3	dickkopf WNT signaling pathway inhibitor 3	2.802	3.685
24695	SCGB3A1	secretoglobin family 3A member 1	2.799	3.998
35129	AR	androgen receptor	2.798	2.637
33419	BCL2	BCL2, apoptosis regulator	2.794	4.795
17649	HBB	hemoglobin subunit beta	2.786	4.431
8720			2.781	8.719
7344	SNRPN	small nuclear ribonucleoprotein polypeptide N	2.777	4.383
12871	NAV2	neuron navigator 2	2.768	8.956
43661	HBB	hemoglobin subunit beta	2.767	4.551
24458	AR	androgen receptor	2.766	2.64
18948	ZIM2///PEG3	zinc finger imprinted 2///paternally expressed 3	2.764	1.949
33383	SOCS2	suppressor of cytokine signaling 2	2.752	3.176
35825	ANKRD30BP3	ankyrin repeat domain 30B pseudogene 3	2.751	8.172
36686	PLAT	plasminogen activator, tissue type	2.751	4.157
3412	CSRNP3	cysteine and serine rich nuclear protein 3	2.751	3.613
30202			2.749	7.49
44235	AR	androgen receptor	2.749	2.669
14672	PLAT	plasminogen activator, tissue type	2.748	4.003
14469	PLAT	plasminogen activator, tissue type	2.747	4.056
35940	AR	androgen receptor	2.743	2.727
12351			2.737	4.37
14593			2.737	2.496
33503	AR	androgen receptor	2.734	2.728
39605	PLAT	plasminogen activator, tissue type	2.732	4.124
16493			2.728	6.459
18482	LAMA3	laminin subunit alpha 3	2.728	4.168
3099	CLIC6	chloride intracellular channel 6	2.723	4.64
36281	BCL2	BCL2, apoptosis regulator	2.721	4.833
35826	PLAT	plasminogen activator, tissue type	2.719	3.946
9672			2.716	6.891
9972			2.716	5.419
29081	KCNMA1	potassium calcium-activated channel subfamily M alpha 1	2.716	4.823
3547	PLAT	plasminogen activator, tissue type	2.715	4.21
27559	HBB	hemoglobin subunit beta	2.71	4.582
13611	RNF128	ring finger protein 128, E3 ubiquitin protein ligase	2.709	4.129
7370	CEP126	centrosomal protein 126	2.708	8.853
26770	TUBB2B	tubulin beta 2B class IIb	2.708	3.721
38036	LOC105379426	ankyrin repeat domain-containing protein 20A2	2.704	7.35
6620	PLAT	plasminogen activator, tissue type	2.698	4.146
27365	MEG3	maternally expressed 3 (non-protein coding)	2.696	9.194
34363			2.696	6.921
22772	MAPT	microtubule associated protein tau	2.696	5.869
22534	BCL2	BCL2, apoptosis regulator	2.691	4.79
20917	ITM2A	integral membrane protein 2A	2.687	5.135
31079	MAPT	microtubule associated protein tau	2.685	5.687
33262			2.685	4.857
3570	FOXA1	forkhead box A1	2.685	2.796
23593	CNTNAP3	contactin associated protein-like 3	2.683	2.954
25597	AR	androgen receptor	2.669	2.584
22885	AR	androgen receptor	2.668	2.625
16730	AR	androgen receptor	2.664	2.595
44406	CA12	carbonic anhydrase 12	2.663	3.593
28514	TFF3	trefoil factor 3	2.661	2.876
40710	PDGFA	platelet derived growth factor subunit A	2.659	7.209
42235	RBMS3	RNA binding motif single stranded interacting protein 3	2.654	6.313
2877	ALDH7A1	aldehyde dehydrogenase 7 family member A1	2.649	5.403
5886	PLAT	plasminogen activator, tissue type	2.647	4.341
21780	HBB	hemoglobin subunit beta	2.646	3.933
43637			2.644	6.299
26605	EGR3	early growth response 3	2.642	4.138
24809	HOTAIRM1	HOXA transcript antisense RNA, myeloid-specific 1	2.641	4.78
32079	SEMA5A	semaphorin 5A	2.64	4.641
19706	LUZP2	leucine zipper protein 2	2.64	3.822
38940	TENM2	teneurin transmembrane protein 2	2.639	7.685
21391	STC2	stanniocalcin 2	2.637	7.202
20735	FOXA1	forkhead box A1	2.637	2.941
34728	ADAMTS5	ADAM metallopeptidase with thrombospondin type 1 motif 5	2.634	6.153
9856	HBB	hemoglobin subunit beta	2.632	4.682
33984	TUBB2B	tubulin beta 2B class IIb	2.632	3.468
16911	NDN	necdin, MAGE family member	2.629	3.939
25155	FOXA1	forkhead box A1	2.629	2.826
28694	LTBP2	latent transforming growth factor beta binding protein 2	2.625	3.922
23424	FOXA1	forkhead box A1	2.625	2.927
31116	PLAT	plasminogen activator, tissue type	2.624	4.388
38426	FOXA1	forkhead box A1	2.622	2.874
16337	POTED	POTE ankyrin domain family member D	2.62	4.385
18290	LAMA3	laminin subunit alpha 3	2.615	5.059
30839	C2orf40	chromosome 2 open reading frame 40	2.611	7.206
42981	LIFR	leukemia inhibitory factor receptor alpha	2.61	5.16
12017	SEMA5A	semaphorin 5A	2.61	5.039
40521	NECAB1	N-terminal EF-hand calcium binding protein 1	2.607	6.101
40085	MAPT	microtubule associated protein tau	2.605	6.262
606	MAGI1	membrane associated guanylate kinase, WW and PDZ domain containing 1	2.603	7.394
16840	MLPH	melanophilin	2.603	4.782
18749	FOXA1	forkhead box A1	2.603	3.081
6887	MME	membrane metallo-endopeptidase	2.601	6.878
19216	AR	androgen receptor	2.601	2.685
31001	FOXA1	forkhead box A1	2.6	2.825
20713	OLFM4	olfactomedin 4	2.6	2.073
39087	GATA3	GATA binding protein 3	2.598	5.038
7224	FOXA1	forkhead box A1	2.596	2.798
14997	MAPT	microtubule associated protein tau	2.595	5.868
31918	FOXA1	forkhead box A1	2.595	2.841
35654	AR	androgen receptor	2.595	2.485
14747	C6orf10	chromosome 6 open reading frame 10	2.592	5.762
32054	MAGI2-AS3	MAGI2 antisense RNA 3	2.591	4.888
25789	SYNPO2	synaptopodin 2	2.59	5.681
20447	NRSN1	neurensin 1	2.586	6.811
42803			2.582	3.764
40963	CYP4F11	cytochrome P450 family 4 subfamily F member 11	2.579	3.266
28431	LOC399716	uncharacterized LOC399716	2.575	3.663
15445	BCL2	BCL2, apoptosis regulator	2.574	4.203
8938	FOXA1	forkhead box A1	2.573	2.849
18444	FAM101A	family with sequence similarity 101 member A	2.569	3.773
8099	KIAA1456	KIAA1456	2.568	5.22
7961			2.565	6.253
27291	BCL2	BCL2, apoptosis regulator	2.564	4.638
39862	HBB	hemoglobin subunit beta	2.564	4.403
28733	FOXA1	forkhead box A1	2.56	2.784
23895	BCL2	BCL2, apoptosis regulator	2.559	4.402
27149	MAMDC2	MAM domain containing 2	2.548	5.514
19801	TTC6	tetratricopeptide repeat domain 6	2.547	7.505
41271	HBB	hemoglobin subunit beta	2.547	4.429
35942	CD36	CD36 molecule	2.547	3.19
10040	SEPP1	selenoprotein P, plasma, 1	2.54	3.985
15595			2.538	6.683
37179	NTF4	neurotrophin 4	2.531	5.305
15709			2.528	6.324
8192			2.528	4.28
11382	MAPT	microtubule associated protein tau	2.523	6.048
15554	MAPT	microtubule associated protein tau	2.519	5.431
5196	WIF1	WNT inhibitory factor 1	2.516	4.117
30376			2.51	7.843
201			2.508	6.018
130	POTEC	POTE ankyrin domain family member C	2.502	5.289
17816	SCN7A	sodium voltage-gated channel alpha subunit 7	2.498	5.917
29330			2.491	7.032
18844	IGF1	insulin like growth factor 1	2.489	3.743
20504			2.483	3.947
22273	MGP	matrix Gla protein	2.482	4.97
14876	BCL2	BCL2, apoptosis regulator	2.479	4.644
37769	MAPT	microtubule associated protein tau	2.475	6.086
12074	BCL2	BCL2, apoptosis regulator	2.475	4.65
30691	CD36	CD36 molecule	2.474	3.573
30849			2.47	4.747
19218	GREB1	growth regulation by estrogen in breast cancer 1	2.469	4.838
20455			2.468	4.909
24539	ARHGAP20	Rho GTPase activating protein 20	2.462	6.554
40055	MLPH	melanophilin	2.457	5.416
7964	BCL2	BCL2, apoptosis regulator	2.454	4.206
22604	TOX3	TOX high mobility group box family member 3	2.452	2.771
28326	CLDN11	claudin 11	2.448	9.076
15929	IRX2	iroquois homeobox 2	2.447	3.715
27776			2.445	5.877
9939			2.442	4.633
23176	MAOA	monoamine oxidase A	2.442	3.646
42901	TECPR2	tectonin beta-propeller repeat containing 2	2.441	5.02
36361			2.439	8.761
29813			2.436	6.018
12218			2.432	6.533
5376	SPAG8	sperm associated antigen 8	2.432	3.525
2744	PGR	progesterone receptor	2.428	4.177
15131			2.426	7.439
30143	TPRG1	tumor protein p63 regulated 1	2.423	3.846
38970			2.422	6.008
24572	LRP2	LDL receptor related protein 2	2.422	3.39
43576	CD200	CD200 molecule	2.42	5.065
40662	BCL2	BCL2, apoptosis regulator	2.42	4.143
32239	BHLHE41	basic helix-loop-helix family member e41	2.42	2.915
38529	DACH1	dachshund family transcription factor 1	2.419	3.993
12108	NRG1	neuregulin 1	2.418	7.562
26911	HOXA5	homeobox A5	2.418	5.779
30926	MAGI2-AS3	MAGI2 antisense RNA 3	2.416	4.573
25059			2.415	4.022
10740	TBC1D9	TBC1 domain family member 9	2.406	4.401
24737			2.406	3.24
33153	CBX7	chromobox 7	2.401	7.59
34376	TFF3	trefoil factor 3	2.401	2.726
18621	HBB	hemoglobin subunit beta	2.396	3.534
38142	MAPT	microtubule associated protein tau	2.395	5.661
30845	ACADSB	acyl-CoA dehydrogenase, short/branched chain	2.394	5.83
34422	GRAMD1C	GRAM domain containing 1C	2.394	4.746
27957			2.39	5.952
36196			2.386	7.252
14228			2.383	4.757
34801	SYNPO2	synaptopodin 2	2.381	6.132
2242	IGF1	insulin like growth factor 1	2.381	3.697
7545	ACSM1	acyl-CoA synthetase medium-chain family member 1	2.378	4.364
4373	TMTC1	transmembrane and tetratricopeptide repeat containing 1	2.378	3.808
6311	IRS1	insulin receptor substrate 1	2.376	5.26
9231	MPPED2	metallophosphoesterase domain containing 2	2.374	3.96
779	LOC284112	uncharacterized LOC284112	2.373	5.548
7239			2.372	6.067
26970	ROBO3	roundabout guidance receptor 3	2.372	5.388
5904			2.371	5.588
3424	CTTNBP2	cortactin binding protein 2	2.369	4.745
28553	MAPT	microtubule associated protein tau	2.365	4.607
43354	PRKD1	protein kinase D1	2.361	5.078
11403			2.359	4.873
3819			2.358	6.519
15728	CXCL12	C-X-C motif chemokine ligand 12	2.358	3.106
37867	PRR15	proline rich 15	2.358	2.202
28956			2.356	5.189
9405			2.355	6.44
12079			2.355	5.426
36004	AZGP1	alpha-2-glycoprotein 1, zinc-binding	2.354	3.533
25927			2.353	6.744
9981			2.349	4.895
23837	MATN2	matrilin 2	2.348	3.126
30655			2.347	6.381
11316	RHOJ	ras homolog family member J	2.347	4.103
5586	SNURF	SNRPN upstream reading frame	2.34	3.658
36695	DAAM2	dishevelled associated activator of morphogenesis 2	2.339	3.838
30398			2.338	2.603
9019	IGHA2///IGHA1///IGH	immunoglobulin heavy constant alpha 2 (A2m marker)///immunoglobulin heavy constant alpha 1///immunoglobulin heavy locus	2.335	8.02
403	COX7A1	cytochrome c oxidase subunit 7A1	2.333	4.19
21372	LOC100509780	uncharacterized LOC100509780	2.331	4.205
14663	SPATA18	spermatogenesis associated 18	2.33	6.048
25075			2.329	2.945
25207			2.328	4.818
13034			2.324	3.193
27030	ABCG2	ATP binding cassette subfamily G member 2 (Junior blood group)	2.321	4.042
5403	N4BP2L1	NEDD4 binding protein 2 like 1	2.319	4.97
34612	IGF1	insulin like growth factor 1	2.319	3.585
28463	GPRASP1	G protein-coupled receptor associated sorting protein 1	2.318	5.671
14340			2.317	4.004
16548	MASP2	mannan binding lectin serine peptidase 2	2.316	5.658
10003	MAP2K6	mitogen-activated protein kinase kinase 6	2.311	5.435
13333	RERG	RAS like estrogen regulated growth inhibitor	2.311	4.266
35451	SP2	Sp2 transcription factor	2.31	5.425
18364	GRIA4	glutamate ionotropic receptor AMPA type subunit 4	2.306	8.245
15599	DKK3	dickkopf WNT signaling pathway inhibitor 3	2.306	5.004
26470	SEMA3G	semaphorin 3G	2.301	3.243
1832			2.299	3.458
9412	ITIH5	inter-alpha-trypsin inhibitor heavy chain family member 5	2.298	4.311
5337			2.298	4.077
44693	PDE1C	phosphodiesterase 1C	2.296	4.834
12014	MSX2	msh homeobox 2	2.296	4.141
18139	KLF3-AS1	KLF3 antisense RNA 1	2.295	4.865
14871	KIF5A	kinesin family member 5A	2.294	4.755
44635			2.294	3.511
36965	UBXN10	UBX domain protein 10	2.294	2.729
36042			2.293	4.627
36041			2.291	5.678
22182			2.29	4.345
10369			2.287	6.963
45107	SLC26A3	solute carrier family 26 member 3	2.285	5.839
33060	CXCL12	C-X-C motif chemokine ligand 12	2.283	2.984
13207	SP100	SP100 nuclear antigen	2.282	3.901
8759			2.281	9.307
41448			2.276	3.205
24032	SYBU	syntabulin	2.275	4.559
8879	PPP1R14A	protein phosphatase 1 regulatory inhibitor subunit 14A	2.272	4.552
33464	COX6B2	cytochrome c oxidase subunit 6B2	2.269	5.609
19852	LIFR	leukemia inhibitory factor receptor alpha	2.266	4.394
21505	PDLIM3	PDZ and LIM domain 3	2.264	4.987
19373	DKK3	dickkopf WNT signaling pathway inhibitor 3	2.264	4.911
29142			2.264	4.702
24519	TPM1	tropomyosin 1 (alpha)	2.263	6.331
10484			2.263	3.034
39007	SMYD1	SET and MYND domain containing 1	2.262	5.975
21432	IGF1	insulin like growth factor 1	2.262	3.491
14775	SH3BGRL2	SH3 domain binding glutamate rich protein like 2	2.261	3.73
35139	LAMB3	laminin subunit beta 3	2.254	3.711
477	GRPR	gastrin releasing peptide receptor	2.252	5.65
9014	RIC3	RIC3 acetylcholine receptor chaperone	2.25	4.093
33016	FMOD	fibromodulin	2.25	3.65
7892	CXCL12	C-X-C motif chemokine ligand 12	2.25	3.166
29063	PDGFRA	platelet derived growth factor receptor alpha	2.248	3.927
32192	NEDD4L	neural precursor cell expressed, developmentally down-regulated 4-like, E3 ubiquitin protein ligase	2.247	6.87
43058	TPTE	transmembrane phosphatase with tensin homology	2.246	5.198
14129	LCA5	LCA5, lebercilin	2.245	4.206
11972	FGF1	fibroblast growth factor 1	2.245	3.861
6437			2.243	6.166
3232			2.243	5.925
19639	SCGB2A1	secretoglobin family 2A member 1	2.243	2.617
36591	AZGP1	alpha-2-glycoprotein 1, zinc-binding	2.242	2.693
32613	VIT	vitrin	2.242	2.55
4311	GRAMD1C	GRAM domain containing 1C	2.237	5.758
28558	GRIK3	glutamate ionotropic receptor kainate type subunit 3	2.237	2.617
16164			2.235	3.954
21390	JAM3	junctional adhesion molecule 3	2.232	5.519
6059	RHOJ	ras homolog family member J	2.223	4.181
24613	IGF1	insulin like growth factor 1	2.22	3.106
40365	RERG	RAS like estrogen regulated growth inhibitor	2.218	5.147
43560	KIT	KIT proto-oncogene receptor tyrosine kinase	2.217	3.806
42003	CCDC158	coiled-coil domain containing 158	2.216	5.715
34485			2.216	5.503
11229	NRG1	neuregulin 1	2.215	4.284
7715	ANKRD20A12P	ankyrin repeat domain 20 family member A12, pseudogene	2.211	5.422
108	C1orf115	chromosome 1 open reading frame 115	2.211	3.852
13128	ANKRD20A2	ankyrin repeat domain 20 family member A2	2.209	3.886
29038			2.208	3.924
21328			2.207	5.654
23603	RHD	Rh blood group D antigen	2.205	5.381
3769	CFAP43	cilia and flagella associated protein 43	2.205	5.035
618	KIT	KIT proto-oncogene receptor tyrosine kinase	2.203	3.904
23092	ANKRD20A11P	ankyrin repeat domain 20 family member A11, pseudogene	2.195	4.946
36058	BEND5	BEN domain containing 5	2.193	3.56
1050	FANK1	fibronectin type III and ankyrin repeat domains 1	2.19	5.745
7105			2.189	8.142
28949	MYH3	myosin, heavy chain 3, skeletal muscle, embryonic	2.189	4.841
15588			2.188	3.727
24511			2.187	4.493
41458	KRT15	keratin 15	2.186	3.08
35058	AFAP1L2	actin filament associated protein 1 like 2	2.184	5.578
30932			2.183	6.324
6021	KIT	KIT proto-oncogene receptor tyrosine kinase	2.183	4.015
42829	KIT	KIT proto-oncogene receptor tyrosine kinase	2.183	3.951
45023	C4orf32	chromosome 4 open reading frame 32	2.18	4.463
18909	CXCL12	C-X-C motif chemokine ligand 12	2.179	2.682
8486	TMEM144	transmembrane protein 144	2.178	5.979
11223	LOC101930370	uncharacterized LOC101930370	2.178	5.568
7741			2.176	3.039
20739	KIT	KIT proto-oncogene receptor tyrosine kinase	2.175	3.831
5898	CXCL12	C-X-C motif chemokine ligand 12	2.173	2.948
11071			2.17	3.855
3854			2.168	7.138
28618	PDE2A	phosphodiesterase 2A	2.168	4.12
28283	KIT	KIT proto-oncogene receptor tyrosine kinase	2.167	3.947
25158			2.162	2.974
21039	ITGA11	integrin subunit alpha 11	2.161	4.55
43451	KIAA1324	KIAA1324	2.161	3.612
37307	RUNX1T1	RUNX1 translocation partner 1	2.16	2.997
1247	SDPR	serum deprivation response	2.159	4.712
44121	CFAP70	cilia and flagella associated protein 70	2.159	4.693
12383	TMEM26	transmembrane protein 26	2.157	5.218
29323	KIT	KIT proto-oncogene receptor tyrosine kinase	2.157	3.992
38258			2.155	4.461
39968	ITGBL1	integrin subunit beta like 1	2.155	4.327
31920	IL6ST	interleukin 6 signal transducer	2.154	5.313
17870	KRT5	keratin 5	2.154	2.895
6383	MATN2	matrilin 2	2.153	3.049
39261	TMEM237	transmembrane protein 237	2.152	3.758
27147	CTNND2	catenin delta 2	2.152	2.296
24162	KIT	KIT proto-oncogene receptor tyrosine kinase	2.15	3.951
12010	TAT	tyrosine aminotransferase	2.149	2.343
23368	KIT	KIT proto-oncogene receptor tyrosine kinase	2.146	4.013
7485	CXCL12	C-X-C motif chemokine ligand 12	2.145	2.737
34352	IGF1	insulin like growth factor 1	2.143	2.936
27621			2.14	4.909
1882	ARHGEF38	Rho guanine nucleotide exchange factor 38	2.14	4.524
37719			2.139	4.113
11711	NAP1L2	nucleosome assembly protein 1 like 2	2.132	5.807
15161	FAM3B	family with sequence similarity 3 member B	2.132	2.105
40059	ACADSB	acyl-CoA dehydrogenase, short/branched chain	2.131	4.67
12943	NOSTRIN	nitric oxide synthase trafficking	2.13	3.957
32392	NRSN1	neurensin 1	2.128	5.408
16716	RBMS3	RNA binding motif single stranded interacting protein 3	2.128	4.43
37462	PRICKLE2	prickle planar cell polarity protein 2	2.127	5.541
19116			2.127	4.006
13558			2.125	6.304
21592	KIT	KIT proto-oncogene receptor tyrosine kinase	2.125	3.8
18866	ZNF214	zinc finger protein 214	2.124	5.227
11303	POTEE	POTE ankyrin domain family member E	2.121	2.632
22358	IGF1	insulin like growth factor 1	2.12	3.132
18314	PDZK1	PDZ domain containing 1	2.119	4.545
18842			2.116	5.455
7277	ANKRD20A2	ankyrin repeat domain 20 family member A2	2.116	4.149
9119			2.115	4.99
12613	CPE	carboxypeptidase E	2.115	3.752
36357	TSHZ2	teashirt zinc finger homeobox 2	2.11	6.481
7824	CXCL12	C-X-C motif chemokine ligand 12	2.11	2.668
31819	ABCA11P	ATP binding cassette subfamily A member 11, pseudogene	2.108	5.817
26097			2.107	2.792
34823	TCEAL7	transcription elongation factor A like 7	2.106	6.852
16449			2.105	3.426
2719	SEMA6A	semaphorin 6A	2.102	3.505
37845	LIN7A	lin-7 homolog A, crumbs cell polarity complex component	2.101	3.112
21009	ANKRD20A2	ankyrin repeat domain 20 family member A2	2.099	4.159
12501	SEMA3C	semaphorin 3C	2.094	3.772
24283			2.092	3.463
5822	VIPR1	vasoactive intestinal peptide receptor 1	2.091	4.116
11075	CXCL12	C-X-C motif chemokine ligand 12	2.091	2.555
12965			2.09	3.057
3921			2.089	4.105
22513			2.089	3.103
31283	DMKN	dermokine	2.088	3.944
40381			2.087	7.537
41953	KCNMB1	potassium calcium-activated channel subfamily M regulatory beta subunit 1	2.085	3.902
18158			2.084	4.811
36422	JAM2	junctional adhesion molecule 2	2.083	3.429
33425	GLI3	GLI family zinc finger 3	2.083	3.288
22646	ANKRD20A2	ankyrin repeat domain 20 family member A2	2.08	3.586
8637			2.08	2.689
11529	TNS4	tensin 4	2.079	3.299
25660	LETM2	leucine zipper and EF-hand containing transmembrane protein 2	2.078	3.133
12361	CXCL12	C-X-C motif chemokine ligand 12	2.078	2.566
31986	ZDBF2	zinc finger DBF-type containing 2	2.077	2.475
10352	CACNA1C	calcium voltage-gated channel subunit alpha1 C	2.074	5.099
11362			2.073	2.876
4415	ARL4A	ADP ribosylation factor like GTPase 4A	2.071	5.799
189	MAOB	monoamine oxidase B	2.069	2.344
20871	PLPPR1	phospholipid phosphatase related 1	2.067	4.782
2767	PAK3	p21 (RAC1) activated kinase 3	2.067	3.89
40410	MAOB	monoamine oxidase B	2.067	2.203
18333	IGF1	insulin like growth factor 1	2.064	2.841
15726	SBSPON	somatomedin B and thrombospondin type 1 domain containing	2.062	3.217
37499	JADE2	jade family PHD finger 2	2.06	4.047
5460			2.058	4.375
29659	ZNF175	zinc finger protein 175	2.056	4.875
31350	INHBB	inhibin beta B subunit	2.056	3.143
34344	TGFBR2	transforming growth factor beta receptor 2	2.056	2.995
16524			2.054	3.646
18949	LOC105370792	uncharacterized LOC105370792	2.052	3.402
18275	SCN4A	sodium voltage-gated channel alpha subunit 4	2.051	3.888
22598			2.051	2.622
6121	LOC100129846///RBPMS	uncharacterized LOC100129846///RNA binding protein with multiple splicing	2.05	5.129
31278	KCNE1	potassium voltage-gated channel subfamily E regulatory subunit 1	2.049	3.359
20942	GSTT2	glutathione S-transferase theta 2 (gene/pseudogene)	2.048	3.814
17488	GSTM4	glutathione S-transferase mu 4	2.047	3.343
21116	LPCAT2	lysophosphatidylcholine acyltransferase 2	2.045	4.833
31912	NRG2	neuregulin 2	2.04	6.292
37297	TUB	tubby bipartite transcription factor	2.037	3.989
3299	ANGPTL7	angiopoietin like 7	2.034	5.145
6983			2.031	2.916
17823			2.03	5.185
13456			2.03	3.183
6517			2.026	4.442
3924	RHD	Rh blood group D antigen	2.025	7.419
33125			2.025	4.059
25629			2.023	5.278
27802	PDLIM3	PDZ and LIM domain 3	2.023	3.446
43171	IGF1	insulin like growth factor 1	2.023	2.978
22219	GRAMD3	GRAM domain containing 3	2.022	7.987
33477			2.021	4.999
29812	ANKRD20A8P	ankyrin repeat domain 20 family member A8, pseudogene	2.021	2.928
23323	ALB	albumin	2.017	2.254
32095	GREB1	growth regulation by estrogen in breast cancer 1	2.014	2.487
26711	CELF6	CUGBP, Elav-like family member 6	2.012	3.597
13827			2.01	3.451
2577			2.01	3.375
22800	TSGA10	testis specific 10	2.008	3.334
42172	RSPH1	radial spoke head 1 homolog	2.007	2.835
5618	EFCAB1	EF-hand calcium binding domain 1	2.004	6.212
38310	HEY2	hes related family bHLH transcription factor with YRPW motif 2	2.004	2.208
26968			2.003	7.651
1303			2.002	3.098
37974			2.002	2.428
12632			1.998	4.654
18646			1.998	2.777
8230			1.997	4.386
15282	TMEM220	transmembrane protein 220	1.996	3.149
2289			1.994	3.044
42740			1.992	4.947
13051	ZSCAN18	zinc finger and SCAN domain containing 18	1.989	3.562
8390	INHBB	inhibin beta B subunit	1.987	3.188
23071	ANKRD18A	ankyrin repeat domain 18A	1.985	5.441
18983			1.984	3.833
21200	NANOG	Nanog homeobox	1.984	2.543
33897	NPHP1	nephrocystin 1	1.981	5.904
8518	ABCB1	ATP binding cassette subfamily B member 1	1.979	6.058
7086	HOXB3	homeobox B3	1.979	3.08
1753	KIF13B	kinesin family member 13B	1.978	5.72
8942	LOC400464	ubiquitin conjugating enzyme E2 Q2 pseudogene	1.977	3.482
12024	LILRA2	leukocyte immunoglobulin like receptor A2	1.976	4.804
26321			1.973	4.691
38461			1.972	4.848
3855	ARHGAP19	Rho GTPase activating protein 19	1.97	6.764
33680			1.97	5.444
11664			1.97	2.17
40572	RBPMS	RNA binding protein with multiple splicing	1.968	4.685
1509	CREBRF	CREB3 regulatory factor	1.965	4.538
11682	LGR6	leucine rich repeat containing G protein-coupled receptor 6	1.965	3.103
11610	HOXB3	homeobox B3	1.964	2.725
7637			1.964	2.39
37102	ADCY10P1	adenylate cyclase 10, soluble pseudogene 1	1.962	3.994
8466	ABCB1	ATP binding cassette subfamily B member 1	1.961	5.074
29014			1.96	4.407
34030			1.958	4.341
4742			1.957	2.803
45157			1.956	4.782
24704	TAPT1-AS1	TAPT1 antisense RNA 1 (head to head)	1.954	3.634
18976	OR5P2	olfactory receptor family 5 subfamily P member 2	1.952	3.827
12073			1.951	6.182
1574	EDNRB	endothelin receptor type B	1.951	2.428
29938			1.949	3.645
17775	EDA2R	ectodysplasin A2 receptor	1.947	9.045
26411	DRC3	dynein regulatory complex subunit 3	1.946	6.559
6384			1.944	3.01
16143	TAGLN	transgelin	1.94	2.846
27901	NEIL1	nei like DNA glycosylase 1	1.939	4.428
33592	LOC100289058	uncharacterized LOC100289058	1.937	4.011
33846	CRACR2A	calcium release activated channel regulator 2A	1.936	2.773
21268	ANKRD42	ankyrin repeat domain 42	1.935	2.759
15076	GATS	GATS, stromal antigen 3 opposite strand	1.934	4.224
20320			1.933	2.341
25913	SEPP1	selenoprotein P, plasma, 1	1.932	3.586
35924	MICU3	mitochondrial calcium uptake family member 3	1.931	3.958
12901	POU5F2	POU domain class 5, transcription factor 2	1.931	3.018
33976			1.931	2.502
25035			1.927	6.751
1645	LRP2BP	LRP2 binding protein	1.926	4.996
2829	RSPO3	R-spondin 3	1.922	2.076
10237	CLDN11	claudin 11	1.919	8.655
14196	MME	membrane metallo-endopeptidase	1.918	3.574
34394	SYNM	synemin	1.917	2.57
30252	MEG3	maternally expressed 3 (non-protein coding)	1.916	7.592
19963	SEMA6D	semaphorin 6D	1.916	6.455
12958	AGR2	anterior gradient 2, protein disulphide isomerase family member	1.915	2.112
18014	IGF1	insulin like growth factor 1	1.914	2.6
54			1.913	2.458
35469	AKT3	AKT serine/threonine kinase 3	1.912	1.989
24618			1.911	4.047
7338	CLASRP	CLK4 associating serine/arginine rich protein	1.91	6.157
39075			1.91	3.691
32766			1.909	5.566
24524	ABCB1	ATP binding cassette subfamily B member 1	1.907	4.872
26158	ZNF135	zinc finger protein 135	1.906	3.621
4325	CD36	CD36 molecule	1.906	2.312
35365	MTURN	maturin, neural progenitor differentiation regulator homolog (Xenopus)	1.905	3.438
30301	XKR6	XK related 6	1.905	2.286
10439	CXCL12	C-X-C motif chemokine ligand 12	1.902	2.418
37946	AASS	aminoadipate-semialdehyde synthase	1.901	4.835
40028			1.899	7.461
20013	PCSK1	proprotein convertase subtilisin/kexin type 1	1.896	3.967
17081	PLPPR1	phospholipid phosphatase related 1	1.895	6.608
35759			1.895	4.407
39004	SRPX	sushi repeat containing protein, X-linked	1.892	4.111
43585	LRIG1	leucine rich repeats and immunoglobulin like domains 1	1.89	6.702
36944	OR5P1P	olfactory receptor family 5 subfamily P member 1 pseudogene	1.89	5.3
2009	RANBP3L	RAN binding protein 3 like	1.89	3.932
29762	AKT3	AKT serine/threonine kinase 3	1.889	2.111
20434	ZNF177	zinc finger protein 177	1.886	4.338
21691	WLS	wntless Wnt ligand secretion mediator	1.885	3.265
30727	LYRM9	LYR motif containing 9	1.883	5.055
24098	ABCA5	ATP binding cassette subfamily A member 5	1.882	7.278
33997	PLEKHH2	pleckstrin homology, MyTH4 and FERM domain containing H2	1.881	2.526
32407	MIR99AHG	mir-99a-let-7c cluster host gene	1.88	5.434
3870	ABAT	4-aminobutyrate aminotransferase	1.88	3.696
35933	CFI	complement factor I	1.88	3.089
12685	MIR100HG	mir-100-let-7a-2 cluster host gene	1.88	2.943
26	GMDS-AS1	GMDS antisense RNA 1 (head to head)	1.876	3.661
6884	GLIPR1L2	GLI pathogenesis-related 1 like 2	1.876	3.243
39279			1.876	3.216
26426			1.875	4.553
40077	RN7SL737P	RNA, 7SL, cytoplasmic 737, pseudogene	1.87	3.09
26558	CHIC1	cysteine rich hydrophobic domain 1	1.87	2.374
16602			1.866	4.421
40420	FMO2	flavin containing monooxygenase 2	1.866	3.063
22483	GSTM1	glutathione S-transferase mu 1	1.864	5.142
24636	CFI	complement factor I	1.864	4.309
32617	SLCO1A2	solute carrier organic anion transporter family member 1A2	1.862	3.615
42804	POTEE	POTE ankyrin domain family member E	1.862	1.956
5137	IRX4	iroquois homeobox 4	1.861	3.038
15777	COL4A5	collagen type IV alpha 5 chain	1.86	3.425
1844	PLEKHA6	pleckstrin homology domain containing A6	1.859	3.8
42879			1.856	3.652
5636	ZNF175	zinc finger protein 175	1.856	3.58
41811	XKR6	XK related 6	1.854	4.457
15980	DIXDC1	DIX domain containing 1	1.852	5.544
34573			1.852	4.757
34117			1.85	4.897
35679	ZNF608	zinc finger protein 608	1.85	3.323
40512			1.85	3.128
41370	FGF1	fibroblast growth factor 1	1.845	4.394
21345	C14orf37	chromosome 14 open reading frame 37	1.845	2.679
41241	SOCS2	suppressor of cytokine signaling 2	1.845	2.592
35256	NAIP	NLR family apoptosis inhibitory protein	1.844	4.595
2947	CYP4B1	cytochrome P450 family 4 subfamily B member 1	1.844	2.463
34488	LPCAT2	lysophosphatidylcholine acyltransferase 2	1.843	4.991
24592	CMYA5	cardiomyopathy associated 5	1.842	5.229
24828			1.842	4.345
19913	SPEF2	sperm flagellar 2	1.84	4.641
33015			1.84	3.676
32983	SCGB2A1	secretoglobin family 2A member 1	1.84	2.59
35821			1.835	2.55
32372	DIRAS3	DIRAS family GTPase 3	1.833	3.554
4816	GATA2	GATA binding protein 2	1.833	3.307
5306	PIK3R1	phosphoinositide-3-kinase regulatory subunit 1	1.833	3.068
19155			1.83	2.563
6506			1.827	3.272
20811	KCNMA1	potassium calcium-activated channel subfamily M alpha 1	1.826	3.488
27718	KCNJ8	potassium voltage-gated channel subfamily J member 8	1.823	2.742
21705			1.822	4.843
33965			1.822	3.941
40884	NRG1	neuregulin 1	1.821	7.06
3432	RORC	RAR related orphan receptor C	1.821	3.219
13035	C1QTNF3	C1q and tumor necrosis factor related protein 3	1.821	2.362
37696	ASPA	aspartoacylase	1.819	4.36
44325	AK5	adenylate kinase 5	1.816	5.964
13121	ACADSB	acyl-CoA dehydrogenase, short/branched chain	1.816	3.564
36407	PELI2	pellino E3 ubiquitin protein ligase family member 2	1.816	3.155
8340			1.815	6.375
8193			1.814	2.78
44676	GSTM3	glutathione S-transferase mu 3	1.813	3.369
16193	NDRG2	NDRG family member 2	1.811	3.533
38535	CRIM1	cysteine rich transmembrane BMP regulator 1	1.81	3.727
2108	CRIPT	CXXC repeat containing interactor of PDZ3 domain	1.809	6.537
24357	CX3CL1	C-X3-C motif chemokine ligand 1	1.807	2.726
17170	GLRA3	glycine receptor alpha 3	1.806	2.733
25367			1.805	7.454
37072	CACNA1D	calcium voltage-gated channel subunit alpha1 D	1.805	7.052
27942	ZNF154	zinc finger protein 154	1.805	5.4
25350			1.805	3.45
821	CCDC74B	coiled-coil domain containing 74B	1.805	2.801
18149			1.805	2.622
12594			1.803	2.912
19392			1.802	3.02
34800	MCTP2	multiple C2 and transmembrane domain containing 2	1.801	3.4
7593	SCNN1A	sodium channel epithelial 1 alpha subunit	1.798	2.474
10791	RNF133	ring finger protein 133	1.797	2.414
2355	ANO1	anoctamin 1	1.795	4.94
21797	GPRASP2	G protein-coupled receptor associated sorting protein 2	1.794	4.467
8605			1.792	3.42
41662			1.791	5.268
30780			1.79	3.881
2080	ABCB1	ATP binding cassette subfamily B member 1	1.789	4.663
31045	LAYN	layilin	1.789	3.313
33273	RBM43	RNA binding motif protein 43	1.787	5.942
4822	NAIP	NLR family apoptosis inhibitory protein	1.787	5.389
22472	GSTM4	glutathione S-transferase mu 4	1.786	3.042
20521	HBB	hemoglobin subunit beta	1.784	5.256
14239			1.784	3.144
3743	BBOX1	gamma-butyrobetaine hydroxylase 1	1.782	2.156
30517	TMEM25	transmembrane protein 25	1.781	3.314
28924	FAT3	FAT atypical cadherin 3	1.781	2.42
37483			1.778	2.312
39512			1.776	2.905
16709			1.774	5.38
27050	GSTM1	glutathione S-transferase mu 1	1.773	4.44
22933	ANKRA2	ankyrin repeat family A member 2	1.772	6.904
25323			1.77	3.809
44679			1.77	3.04
14084	EHD3	EH domain containing 3	1.769	2.413
3515	ABCC8	ATP binding cassette subfamily C member 8	1.768	5.21
37005	GSTM1	glutathione S-transferase mu 1	1.768	4.691
7072			1.768	3.721
19466	PLK2	polo like kinase 2	1.767	4.909
12938			1.766	5.099
27929			1.765	4.999
40009	SYTL2	synaptotagmin like 2	1.764	2.232
26749			1.763	4.04
32345	TSPYL1	TSPY like 1	1.761	3.929
28025	ABCB1	ATP binding cassette subfamily B member 1	1.759	3.906
9328			1.758	3.972
29523			1.758	3.74
19265	CLDN8	claudin 8	1.758	3.725
20173	FBXO2	F-box protein 2	1.758	2.119
5762			1.756	4.713
7193			1.755	4.625
43487	CRYBA1	crystallin beta A1	1.755	3.888
34296	GSTM1	glutathione S-transferase mu 1	1.753	4.441
12364			1.753	3.796
27870	MYLK	myosin light chain kinase	1.753	2.632
25121	MAB21L1	mab-21 like 1	1.752	3.126
18934	EIF3F	eukaryotic translation initiation factor 3 subunit F	1.75	4.202
44093	DYNC2H1	dynein cytoplasmic 2 heavy chain 1	1.75	3.675
19063			1.75	2.369
40504	KLB	klotho beta	1.748	6.12
35597	ABCB1	ATP binding cassette subfamily B member 1	1.748	5.191
29356			1.747	5.219
9380	GSTM1	glutathione S-transferase mu 1	1.747	4.377
18076	ITPR1	inositol 1,4,5-trisphosphate receptor type 1	1.747	2.817
25439			1.746	3.57
43050	RAB27B	RAB27B, member RAS oncogene family	1.745	4.022
4643	HSPA1L	heat shock protein family A (Hsp70) member 1 like	1.744	2.47
21749	PHLDB2	pleckstrin homology like domain family B member 2	1.744	2.291
25774			1.741	3.808
31200	MCTP2	multiple C2 and transmembrane domain containing 2	1.74	3.976
18743			1.739	4.075
28524	MIA2	melanoma inhibitory activity 2	1.736	3.75
41098	CRIM1	cysteine rich transmembrane BMP regulator 1	1.735	4.517
42274			1.735	3.236
17977			1.735	3.058
20331			1.734	2.849
33963	ERICH3	glutamate rich 3	1.733	4.089
12888	PDE8B	phosphodiesterase 8B	1.733	2.423
13728	STEAP2	STEAP2 metalloreductase	1.733	2.291
2842	GFRA1	GDNF family receptor alpha 1	1.732	2.995
19326	LYPD6	LY6/PLAUR domain containing 6	1.729	3.864
1484	C6orf10	chromosome 6 open reading frame 10	1.729	3.079
2237	GSTM1	glutathione S-transferase mu 1	1.728	4.514
13874			1.727	3.719
3529	SIDT1	SID1 transmembrane family member 1	1.726	2.695
5349	HEMK1	HemK methyltransferase family member 1	1.725	7.676
39453	SUGT1P3	SGT1 homolog, MIS12 kinetochore complex assembly cochaperone pseudogene 3	1.725	6.097
19191	PTHLH	parathyroid hormone like hormone	1.725	4.905
43961	RASSF6	Ras association domain family member 6	1.724	4.619
15615			1.723	2.841
26652	AGTR1	angiotensin II receptor type 1	1.721	6.065
23924			1.719	3.426
3787	F2RL2	coagulation factor II thrombin receptor like 2	1.718	3.233
6296	LOC284244	uncharacterized LOC284244	1.716	4.997
13105	MRPL43	mitochondrial ribosomal protein L43	1.716	2.751
1063	CAB39L	calcium binding protein 39 like	1.714	3.719
35999	ZNF462	zinc finger protein 462	1.712	3.398
7714	LINC00937	long intergenic non-protein coding RNA 937	1.711	5.431
44164			1.711	5.099
36830	FRY	FRY microtubule binding protein	1.71	3.486
10691	GSTM1	glutathione S-transferase mu 1	1.709	4.708
32025			1.709	3.532
42805			1.709	2.671
3189	ISM1	isthmin 1, angiogenesis inhibitor	1.707	2.482
35858	GCNT4	glucosaminyl (N-acetyl) transferase 4, core 2	1.707	2.076
22700			1.705	3.735
17755	C1orf168	chromosome 1 open reading frame 168	1.705	3.072
16417			1.705	2.438
43208	MSANTD2	Myb/SANT DNA binding domain containing 2	1.704	3.449
40228	LOC100289230	uncharacterized LOC100289230	1.702	4.805
2378			1.701	3.343
10834			1.701	2.889
13194	ZDHHC11	zinc finger DHHC-type containing 11	1.7	2.743
24096	EFNB3	ephrin B3	1.7	2.324
42646	ANKRD42	ankyrin repeat domain 42	1.697	3.893
23978			1.697	2.533
38555	GSTM1	glutathione S-transferase mu 1	1.696	4.328
16474			1.694	3.238
34061	KLHL9	kelch like family member 9	1.693	3.746
31056			1.692	2.879
2765			1.691	4.047
10939	IGF2	insulin like growth factor 2	1.691	2.369
41539	FBP1	fructose-bisphosphatase 1	1.691	2.193
23036			1.691	1.97
16676	NAV2	neuron navigator 2	1.69	4.644
2753			1.69	3.964
27810			1.69	2.829
16845			1.689	6.986
29567			1.689	5.337
16116	C3orf18	chromosome 3 open reading frame 18	1.688	3.666
4028	SEC31B	SEC31 homolog B, COPII coat complex component	1.687	5.458
41597	SBSPON	somatomedin B and thrombospondin type 1 domain containing	1.687	2.953
11122	KLHL29	kelch like family member 29	1.687	2.885
31433	TMC5	transmembrane channel like 5	1.687	2.085
31110	BBIP1	BBSome interacting protein 1	1.686	6.004
8824			1.685	3.323
31108	FAHD2CP///FAHD2B	fumarylacetoacetate hydrolase domain containing 2C, pseudogene///fumarylacetoacetate hydrolase domain containing 2B	1.684	3.635
38945	NR3C2	nuclear receptor subfamily 3 group C member 2	1.684	3.161
16839	AFP	alpha fetoprotein	1.684	2.339
35375	ESRRG	estrogen related receptor gamma	1.684	2.324
35207	ABCB1	ATP binding cassette subfamily B member 1	1.683	4.154
26512	CGNL1	cingulin like 1	1.683	3.875
6049			1.683	3.815
19903	SLC40A1	solute carrier family 40 member 1	1.682	3.074
22431	BMP5	bone morphogenetic protein 5	1.68	2.829
20253			1.679	4.773
43738	PGPEP1	pyroglutamyl-peptidase I	1.679	3.004
32113	TTC23L	tetratricopeptide repeat domain 23 like	1.679	2.19
20894			1.678	5.9
8114			1.678	4.213
33265	PRDM2	PR/SET domain 2	1.678	3.051
18294	PDE5A	phosphodiesterase 5A	1.678	2.351
27529	FMO4	flavin containing monooxygenase 4	1.677	2.965
15859	CDC14A	cell division cycle 14A	1.676	3.448
25041	SKAP1	src kinase associated phosphoprotein 1	1.676	2.033
10522			1.676	1.971
6398			1.675	4.297
9277			1.673	3.286
42327			1.672	3.954
30336	FBXL20	F-box and leucine rich repeat protein 20	1.672	3.585
14092			1.672	3.425
30929	GSTM4	glutathione S-transferase mu 4	1.67	2.61
12259			1.668	3.154
18755			1.668	2.87
29251	SPON1	spondin 1	1.668	2.71
14926	MYLK	myosin light chain kinase	1.666	2.706
40952	CIRBP	cold inducible RNA binding protein	1.663	5.272
12243	SYNPO2	synaptopodin 2	1.663	4.788
38666	GRIK1-AS2	GRIK1 antisense RNA 2	1.663	2.239
22098			1.659	4.361
1621	RIC3	RIC3 acetylcholine receptor chaperone	1.658	5.088
11419	SALL2	spalt like transcription factor 2	1.658	2.328
11616	LINC01158	long intergenic non-protein coding RNA 1158	1.657	2.83
16498			1.655	4.171
692	KCNMA1	potassium calcium-activated channel subfamily M alpha 1	1.655	3.27
40874			1.655	2.853
31855	MACROD2	MACRO domain containing 2	1.654	2.631
42379	GSTM1	glutathione S-transferase mu 1	1.652	4.389
18494	HPGD	hydroxyprostaglandin dehydrogenase 15-(NAD)	1.652	2.453
6875	ANKRD30B	ankyrin repeat domain 30B	1.65	2.133
2343	MIR99AHG	mir-99a-let-7c cluster host gene	1.647	4.807
7484			1.647	2.987
15888	LIFR-AS1	LIFR antisense RNA 1	1.646	2.856
26145	GPIHBP1	glycosylphosphatidylinositol anchored high density lipoprotein binding protein 1	1.645	3.045
4636			1.642	3.081
17837	RABEP1	rabaptin, RAB GTPase binding effector protein 1	1.641	3.784
3495	FSIP1	fibrous sheath interacting protein 1	1.641	1.967
15743			1.638	5.796
20875	FAM13A-AS1	FAM13A antisense RNA 1	1.638	3.234
19861	TNFSF12	tumor necrosis factor superfamily member 12	1.638	2.59
25239	STAT5A	signal transducer and activator of transcription 5A	1.637	2.642
4718	GSTM1	glutathione S-transferase mu 1	1.635	4.801
24650	RPAIN	RPA interacting protein	1.635	3.776
6713	TNS1	tensin 1	1.634	4.595
27795			1.633	4.24
27238	ZNF516	zinc finger protein 516	1.633	2.305
496	FAM110B	family with sequence similarity 110 member B	1.632	1.942
39801			1.631	4.934
26618	FAM110B	family with sequence similarity 110 member B	1.631	2.048
25271	AMT	aminomethyltransferase	1.63	4.847
28245	SCN7A	sodium voltage-gated channel alpha subunit 7	1.63	3.483
20289	FAM126A	family with sequence similarity 126 member A	1.63	3.101
20687	NME9	NME/NM23 family member 9	1.629	4.42
37553	ATP7A	ATPase copper transporting alpha	1.628	4.371
12382	SORBS1	sorbin and SH3 domain containing 1	1.627	2.766
24521	IQGAP2	IQ motif containing GTPase activating protein 2	1.627	2.699
21366	KIF13B	kinesin family member 13B	1.626	6.855
18372	RBM43	RNA binding motif protein 43	1.626	3.16
13634			1.626	2.278
10376	ABCA6	ATP binding cassette subfamily A member 6	1.624	3.353
18209	MOB3B	MOB kinase activator 3B	1.624	2.827
33333	FAM13A	family with sequence similarity 13 member A	1.623	4.143
22673	PSD2	pleckstrin and Sec7 domain containing 2	1.623	4.007
22874			1.623	3.169
20293	ECHDC2	enoyl-CoA hydratase domain containing 2	1.622	7.077
35091	NFIA	nuclear factor I A	1.622	2.727
16221	DSC1	desmocollin 1	1.62	3.191
4522			1.618	2.482
3758	POTEM	POTE ankyrin domain family member M	1.618	2.253
28809	SLC25A26	solute carrier family 25 member 26	1.617	4.2
31606			1.616	3.395
37510			1.615	3.146
38912	ENPP1	ectonucleotide pyrophosphatase/phosphodiesterase 1	1.614	3.169
40809			1.613	5.489
20609	CIRBP	cold inducible RNA binding protein	1.613	4.605
17484	TBX3	T-box 3	1.613	2.365
33226	LGR6	leucine rich repeat containing G protein-coupled receptor 6	1.612	3.4
11456	RASSF9	Ras association domain family member 9	1.611	2.209
23828			1.61	4.86
17698			1.61	4.374
40254			1.609	3.798
31574	SLC7A14	solute carrier family 7 member 14	1.608	4.37
43039	PLIN1	perilipin 1	1.607	3.087
39970	BMP2K	BMP2 inducible kinase	1.606	6.594
27393	MAP3K1	mitogen-activated protein kinase kinase kinase 1	1.606	3.79
42493	MPV17L	MPV17 mitochondrial inner membrane protein like	1.606	1.961
33114	ARHGAP19	Rho GTPase activating protein 19	1.604	4.135
29196	RGS5	regulator of G-protein signaling 5	1.604	1.937
18833	GUSBP3	glucuronidase, beta pseudogene 3	1.603	5.372
14645			1.601	4.718
9188			1.601	3.026
24298			1.599	3.971
40115	SUGT1P3	SGT1 homolog, MIS12 kinetochore complex assembly cochaperone pseudogene 3	1.599	3.035
37924	NEDD4L	neural precursor cell expressed, developmentally down-regulated 4-like, E3 ubiquitin protein ligase	1.598	4.725
6386	LOC158863	uncharacterized LOC158863	1.595	5.29
35741	NOS1AP	nitric oxide synthase 1 adaptor protein	1.595	3.205
39798			1.593	5.938
31956			1.593	1.949
7965			1.591	2.379
30033	ERICH1	glutamate rich 1	1.59	4.44
5982	EYS	eyes shut homolog (Drosophila)	1.59	4.163
22375			1.59	4.118
21602			1.589	4.777
6155			1.589	2.201
11062			1.588	3.292
2945	SNX2	sorting nexin 2	1.587	2.87
36584	CFAP53	cilia and flagella associated protein 53	1.586	4.617
2922			1.586	4.557
32244	SLC4A7	solute carrier family 4 member 7	1.586	3.328
23121	TRIM68	tripartite motif containing 68	1.585	3.656
3922	DRAIC	downregulated RNA in cancer, inhibitor of cell invasion and migration	1.582	2.953
21921			1.581	3.636
45168	HLF	HLF, PAR bZIP transcription factor	1.579	2.064
16268	THRB	thyroid hormone receptor beta	1.577	2.867
16069	NDST1	N-deacetylase and N-sulfotransferase 1	1.576	3.967
1071			1.576	3.103
12826	SPATA6L	spermatogenesis associated 6 like	1.575	2.439
12381	ITGA2	integrin subunit alpha 2	1.574	4.918
16600	IDS	iduronate 2-sulfatase	1.573	3.118
33305			1.572	4.006
8430			1.572	3.398
20483	ABCA5	ATP binding cassette subfamily A member 5	1.57	7.32
4891	CDC14A	cell division cycle 14A	1.57	3.906
23982	SGSM2	small G protein signaling modulator 2	1.57	3.658
21010	RTN4RL1	reticulon 4 receptor like 1	1.57	3.308
24361			1.57	2.708
5302			1.57	1.983
10643	PIK3R1	phosphoinositide-3-kinase regulatory subunit 1	1.569	4.837
24132			1.569	2.754
30249	SMPD3	sphingomyelin phosphodiesterase 3	1.569	2.433
15944	PER2	period circadian clock 2	1.568	6.612
23382			1.567	3.245
30531			1.567	3.088
1987	NFIA	nuclear factor I A	1.567	2.985
5483	NDUFA5	NADH:ubiquinone oxidoreductase subunit A5	1.567	2.94
43122			1.567	2.285
17383	ZSWIM5	zinc finger SWIM-type containing 5	1.566	3.849
24886	ETV1	ETS variant 1	1.566	2.155
6705	PARVA	parvin alpha	1.565	4.464
12151	LOC101927056	uncharacterized LOC101927056	1.565	3.663
24982	CATSPER2	cation channel sperm associated 2	1.565	3.141
11167	ANKRD30BP2	ankyrin repeat domain 30B pseudogene 2	1.565	2.992
40607	ME3	malic enzyme 3	1.565	2.761
12435			1.564	3.657
24766			1.563	4.832
40036	BDH2	3-hydroxybutyrate dehydrogenase, type 2	1.563	4.39
43814	CCNG2	cyclin G2	1.563	2.954
21610	ZNF503	zinc finger protein 503	1.562	2.7
38740			1.56	3.055
10644	ZC3H6	zinc finger CCCH-type containing 6	1.559	5.251
9816	PLEKHM3	pleckstrin homology domain containing M3	1.558	2.551
20785	LAMA1	laminin subunit alpha 1	1.558	2.073
27821	TRIM66	tripartite motif containing 66	1.556	5.904
45183	C1orf226	chromosome 1 open reading frame 226	1.556	4.571
29453			1.556	2.718
20107	FYCO1	FYVE and coiled-coil domain containing 1	1.555	3.532
29122	EPB41L5	erythrocyte membrane protein band 4.1 like 5	1.555	2.607
29190			1.555	2.33
18800	KIAA0408	KIAA0408	1.555	2.21
5640	MEIS3P1	Meis homeobox 3 pseudogene 1	1.553	5.119
40385	ZNF442	zinc finger protein 442	1.553	4.201
9064	ABCA6	ATP binding cassette subfamily A member 6	1.552	3.281
36836	ARHGEF28	Rho guanine nucleotide exchange factor 28	1.551	2.855
20267			1.55	2.834
37717			1.549	4.183
28850	THAP6	THAP domain containing 6	1.549	4.032
34462			1.547	3.371
27138			1.546	5.108
29305			1.546	3.227
41681			1.545	5.89
10735	IL7	interleukin 7	1.545	3.575
27507	APBA1	amyloid beta precursor protein binding family A member 1	1.545	2.698
30149			1.544	3.274
16818	NEDD4L	neural precursor cell expressed, developmentally down-regulated 4-like, E3 ubiquitin protein ligase	1.543	3.544
360	NR3C1	nuclear receptor subfamily 3 group C member 1	1.542	3.605
7526	PLSCR4	phospholipid scramblase 4	1.542	2.857
30537	ABCB1	ATP binding cassette subfamily B member 1	1.541	3.023
2447			1.541	2.888
28817	TTC12	tetratricopeptide repeat domain 12	1.541	2.472
19817			1.54	6.222
18574	RHOT1	ras homolog family member T1	1.54	5.723
1316	NBEA	neurobeachin	1.54	3.851
41068	FBXO32	F-box protein 32	1.54	2.292
21466			1.539	3.39
18472	SPDYE8P	speedy/RINGO cell cycle regulator family member E8, pseudogene	1.538	3.868
13509			1.538	3.281
35676	HBA1	hemoglobin subunit alpha 1	1.537	6.171
9205	TBC1D19	TBC1 domain family member 19	1.537	5.302
39337			1.534	4.704
9367			1.534	2.975
26814	DNAH11	dynein axonemal heavy chain 11	1.533	2.201
2819	NAV3	neuron navigator 3	1.532	2.959
25968	STARD13-AS	STARD13 antisense RNA	1.531	2.235
20273	CCDC155	coiled-coil domain containing 155	1.53	5.115
29354	MUC6	mucin 6, oligomeric mucus/gel-forming	1.528	2.25
13769	CBX7	chromobox 7	1.527	7.128
16988			1.527	3.028
1911	ADH1A	alcohol dehydrogenase 1A (class I), alpha polypeptide	1.527	2.115
39522			1.526	3.76
3249	LTBP2	latent transforming growth factor beta binding protein 2	1.526	3.637
16549	ARL4A	ADP ribosylation factor like GTPase 4A	1.525	3.831
38127			1.524	2.752
9726	TRO	trophinin	1.524	2.166
5430	SH3BGRL2	SH3 domain binding glutamate rich protein like 2	1.524	1.991
4713	MIRLET7BHG	MIRLET7B host gene	1.523	4.31
25608	PTEN	phosphatase and tensin homolog	1.523	3.041
29010	HBS1L	HBS1 like translational GTPase	1.522	6.115
6765	FRMD6	FERM domain containing 6	1.522	2.348
19994	FGF2	fibroblast growth factor 2	1.522	2.032
25645	RANBP3L	RAN binding protein 3 like	1.521	4.068
41111	SLC25A30	solute carrier family 25 member 30	1.52	3.195
10121			1.519	4.299
10008			1.519	3.824
11404	NR3C1	nuclear receptor subfamily 3 group C member 1	1.518	3.729
33174	LOC100507053	uncharacterized LOC100507053	1.518	2.76
38240			1.518	2.496
567	SORBS1	sorbin and SH3 domain containing 1	1.517	3.498
20939	ALOX15B	arachidonate 15-lipoxygenase, type B	1.516	3.541
39063	RGL3	ral guanine nucleotide dissociation stimulator like 3	1.516	2.362
16778			1.515	2.579
33091	ANKRD65	ankyrin repeat domain 65	1.515	2.567
26283			1.515	2.534
24742	GTF2IRD2B///GTF2IRD2	GTF2I repeat domain containing 2B///GTF2I repeat domain containing 2	1.514	4.312
21841			1.514	3.576
42351			1.514	3.555
38929	DZANK1	double zinc ribbon and ankyrin repeat domains 1	1.514	3
30826			1.514	2.506
33574			1.513	4.962
24504	TCTN1	tectonic family member 1	1.513	3.995
15310	SLC26A10	solute carrier family 26 member 10	1.513	3.772
23280			1.513	2.999
35223			1.513	2.299
25763	ZNF219	zinc finger protein 219	1.512	5.592
21218	TAPT1-AS1	TAPT1 antisense RNA 1 (head to head)	1.512	3.661
29001	PLA2R1	phospholipase A2 receptor 1	1.511	3.018
31877			1.511	2.113
20433	MAPT	microtubule associated protein tau	1.51	4.779
25410	WDR78	WD repeat domain 78	1.51	3.114
646	MRPL42P5	mitochondrial ribosomal protein L42 pseudogene 5	1.51	2.978
17595	NLGN4Y	neuroligin 4, Y-linked	1.508	3.295
17249			1.506	3.653
12246			1.506	3.636
26112	GJC3	gap junction protein gamma 3	1.506	2.866
33368	MACROD2	MACRO domain containing 2	1.506	2.078
9195			1.504	3.924
27568			1.501	6.412
45199	CAV1	caveolin 1	1.5	2.384
38349	HOXA2	homeobox A2	1.498	7.623
10538			1.498	3.727
19121	MCF2L	MCF.2 cell line derived transforming sequence like	1.498	2.083
24526	NRXN1	neurexin 1	1.497	2.236
34318	CCDC122	coiled-coil domain containing 122	1.496	4.566
1088	KRT24	keratin 24	1.496	2.007
22105			1.495	3.873
28258			1.495	2.546
29126	TNS1	tensin 1	1.494	4.786
31795	NR3C1	nuclear receptor subfamily 3 group C member 1	1.494	4.014
4236	C1orf168	chromosome 1 open reading frame 168	1.494	3.375
31260	NFKBIZ	NFKB inhibitor zeta	1.494	1.997
10098			1.493	3.786
28959	SORCS2	sortilin related VPS10 domain containing receptor 2	1.492	3.825
28291			1.491	2.461
2661			1.49	5.498
7921	NEDD4L	neural precursor cell expressed, developmentally down-regulated 4-like, E3 ubiquitin protein ligase	1.49	4.594
23101	ITGA2	integrin subunit alpha 2	1.49	3.831
28163	PLEKHA5	pleckstrin homology domain containing A5	1.49	2.126
21455	SFRP1	secreted frizzled related protein 1	1.49	2.083
31628	KIAA1328	KIAA1328	1.489	2.717
1047			1.488	6.458
9216			1.488	2.167
26275	ARID2	AT-rich interaction domain 2	1.487	5.23
487			1.487	4.705
41234	ABCB1	ATP binding cassette subfamily B member 1	1.487	3.948
11953	METTL25	methyltransferase like 25	1.487	3.748
35343			1.486	6.979
34795			1.486	4.583
2710			1.486	2.191
24540	NR3C1	nuclear receptor subfamily 3 group C member 1	1.485	4.071
14787	SLC16A4	solute carrier family 16 member 4	1.485	3.227
42632	PRPH2	peripherin 2	1.485	2.363
24233	ERGIC1	endoplasmic reticulum-golgi intermediate compartment 1	1.485	2.256
30436			1.484	1.971
6587			1.483	4.905
14596			1.483	2.258
7543	C1QTNF3	C1q and tumor necrosis factor related protein 3	1.483	2.115
892	SIK3	SIK family kinase 3	1.483	2.004
23021			1.482	5.942
19898	ELL2	elongation factor for RNA polymerase II 2	1.481	2.849
21051	FAS	Fas cell surface death receptor	1.481	2.623
22676	DENND2C	DENN domain containing 2C	1.481	2.575
38456	EIF3J-AS1	EIF3J antisense RNA 1 (head to head)	1.48	4.193
25039	RGS5	regulator of G-protein signaling 5	1.479	2.816
36839			1.478	4.472
6692	TMEM163	transmembrane protein 163	1.478	3.954
45181	SSPN	sarcospan	1.478	2.266
23411			1.477	3.206
12774	DST	dystonin	1.476	6.891
39839	RBM5	RNA binding motif protein 5	1.476	3.537
8001	LINC00282	long intergenic non-protein coding RNA 282	1.476	2.936
13670			1.475	4.023
23576			1.474	4.572
39454	CFAP69	cilia and flagella associated protein 69	1.474	4.1
37043	DNAH5	dynein axonemal heavy chain 5	1.474	3.379
35180	LEPR	leptin receptor	1.473	2.46
37959	GULP1	GULP, engulfment adaptor PTB domain containing 1	1.473	2.091
42528	PDGFD	platelet derived growth factor D	1.472	3.765
20757	INPP4B	inositol polyphosphate-4-phosphatase type II B	1.471	2.806
41104			1.471	2.512
15025	LRRC6	leucine rich repeat containing 6	1.471	2.285
32553			1.47	4.083
22832			1.47	3.003
13892	ANGPTL1	angiopoietin like 1	1.47	2.099
31068	NKX2-1	NK2 homeobox 1	1.469	3.5
15247	LOC81787	uncharacterized LOC81787	1.469	3.159
44524	KIZ	kizuna centrosomal protein	1.469	2.253
44391			1.469	2.083
12093	CBX7	chromobox 7	1.468	9.603
32377	CLHC1	clathrin heavy chain linker domain containing 1	1.468	3.28
33564	GAS1	growth arrest specific 1	1.468	3.176
948	SLC7A2	solute carrier family 7 member 2	1.467	2.061
1518	FTO	fat mass and obesity associated	1.466	4.84
3661	LOC727820	uncharacterized LOC727820	1.466	3.524
12664	NR3C1	nuclear receptor subfamily 3 group C member 1	1.465	3.788
23239	LHFP	lipoma HMGIC fusion partner	1.464	2.895
38777	DNAH7	dynein axonemal heavy chain 7	1.463	2.847
24111	SLC25A27	solute carrier family 25 member 27	1.461	3.353
21296	PKD1	polycystin 1, transient receptor potential channel interacting	1.459	5.289
11655			1.459	2.979
28849			1.459	2.906
11187			1.459	2.734
18693			1.459	2.482
18379	TRIM9	tripartite motif containing 9	1.459	2.382
5336	ARL15	ADP ribosylation factor like GTPase 15	1.458	4.187
5505	IGF1R	insulin like growth factor 1 receptor	1.458	3.187
18013			1.458	2.915
10216	LOC100128288	uncharacterized LOC100128288	1.457	3.74
24584	NR3C1	nuclear receptor subfamily 3 group C member 1	1.457	3.696
2694	SLC7A8	solute carrier family 7 member 8	1.457	2.601
13681	ERO1B	endoplasmic reticulum oxidoreductase 1 beta	1.456	2.68
16964			1.456	2.313
16616	LOC101926935	uncharacterized LOC101926935	1.455	6.12
5453	GNG7	G protein subunit gamma 7	1.454	3.255
31879	LOC105377450	uncharacterized LOC105377450	1.453	3.135
34680			1.453	2.554
41687			1.453	2.32
42044			1.453	2.221
8200	SFRP1	secreted frizzled related protein 1	1.453	2.129
6299			1.453	2.01
4334			1.452	6.768
10054	CYBRD1	cytochrome b reductase 1	1.452	2.752
16711			1.452	2.523
27082	FAM175A	family with sequence similarity 175 member A	1.451	4.041
22488	TRABD2B	TraB domain containing 2B	1.45	6.692
10514	CCDC148	coiled-coil domain containing 148	1.45	2.465
25329			1.449	3.643
41352			1.449	2.65
5494			1.448	3.407
32259	SYNJ2	synaptojanin 2	1.448	2.396
34403			1.447	5.575
20075	AFF3	AF4/FMR2 family member 3	1.446	2.951
41851			1.446	2.827
26431			1.445	3.759
21213			1.445	3.147
16425	CROT	carnitine O-octanoyltransferase	1.444	3.064
44851			1.444	3.046
5759	ANKRD6	ankyrin repeat domain 6	1.444	2.903
11741	LEAP2	liver enriched antimicrobial peptide 2	1.444	2.859
24710			1.444	2.662
6926			1.442	5.818
12636	RERE	arginine-glutamic acid dipeptide repeats	1.441	4.549
5795	NR3C1	nuclear receptor subfamily 3 group C member 1	1.441	3.574
929			1.441	2.148
3474	APBB2	amyloid beta precursor protein binding family B member 2	1.44	3.905
23469			1.44	3.547
29725	C3orf52	chromosome 3 open reading frame 52	1.44	2.425
43020			1.44	2.106
33782	ESRRB	estrogen related receptor beta	1.439	4.155
33286			1.439	3.045
36322	NCOR1	nuclear receptor corepressor 1	1.438	3.671
29653			1.438	3.381
31736			1.438	3.323
32624			1.438	2.716
35912	MICU3	mitochondrial calcium uptake family member 3	1.437	2.576
27472	PALM3	paralemmin 3	1.437	1.955
3084	KIF16B	kinesin family member 16B	1.436	5.395
23114	FAM214A	family with sequence similarity 214 member A	1.435	3.466
[truncated: 5,192 more rows]

## Sheet: sig_norm
ID	Gene.symbol	Gene.title	log2(fold change)	-LOG10(Pvalue)
[truncated: 6,296 more rows]

[truncated: 5 more sheets: sig_not_norm, Annotated_norm, Annotated_not_norm, Duplicates_norm, Duplicate_not_norm]
